# Supplementary material
Source: publisher figshare collection journal article supplement (https://acs.figshare.com/ndownloader/files/11502752)
Supplement: Supplementary file 1 [file 11502752]

data_p16026_a
_audit_creation_date              2017-05-02
_audit_creation_method
;
Olex2 1.2
(compiled 2016.02.19 svn.r3266 for OlexSys, GUI svn.r5155)
;
_publ_contact_author_address      
;
Beckman Institute
Caltech 139-74
Pasadena CA 91125
USA
;
_publ_contact_author_email        xray@caltech.edu
_publ_contact_author_name         'Sarah E. Reisman'
_publ_contact_author_phone        ?
_publ_section_references
;
Dolomanov, O.V., Bourhis, L.J., Gildea, R.J, Howard, J.A.K. & Puschmann, H.
 (2009), J. Appl. Cryst. 42, 339-341.

Sheldrick, G.M. (2008). Acta Cryst. A64, 112-122.

Sheldrick, G.M. (2015). Acta Cryst. A71, 3-8.
;
_chemical_name_common             LMC-04-038
_chemical_name_systematic         LMC-04-038
_chemical_formula_moiety          'C23 H28 N2 O2'
_chemical_formula_sum             'C23 H28 N2 O2'
_chemical_formula_weight          364.47
_chemical_absolute_configuration  ad
_chemical_melting_point           ?
loop_
  _atom_type_symbol
  _atom_type_description
  _atom_type_scat_dispersion_real
  _atom_type_scat_dispersion_imag
  _atom_type_scat_source
 'C' 'C' 0.0181 0.0091 'International Tables Vol C Tables 4.2.6.8 and 6.1.1.4'
 'H' 'H' 0.0000 0.0000 'International Tables Vol C Tables 4.2.6.8 and 6.1.1.4'
 'N' 'N' 0.0311 0.0180 'International Tables Vol C Tables 4.2.6.8 and 6.1.1.4'
 'O' 'O' 0.0492 0.0322 'International Tables Vol C Tables 4.2.6.8 and 6.1.1.4'

_shelx_space_group_comment
;
The symmetry employed for this shelxl refinement is uniquely defined
by the following loop, which should always be used as a source of
symmetry information in preference to the above space-group names.
They are only intended as comments.
;
_space_group_crystal_system       'orthorhombic'
_space_group_IT_number            19
_space_group_name_H-M_alt         'P 21 21 21'
_space_group_name_Hall            'P 2ac 2ab'
loop_
  _space_group_symop_operation_xyz
 'x, y, z'
 '-x+1/2, -y, z+1/2'
 '-x, y+1/2, -z+1/2'
 'x+1/2, -y+1/2, -z'

_cell_length_a                    6.5496(4)
_cell_length_b                    10.8428(6)
_cell_length_c                    27.6666(15)
_cell_angle_alpha                 90
_cell_angle_beta                  90
_cell_angle_gamma                 90
_cell_volume                      1964.77(19)
_cell_formula_units_Z             4
_cell_measurement_reflns_used     9981
_cell_measurement_temperature     100
_cell_measurement_theta_max       79.33
_cell_measurement_theta_min       3.19
_shelx_estimated_absorpt_T_max    0.941
_shelx_estimated_absorpt_T_min    0.861
_exptl_absorpt_coefficient_mu     0.619
_exptl_absorpt_correction_T_max   0.7542
_exptl_absorpt_correction_T_min   0.7017
_exptl_absorpt_correction_type    multi-scan
_exptl_absorpt_process_details    'SADABS-2014/5 (Sheldrick, 2014)'
_exptl_absorpt_special_details    ?
_exptl_crystal_colour             colourless
_exptl_crystal_colour_primary     colourless
_exptl_crystal_density_diffrn     1.232
_exptl_crystal_density_meas       ?
_exptl_crystal_density_method     'not measured'
_exptl_crystal_description        Block
_exptl_crystal_F_000              784
_exptl_crystal_size_max           0.25
_exptl_crystal_size_mid           0.15
_exptl_crystal_size_min           0.1
_exptl_transmission_factor_max    ?
_exptl_transmission_factor_min    ?
_diffrn_reflns_av_R_equivalents   0.0414
_diffrn_reflns_av_unetI/netI      0.0246
_diffrn_reflns_Laue_measured_fraction_full 1.000
_diffrn_reflns_Laue_measured_fraction_max 0.992
_diffrn_reflns_limit_h_max        8
_diffrn_reflns_limit_h_min        -8
_diffrn_reflns_limit_k_max        13
_diffrn_reflns_limit_k_min        -13
_diffrn_reflns_limit_l_max        34
_diffrn_reflns_limit_l_min        -35
_diffrn_reflns_number             24424
_diffrn_reflns_point_group_measured_fraction_full 1.000
_diffrn_reflns_point_group_measured_fraction_max 0.979
_diffrn_reflns_theta_full         67.679
_diffrn_reflns_theta_max          79.392
_diffrn_reflns_theta_min          3.195
_diffrn_ambient_temperature       100
_diffrn_detector                  'CMOS Area Detector'
_diffrn_detector_area_resol_mean  10.24
_diffrn_detector_type             'Bruker PHOTON 100 CMOS'
_diffrn_measured_fraction_theta_full 1.000
_diffrn_measured_fraction_theta_max 0.992
_diffrn_measurement_device        '\k-geometry diffractometer'
_diffrn_measurement_device_type   'Bruker D8 VENTURE Kappa Duo PHOTON 100 CMOS'
_diffrn_measurement_method        '\f and \w scans'
_diffrn_radiation_monochromator   'multilayer mirrors'
_diffrn_radiation_type            CuK\a
_diffrn_radiation_wavelength      1.54178
_diffrn_source                    'I\mS HB micro-focus sealed tube'
_diffrn_source_current            1
_diffrn_source_power              0.05
_diffrn_source_type               'Incoatech I\mS HB'
_diffrn_source_voltage            50
_diffrn_standards_number          0
_reflns_Friedel_coverage          0.704
_reflns_Friedel_fraction_full     0.999
_reflns_Friedel_fraction_max      0.962
_reflns_number_gt                 3953
_reflns_number_total              4179
_reflns_special_details
;
 Reflections were merged by SHELXL according to the crystal
 class for the calculation of statistics and refinement.
 
 _reflns_Friedel_fraction is defined as the number of unique
 Friedel pairs measured divided by the number that would be
 possible theoretically, ignoring centric projections and
 systematic absences.
;
_reflns_threshold_expression      'I > 2\s(I)'
_computing_cell_refinement        'SAINT v8.34A (Bruker-AXS, 2007)'
_computing_data_collection        'APEX2 v2014.11-0 (Bruker-AXS, 2014)'
_computing_data_reduction         'SAINT v8.34A (Bruker-AXS, 2007)'
_computing_molecular_graphics     ?
_computing_publication_material   ?
_computing_structure_refinement   'SHELXL-2014/7 (Sheldrick, 2014)'
_computing_structure_solution     'SHELXS-2013/1 (She ldrick, 2013)'
_refine_diff_density_max          0.187
_refine_diff_density_min          -0.154
_refine_diff_density_rms          0.029
_refine_ls_abs_structure_details
;
 Flack x determined using 1579 quotients [(I+)-(I-)]/[(I+)+(I-)]
 (Parsons, Flack and Wagner, Acta Cryst. B69 (2013) 249-259).
;
_refine_ls_abs_structure_Flack    0.08(9)
_refine_ls_extinction_coef        0.0031(3)
_refine_ls_extinction_expression  'Fc^*^=kFc[1+0.001xFc^2^\l^3^/sin(2\q)]^-1/4^'
_refine_ls_extinction_method      'SHELXL-2014/7 (Sheldrick 2014'
_refine_ls_goodness_of_fit_ref    1.021
_refine_ls_hydrogen_treatment     mixed
_refine_ls_matrix_type            full
_refine_ls_number_parameters      251
_refine_ls_number_reflns          4179
_refine_ls_number_restraints      0
_refine_ls_R_factor_all           0.0300
_refine_ls_R_factor_gt            0.0272
_refine_ls_restrained_S_all       1.021
_refine_ls_shift/su_max           0.000
_refine_ls_shift/su_mean          0.000
_refine_ls_structure_factor_coef  Fsqd
_refine_ls_weighting_details
'w=1/[\s^2^(Fo^2^)+(0.0314P)^2^+0.3640P] where P=(Fo^2^+2Fc^2^)/3'
_refine_ls_weighting_scheme       calc
_refine_ls_wR_factor_gt           0.0655
_refine_ls_wR_factor_ref          0.0672
_refine_special_details
;
 Refinement of F^2^ against ALL reflections.  The weighted R-factor wR and 
 goodness of fit S are based on F^2^, conventional R-factors R are based 
 on F, with F set to zero for negative F^2^. The threshold expression of 
 F^2^ > 2sigma(F^2^) is used only for calculating R-factors(gt) etc. and is 
 not relevant to the choice of reflections for refinement.  R-factors based 
 on F^2^ are statistically about twice as large as those based on F, and R- 
 factors based on ALL data will be even larger. 
;
_olex2_refinement_description
;
1. Fixed Uiso
 At 1.2 times of:
  All C(H) groups, {H11A,H11B,H1} of C11, All C(H,H) groups
 At 1.5 times of:
  {H14A,H14B,H14C} of C14, {H5A,H5B,H5C} of C5, {H4A,H4B,H4C} of C4
2.a Ternary CH refined with riding coordinates:
 C7(H7), C2(H2)
2.b Secondary CH2 refined with riding coordinates:
 C9(H9A,H9B), C6(H6A,H6B), C13(H13A,H13B), C12(H12A,H12B), C11(H11A,H11B)
2.c Aromatic/amide H refined with riding coordinates:
 C17(H17), C18(H18), C16(H16), C22(H22), C21(H21), C20(H20)
2.d Idealised Me refined as rotating group:
 C14(H14A,H14B,H14C), C4(H4A,H4B,H4C), C5(H5A,H5B,H5C)
;
_atom_sites_solution_hydrogens    mixed
_atom_sites_solution_primary      direct
_atom_sites_solution_secondary    difmap
loop_
  _atom_site_label
  _atom_site_type_symbol
  _atom_site_fract_x
  _atom_site_fract_y
  _atom_site_fract_z
  _atom_site_U_iso_or_equiv
  _atom_site_adp_type
  _atom_site_occupancy
  _atom_site_site_symmetry_order
  _atom_site_calc_flag
  _atom_site_refinement_flags_posn
  _atom_site_refinement_flags_adp
  _atom_site_refinement_flags_occupancy
  _atom_site_disorder_assembly
  _atom_site_disorder_group
 O2 O 0.1276(2) 0.75058(11) 0.26891(4) 0.0282(3) Uani 1 1 d . . . . .
 O1 O 0.85262(17) 0.48342(13) 0.38315(4) 0.0281(3) Uani 1 1 d . . . . .
 N1 N 0.69072(19) 0.50416(12) 0.45549(4) 0.0171(3) Uani 1 1 d . . . . .
 N2 N 0.60360(19) 0.52297(12) 0.54858(5) 0.0172(3) Uani 1 1 d . . . . .
 C1 C 0.6977(2) 0.47618(14) 0.40732(5) 0.0173(3) Uani 1 1 d . . . . .
 C19 C 0.9262(2) 0.62600(14) 0.56708(6) 0.0179(3) Uani 1 1 d . . . . .
 C8 C 0.4149(2) 0.48600(14) 0.29475(5) 0.0154(3) Uani 1 1 d . . . . .
 C23 C 0.7898(2) 0.56699(13) 0.53476(5) 0.0151(3) Uani 1 1 d . . . . .
 C15 C 0.8440(2) 0.55446(13) 0.48488(5) 0.0160(3) Uani 1 1 d . . . . .
 C7 C 0.4752(2) 0.39383(14) 0.33434(5) 0.0161(3) Uani 1 1 d . . . . .
 H7 H 0.6064 0.3539 0.3245 0.019 Uiso 1 1 calc R . . . .
 C2 C 0.4949(2) 0.43276(14) 0.38799(5) 0.0155(3) Uani 1 1 d . . . . .
 H2 H 0.3872 0.4950 0.3959 0.019 Uiso 1 1 calc R . . . .
 C17 C 1.1684(2) 0.64992(14) 0.50231(6) 0.0212(3) Uani 1 1 d . . . . .
 H17 H 1.2993 0.6751 0.4913 0.025 Uiso 1 1 calc R . . . .
 C18 C 1.1180(2) 0.66720(14) 0.54985(6) 0.0211(3) Uani 1 1 d . . . . .
 H18 H 1.2112 0.7066 0.5712 0.025 Uiso 1 1 calc R . . . .
 C16 C 1.0309(2) 0.59554(14) 0.46916(6) 0.0187(3) Uani 1 1 d . . . . .
 H16 H 1.0677 0.5874 0.4361 0.022 Uiso 1 1 calc R . . . .
 C3 C 0.4183(2) 0.30018(14) 0.40280(5) 0.0187(3) Uani 1 1 d . . . . .
 C22 C 0.5507(2) 0.53729(15) 0.59425(6) 0.0211(3) Uani 1 1 d . . . . .
 H22 H 0.4228 0.5051 0.6044 0.025 Uiso 1 1 calc R . . . .
 C10 C 0.1519(2) 0.64012(15) 0.26618(6) 0.0192(3) Uani 1 1 d . . . . .
 C14 C 0.5948(2) 0.57438(16) 0.28669(6) 0.0223(3) Uani 1 1 d . . . . .
 H14A H 0.6225 0.6198 0.3166 0.034 Uiso 1 1 calc GR . . . .
 H14B H 0.5607 0.6327 0.2609 0.034 Uiso 1 1 calc GR . . . .
 H14C H 0.7162 0.5270 0.2775 0.034 Uiso 1 1 calc GR . . . .
 C21 C 0.6728(3) 0.59757(16) 0.62895(6) 0.0236(3) Uani 1 1 d . . . . .
 H21 H 0.6258 0.6078 0.6612 0.028 Uiso 1 1 calc R . . . .
 C9 C 0.2231(2) 0.56188(14) 0.30826(5) 0.0178(3) Uani 1 1 d . . . . .
 H9A H 0.1121 0.5052 0.3180 0.021 Uiso 1 1 calc R . . . .
 H9B H 0.2548 0.6159 0.3361 0.021 Uiso 1 1 calc R . . . .
 C6 C 0.3268(3) 0.29071(14) 0.35108(5) 0.0195(3) Uani 1 1 d . . . . .
 H6A H 0.3511 0.2101 0.3353 0.023 Uiso 1 1 calc R . . . .
 H6B H 0.1810 0.3142 0.3492 0.023 Uiso 1 1 calc R . . . .
 C13 C 0.3699(2) 0.41200(15) 0.24844(5) 0.0187(3) Uani 1 1 d . . . . .
 H13A H 0.4948 0.3668 0.2389 0.022 Uiso 1 1 calc R . . . .
 H13B H 0.2627 0.3502 0.2556 0.022 Uiso 1 1 calc R . . . .
 C20 C 0.8601(3) 0.64099(15) 0.61529(6) 0.0216(3) Uani 1 1 d . . . . .
 H20 H 0.9454 0.6811 0.6382 0.026 Uiso 1 1 calc R . . . .
 C12 C 0.2998(2) 0.49162(17) 0.20604(5) 0.0223(3) Uani 1 1 d . . . . .
 H12A H 0.2645 0.4379 0.1783 0.027 Uiso 1 1 calc R . . . .
 H12B H 0.4127 0.5466 0.1959 0.027 Uiso 1 1 calc R . . . .
 C4 C 0.2696(3) 0.29472(16) 0.44493(6) 0.0254(4) Uani 1 1 d . . . . .
 H4A H 0.3400 0.3189 0.4747 0.038 Uiso 1 1 calc GR . . . .
 H4B H 0.2174 0.2105 0.4483 0.038 Uiso 1 1 calc GR . . . .
 H4C H 0.1557 0.3513 0.4389 0.038 Uiso 1 1 calc GR . . . .
 C5 C 0.5955(3) 0.21064(16) 0.41028(6) 0.0257(3) Uani 1 1 d . . . . .
 H5A H 0.6918 0.2181 0.3833 0.038 Uiso 1 1 calc GR . . . .
 H5B H 0.5430 0.1261 0.4117 0.038 Uiso 1 1 calc GR . . . .
 H5C H 0.6654 0.2302 0.4406 0.038 Uiso 1 1 calc GR . . . .
 C11 C 0.1133(3) 0.56974(17) 0.21995(6) 0.0240(3) Uani 1 1 d . . . . .
 H11A H 0.0825 0.6286 0.1936 0.029 Uiso 1 1 calc R . . . .
 H11B H -0.0067 0.5153 0.2242 0.029 Uiso 1 1 calc R . . . .
 H1 H 0.576(3) 0.490(2) 0.4724(7) 0.029 Uiso 1 1 d R . . . .

loop_
  _atom_site_aniso_label
  _atom_site_aniso_U_11
  _atom_site_aniso_U_22
  _atom_site_aniso_U_33
  _atom_site_aniso_U_23
  _atom_site_aniso_U_13
  _atom_site_aniso_U_12
 O2 0.0361(7) 0.0220(6) 0.0266(6) -0.0003(5) -0.0029(5) 0.0082(5)
 O1 0.0188(5) 0.0474(8) 0.0183(5) -0.0034(5) 0.0041(4) -0.0017(6)
 N1 0.0151(6) 0.0205(6) 0.0156(6) -0.0024(5) 0.0027(5) -0.0031(5)
 N2 0.0178(6) 0.0168(6) 0.0169(6) 0.0010(5) 0.0011(5) 0.0005(5)
 C1 0.0196(7) 0.0165(7) 0.0159(7) 0.0006(6) 0.0018(6) 0.0019(6)
 C19 0.0202(7) 0.0124(7) 0.0209(7) 0.0015(6) -0.0062(6) 0.0019(6)
 C8 0.0166(7) 0.0157(7) 0.0139(6) 0.0007(6) 0.0015(5) 0.0001(6)
 C23 0.0165(7) 0.0117(6) 0.0170(7) 0.0008(5) -0.0014(6) 0.0018(5)
 C15 0.0169(7) 0.0132(6) 0.0179(7) 0.0001(5) -0.0010(6) 0.0015(5)
 C7 0.0193(7) 0.0153(7) 0.0139(7) -0.0004(6) 0.0012(6) 0.0008(6)
 C2 0.0179(7) 0.0148(7) 0.0140(6) 0.0002(5) 0.0027(5) 0.0002(6)
 C17 0.0145(7) 0.0163(7) 0.0329(9) 0.0047(6) -0.0008(6) -0.0013(6)
 C18 0.0198(7) 0.0159(7) 0.0276(8) 0.0015(6) -0.0088(6) -0.0015(6)
 C16 0.0185(7) 0.0160(7) 0.0217(7) 0.0015(6) 0.0023(6) 0.0023(6)
 C3 0.0256(7) 0.0144(7) 0.0161(7) 0.0008(6) 0.0034(6) -0.0018(6)
 C22 0.0226(7) 0.0229(8) 0.0180(7) 0.0017(6) 0.0014(6) 0.0001(6)
 C10 0.0163(7) 0.0224(8) 0.0187(7) -0.0010(6) 0.0018(6) 0.0036(6)
 C14 0.0192(7) 0.0226(8) 0.0251(8) 0.0060(7) -0.0005(6) -0.0032(7)
 C21 0.0317(9) 0.0244(8) 0.0148(7) -0.0004(6) -0.0005(6) 0.0019(7)
 C9 0.0201(7) 0.0181(7) 0.0151(7) -0.0012(6) 0.0015(6) 0.0013(6)
 C6 0.0254(8) 0.0145(7) 0.0187(7) -0.0009(6) 0.0008(6) -0.0032(6)
 C13 0.0208(8) 0.0204(7) 0.0148(7) -0.0024(6) 0.0024(6) 0.0031(6)
 C20 0.0286(8) 0.0171(7) 0.0190(7) -0.0009(6) -0.0080(7) 0.0015(7)
 C12 0.0235(8) 0.0288(8) 0.0147(7) -0.0033(6) 0.0005(6) 0.0066(7)
 C4 0.0345(9) 0.0205(8) 0.0214(8) 0.0011(7) 0.0078(7) -0.0064(7)
 C5 0.0361(9) 0.0185(7) 0.0224(8) 0.0027(6) 0.0002(7) 0.0038(7)
 C11 0.0236(8) 0.0302(8) 0.0183(7) -0.0033(7) -0.0028(6) 0.0075(7)

_geom_special_details
;
 All esds (except the esd in the dihedral angle between two l.s. planes)
 are estimated using the full covariance matrix.  The cell esds are taken
 into account individually in the estimation of esds in distances, angles
 and torsion angles; correlations between esds in cell parameters are only
 used when they are defined by crystal symmetry.  An approximate (isotropic)
 treatment of cell esds is used for estimating esds involving l.s. planes.
;
loop_
  _geom_bond_atom_site_label_1
  _geom_bond_atom_site_label_2
  _geom_bond_distance
  _geom_bond_site_symmetry_2
  _geom_bond_publ_flag
 O2 C10 1.211(2) . ?
 O1 C1 1.2176(18) . ?
 N1 C1 1.3676(19) . ?
 N1 C15 1.402(2) . ?
 N1 H1 0.90(2) . ?
 N2 C23 1.364(2) . ?
 N2 C22 1.319(2) . ?
 C1 C2 1.507(2) . ?
 C19 C23 1.417(2) . ?
 C19 C18 1.416(2) . ?
 C19 C20 1.412(2) . ?
 C8 C7 1.534(2) . ?
 C8 C14 1.535(2) . ?
 C8 C9 1.548(2) . ?
 C8 C13 1.540(2) . ?
 C23 C15 1.431(2) . ?
 C15 C16 1.373(2) . ?
 C7 H7 1.0000 . ?
 C7 C2 1.5486(19) . ?
 C7 C6 1.552(2) . ?
 C2 H2 1.0000 . ?
 C2 C3 1.577(2) . ?
 C17 H17 0.9500 . ?
 C17 C18 1.369(2) . ?
 C17 C16 1.414(2) . ?
 C18 H18 0.9500 . ?
 C16 H16 0.9500 . ?
 C3 C6 1.555(2) . ?
 C3 C4 1.520(2) . ?
 C3 C5 1.527(2) . ?
 C22 H22 0.9500 . ?
 C22 C21 1.410(2) . ?
 C10 C9 1.514(2) . ?
 C10 C11 1.511(2) . ?
 C14 H14A 0.9800 . ?
 C14 H14B 0.9800 . ?
 C14 H14C 0.9800 . ?
 C21 H21 0.9500 . ?
 C21 C20 1.367(2) . ?
 C9 H9A 0.9900 . ?
 C9 H9B 0.9900 . ?
 C6 H6A 0.9900 . ?
 C6 H6B 0.9900 . ?
 C13 H13A 0.9900 . ?
 C13 H13B 0.9900 . ?
 C13 C12 1.527(2) . ?
 C20 H20 0.9500 . ?
 C12 H12A 0.9900 . ?
 C12 H12B 0.9900 . ?
 C12 C11 1.535(2) . ?
 C4 H4A 0.9800 . ?
 C4 H4B 0.9800 . ?
 C4 H4C 0.9800 . ?
 C5 H5A 0.9800 . ?
 C5 H5B 0.9800 . ?
 C5 H5C 0.9800 . ?
 C11 H11A 0.9900 . ?
 C11 H11B 0.9900 . ?

loop_
  _geom_angle_atom_site_label_1
  _geom_angle_atom_site_label_2
  _geom_angle_atom_site_label_3
  _geom_angle
  _geom_angle_site_symmetry_1
  _geom_angle_site_symmetry_3
  _geom_angle_publ_flag
 C1 N1 C15 128.85(13) . . ?
 C1 N1 H1 119.7(13) . . ?
 C15 N1 H1 111.4(13) . . ?
 C22 N2 C23 117.51(13) . . ?
 O1 C1 N1 123.29(14) . . ?
 O1 C1 C2 124.01(13) . . ?
 N1 C1 C2 112.68(12) . . ?
 C18 C19 C23 119.31(14) . . ?
 C20 C19 C23 117.04(14) . . ?
 C20 C19 C18 123.65(15) . . ?
 C7 C8 C14 108.23(12) . . ?
 C7 C8 C9 112.51(12) . . ?
 C7 C8 C13 107.68(12) . . ?
 C14 C8 C9 109.05(13) . . ?
 C14 C8 C13 110.57(12) . . ?
 C13 C8 C9 108.79(12) . . ?
 N2 C23 C19 123.01(13) . . ?
 N2 C23 C15 117.29(13) . . ?
 C19 C23 C15 119.68(14) . . ?
 N1 C15 C23 114.75(13) . . ?
 C16 C15 N1 125.50(14) . . ?
 C16 C15 C23 119.69(14) . . ?
 C8 C7 H7 107.9 . . ?
 C8 C7 C2 121.88(12) . . ?
 C8 C7 C6 121.41(13) . . ?
 C2 C7 H7 107.9 . . ?
 C2 C7 C6 87.86(11) . . ?
 C6 C7 H7 107.9 . . ?
 C1 C2 C7 119.93(12) . . ?
 C1 C2 H2 109.5 . . ?
 C1 C2 C3 118.23(13) . . ?
 C7 C2 H2 109.5 . . ?
 C7 C2 C3 88.51(11) . . ?
 C3 C2 H2 109.5 . . ?
 C18 C17 H17 119.1 . . ?
 C18 C17 C16 121.76(15) . . ?
 C16 C17 H17 119.1 . . ?
 C19 C18 H18 120.2 . . ?
 C17 C18 C19 119.62(15) . . ?
 C17 C18 H18 120.2 . . ?
 C15 C16 C17 119.85(14) . . ?
 C15 C16 H16 120.1 . . ?
 C17 C16 H16 120.1 . . ?
 C6 C3 C2 86.77(11) . . ?
 C4 C3 C2 116.02(12) . . ?
 C4 C3 C6 117.16(14) . . ?
 C4 C3 C5 110.98(13) . . ?
 C5 C3 C2 111.89(13) . . ?
 C5 C3 C6 112.06(13) . . ?
 N2 C22 H22 118.0 . . ?
 N2 C22 C21 123.90(15) . . ?
 C21 C22 H22 118.0 . . ?
 O2 C10 C9 123.15(15) . . ?
 O2 C10 C11 122.04(15) . . ?
 C11 C10 C9 114.80(14) . . ?
 C8 C14 H14A 109.5 . . ?
 C8 C14 H14B 109.5 . . ?
 C8 C14 H14C 109.5 . . ?
 H14A C14 H14B 109.5 . . ?
 H14A C14 H14C 109.5 . . ?
 H14B C14 H14C 109.5 . . ?
 C22 C21 H21 120.7 . . ?
 C20 C21 C22 118.69(15) . . ?
 C20 C21 H21 120.7 . . ?
 C8 C9 H9A 109.4 . . ?
 C8 C9 H9B 109.4 . . ?
 C10 C9 C8 111.24(12) . . ?
 C10 C9 H9A 109.4 . . ?
 C10 C9 H9B 109.4 . . ?
 H9A C9 H9B 108.0 . . ?
 C7 C6 C3 89.19(11) . . ?
 C7 C6 H6A 113.8 . . ?
 C7 C6 H6B 113.8 . . ?
 C3 C6 H6A 113.8 . . ?
 C3 C6 H6B 113.8 . . ?
 H6A C6 H6B 111.0 . . ?
 C8 C13 H13A 108.8 . . ?
 C8 C13 H13B 108.8 . . ?
 H13A C13 H13B 107.7 . . ?
 C12 C13 C8 113.71(13) . . ?
 C12 C13 H13A 108.8 . . ?
 C12 C13 H13B 108.8 . . ?
 C19 C20 H20 120.1 . . ?
 C21 C20 C19 119.80(15) . . ?
 C21 C20 H20 120.1 . . ?
 C13 C12 H12A 109.4 . . ?
 C13 C12 H12B 109.4 . . ?
 C13 C12 C11 111.00(13) . . ?
 H12A C12 H12B 108.0 . . ?
 C11 C12 H12A 109.4 . . ?
 C11 C12 H12B 109.4 . . ?
 C3 C4 H4A 109.5 . . ?
 C3 C4 H4B 109.5 . . ?
 C3 C4 H4C 109.5 . . ?
 H4A C4 H4B 109.5 . . ?
 H4A C4 H4C 109.5 . . ?
 H4B C4 H4C 109.5 . . ?
 C3 C5 H5A 109.5 . . ?
 C3 C5 H5B 109.5 . . ?
 C3 C5 H5C 109.5 . . ?
 H5A C5 H5B 109.5 . . ?
 H5A C5 H5C 109.5 . . ?
 H5B C5 H5C 109.5 . . ?
 C10 C11 C12 110.96(13) . . ?
 C10 C11 H11A 109.4 . . ?
 C10 C11 H11B 109.4 . . ?
 C12 C11 H11A 109.4 . . ?
 C12 C11 H11B 109.4 . . ?
 H11A C11 H11B 108.0 . . ?

loop_
  _geom_torsion_atom_site_label_1
  _geom_torsion_atom_site_label_2
  _geom_torsion_atom_site_label_3
  _geom_torsion_atom_site_label_4
  _geom_torsion
  _geom_torsion_site_symmetry_1
  _geom_torsion_site_symmetry_2
  _geom_torsion_site_symmetry_3
  _geom_torsion_site_symmetry_4
  _geom_torsion_publ_flag
 O2 C10 C9 C8 -125.20(17) . . . . ?
 O2 C10 C11 C12 127.00(17) . . . . ?
 O1 C1 C2 C7 0.1(2) . . . . ?
 O1 C1 C2 C3 106.07(18) . . . . ?
 N1 C1 C2 C7 -178.49(13) . . . . ?
 N1 C1 C2 C3 -72.53(17) . . . . ?
 N1 C15 C16 C17 176.96(14) . . . . ?
 N2 C23 C15 N1 3.66(19) . . . . ?
 N2 C23 C15 C16 -179.03(13) . . . . ?
 N2 C22 C21 C20 -2.0(3) . . . . ?
 C1 N1 C15 C23 -177.11(14) . . . . ?
 C1 N1 C15 C16 5.8(3) . . . . ?
 C1 C2 C3 C6 -144.20(13) . . . . ?
 C1 C2 C3 C4 97.03(17) . . . . ?
 C1 C2 C3 C5 -31.70(18) . . . . ?
 C19 C23 C15 N1 -174.83(13) . . . . ?
 C19 C23 C15 C16 2.5(2) . . . . ?
 C8 C7 C2 C1 -91.02(17) . . . . ?
 C8 C7 C2 C3 146.90(14) . . . . ?
 C8 C7 C6 C3 -147.60(13) . . . . ?
 C8 C13 C12 C11 -55.22(18) . . . . ?
 C23 N2 C22 C21 1.6(2) . . . . ?
 C23 C19 C18 C17 0.3(2) . . . . ?
 C23 C19 C20 C21 0.9(2) . . . . ?
 C23 C15 C16 C17 0.0(2) . . . . ?
 C15 N1 C1 O1 6.0(3) . . . . ?
 C15 N1 C1 C2 -175.39(14) . . . . ?
 C7 C8 C9 C10 -172.85(13) . . . . ?
 C7 C8 C13 C12 177.89(13) . . . . ?
 C7 C2 C3 C6 -20.67(11) . . . . ?
 C7 C2 C3 C4 -139.44(14) . . . . ?
 C7 C2 C3 C5 91.84(14) . . . . ?
 C2 C7 C6 C3 -20.99(11) . . . . ?
 C2 C3 C6 C7 20.61(11) . . . . ?
 C18 C19 C23 N2 179.01(14) . . . . ?
 C18 C19 C23 C15 -2.6(2) . . . . ?
 C18 C19 C20 C21 -179.54(15) . . . . ?
 C18 C17 C16 C15 -2.4(2) . . . . ?
 C16 C17 C18 C19 2.3(2) . . . . ?
 C22 N2 C23 C19 0.2(2) . . . . ?
 C22 N2 C23 C15 -178.22(14) . . . . ?
 C22 C21 C20 C19 0.7(2) . . . . ?
 C14 C8 C7 C2 71.18(17) . . . . ?
 C14 C8 C7 C6 -179.66(13) . . . . ?
 C14 C8 C9 C10 67.06(16) . . . . ?
 C14 C8 C13 C12 -64.05(17) . . . . ?
 C9 C8 C7 C2 -49.38(18) . . . . ?
 C9 C8 C7 C6 59.77(18) . . . . ?
 C9 C8 C13 C12 55.69(16) . . . . ?
 C9 C10 C11 C12 -52.89(19) . . . . ?
 C6 C7 C2 C1 142.76(14) . . . . ?
 C6 C7 C2 C3 20.68(11) . . . . ?
 C13 C8 C7 C2 -169.26(13) . . . . ?
 C13 C8 C7 C6 -60.10(17) . . . . ?
 C13 C8 C9 C10 -53.62(16) . . . . ?
 C13 C12 C11 C10 51.44(19) . . . . ?
 C20 C19 C23 N2 -1.4(2) . . . . ?
 C20 C19 C23 C15 176.96(13) . . . . ?
 C20 C19 C18 C17 -179.26(15) . . . . ?
 C4 C3 C6 C7 138.32(14) . . . . ?
 C5 C3 C6 C7 -91.73(14) . . . . ?
 C11 C10 C9 C8 54.70(18) . . . . ?

_shelx_res_file
;
    p16026_a.res created by SHELXL-2014/7

TITL p16026_a.res in P2(1)2(1)2(1)
REM Old TITL p16026 in P2(1)2(1)2(1)
REM SHELXT solution in P2(1)2(1)2(1)
REM R1 0.093, Rweak 0.023, Alpha 0.001, Orientation as input
REM Flack x = 0.049 ( 0.085 ) from Parsons' quotients
REM Formula found by SHELXT: C23 N2 O2
CELL 1.54178 6.5496 10.8428 27.6666 90 90 90
ZERR 4 0.0004 0.0006 0.0015 0 0 0
LATT -1
SYMM 0.5-X,-Y,0.5+Z
SYMM -X,0.5+Y,0.5-Z
SYMM 0.5+X,0.5-Y,-Z
SFAC C H N O
UNIT 92 112 8 8

L.S. 20
PLAN  18
SIZE 0.1 0.15 0.25
TEMP -173.15
BOND $H
LIST 6
MORE -1
CONF
fmap 2
acta
REM <olex2.extras>
REM <HklSrc "%.\\p16026_a.hkl">
REM </olex2.extras>

WGHT    0.031400    0.364000
EXTI    0.003075
FVAR       0.77867
O2    4    0.127586    0.750583    0.268915    11.00000    0.03613    0.02197 =
         0.02661   -0.00033   -0.00290    0.00817
O1    4    0.852618    0.483417    0.383154    11.00000    0.01877    0.04738 =
         0.01827   -0.00335    0.00413   -0.00174
N1    3    0.690721    0.504161    0.455494    11.00000    0.01511    0.02051 =
         0.01564   -0.00240    0.00269   -0.00307
N2    3    0.603604    0.522975    0.548577    11.00000    0.01780    0.01682 =
         0.01694    0.00097    0.00108    0.00050
C1    1    0.697729    0.476178    0.407324    11.00000    0.01958    0.01646 =
         0.01588    0.00059    0.00182    0.00186
C19   1    0.926238    0.625997    0.567078    11.00000    0.02025    0.01241 =
         0.02095    0.00149   -0.00622    0.00187
C8    1    0.414935    0.486003    0.294752    11.00000    0.01659    0.01565 =
         0.01394    0.00074    0.00155    0.00013
C23   1    0.789829    0.566986    0.534758    11.00000    0.01647    0.01173 =
         0.01702    0.00084   -0.00143    0.00179
C15   1    0.843960    0.554459    0.484876    11.00000    0.01688    0.01320 =
         0.01793    0.00008   -0.00096    0.00151
C7    1    0.475204    0.393830    0.334336    11.00000    0.01925    0.01526 =
         0.01385   -0.00036    0.00124    0.00079
AFIX  13
H7    2    0.606401    0.353941    0.324467    11.00000   -1.20000
AFIX   0
C2    1    0.494938    0.432761    0.387987    11.00000    0.01785    0.01479 =
         0.01398    0.00017    0.00274    0.00018
AFIX  13
H2    2    0.387225    0.494962    0.395858    11.00000   -1.20000
AFIX   0
C17   1    1.168430    0.649919    0.502306    11.00000    0.01455    0.01626 =
         0.03289    0.00465   -0.00077   -0.00130
AFIX  43
H17   2    1.299309    0.675131    0.491285    11.00000   -1.20000
AFIX   0
C18   1    1.118002    0.667203    0.549855    11.00000    0.01982    0.01591 =
         0.02763    0.00154   -0.00878   -0.00148
AFIX  43
H18   2    1.211159    0.706618    0.571164    11.00000   -1.20000
AFIX   0
C16   1    1.030882    0.595538    0.469162    11.00000    0.01848    0.01597 =
         0.02172    0.00152    0.00233    0.00232
AFIX  43
H16   2    1.067703    0.587441    0.436102    11.00000   -1.20000
AFIX   0
C3    1    0.418298    0.300175    0.402796    11.00000    0.02564    0.01442 =
         0.01608    0.00078    0.00336   -0.00179
C22   1    0.550729    0.537290    0.594247    11.00000    0.02258    0.02286 =
         0.01800    0.00167    0.00142    0.00015
AFIX  43
H22   2    0.422786    0.505065    0.604355    11.00000   -1.20000
AFIX   0
C10   1    0.151929    0.640123    0.266181    11.00000    0.01634    0.02243 =
         0.01871   -0.00096    0.00176    0.00357
C14   1    0.594838    0.574378    0.286693    11.00000    0.01925    0.02263 =
         0.02515    0.00604   -0.00046   -0.00323
AFIX 137
H14A  2    0.622529    0.619830    0.316600    11.00000   -1.50000
H14B  2    0.560658    0.632695    0.260869    11.00000   -1.50000
H14C  2    0.716183    0.527029    0.277464    11.00000   -1.50000
AFIX   0
C21   1    0.672793    0.597566    0.628946    11.00000    0.03168    0.02442 =
         0.01480   -0.00039   -0.00047    0.00186
AFIX  43
H21   2    0.625827    0.607803    0.661185    11.00000   -1.20000
AFIX   0
C9    1    0.223100    0.561879    0.308256    11.00000    0.02014    0.01814 =
         0.01508   -0.00117    0.00149    0.00131
AFIX  23
H9A   2    0.112080    0.505151    0.318023    11.00000   -1.20000
H9B   2    0.254832    0.615874    0.336116    11.00000   -1.20000
AFIX   0
C6    1    0.326839    0.290714    0.351075    11.00000    0.02540    0.01446 =
         0.01868   -0.00086    0.00079   -0.00317
AFIX  23
H6A   2    0.351116    0.210139    0.335256    11.00000   -1.20000
H6B   2    0.180982    0.314188    0.349193    11.00000   -1.20000
AFIX   0
C13   1    0.369877    0.412005    0.248443    11.00000    0.02082    0.02041 =
         0.01480   -0.00243    0.00236    0.00307
AFIX  23
H13A  2    0.494780    0.366771    0.238858    11.00000   -1.20000
H13B  2    0.262745    0.350216    0.255574    11.00000   -1.20000
AFIX   0
C20   1    0.860055    0.640986    0.615286    11.00000    0.02864    0.01710 =
         0.01900   -0.00091   -0.00797    0.00155
AFIX  43
H20   2    0.945400    0.681127    0.638164    11.00000   -1.20000
AFIX   0
C12   1    0.299798    0.491618    0.206036    11.00000    0.02349    0.02880 =
         0.01471   -0.00333    0.00047    0.00662
AFIX  23
H12A  2    0.264511    0.437933    0.178324    11.00000   -1.20000
H12B  2    0.412690    0.546586    0.195931    11.00000   -1.20000
AFIX   0
C4    1    0.269641    0.294719    0.444933    11.00000    0.03446    0.02045 =
         0.02140    0.00113    0.00782   -0.00639
AFIX 137
H4A   2    0.340007    0.318905    0.474722    11.00000   -1.50000
H4B   2    0.217371    0.210473    0.448319    11.00000   -1.50000
H4C   2    0.155702    0.351263    0.438926    11.00000   -1.50000
AFIX   0
C5    1    0.595482    0.210640    0.410275    11.00000    0.03609    0.01847 =
         0.02243    0.00273    0.00017    0.00379
AFIX 137
H5A   2    0.691791    0.218135    0.383326    11.00000   -1.50000
H5B   2    0.542962    0.126082    0.411664    11.00000   -1.50000
H5C   2    0.665399    0.230244    0.440635    11.00000   -1.50000
AFIX   0
C11   1    0.113319    0.569738    0.219946    11.00000    0.02357    0.03016 =
         0.01829   -0.00332   -0.00278    0.00751
AFIX  23
H11A  2    0.082475    0.628551    0.193567    11.00000   -1.20000
H11B  2   -0.006724    0.515332    0.224214    11.00000   -1.20000
AFIX   0
H1    2    0.575686    0.489922    0.472387    11.00000   -1.20000
HKLF 4

REM  p16026_a.res in P2(1)2(1)2(1)
REM R1 =  0.0272 for    3953 Fo > 4sig(Fo)  and  0.0300 for all    4179 data
REM    251 parameters refined using      0 restraints

END

WGHT      0.0313      0.3642

REM Highest difference peak  0.187,  deepest hole -0.154,  1-sigma level  0.029
Q1    1   0.3911  0.4544  0.2732  11.00000  0.05    0.19
Q2    1   0.4390  0.4434  0.3146  11.00000  0.05    0.18
Q3    1   0.5938  0.4580  0.3977  11.00000  0.05    0.17
Q4    1   0.4955  0.4246  0.3607  11.00000  0.05    0.16
Q5    1   0.1963  0.5315  0.2139  11.00000  0.05    0.16
Q6    1   0.8081  0.5737  0.5098  11.00000  0.05    0.15
Q7    1   0.3105  0.4645  0.2324  11.00000  0.05    0.15
Q8    1   0.3634  0.2911  0.3798  11.00000  0.05    0.15
Q9    1   0.3693  0.3068  0.4274  11.00000  0.05    0.15
Q10   1   0.3056  0.5172  0.2979  11.00000  0.05    0.15
Q11   1   0.4618  0.3700  0.4036  11.00000  0.05    0.14
Q12   1   0.4990  0.5266  0.2901  11.00000  0.05    0.14
Q13   1   0.8650  0.6058  0.5487  11.00000  0.05    0.14
Q14   1   0.4036  0.3421  0.3359  11.00000  0.05    0.14
Q15   1   0.1297  0.5993  0.2428  11.00000  0.05    0.13
Q16   1   0.1962  0.6003  0.2881  11.00000  0.05    0.13
Q17   1   0.6393  0.5383  0.6124  11.00000  0.05    0.13
Q18   1   0.9220  0.6062  0.4748  11.00000  0.05    0.12
;
_shelx_res_checksum               84014
_shelx_hkl_file
;
  -1   0   0   -1.90    1.70
   1   0   0    3.90    2.00
   1   0   0    4.30    1.90
  -1   0   0   -0.50    1.70
   2   0   0  643.54   25.00
   2   0   0  623.04   22.10
  -2   0   0  622.44   21.50
   2   0   0  671.13   26.10
  -2   0   0  670.73   25.60
  -2   0   0  620.74   25.40
   3   0   0    0.30    3.10
   3   0   0   -5.80   11.40
   3   0   0    5.20    7.00
  -3   0   0    1.90    2.00
  -3   0   0   -3.80    7.80
  -4   0   0 2818.22   86.79
   4   0   0 2669.13   88.29
   4   0   0 2563.94   97.79
   4   0   0 2588.74   85.69
   5   0   0   -1.50    6.60
  -5   0   0    5.20    4.20
  -5   0   0   -1.00    3.10
   5   0   0    1.20    3.40
   5   0   0    1.40    2.10
   5   0   0   -6.10    3.90
   6   0   0   77.19    7.00
  -6   0   0   82.49    7.70
   6   0   0   74.19    6.10
   6   0   0   77.39    5.60
   6   0   0  100.09   14.80
   7   0   0   -0.70    2.80
  -7   0   0   -5.30    3.00
   7   0   0   -0.60    2.60
   8   0   0    6.00    3.10
  -8   0   0    1.70    2.00
   0  -1   0   -0.70    0.80
   0   1   0    0.70    0.80
   1   1   0  398.96   15.00
  -1  -1   0  369.76   15.00
   1   1   0  378.06   15.30
   1  -1   0  387.86   14.40
  -1   1   0  364.66   12.70
  -1  -1   0  415.16   15.40
   2   1   0 4974.10  157.28
  -2  -1   0 4773.42  157.58
  -2  -1   0 5035.00  157.78
   2   1   0 4770.82  153.58
   2   1   0 4678.83  157.68
  -2   1   0 4387.76  152.78
   2  -1   0 5090.49  156.68
  -2   1   0 5111.49  156.88
   2  -1   0 4792.22  156.78
  -2  -1   0 4474.55  153.28
   3   1   0   -1.40    3.00
  -3   1   0   11.70    8.30
   3  -1   0   -6.00   11.50
   3   1   0    7.40   13.80
   3   1   0    2.60    6.80
  -3   1   0    0.20    1.60
  -3  -1   0    7.20    8.30
  -3  -1   0    0.90    2.20
   3  -1   0    1.30    4.20
   3  -1   0   -3.80    6.80
   4  -1   0   32.40   15.20
  -4  -1   0   38.20    5.20
   4   1   0   38.10    3.80
  -4   1   0   35.10    4.20
   4  -1   0   39.10    3.80
   4   1   0   47.70    7.20
   4   1   0   39.80   15.70
   4  -1   0   38.60    6.60
   5   1   0  180.68   12.60
  -5  -1   0  182.28   10.80
  -5  -1   0  161.28   10.90
   5  -1   0  189.58   10.30
   5  -1   0  177.48    8.10
   5   1   0  169.88    9.80
   5   1   0  187.68    9.10
   5   1   0  179.88    8.10
  -5   1   0  185.48    7.50
  -5   1   0  173.78   10.10
  -5  -1   0  182.88    9.80
   5  -1   0  173.18    9.50
   6   1   0   17.50    4.00
   6  -1   0   -1.60   11.20
  -6  -1   0   17.80    4.40
   6  -1   0   14.90    3.40
  -6  -1   0   18.60    4.50
   6   1   0   23.50    7.70
   6  -1   0   16.30    3.00
   6  -1   0   11.00    3.80
   6   1   0   10.50    2.90
  -6   1   0    5.20    3.80
   6   1   0    9.60    2.90
  -7   1   0   26.70    3.90
   7   1   0   34.80    4.10
  -7  -1   0   27.90    4.20
   7  -1   0   32.70    5.00
   7  -1   0   38.50    4.50
   7   1   0   10.80   11.00
   7   1   0   24.60    3.90
  -8   1   0   29.40    3.60
   8  -1   0   36.00    3.50
   8   1   0   39.10    3.80
   8  -1   0   28.60    3.70
  -8  -1   0   29.50    3.80
   0   2   0 8511.35  297.37
   0  -2   0 9710.23  299.17
   0   2   0 9999.00  299.07
   1   2   0 7800.42  235.18
   1  -2   0 7778.82  234.28
  -1   2   0 6859.51  231.78
   1   2   0 7534.55  235.68
   1   2   0 7289.47  232.58
  -1   2   0 7066.69  233.78
  -1  -2   0 6989.90  236.58
   2   2   0   -8.60    7.60
  -2  -2   0    1.20    2.20
   2  -2   0    1.30    4.60
  -2   2   0   -0.30    1.00
   2  -2   0   -4.10    3.70
   2   2   0    2.00    4.30
   2   2   0    0.20    1.80
  -2  -2   0   -8.50    7.20
  -3  -2   0  382.96   15.00
   3  -2   0  418.16   27.10
  -3   2   0  391.16   13.40
   3  -2   0  430.16   21.70
   3  -2   0  354.96   17.00
   3   2   0  393.36   15.30
  -3   2   0  357.36   22.50
   3   2   0  389.36   22.40
   4  -2   0   20.80    2.80
   4   2   0   18.30    4.50
   4  -2   0   42.80   15.20
  -4  -2   0   15.50    4.10
   4  -2   0   20.10    8.10
   4   2   0   22.90    3.60
   4   2   0   -7.60   17.00
  -4   2   0   22.90    2.60
  -5  -2   0  134.29    9.10
   5  -2   0  124.79    8.50
   5  -2   0  147.19    9.20
  -5   2   0  128.89    8.60
   5  -2   0  135.69    6.80
   5   2   0  142.99    7.60
  -5  -2   0  116.79    9.30
   5   2   0  129.09   10.70
   5   2   0  134.09    8.40
  -5  -2   0  130.69    9.20
   5   2   0  137.49    6.80
   6   2   0   27.80    4.50
   6  -2   0   25.80    4.30
  -6   2   0   17.10    4.20
   6   2   0   11.90    7.30
   6  -2   0   32.80    4.40
  -6  -2   0   30.60    5.30
   6   2   0   35.60    5.10
  -6  -2   0   23.30    5.30
  -6  -2   0   18.20    4.70
  -7  -2   0   64.89    6.40
   7   2   0   61.69    5.40
  -7   2   0   55.79    5.50
   7  -2   0   52.19    4.70
   7  -2   0   60.79    5.60
   8  -2   0   29.60    3.50
  -8  -2   0   31.20    3.50
   8   2   0   30.90    3.20
   8  -2   0   30.70    3.20
   0   3   0    6.30    3.00
   0  -3   0   -2.00    3.00
   0   3   0    0.60    2.50
   0   3   0   -1.10    0.80
   1  -3   0 6275.07  199.58
  -1  -3   0 6391.26  201.28
   1   3   0 5792.52  197.08
  -1  -3   0 5947.50  197.68
   1   3   0 6298.17  201.58
  -1   3   0 6239.98  199.08
   1  -3   0 6085.59  199.18
   1   3   0 6652.83  200.88
  -2  -3   0  811.42   28.10
   2   3   0  820.92   27.70
  -2   3   0  818.02   31.10
   2   3   0  773.22   36.60
  -2  -3   0  793.92   36.90
   2  -3   0  834.92   32.00
   2   3   0  814.22   32.70
   2  -3   0  829.82   30.90
   3  -3   0   37.10   15.00
   3   3   0   46.40    5.00
  -3  -3   0   49.90    5.60
   3   3   0   51.79   11.20
  -3  -3   0   56.79    4.50
   4   3   0  347.57   13.80
  -4  -3   0  355.66   15.40
  -4  -3   0  317.77   17.40
   4   3   0  390.06   35.10
   4  -3   0  349.17   13.00
   4  -3   0  329.97   33.30
   4   3   0  374.06   15.50
  -4  -3   0  350.56   15.00
  -4  -3   0  348.77   14.10
   4   3   0  340.87   12.90
  -4   3   0  337.17   14.70
  -4  -3   0  353.76   13.30
  -5  -3   0  212.38   12.10
   5  -3   0  225.88   10.90
   5   3   0  207.88    9.30
   5  -3   0  223.18    9.40
  -5   3   0  224.28   14.20
   5   3   0  218.38   12.90
   5   3   0  212.08   10.00
   5  -3   0  224.98   11.40
  -5  -3   0  194.38   10.90
  -5  -3   0  196.68   13.10
  -5  -3   0  216.38   11.00
   6   3   0    3.60    3.40
  -6  -3   0    0.70    8.20
   6   3   0    5.90    6.90
   6  -3   0   -0.80    2.60
  -6   3   0   -1.10    3.20
   6  -3   0    2.30    3.50
  -6  -3   0    9.30    3.90
  -7  -3   0   66.39    6.50
   7  -3   0   75.09    5.60
   7   3   0   70.59    5.40
  -7   3   0   78.19    5.60
   7  -3   0   68.09    4.80
   8  -3   0   16.70    2.80
  -8  -3   0   11.60    2.40
   8  -3   0   13.70    2.10
   0   4   0  703.93   22.90
   0   4   0  743.53   26.90
   0  -4   0  704.13   27.80
   0   4   0  707.83   27.10
   1   4   0    0.90    4.50
  -1  -4   0   -1.30    7.20
   1   4   0    1.30    1.30
   1  -4   0    4.50    5.10
   1  -4   0    6.70    5.00
  -1   4   0   -2.00    4.50
  -1  -4   0    4.40    3.90
   2  -4   0  841.32   31.70
   2  -4   0  822.82   33.10
  -2   4   0  801.12   32.20
   2  -4   0  748.93   33.20
   2   4   0  811.32   27.50
   2   4   0  807.92   34.00
   3   4   0  185.68   21.80
   3  -4   0  157.78    7.80
   3  -4   0  131.09   18.70
   3   4   0  172.98    8.50
  -3  -4   0  167.18    7.40
  -3  -4   0  161.48    9.50
   4   4   0   17.90   26.10
   4   4   0   45.10    6.10
  -4  -4   0   55.29    9.40
  -4  -4   0   47.70    6.90
  -4  -4   0   54.59    4.90
   4  -4   0   42.20    6.80
   4  -4   0   53.79    4.40
  -4  -4   0   46.10    6.90
   4  -4   0   54.99   38.40
   4   4   0   65.59    7.60
   4   4   0   53.19    6.20
  -4  -4   0   48.80    6.10
  -4   4   0   53.69    7.20
  -5  -4   0  292.47   13.40
   5   4   0  294.97   13.10
   5   4   0  292.37   14.80
  -5  -4   0  282.17   15.20
  -5  -4   0  295.07   15.00
   5  -4   0  290.47   13.80
  -5  -4   0  302.77   12.30
  -5   4   0  292.97   13.00
   5  -4   0  318.07   12.00
  -6   4   0   61.89    6.20
   6  -4   0   54.29    6.40
   6  -4   0   54.29    4.90
  -6  -4   0   56.09    7.10
  -6  -4   0   65.49    8.00
   6   4   0   67.19    9.90
   6   4   0   54.99    6.00
  -6  -4   0   55.09    6.40
   7   4   0   -1.00    2.30
  -7  -4   0    0.80    3.20
  -7   4   0   -2.10    2.70
   7  -4   0    0.10    2.60
   7  -4   0   -0.80    2.10
   0   5   0    3.80    6.90
   1   5   0  215.68   16.10
   1   5   0  232.98   18.10
  -1  -5   0  202.98   23.80
   1   5   0  218.18    8.10
   1  -5   0  198.38   17.30
  -1  -5   0  210.38   11.50
   2  -5   0  781.32   37.10
   2  -5   0  763.92   31.60
  -2  -5   0  736.23   25.20
  -2  -5   0  709.73   27.30
   2   5   0  735.53   35.50
   2   5   0  755.02   25.60
   3  -5   0    9.10   13.60
  -3  -5   0    6.50    4.90
  -3  -5   0   13.30    4.50
   3   5   0   41.80   20.10
  -3  -5   0   10.10    8.70
   3   5   0   11.70    3.20
   3  -5   0   10.40    3.20
  -3  -5   0   12.40    2.40
  -4  -5   0  428.56   20.00
  -4  -5   0  467.45   18.20
   4  -5   0  449.06   16.50
  -4  -5   0  445.56   17.40
  -4  -5   0  459.65   16.70
   4   5   0  453.85   18.20
  -4  -5   0  461.45   19.90
   5  -5   0   10.10    4.70
  -5  -5   0    6.50    6.10
  -5  -5   0   17.30    4.30
  -5  -5   0   11.60    6.00
   5  -5   0    6.80    2.60
  -5  -5   0   14.80    3.50
   5   5   0    7.90    4.80
  -5   5   0    9.90    3.60
   5   5   0    5.60    3.90
   6   5   0   10.80    5.80
   6   5   0   20.20    3.60
   6  -5   0   24.90    4.00
  -6  -5   0   20.10    5.20
  -6  -5   0   18.70    6.60
  -6  -5   0   14.50    3.60
   7  -5   0   86.09    5.60
  -7  -5   0   87.99    6.80
   7  -5   0   88.19    5.10
   7   5   0   93.79    7.10
   0   6   0    4.80   14.30
   0  -6   0   21.60   15.80
   1   6   0  313.07   23.40
   2  -6   0  263.77   11.60
   2  -6   0  283.17   22.70
   2   6   0  260.77   29.90
  -2  -6   0  305.57   15.40
  -2  -6   0  304.37   11.40
   2   6   0  314.07   11.40
  -3   6   0   92.19    8.10
   3   6   0   86.89    6.20
   3  -6   0   68.99   21.70
   3   6   0   89.79   11.10
   3  -6   0   83.69    5.80
  -3  -6   0   88.49    8.40
  -3  -6   0   93.19    5.60
  -3  -6   0   88.19    7.30
  -3  -6   0   93.69   10.80
   4   6   0  126.19    8.60
  -4  -6   0  122.09    8.80
   4   6   0  142.19    9.20
  -4  -6   0  138.39    8.00
  -4  -6   0  134.19    7.20
  -4  -6   0  133.69   13.80
  -4  -6   0  141.29   12.10
  -4   6   0  138.39    8.30
   4  -6   0  142.39    7.00
   5   6   0  297.57   13.90
  -5  -6   0  321.17   16.10
  -5  -6   0  286.97   16.50
   5   6   0  267.77   12.80
  -5  -6   0  294.07   13.10
  -5  -6   0  285.17   12.10
  -5   6   0  284.17   12.20
   5  -6   0  293.27   13.80
  -6  -6   0  -11.80    6.90
   6   6   0   -0.50    3.20
   6  -6   0   -2.90    3.40
   6  -6   0   -2.00    2.10
  -6  -6   0   -0.70    3.00
  -6  -6   0   -4.10    4.20
   7  -6   0   90.49    4.90
   7  -6   0   92.39    6.20
   7  -6   0   84.49    5.80
  -7  -6   0   98.79    7.00
   0  -7   0    1.50    2.70
   1   7   0  326.37   15.90
  -1  -7   0  315.17   12.20
   1  -7   0  315.67   12.40
  -2  -7   0    8.30    5.00
   2  -7   0   26.90   18.70
  -2   7   0    9.20    7.50
   2   7   0    8.00    5.70
  -2   7   0   19.40    5.00
  -2  -7   0   17.40    8.30
  -2  -7   0   14.70    2.90
   2  -7   0   11.20    3.00
  -2  -7   0   21.10    5.30
  -3  -7   0   61.69    7.30
  -3  -7   0   68.99    9.70
   3   7   0   60.29    9.40
  -3  -7   0   81.09    6.60
   3  -7   0   63.29    5.30
  -3   7   0   79.49    7.90
   3   7   0   69.59    5.30
  -3  -7   0   60.09    5.20
  -4  -7   0  118.29    8.20
   4  -7   0  108.99    6.40
  -4  -7   0   83.99   13.20
  -4  -7   0  109.39    6.60
   4   7   0   91.09    7.50
  -4  -7   0  109.19    7.30
  -5  -7   0   33.40    4.40
   5  -7   0   38.80    4.60
  -5  -7   0   33.50    7.20
  -5  -7   0   26.90    4.20
  -5  -7   0   36.10    5.10
   5  -7   0   36.80    5.60
  -5  -7   0   38.40    8.10
  -6  -7   0    8.90    5.00
   6  -7   0    5.10    2.10
   6  -7   0    1.00    3.90
  -6  -7   0    3.50    2.60
   0   8   0   31.10    6.00
   0  -8   0   23.40    3.20
  -1  -8   0   64.39    5.00
  -1   8   0   54.79    7.70
   1   8   0   54.49    8.80
  -1   8   0   60.19    9.40
  -1  -8   0   57.49    9.30
  -1  -8   0   65.59    9.40
   1  -8   0   67.19    5.40
   2   8   0   -3.80    5.20
  -2  -8   0    3.00    2.40
   2  -8   0    6.70    2.90
  -2   8   0    7.80    6.60
  -2  -8   0    0.70    4.60
  -2  -8   0   -3.90    3.70
   3  -8   0  354.36   13.40
  -3  -8   0  349.67   14.60
  -3  -8   0  362.46   15.30
  -3  -8   0  317.97   22.10
  -3  -8   0  357.46   13.80
   3   8   0  337.27   16.90
  -4  -8   0  128.79    7.20
  -4  -8   0  124.19    8.50
  -4  -8   0  122.79    7.60
  -4  -8   0  108.59   18.70
   4  -8   0  123.89    6.90
  -5  -8   0    7.00    4.50
  -5  -8   0    7.30    9.10
   5  -8   0   10.30    2.60
   5  -8   0    8.80    4.90
  -5  -8   0    8.20    2.70
  -6  -8   0   46.70    6.80
  -6  -8   0   50.19    4.30
   6  -8   0   43.50    4.10
   6  -8   0   53.39    6.40
   0   9   0   -6.30    4.70
   0  -9   0   10.90    6.10
  -1   9   0   -1.60    5.10
   1  -9   0   -0.60    2.60
  -1  -9   0   -0.30    2.50
  -1  -9   0    6.70    5.50
  -1  -9   0   -1.70    4.30
   1   9   0    2.30    4.60
  -2   9   0    1.90    5.80
  -2  -9   0    3.70    3.50
   2   9   0   -3.40    4.70
  -2  -9   0    3.80    2.60
  -2  -9   0    2.80    4.30
   3  -9   0   24.60    5.10
  -3  -9   0   25.80    3.80
   3   9   0   25.50    5.60
  -3  -9   0   32.30    4.80
  -4  -9   0   13.50   11.20
   4  -9   0    6.90    2.60
  -4  -9   0    3.60    3.10
  -4  -9   0    3.70    2.60
  -4  -9   0    3.00    2.80
   5  -9   0   48.20    4.30
  -5  -9   0   47.10    4.50
  -5  -9   0   49.00    4.80
  -6  -9   0   11.70    2.10
   0  10   0   91.79    9.30
   0 -10   0   88.79    6.00
   0 -10   0   88.49   10.40
   0 -10   0   87.19    8.50
   1  10   0   66.09    8.60
  -1 -10   0   57.39    6.90
   1 -10   0   61.69    5.10
  -1  10   0   55.79    8.70
  -1 -10   0   55.69    5.40
  -1 -10   0   61.29    7.70
   2 -10   0   10.90    2.90
  -2 -10   0   12.20    4.20
  -2 -10   0    3.50    3.20
   2  10   0   19.80    5.00
  -2 -10   0    9.20    2.80
  -2  10   0   13.40    5.60
  -3 -10   0   -0.20    3.10
  -3 -10   0    1.60    2.40
  -3 -10   0    4.60    2.60
   3 -10   0    0.30    2.50
  -4 -10   0   46.50    4.90
  -4 -10   0   53.49    5.20
  -4 -10   0   55.99    4.70
   4 -10   0   48.90    4.60
   5 -10   0    2.40    2.30
  -5 -10   0    1.20    1.90
   0 -11   0    0.40    3.40
   0  11   0    3.30    4.10
   0 -11   0    2.80    2.50
   1 -11   0    6.40    2.70
   1  11   0   11.00    4.40
  -1 -11   0    2.00    2.50
  -1  11   0   15.00    4.60
  -1 -11   0    4.80    3.10
  -2 -11   0    3.80    3.40
  -2 -11   0    4.20    2.60
  -2 -11   0   -0.50    2.40
  -2  11   0    4.30    5.20
   2 -11   0    5.70    2.60
  -3 -11   0  172.68    8.60
  -3 -11   0  173.98    8.00
  -3 -11   0  173.68    8.10
   3 -11   0  193.18    9.20
  -4 -11   0    7.30    3.30
  -4 -11   0    2.40    1.90
   4 -11   0    3.00    2.40
  -4 -11   0    3.50    2.10
  -5 -11   0   33.20    3.10
   0 -12   0    9.40    2.90
   0 -12   0   15.50    4.90
   0  12   0   12.00    4.00
  -1 -12   0   31.90    4.80
  -1 -12   0   23.90    4.10
  -1 -12   0   23.30    3.10
  -1  12   0   31.10    4.70
   1 -12   0   30.30    3.80
   1 -12   0   31.00    4.90
   1  12   0   40.40    5.90
   2 -12   0    8.60    2.50
  -2 -12   0    2.40    2.30
  -2 -12   0    8.20    3.10
  -2 -12   0    4.30    2.20
   2 -12   0    5.20    2.80
   3 -12   0  271.17   10.10
   3 -12   0  274.67   10.30
  -3 -12   0  240.18    9.90
  -3 -12   0  265.87    9.90
  -3 -12   0  256.97   10.60
  -4 -12   0    9.50    2.00
   0 -13   0    1.20    3.70
   0 -13   0   -1.70    2.10
  -1 -13   0    7.20    2.20
  -1 -13   0    6.00    2.20
   1 -13   0    8.80    2.40
   1 -13   0    7.80    2.30
  -2 -13   0  341.57   12.00
   2 -13   0  340.07   12.30
  -1   0   1 2073.19   67.49
   1   0  -1 2001.80   67.59
  -1   0  -1 2096.29   67.79
   1   0   1 2124.09   67.69
   1   0  -1 2134.29   67.49
  -1   0   1 2040.70   67.49
   1   0   1 2070.89   67.79
  -1   0  -1 1992.20   67.59
  -2   0   1  518.65   21.70
   2   0   1  541.75   21.20
  -2   0   1  515.55   21.10
   2   0  -1  472.35   17.80
  -2   0   1  483.95   17.10
   2   0  -1  508.35   21.70
   2   0  -1  507.75   20.50
   2   0   1  495.45   21.60
  -2   0  -1  470.25   21.20
  -2   0  -1  494.65   17.20
  -2   0  -1  550.74   21.60
   2   0   1  475.85   17.60
  -3   0   1  153.08   15.20
  -3   0   1  161.88    7.10
   3   0  -1  171.88   14.50
   3   0   1  147.19    8.20
   3   0  -1  131.79   19.90
   3   0  -1  152.58    8.90
   3   0   1  166.98   21.80
  -3   0  -1  156.78    7.20
   3   0   1  162.48   14.80
  -3   0  -1  175.78   15.50
   4   0   1   -0.80    4.50
  -4   0  -1   -1.20    2.60
   4   0  -1    1.60    2.00
  -4   0   1    2.60    2.50
   4   0   1    0.70    2.10
   4   0  -1    1.60   14.00
   4   0   1   14.70   14.50
   4   0  -1   -2.60    5.20
  -5   0  -1   15.50    5.60
   5   0  -1   22.50    3.90
   5   0   1   11.70    6.90
   5   0   1   22.60    4.40
  -5   0  -1   20.80    3.90
   5   0  -1   18.50    7.20
   5   0  -1   14.20    4.20
   5   0   1   18.80    3.50
  -5   0  -1   25.70    5.10
   5   0  -1   18.70    2.80
  -5   0   1   20.40    4.30
   5   0   1   17.50    2.70
  -5   0   1   20.70    3.60
   6   0  -1   23.40    3.70
   6   0   1   26.40    9.10
   6   0  -1   27.40    4.20
  -6   0   1   16.10    4.30
   6   0   1   24.60    4.40
   6   0   1   20.80    3.30
   6   0  -1   23.70    4.20
   6   0  -1   16.40    9.50
  -6   0  -1   19.30    4.40
  -7   0  -1  132.39    8.10
   7   0  -1  127.59    6.80
   7   0  -1  125.79    7.40
   7   0   1  133.19    7.50
   7   0   1  107.69    6.90
   7   0   1   87.39   24.10
  -7   0   1  127.29    7.80
   8   0   1   10.70    3.60
   8   0   1    1.60    3.00
   8   0  -1    5.50    2.80
  -8   0   1    3.20    2.00
  -8   0  -1    4.10    2.30
   0  -1   1  276.97   10.40
   0  -1  -1  295.67    9.70
   0   1  -1  276.77   10.30
   0   1  -1  299.47   10.30
   0   1   1  283.57    9.70
   0  -1   1  268.67   10.20
  -1   1   1  486.45   17.00
  -1  -1  -1  452.85   17.90
  -1  -1  -1  515.25   18.30
   1   1  -1  474.75   18.30
   1  -1   1  492.15   17.70
  -1   1  -1  498.65   17.60
   1   1   1  445.06   16.00
   1   1   1  444.86   17.90
  -1   1  -1  462.95   15.80
  -1  -1   1  465.85   18.00
   1   1   1  493.55   17.90
   1  -1  -1  492.75   17.00
   1  -1  -1  473.95   17.00
   2   1  -1  178.68   13.20
   2  -1   1  166.98   11.80
   2   1  -1  173.38    7.70
  -2  -1  -1  168.98   11.10
  -2   1   1  175.28    6.50
  -2  -1  -1  169.08    7.20
   2   1  -1  184.18   10.80
  -2  -1  -1  156.28   12.30
  -2   1   1  156.28   10.10
   2  -1   1  170.88   10.10
   2   1   1  181.28   13.20
  -2  -1   1  183.78   11.80
   2  -1  -1  167.08   10.90
   2  -1  -1  179.68   10.10
  -2   1  -1  180.48   10.90
  -2  -1   1  172.68   13.80
  -2   1  -1  165.58    6.70
   2   1   1  170.78   10.80
  -2  -1   1  160.08    7.10
   2   1   1  165.88    7.40
   3   1  -1  412.46   22.50
  -3   1   1  417.96   14.40
   3   1  -1  402.06   29.60
   3  -1   1  424.86   22.20
   3   1  -1  412.36   15.90
   3  -1   1  353.36   26.10
   3  -1   1  405.46   16.30
  -3  -1  -1  400.06   22.90
  -3   1   1  363.26   22.20
  -3  -1  -1  412.76   15.30
  -3  -1   1  411.56   15.10
  -3   1  -1  420.76   14.70
  -3   1  -1  395.56   22.90
   3   1   1  437.66   30.50
   3  -1  -1  415.26   21.20
   3   1   1  410.56   22.70
   3  -1  -1  366.56   25.30
   3   1   1  412.56   15.90
   3  -1  -1  403.36   16.60
   4   1  -1  176.78   10.50
   4  -1   1  158.98   11.20
  -4  -1  -1  143.89   23.90
   4   1  -1  170.98   25.90
  -4  -1  -1  153.48    8.50
   4   1  -1  153.48    7.00
  -4   1   1  159.98    7.20
   4  -1   1  155.48    7.00
   4  -1   1  154.08   20.50
   4   1   1  164.38   10.00
  -4   1  -1  162.58    7.70
   4   1   1  151.88    7.00
   4  -1  -1  153.88    7.10
   4  -1  -1  133.69   20.90
   4  -1  -1  151.98   12.40
   4   1   1  115.79   18.20
  -4  -1   1  169.38    8.50
   5   1  -1   85.99    5.40
   5   1  -1   86.09    6.50
   5   1  -1   86.69   10.80
   5   1  -1   87.49    7.10
   5  -1   1   84.79   13.10
   5  -1   1   87.89    7.10
  -5  -1  -1   93.09    8.60
  -5  -1  -1   89.39    8.50
  -5   1   1   83.39    7.70
  -5  -1  -1   86.89    7.50
   5  -1   1   84.29    5.40
   5  -1   1   92.79    8.00
   5   1   1   84.39   10.10
  -5  -1   1   62.49    9.10
   5  -1  -1   95.19    5.50
   5  -1  -1  109.89   16.90
  -5  -1   1   93.49    8.20
   5  -1  -1   91.59    7.10
   5   1   1   91.49    6.60
   5  -1  -1   78.89    7.80
   5   1   1   86.99    7.60
  -5   1  -1   92.59    6.10
  -5   1  -1   87.49    7.80
   5   1   1   87.39    5.50
  -5  -1   1   91.29    7.30
  -6  -1  -1   31.40    5.40
   6   1  -1   33.00    5.00
  -6  -1  -1   27.60    4.90
  -6   1   1   37.30    6.30
   6  -1   1   29.70   10.70
   6  -1   1   33.60    4.40
   6  -1   1   41.80    6.00
   6   1  -1   35.50    8.40
   6   1  -1   37.80    6.10
   6   1  -1   31.90    4.40
   6  -1  -1   32.70    4.40
   6   1   1   26.40    7.80
   6  -1  -1   23.00    4.30
   6   1   1   37.60    5.90
   6  -1  -1   30.10    4.10
  -6  -1   1   36.10    5.50
   6  -1  -1   20.90   11.40
   6   1   1   46.50    4.80
  -6   1  -1   33.70    5.20
   7  -1   1   50.79    5.10
   7   1  -1   53.99    5.80
   7   1  -1   67.69    5.70
   7   1  -1   22.50   16.70
  -7   1   1   60.99    5.90
  -7  -1  -1   66.39    6.60
   7  -1   1   65.09    5.70
  -7  -1   1   66.89    6.40
   7   1   1   39.30   10.70
  -7   1  -1   60.59    5.90
   7  -1  -1   66.49    5.70
   7   1   1   60.59    5.50
   7  -1  -1   61.89    4.90
   8  -1   1   47.70    4.50
  -8  -1  -1   42.00    4.50
   8   1  -1   43.70    4.00
   8  -1   1   42.00    4.00
   8  -1  -1   41.50    3.70
  -8  -1   1   43.50    4.00
  -8   1  -1   37.80    3.60
   8  -1  -1   35.90    3.60
   8   1   1   45.20    3.80
   0   2  -1 1606.84   52.09
   0   2   1 1616.44   51.29
   0  -2  -1 1571.84   51.39
   0   2   1 1533.95   51.19
   0   2   1 1527.35   51.49
   0   2  -1 1614.94   51.99
   0   2  -1 1516.85   50.29
   0  -2   1 1587.94   52.09
  -1   2   1 1181.78   38.50
   1   2  -1 1149.78   37.70
  -1  -2  -1 1178.28   40.50
   1   2  -1 1225.68   40.50
   1   2  -1 1122.39   40.90
  -1  -2  -1 1176.48   40.50
   1  -2   1 1166.58   39.70
  -1   2  -1 1122.79   37.20
   1   2   1 1166.58   41.50
   1   2   1 1180.58   37.60
   1  -2  -1 1168.78   38.80
  -1  -2   1 1128.79   40.60
   1   2   1 1142.29   40.50
  -1  -2   1 1104.89   37.90
   2  -2   1  158.28   11.70
   2  -2   1  154.68   10.60
   2   2  -1  156.68   15.30
  -2  -2  -1  135.19   13.80
  -2   2   1  151.18    9.90
   2   2  -1  143.19   10.70
   2   2  -1  147.49    6.90
  -2  -2  -1  146.19   11.70
  -2  -2  -1  156.08    7.10
  -2   2   1  147.89    5.00
  -2  -2   1  144.89    6.80
   2  -2  -1  161.78    9.50
   2   2   1  149.29    6.70
   2   2   1  137.89   11.20
   2   2   1  130.79   14.20
  -2   2  -1  145.09   10.50
   2  -2  -1  153.98   10.60
  -2   2  -1  146.39    5.80
  -2  -2   1  142.19   14.10
  -3  -2  -1  257.97   21.00
  -3  -2  -1  254.47   10.90
   3   2  -1  354.96   51.29
   3  -2   1  244.58   12.80
   3   2  -1  256.37   18.50
   3   2  -1  257.17   11.20
  -3   2   1  243.38    8.70
   3  -2   1  267.97   25.30
   3  -2   1  248.98   17.70
  -3   2  -1  231.88   19.20
   3   2   1  247.68   10.90
   3  -2  -1  245.48   17.30
   3   2   1  240.18   18.20
   3  -2  -1  262.27   22.50
  -3   2  -1  253.87    9.50
  -3  -2   1  255.77   10.80
   4   2  -1  -18.80   17.20
   4   2  -1   15.80    2.70
  -4  -2  -1    6.80    3.30
   4  -2   1   18.80    7.00
   4   2  -1    8.20    4.10
  -4  -2  -1   11.10    3.80
   4  -2   1   35.90   16.50
   4   2   1    8.70    3.80
   4   2   1   -1.70   17.00
  -4   2  -1   11.80    2.40
   4   2   1   10.20    2.40
   4  -2  -1   12.20    2.60
   4  -2  -1   -3.90   14.80
  -4  -2   1   18.20    3.80
  -5  -2  -1   33.00    4.90
  -5  -2  -1   27.10    5.30
  -5  -2  -1   29.30    5.10
   5   2  -1   15.50    5.70
   5  -2   1   30.40    9.60
  -5   2   1   25.50    4.70
   5  -2   1   23.00    4.20
   5   2  -1   27.00    4.60
   5  -2   1   28.20    3.90
   5   2  -1   26.70    3.70
   5  -2   1   23.30    4.90
   5   2  -1   27.50    3.90
  -5  -2   1   23.50    5.20
   5   2   1   24.40    4.20
  -5   2  -1   28.80    5.00
   5  -2  -1   26.60    4.60
  -5  -2   1   23.20    4.70
  -5  -2   1   24.20    5.10
   5  -2  -1   25.40    5.10
   5   2   1   37.00    6.10
   5   2   1   33.00    4.30
   5  -2  -1   27.10    4.00
   5   2   1   29.60    3.80
   6  -2   1  293.07   13.00
   6   2  -1  311.47   12.10
   6   2  -1  274.77   17.20
  -6  -2  -1  247.88   13.60
  -6  -2  -1  294.07   14.10
   6   2  -1  300.37   13.20
   6   2  -1  294.67   12.00
   6  -2   1  313.27   12.00
  -6  -2  -1  311.07   14.40
  -6   2   1  297.47   13.20
  -6  -2   1  294.67   13.50
   6   2   1  309.77   12.60
  -6  -2   1  288.47   13.90
   6  -2  -1  292.87   13.10
  -6   2  -1  290.97   13.20
   6   2   1  292.77   17.10
   6  -2  -1  252.97   13.40
   6  -2  -1  300.37   11.90
  -6  -2   1  303.37   13.50
   6   2   1  286.57   12.90
   7   2  -1    8.50    2.90
  -7  -2  -1    8.50    3.50
   7  -2   1    6.90    2.70
  -7   2   1   13.50    3.10
   7  -2   1   11.50    2.90
  -7  -2   1    1.80    3.30
   7   2   1    9.70    2.90
  -7   2  -1    8.90    3.20
   7  -2  -1    8.80    2.50
   7  -2  -1    2.90    2.70
  -8  -2  -1   34.70    3.70
   8   2  -1   37.30    3.30
   8  -2   1   34.60    3.40
   8  -2   1   37.10    3.70
   8  -2  -1   41.80    3.80
   8  -2  -1   37.00    3.50
  -8  -2   1   46.10    3.80
   8   2   1   36.20    3.40
   0   3   1 7069.99  229.28
   0   3   1 7202.28  229.08
   0   3  -1 6911.51  227.18
   0  -3   1 7326.27  230.28
   0   3  -1 6572.94  229.68
   0   3   1 7439.06  229.18
   0   3  -1 7392.16  229.88
   0  -3  -1 7456.55  229.48
   1  -3   1 2578.34   83.79
   1   3  -1 2653.43   84.69
  -1  -3  -1 2478.65   84.59
  -1   3   1 2487.25   81.99
   1   3  -1 2428.76   80.89
   1  -3   1 2382.96   83.19
   1   3  -1 2540.65   85.49
   1   3   1 2483.55   84.89
   1   3   1 2466.85   80.69
   1  -3  -1 2570.04   82.39
  -1   3  -1 2604.84   83.39
   1   3   1 2596.94   84.09
  -1  -3   1 2464.65   84.99
  -1   3  -1 2454.95   80.19
  -1  -3   1 2532.15   81.49
   1  -3  -1 2644.74   82.79
  -2   3   1  757.42   28.70
   2   3  -1  770.12   25.80
  -2  -3  -1  733.33   26.10
  -2  -3  -1  729.63   33.70
   2  -3   1  765.12   29.40
   2  -3   1  731.23   30.50
   2   3  -1  769.32   35.80
   2   3  -1  737.03   32.10
   2  -3  -1  771.82   29.50
  -2  -3   1  736.23   26.10
   2   3   1  777.52   25.70
   2   3   1  753.62   31.20
  -2   3  -1  756.42   24.30
  -2  -3   1  742.23   34.60
  -2   3  -1  709.83   24.50
  -2   3  -1  729.33   29.70
   2  -3  -1  801.72   28.80
   3   3  -1  367.06   14.40
   3   3  -1  341.27   22.90
   3   3  -1  353.16   12.80
   3  -3   1  347.07   21.70
  -3  -3  -1  360.36   13.00
  -3  -3  -1  341.37   14.40
   3   3   1  358.26   24.40
   3   3   1  343.97   13.90
  -3  -3   1  357.86   14.40
   3  -3  -1  355.96   26.20
  -3  -3   1  346.97   12.90
   3  -3  -1  339.67   21.90
   4  -3   1   92.99    5.30
  -4  -3  -1   88.59    5.80
   4   3  -1   84.79   23.10
   4  -3   1  129.69   21.50
  -4  -3  -1   92.39    7.20
   4   3  -1   92.59    5.40
  -4  -3  -1   92.69    7.40
  -4   3   1   93.89    8.00
   4   3  -1   89.99    6.90
  -4  -3  -1   93.49    8.00
   4   3  -1   89.99    8.00
  -4  -3   1   79.79    7.30
  -4  -3   1   90.59    9.30
   4   3   1   91.29    5.60
  -4  -3   1   86.39    6.30
   4   3   1   74.99   21.10
   4   3   1   89.89    7.60
   4  -3  -1   68.09   18.40
  -4  -3   1   96.19    7.80
   4   3   1   86.59    6.90
  -4  -3   1   87.39    8.10
  -4   3  -1   74.29    7.50
   4  -3  -1   91.79    5.50
   5   3  -1   57.09    8.90
  -5   3   1   47.80    7.10
  -5  -3  -1   43.10    6.60
   5   3  -1   51.19    7.10
  -5  -3  -1   55.89    8.60
  -5  -3  -1   50.89    8.00
   5  -3   1   57.79    4.80
   5  -3   1   53.39    6.50
   5   3  -1   51.79    5.00
  -5  -3  -1   51.19    8.00
   5  -3   1   46.80    7.10
  -5  -3   1   60.49    7.20
   5   3   1   63.59    5.50
   5  -3  -1   57.79    7.90
   5   3   1   52.59    5.40
   5  -3  -1   65.09    7.30
   5   3   1   55.49    7.10
  -5  -3   1   61.59    7.90
   5  -3  -1   43.60    4.60
  -5  -3   1   52.19    9.50
   6  -3   1   48.60    6.30
   6   3  -1   45.70    6.30
  -6   3   1   47.40    6.30
   6   3  -1   53.89   10.80
   6   3  -1   45.60    6.00
   6  -3   1   51.09    5.00
  -6  -3  -1   63.59    7.70
  -6  -3  -1   46.00    6.70
  -6  -3  -1   34.30    7.80
   6  -3  -1   50.89    5.10
  -6   3  -1   58.09    6.50
  -6  -3   1   48.90    7.40
   6  -3  -1   49.20    6.20
   6   3   1   46.20    8.00
  -6  -3   1   58.39    7.00
   6   3   1   54.49    6.10
   7  -3   1   42.10    4.70
  -7   3   1   43.10    4.70
   7  -3   1   37.10    4.30
   7   3  -1   39.00    4.60
  -7  -3  -1   34.50    5.80
  -7  -3   1   34.90    5.60
   7   3   1   38.80    5.70
   7  -3  -1   34.80    4.20
   7  -3  -1   32.90    4.80
  -7   3  -1   38.10    4.90
  -8  -3  -1   63.09    4.30
   8  -3   1   59.59    3.90
   8   3  -1   55.89    3.90
   8  -3   1   67.99    4.10
  -8  -3   1   62.49    4.10
   8  -3  -1   60.29    3.90
   8  -3  -1   62.49    4.00
   0   4   1   25.40    4.70
   0  -4  -1   20.80    5.30
   0   4   1   15.90    5.60
   0   4  -1   19.00    1.90
   0   4   1   19.40    4.10
   1  -4   1  432.26   20.50
   1   4  -1  445.86   15.60
   1  -4   1  464.05   20.50
   1   4  -1  460.05   21.50
   1   4  -1  457.65   20.30
  -1   4   1  434.86   17.90
  -1  -4  -1  456.95   21.70
  -1  -4  -1  425.86   17.20
   1   4   1  457.15   19.90
   1   4   1  457.45   15.30
  -1   4  -1  459.05   19.70
   1  -4  -1  435.76   18.70
  -1  -4   1  442.16   17.00
  -1  -4   1  446.96   23.80
   1  -4  -1  480.05   19.30
   2  -4   1  159.28   15.60
   2  -4   1  160.98   18.40
  -2   4   1  154.38   13.40
  -2  -4  -1  172.28    9.20
   2   4  -1  175.98    7.70
   2  -4   1  183.78   13.10
  -2  -4  -1  159.98   21.30
   2   4  -1  171.28   14.80
   2   4   1  173.98    7.50
   2  -4  -1  185.88   13.90
   2  -4  -1  169.98   14.90
  -2  -4   1  172.58    9.00
  -2   4  -1  148.99   15.30
   2   4   1  166.88   14.40
   2  -4  -1  192.68   12.10
   3   4  -1  184.58   23.70
  -3  -4  -1  178.38    7.80
  -3  -4  -1  184.88   10.20
   3  -4   1  165.48    7.90
   3   4  -1  193.18    9.20
   3   4  -1  182.68    8.40
   3  -4   1  153.68   19.30
  -3  -4   1  175.78    7.80
  -3  -4   1  175.68    9.80
   3   4   1  194.68   21.80
   3   4   1  193.78    8.80
   3  -4  -1  168.38   11.60
   3  -4  -1  179.98   18.00
   4   4  -1   37.50    5.90
   4   4  -1   37.90    4.00
  -4  -4  -1   46.60    4.60
   4   4  -1   26.70   29.30
  -4  -4  -1   32.70    4.20
   4   4  -1   41.40    5.60
   4  -4   1   64.69    9.40
   4  -4   1   41.10    6.40
  -4   4   1   45.40    5.40
  -4  -4  -1   45.20    6.70
  -4  -4  -1   39.20    7.90
   4  -4   1   50.29    4.20
   4  -4  -1    6.10   21.70
  -4  -4   1   37.60    6.00
   4   4   1  -19.90   26.80
  -4   4  -1   41.40    6.60
   4  -4  -1   40.90    6.10
  -4  -4   1   39.50    5.20
   4   4   1   39.20    5.10
  -4  -4   1   59.29   10.00
   4   4   1   38.60    6.00
   4   4   1   40.10    5.90
  -4  -4   1   45.60    7.00
   5   4  -1  221.88    9.90
   5   4  -1  219.78   12.90
  -5  -4  -1  216.28   11.30
  -5   4   1  234.68   11.00
  -5  -4  -1  222.48   13.40
   5   4  -1  223.38   11.10
  -5  -4  -1  224.78   10.20
   5  -4   1  245.88   10.00
   5  -4   1  220.68   11.70
  -5  -4  -1  221.88   13.40
   5   4   1  238.08   11.20
   5  -4  -1  242.38    9.90
  -5  -4   1  221.18   13.00
   5  -4  -1  224.08   12.00
  -5  -4   1  230.08   10.50
   5   4   1  241.88   13.40
   5  -4  -1  235.68   11.50
  -5  -4   1  230.28   13.20
  -5   4  -1  231.58   11.00
  -5  -4   1  225.88   11.40
  -6  -4  -1  126.59   11.30
  -6   4   1  131.89    7.90
   6  -4   1  134.69    7.10
   6   4  -1  134.39    8.10
  -6  -4  -1  127.89    8.30
   6  -4   1  152.38    8.30
   6   4  -1  105.49   11.20
  -6  -4  -1  141.99    9.90
   6   4   1  143.69   11.00
   6   4   1  133.89    7.90
  -6  -4   1  146.39    9.80
   6  -4  -1  127.69    6.90
  -6  -4   1  122.99    8.30
  -6  -4   1  143.89   11.20
  -6   4  -1  131.69    8.10
   6  -4  -1  128.89    8.50
   7  -4   1  102.39    5.60
   7   4  -1   95.69    5.80
   7  -4   1  105.99    6.30
  -7  -4  -1  103.29    7.40
  -7   4  -1  101.19    5.90
   7  -4  -1   94.39    5.50
   7   4   1  103.09    6.10
   7  -4  -1  101.79    6.40
  -7  -4   1   99.39    7.10
   0   5  -1  137.99   13.60
   0   5   1  141.99   11.20
   0   5   1  136.19   12.80
   0   5  -1  122.99    5.00
   0   5  -1  141.29   11.80
   0  -5   1  125.19   17.40
   0  -5  -1  128.59   14.30
   1   5  -1  449.46   22.80
  -1  -5  -1  475.45   28.50
   1   5  -1  446.36   24.10
  -1   5   1  441.36   19.50
  -1  -5  -1  407.06   18.30
   1   5  -1  445.46   15.20
   1   5   1  433.26   14.60
  -1  -5   1  383.06   29.90
   1   5   1  463.85   22.20
  -1  -5   1  413.56   17.40
   1  -5  -1  437.26   21.90
  -1   5  -1  417.46   21.90
   2   5  -1 1044.10   34.00
   2   5  -1  991.10   43.80
  -2  -5  -1  971.40   35.50
  -2  -5  -1  974.60   33.40
  -2  -5   1  981.50   35.30
   2  -5  -1 1043.80   38.70
   2  -5  -1 1061.49   41.80
   2   5   1  991.80   43.20
   2   5   1 1020.80   33.60
  -2  -5   1  978.00   33.40
  -3  -5  -1   43.10    9.90
   3   5  -1   40.30    5.20
   3   5  -1   33.20   20.20
   3  -5   1   34.20   14.40
  -3  -5  -1   38.10    4.00
  -3  -5  -1   34.60    5.80
   3  -5   1   39.90    4.70
  -3  -5   1   42.70    5.30
  -3  -5   1   34.30    5.50
  -3  -5   1   33.70    4.00
  -3  -5   1   42.80    6.10
   3   5   1   43.50    5.00
   3  -5  -1   43.40    5.40
   3   5   1   13.10   20.60
   3  -5  -1   35.70   13.10
   4   5  -1   89.99    7.40
  -4  -5  -1   86.29   12.70
  -4  -5  -1   87.69    6.90
   4  -5   1   79.99    5.50
  -4  -5  -1   79.19    5.70
  -4  -5  -1   90.49    7.30
  -4   5   1   81.49    7.70
   4  -5   1   82.59    9.50
  -4  -5  -1  100.29    9.70
   4   5   1   86.69    8.00
  -4  -5   1   86.99    5.90
   4   5   1   91.09    7.10
  -4  -5   1   90.69    7.00
   4  -5  -1   84.99    5.70
  -4  -5   1   82.59   11.40
  -4   5  -1   87.29    7.40
  -4  -5   1   81.39    7.60
  -4  -5   1   88.09    9.40
   5  -5   1   54.19    7.40
   5   5  -1   57.49    6.40
  -5  -5  -1   50.39    7.60
  -5  -5  -1   39.40    4.60
  -5  -5  -1   45.10    6.70
  -5   5   1   43.60    6.00
   5   5  -1   47.00    7.90
   5  -5   1   41.80    4.60
  -5  -5  -1   34.50    4.20
  -5  -5  -1   41.90    7.30
   5   5   1   38.50    5.00
   5  -5  -1   38.30    5.60
  -5  -5   1   48.50    7.30
   5  -5  -1   47.30    4.80
  -5   5  -1   47.00    6.00
  -5  -5   1   37.00    6.70
  -5  -5   1   44.10    5.50
  -5  -5   1   39.40    4.40
   5   5   1   44.70    7.80
   6  -5   1   25.80    5.10
   6   5  -1   43.00    5.50
  -6  -5  -1   34.50    5.70
   6   5  -1   33.80    6.50
   6  -5   1   32.60    4.40
  -6  -5  -1   40.60    5.60
  -6  -5  -1   38.30    7.20
   6   5   1   39.30    5.20
  -6  -5   1   63.59   10.70
  -6  -5   1   45.60    7.40
   6   5   1   20.30    6.10
   6  -5  -1   41.40    4.50
  -6  -5   1   36.40    5.50
   7  -5   1  195.18    8.50
  -7  -5  -1  183.88   10.20
  -7  -5  -1  217.08    9.80
   7   5  -1  196.78    8.50
   7  -5   1  200.58    8.20
   7  -5  -1  200.08    8.50
   7  -5  -1  196.48    8.10
  -7  -5   1  198.58    9.40
   7   5   1  194.08   11.30
   0  -6  -1  133.19   23.90
   0  -6   1  107.09   21.00
   0   6   1   93.69   15.90
  -1  -6  -1  355.26   13.60
   1   6  -1  383.06   12.90
   1   6  -1  370.46   25.70
   1   6   1  383.36   24.80
  -1  -6   1  386.36   13.70
  -1  -6   1  347.77   18.30
  -2  -6  -1  173.38   12.90
  -2  -6  -1  147.59    6.90
   2  -6   1  141.59    7.20
   2   6  -1  144.79    7.00
   2   6  -1  142.29   20.80
  -2  -6   1  142.79   11.40
   2   6   1  141.79    6.40
   2   6   1  106.89   25.40
  -2  -6   1  138.09    6.80
   2  -6  -1  130.29   18.40
   3  -6   1  325.27   36.40
  -3  -6  -1  312.97   16.70
  -3  -6  -1  307.07   14.10
  -3  -6  -1  313.87   13.40
   3   6  -1  319.87   12.90
  -3   6   1  275.87   13.60
  -3  -6  -1  304.17   12.10
   3   6  -1  284.17   16.40
   3  -6  -1  259.47   37.00
  -3  -6   1  294.97   14.00
  -3  -6   1  321.57   12.10
   3  -6  -1  318.07   12.20
   3   6   1  320.87   16.60
  -3   6  -1  289.77   13.40
  -3  -6   1  311.47   13.10
   3   6   1  318.37   12.50
  -3  -6   1  318.07   16.30
  -4  -6  -1  184.78   13.80
  -4  -6  -1  173.48    8.30
  -4   6   1  179.48    9.40
  -4  -6  -1  136.29   21.20
  -4  -6  -1  164.78    9.90
   4  -6   1  167.38   11.30
   4   6  -1  180.58    9.90
  -4  -6  -1  169.78    9.10
   4  -6  -1  171.48    8.10
  -4   6  -1  159.28   12.10
  -4  -6   1  165.48    9.00
  -4  -6   1  158.58    9.80
  -4  -6   1  153.98   13.80
   4   6   1  175.38   10.30
   4   6   1  190.08    9.60
  -4  -6   1  183.68    8.40
  -4  -6   1  165.48   12.70
   5   6  -1    5.30    3.70
   5   6  -1   -1.90    4.50
  -5  -6  -1    4.20    6.50
  -5  -6  -1   -2.10    4.40
  -5  -6  -1    0.70    6.70
  -5   6   1    1.60    4.80
  -5  -6  -1    3.80    3.00
   5  -6   1   -2.40    4.20
  -5  -6   1   17.70    6.60
  -5  -6   1   14.50    6.20
   5   6   1    3.80    3.90
   5  -6  -1    4.20    5.10
  -5  -6   1   -1.20    3.40
  -5  -6   1    3.20    3.20
   5   6   1    8.40    4.60
  -5   6  -1    4.50    3.40
  -6  -6  -1   20.70    5.10
   6   6  -1   27.40    3.80
  -6  -6  -1   29.80    3.90
   6  -6   1   32.20    4.10
  -6  -6  -1   22.60    7.80
   6  -6   1   28.30    4.00
   6   6  -1   19.10    7.70
  -6  -6   1   29.20    7.40
   6   6   1   32.50    4.00
  -6  -6   1   25.60    5.10
   6  -6  -1   32.40    4.40
   6  -6  -1   26.10    4.00
  -6  -6   1   23.60    3.60
   7  -6   1   64.29    4.30
  -7  -6  -1   70.19    6.20
   7  -6   1   63.29    5.20
   7  -6   1   73.89    5.70
  -7  -6   1   58.19    5.90
   7  -6  -1   74.19    4.30
   7  -6  -1   70.09    6.10
   7  -6  -1   66.59    6.70
   0  -7  -1    8.40    3.20
   0  -7   1   14.60    2.80
   1  -7   1  128.09    6.60
  -1  -7  -1  118.79    6.40
   1   7  -1  132.89   10.70
   1   7   1  128.69   10.60
  -1  -7   1  124.19    6.40
   1  -7  -1  112.09    7.50
   2   7  -1   36.30    3.70
  -2  -7  -1   39.60    6.00
   2  -7   1   39.70    4.50
   2  -7   1   34.50   20.10
  -2  -7  -1   49.10    4.40
  -2  -7  -1   51.09    8.10
   2   7  -1   61.79    9.20
   2  -7  -1   34.70    5.40
   2   7   1   42.60    6.40
  -2   7  -1   37.00    5.30
  -2  -7   1   41.80    8.70
  -2  -7   1   32.10    5.60
  -2   7  -1   44.70    8.30
  -2  -7   1   29.60    4.90
  -2  -7   1   34.50    4.20
  -3  -7  -1    5.20    2.50
   3   7  -1    4.20    2.90
   3   7  -1    6.50    5.70
  -3  -7  -1    8.00    3.80
  -3  -7  -1    7.10    4.30
   3  -7   1    6.30    2.70
  -3  -7  -1   10.30    7.70
   3  -7  -1    9.70    3.10
  -3   7  -1   10.40    4.40
  -3  -7   1    7.40    4.30
   3   7   1   -1.40    5.20
   3   7   1    5.80    2.30
  -3  -7   1    4.90    7.40
  -3  -7   1    4.20    2.40
  -3  -7   1    4.80    3.10
  -4  -7  -1   53.59    6.10
   4  -7   1   50.69    6.60
   4   7  -1   52.69    6.00
  -4  -7  -1   53.99    5.10
  -4  -7  -1   53.99    9.40
  -4  -7  -1   52.39    6.70
   4  -7   1   53.69    4.90
   4   7  -1   49.50    6.80
  -4  -7   1   53.09    5.30
  -4  -7   1   55.59    6.90
   4  -7  -1   54.39    5.10
  -4  -7   1   53.79    6.00
  -4   7  -1   53.49    6.90
  -4  -7   1   44.40    8.10
   4   7   1   52.99    6.00
  -5  -7  -1   30.40    8.40
  -5  -7  -1   35.70    7.90
   5  -7   1   28.60    4.40
   5  -7   1   30.80    5.00
  -5  -7  -1   24.60    4.00
   5   7  -1   35.50    4.80
  -5  -7  -1   44.90    5.10
   5   7  -1   29.10    5.60
  -5  -7  -1   32.70    4.60
  -5  -7   1   33.00    6.70
  -5  -7   1   48.60    5.30
   5  -7  -1   42.70    4.70
  -5  -7   1   43.00    8.70
  -5  -7   1   35.50    5.90
  -6  -7  -1    2.50    2.60
  -6  -7  -1   -8.00    5.20
   6  -7   1    4.70    3.20
   6  -7   1    7.50    2.20
   6  -7   1    5.70    3.50
   6  -7  -1    5.20    2.20
  -6  -7   1    8.00    2.90
  -6  -7   1    0.30    4.50
   0  -8   1   21.90    3.30
   0  -8   1   17.90    6.60
   0   8  -1   21.20    5.30
   0   8   1   18.80    5.90
   0  -8  -1   19.30    3.20
  -1  -8  -1  335.27   16.20
   1  -8   1  338.47   13.00
  -1   8   1  352.16   16.90
  -1  -8  -1  332.47   16.40
  -1  -8  -1  356.36   13.20
   1   8  -1  365.16   16.40
   1  -8  -1  327.37   13.10
  -1  -8   1  312.97   15.20
  -1  -8   1  323.47   15.50
  -1   8  -1  321.57   14.10
  -1  -8   1  352.66   13.10
  -1   8  -1  327.97   16.60
   1   8   1  345.67   16.30
  -2  -8  -1   78.19    5.40
  -2  -8  -1   73.19    8.40
   2  -8   1   79.59    5.50
  -2  -8  -1   64.09    7.70
   2   8  -1   52.99    9.00
  -2   8   1   68.39   11.10
  -2  -8   1   57.79    7.50
  -2  -8   1   77.49    5.30
   2   8   1   62.89    9.10
  -2   8  -1   56.99    7.80
  -2  -8   1   71.49    7.30
   2  -8  -1   68.99    5.70
  -2   8  -1   62.79    7.40
  -3  -8  -1   66.99    7.40
  -3  -8  -1   59.59    5.20
   3  -8   1   69.39    5.10
  -3  -8  -1   48.60   10.60
  -3  -8  -1   68.09    6.70
   3   8  -1   75.79    9.40
  -3  -8   1   68.99    5.30
   3  -8  -1   63.69    5.40
  -3  -8   1   63.29    7.10
  -3  -8   1   59.69    6.40
   3   8   1   52.39    8.80
  -3   8  -1   55.79    8.10
  -3  -8   1   86.79   14.50
  -4  -8  -1  302.37   12.80
   4  -8   1  306.27   12.20
  -4  -8  -1  300.77   12.40
  -4  -8  -1  298.07   13.50
  -4  -8   1  310.27   12.80
  -4  -8   1  319.77   13.70
   4  -8  -1  297.37   12.10
  -4  -8   1  288.17   12.30
   5  -8   1  108.59    6.00
  -5  -8  -1  113.49    6.30
  -5  -8  -1  100.89   16.90
  -5  -8  -1  116.59    8.10
  -5  -8  -1   90.49    7.10
   5  -8   1  104.09    8.90
   5  -8   1   99.19    8.80
  -5  -8   1  105.09    6.30
  -5  -8   1  120.89   13.20
  -5  -8   1  105.99   11.90
   5  -8  -1   99.89    5.90
  -5  -8   1   94.29    8.80
   5  -8  -1  110.59    9.40
   6  -8   1  167.58    7.20
  -6  -8  -1  167.98    7.50
   6  -8   1  180.38    8.80
  -6  -8   1  171.48   10.70
  -6  -8   1  170.78    7.50
   6  -8  -1  154.58    7.20
   0   9  -1  355.36   16.80
   0  -9   1  336.97   13.30
   0   9   1  344.77   16.70
   0  -9   1  331.57   16.20
   0  -9  -1  335.97   13.20
  -1  -9  -1  275.97   15.80
   1  -9   1  309.07   12.00
  -1  -9  -1  265.27   15.50
  -1   9   1  286.27   15.50
  -1  -9  -1  314.47   12.10
   1   9  -1  319.27   15.60
  -1  -9   1  297.07   13.60
  -1  -9   1  300.47   12.10
  -1   9  -1  280.57   14.90
   1   9   1  282.97   15.00
  -1  -9   1  285.87   14.10
   1  -9  -1  318.67   12.00
  -2   9   1  293.27   16.00
   2  -9   1  302.37   11.90
  -2  -9  -1  309.87   12.20
  -2  -9  -1  294.67   13.40
  -2  -9  -1  289.67   13.90
   2   9  -1  277.57   15.40
   2  -9  -1  297.97   12.00
  -2  -9   1  302.77   13.70
   2   9   1  298.37   15.30
  -2   9  -1  279.27   15.30
  -2  -9   1  296.37   13.10
  -2  -9   1  307.57   12.20
  -3  -9  -1  658.13   24.80
   3   9  -1  684.03   26.70
   3  -9   1  657.73   24.90
  -3  -9  -1  683.33   24.50
  -3  -9   1  661.03   24.80
   3   9   1  690.93   26.70
  -3  -9   1  669.23   24.20
  -3  -9   1  675.03   40.50
   3  -9  -1  637.34   24.10
  -4  -9  -1   87.59    6.70
  -4  -9  -1   86.49    5.90
  -4  -9  -1   81.19    6.10
   4  -9   1   80.39    5.50
   4  -9  -1   80.69    5.70
  -4  -9   1   75.39    6.50
  -4  -9   1   74.79    5.90
  -4  -9   1   75.59   12.20
  -4  -9   1   83.79    5.90
   5  -9   1  122.99    6.40
  -5  -9  -1  131.79    6.40
  -5  -9  -1  139.49    7.20
  -5  -9   1  132.59    6.40
  -5  -9   1  135.29    7.10
   5  -9  -1  133.99    6.50
  -6  -9  -1   17.10    2.30
  -6  -9   1   17.50    2.30
   0 -10  -1  280.07   15.90
   0 -10   1  249.18   13.20
   0  10  -1  248.68   14.00
   0 -10  -1  284.87   11.20
   0 -10  -1  237.78   13.00
   0  10   1  275.67   14.20
   0 -10   1  259.27   11.00
   0 -10   1  254.27   12.30
   1 -10   1  240.78   13.50
   1 -10   1  262.07   10.40
  -1 -10  -1  246.88   10.50
  -1 -10  -1  239.48   12.50
  -1 -10  -1  218.78   11.60
   1  10  -1  236.88   13.60
  -1 -10   1  247.98   16.30
   1  10   1  235.78   13.50
   1 -10  -1  237.68   10.70
  -1 -10   1  233.28   11.40
  -1  10  -1  231.28   13.50
  -1 -10   1  257.87   10.60
  -2 -10  -1    7.30    3.00
   2 -10   1    4.30    2.80
  -2 -10  -1    6.30    3.40
  -2 -10  -1   -3.80    3.80
  -2  10   1    4.70    5.70
   2  10  -1    1.70    4.10
  -2  10  -1    3.10    5.20
   2 -10  -1    3.80    2.90
   2  10   1    4.00    4.50
  -2 -10   1    7.30    3.20
  -2 -10   1    5.90    2.90
  -2 -10   1    4.30    4.00
   3 -10   1  309.87   12.60
  -3 -10  -1  327.57   13.90
  -3 -10  -1  321.27   13.30
  -3 -10  -1  315.37   12.80
   3 -10  -1  317.97   12.60
  -3 -10   1  338.57   13.30
  -3 -10   1  327.97   12.90
  -3 -10   1  331.87   13.80
  -4 -10  -1   25.70    3.60
   4 -10   1   17.80    2.80
  -4 -10  -1   30.20    4.20
  -4 -10  -1   33.10    4.10
  -4 -10   1   28.80    4.60
   4 -10  -1   25.80    4.10
  -4 -10   1   19.20    3.20
  -4 -10   1   33.40    4.20
   5 -10   1   12.40    2.50
  -5 -10  -1   11.50    3.60
  -5 -10  -1   12.90    2.30
   5 -10  -1   10.70    2.50
  -5 -10   1   12.50    2.30
   0 -11  -1  381.66   16.00
   0 -11  -1  396.96   15.20
   0 -11   1  414.36   15.90
   0  11   1  410.36   17.90
   0  11  -1  396.46   17.80
   0 -11   1  407.56   15.20
   1 -11   1  106.79   10.00
  -1 -11  -1   97.39    7.40
   1  11  -1   91.99    8.80
  -1  11   1  102.39    9.10
   1 -11   1   95.59    6.10
  -1 -11  -1   96.39    6.10
  -1  11  -1  114.39    9.10
   1 -11  -1   90.59    6.10
   1  11   1  112.39    9.10
  -1 -11   1   92.29    6.10
  -1 -11   1  105.49    7.20
   2 -11   1  346.37   12.90
  -2 -11  -1  355.06   14.10
  -2 -11  -1  329.97   13.40
  -2 -11  -1  338.17   13.10
  -2  11   1  314.97   15.40
   2  11  -1  327.57   19.40
  -2  11  -1  329.67   15.70
   2 -11  -1  340.67   13.00
   2  11   1  299.97   18.30
  -2 -11   1  332.07   14.10
  -2 -11   1  351.16   13.60
  -2 -11   1  352.36   13.20
  -3 -11  -1  160.58    7.50
   3 -11   1  151.78    7.30
  -3 -11  -1  148.79    7.90
  -3 -11  -1  148.49    7.40
  -3 -11   1  165.18    8.20
   3 -11  -1  158.08    7.50
  -3 -11   1  167.98    7.50
  -3 -11   1  146.99    7.40
  -4 -11  -1   31.50    3.40
  -4 -11  -1   30.00    3.80
  -4 -11  -1   30.10    4.70
   4 -11   1   29.50    4.20
   4 -11  -1   34.00    4.20
  -4 -11   1   30.20    3.40
  -4 -11   1   32.50    3.80
  -5 -11  -1   -0.30    1.90
  -5 -11   1    1.10    1.70
   0 -12   1  394.56   14.90
   0  12  -1  394.06   17.70
   0 -12   1  383.56   14.50
   0  12   1  407.56   16.60
   0 -12  -1  397.36   15.10
   0 -12  -1  376.76   14.40
   0 -12   1  387.16   16.10
   1  12  -1    7.20    3.20
   1 -12   1    3.90    2.80
  -1 -12  -1    4.50    2.40
  -1 -12  -1    6.70    3.80
  -1 -12  -1    8.10    2.70
  -1  12   1    8.40    4.10
   1 -12   1    2.80    2.20
  -1 -12   1    8.10    3.50
  -1 -12   1    5.70    2.40
   1  12   1    4.50    3.50
  -1 -12   1    4.50    2.50
   1 -12  -1    2.70    2.40
   1 -12  -1    9.70    3.20
  -1  12  -1   14.90    4.10
  -2 -12  -1  146.49    7.30
  -2 -12  -1  124.59    6.70
   2 -12   1  138.19    6.60
   2 -12   1  138.99    7.10
  -2 -12  -1  134.69    6.70
  -2 -12   1  144.79    7.30
   2 -12  -1  142.19    6.80
   2 -12  -1  136.79    7.50
  -2 -12   1  143.39    7.20
  -2 -12   1  134.89    6.70
   3 -12   1   17.00    2.80
  -3 -12  -1   12.10    3.60
   3 -12   1   17.40    2.70
  -3 -12  -1   13.90    2.50
  -3 -12  -1   22.20    3.10
  -3 -12   1   14.00    2.70
   3 -12  -1   19.70    3.00
  -3 -12   1   18.60    3.10
   3 -12  -1   28.40    4.70
  -3 -12   1   17.20    2.60
  -4 -12  -1   37.90    3.90
  -4 -12   1   37.30    3.10
   0 -13  -1   27.50    3.80
   0 -13   1   29.30    3.80
   0 -13   1   29.30    3.70
   0 -13  -1   27.80    4.50
   1 -13   1   33.00    3.70
   1 -13   1   22.70    2.70
  -1 -13  -1   25.00    2.70
   1 -13  -1   17.70    2.70
  -1 -13   1   21.50    2.70
  -1 -13   1   20.80    3.70
  -1 -13   1   29.90    3.30
   1 -13  -1   23.90    3.00
   2 -13   1   59.69    4.30
  -2 -13  -1   64.29    3.70
  -2 -13   1   59.89    7.20
  -2 -13   1   63.89    3.70
   0   0   2  314.37   10.80
   0   0   2  311.47   10.70
   0   0  -2  317.27   10.80
   1   0   2 1016.10   34.10
   1   0  -2  987.80   34.60
  -1   0   2 1003.50   33.80
  -1   0  -2 1082.29   34.40
   1   0   2  956.30   34.20
  -1   0   2  926.31   32.10
   1   0  -2 1021.90   34.00
  -2   0   2   95.99   10.10
  -2   0  -2  110.19    8.80
   2   0   2  104.09   10.30
   2   0  -2   94.09    7.60
  -2   0  -2  106.49    5.00
  -2   0   2  110.39    8.80
   2   0   2  103.99    5.60
  -2   0  -2   91.99   10.90
  -2   0   2  102.29    4.70
   2   0   2  108.59    8.40
   2   0  -2   96.39    9.40
   3   0   2  321.27   25.40
  -3   0  -2  324.57   19.70
   3   0  -2  297.37   24.50
   3   0   2  305.57   12.90
   3   0  -2  317.77   18.60
   3   0   2  297.57   19.50
  -3   0  -2  303.57   12.00
  -3   0   2  323.07   11.80
   3   0  -2  314.07   13.50
   4   0  -2  191.28   12.70
   4   0   2  215.78    8.60
   4   0   2  207.08   11.80
   4   0   2  219.68   26.50
   4   0  -2  214.68    8.70
   4   0  -2  201.68   24.90
  -4   0  -2  223.58   10.00
  -4   0   2  213.18    9.30
   5   0  -2  342.17   14.10
   5   0  -2  312.87   20.40
  -5   0  -2  364.46   14.70
   5   0   2  335.27   14.50
   5   0   2  343.77   13.10
  -5   0  -2  334.57   15.40
  -5   0   2  328.17   14.90
   5   0  -2  349.57   14.80
  -5   0  -2  344.37   15.50
   5   0   2  366.36   17.80
  -5   0   2  354.86   13.10
   5   0  -2  365.16   13.30
   5   0   2  332.57   13.80
   6   0  -2   30.20    4.40
  -6   0  -2   32.60    5.40
  -6   0   2   29.90    4.90
   6   0  -2   34.60   11.10
   6   0  -2   32.80    4.10
   6   0   2   31.20    4.40
   6   0   2   33.40    9.10
   6   0   2   31.30    4.50
   6   0  -2   28.10    3.70
  -7   0  -2   30.40    4.20
   7   0  -2   20.90    3.20
   7   0   2   29.40    4.90
   7   0   2   35.10    5.40
  -7   0   2   26.50    4.00
   7   0   2   10.50   11.80
   7   0  -2   25.80    3.70
  -8   0  -2   77.59    5.10
   8   0  -2   79.89    5.50
   8   0   2   76.59    5.90
  -8   0   2   88.29    4.50
   8   0  -2   79.99    6.10
   0   1   2 1113.79   37.10
   0  -1  -2 1173.18   37.30
   0  -1   2 1103.09   38.40
   0  -1  -2 1194.68   37.30
   0  -1   2 1143.29   38.40
   0   1  -2 1195.08   38.40
   0   1  -2 1202.68   38.50
  -1   1   2 7898.81  259.77
  -1  -1  -2 8149.08  261.27
   1   1  -2 8624.94  261.37
  -1   1   2 8381.66  259.97
   1  -1   2 8290.07  261.27
   1   1  -2 8569.94  261.87
  -1  -1  -2 7587.64  262.67
  -1   1  -2 8393.06  261.17
  -1  -1   2 7734.33  259.27
   1   1   2 7782.02  259.17
  -1   1  -2 7895.61  259.07
   1   1   2 7797.22  261.27
   1   1   2 8902.51  261.47
   1  -1  -2 8273.17  259.97
   1  -1  -2 8438.36  260.17
   2  -1   2 1718.03   56.89
   2   1  -2 1712.23   61.59
   2  -1   2 1692.23   60.59
   2   1  -2 1758.42   60.29
  -2  -1  -2 1800.32   61.09
  -2  -1  -2 1753.32   56.69
   2   1  -2 1689.43   56.79
   2  -1   2 1814.02   60.29
  -2   1   2 1734.03   59.49
  -2  -1  -2 1728.23   61.19
  -2   1   2 1740.23   55.79
   2   1   2 1678.93   56.69
   2   1   2 1827.02   61.89
  -2   1  -2 1806.32   60.49
  -2   1  -2 1697.93   56.29
   2  -1  -2 1788.42   59.29
   2   1   2 1739.53   60.49
   2  -1  -2 1791.62   59.89
  -2  -1   2 1677.93   60.89
  -2  -1   2 1707.03   56.49
  -3   1   2   22.20    2.60
   3   1  -2  -10.70   13.50
  -3  -1  -2   11.90    2.70
  -3  -1  -2   14.00    8.90
   3  -1   2   14.90    4.00
   3   1  -2   25.70    8.20
   3  -1   2   12.70    7.30
   3  -1   2   27.90   13.50
   3   1  -2   21.10    6.00
  -3   1   2   22.60    9.10
   3   1   2    9.80   15.20
  -3   1  -2   13.50    2.30
   3   1   2   16.10    3.30
   3  -1  -2   27.40    7.40
  -3  -1   2   16.10    2.80
   3  -1  -2   18.90    5.60
   3   1   2   21.40    8.60
  -3   1  -2    3.80    8.30
   3  -1  -2    4.40   10.30
  -4  -1  -2  145.59    8.30
   4   1  -2  145.69    6.70
  -4   1   2  141.49    6.30
   4   1  -2  161.88   25.10
   4   1  -2  148.19   10.20
   4  -1   2  145.39    6.50
   4  -1   2  148.19   25.40
  -4  -1  -2  109.69   22.90
   4  -1   2  143.29   10.40
  -4   1  -2  135.49    7.30
   4   1   2  139.49    6.50
   4  -1  -2  137.49    6.80
   4  -1  -2  193.98   23.80
   4   1   2  170.88   27.40
   4  -1  -2  134.19   12.80
  -4  -1   2  137.49    7.70
   4   1   2  144.09    9.40
   5   1  -2  115.69    7.20
   5   1  -2   92.69    8.00
  -5  -1  -2  117.59    8.30
  -5  -1  -2  102.79    8.50
  -5  -1  -2  122.39    9.00
   5   1  -2  127.19   11.70
  -5   1   2  113.49    7.90
   5  -1   2  108.09    6.00
   5  -1   2  111.19    7.80
   5  -1   2   95.29    7.20
   5  -1   2  109.39   13.20
   5   1  -2  104.59    6.00
  -5   1  -2  105.99    8.30
   5  -1  -2  102.29   13.20
   5  -1  -2   93.29    7.70
  -5  -1   2   85.39    7.80
   5   1   2  108.29   10.40
   5   1   2  109.79    6.80
  -5  -1   2  100.59   10.10
  -5  -1   2  109.99    7.40
   5   1   2  102.39    5.90
   5   1   2  113.39    7.90
   5  -1  -2  107.29    6.00
  -5   1  -2  114.69    7.00
   5  -1  -2   95.59    8.20
  -6  -1  -2  163.98   10.80
  -6   1   2  174.78    9.90
   6  -1   2  168.38    9.50
  -6  -1  -2  171.68   10.50
   6   1  -2  180.18    8.30
   6  -1   2  162.58   17.30
   6  -1   2  179.18    8.30
  -6  -1  -2  161.38   10.30
   6   1  -2  185.58   16.20
   6   1  -2  170.68    8.70
   6   1  -2  190.68    9.90
   6   1   2  163.48   14.00
   6   1   2  188.98    8.40
   6   1   2  187.78    9.80
   6  -1  -2  164.28    9.60
   6  -1  -2  185.68    8.40
  -6   1  -2  176.18   10.10
   6  -1  -2  184.68    9.10
  -6  -1   2  172.38   10.40
   7  -1   2    6.30    2.80
  -7   1   2    5.60    3.00
   7   1  -2    3.50    2.50
   7  -1   2   -2.70    2.80
  -7  -1  -2    8.20    3.50
   7   1  -2    0.90    2.90
  -7  -1   2    6.80    3.30
   7  -1  -2   -0.60    2.40
   7   1   2    4.10    9.30
  -7   1  -2    6.90    3.20
   7   1   2   -0.20    2.70
   7  -1  -2    2.30    2.70
   8  -1   2    6.20    2.20
   8  -1   2    8.90    2.40
  -8  -1  -2    4.40    2.30
   8   1  -2    7.60    2.10
  -8   1  -2    2.00    2.10
   8  -1  -2    3.20    1.80
   8   1   2    5.20    1.90
  -8  -1   2    6.90    2.10
   0   2   2    2.20    1.40
   0  -2   2    3.30    2.40
   0  -2   2    1.40    2.30
   0   2  -2    2.80    1.20
   0   2  -2    4.20    2.30
   0   2  -2    3.30    2.30
   0   2   2    2.30    1.40
   0  -2  -2    1.40    1.50
   1   2  -2 1758.52   62.29
  -1  -2  -2 1923.41   61.69
  -1   2   2 1787.62   58.99
   1   2  -2 1877.41   61.69
  -1  -2  -2 1791.52   61.39
   1   2  -2 1783.42   58.89
   1  -2   2 1880.71   61.39
  -1   2  -2 1820.32   61.09
   1   2   2 1892.41   61.29
  -1  -2   2 1742.73   61.79
   1   2   2 1817.52   58.69
   1   2   2 1848.72   61.59
  -1  -2   2 1787.02   59.09
  -1   2  -2 1775.22   58.59
   1  -2  -2 1884.61   59.59
   1  -2  -2 1890.31   59.39
  -2  -2  -2  576.14   19.80
   2   2  -2  558.64   26.50
   2   2  -2  570.94   24.10
  -2  -2  -2  550.84   24.30
  -2  -2  -2  541.25   26.50
   2   2  -2  562.24   19.80
   2  -2   2  528.35   24.00
   2  -2   2  523.75   20.10
  -2   2   2  531.85   21.90
   2  -2   2  566.24   23.20
   2  -2  -2  577.74   22.70
  -2   2  -2  576.94   23.60
   2   2   2  557.84   19.50
  -2  -2   2  554.24   19.60
   2  -2  -2  582.74   22.10
  -2  -2   2  541.75   26.10
   2   2   2  580.24   24.30
   2   2   2  593.14   26.70
  -2   2  -2  586.04   19.00
  -3   2   2  248.48   19.60
   3   2  -2  307.57   34.90
   3   2  -2  252.97   10.10
  -3  -2  -2  256.77   11.30
   3   2  -2  264.37   18.80
   3  -2   2  289.07   27.80
  -3  -2  -2  263.17   21.10
   3  -2   2  289.37   18.00
   3   2  -2  265.87   11.60
  -3   2  -2  302.07   10.40
   3  -2  -2  253.57   17.10
  -3   2  -2  280.97   21.00
   3   2   2  263.97   11.40
   3  -2  -2  250.37   22.50
   3   2   2  259.17   18.80
  -3  -2   2  266.37   11.20
   4   2  -2  149.59   10.00
   4   2  -2  174.08   29.30
   4   2  -2  148.49    7.00
   4  -2   2  150.18    7.00
   4  -2   2  176.28   27.90
  -4  -2  -2  145.19    7.60
  -4  -2  -2  170.58    9.30
   4  -2   2  175.48   12.80
   4  -2  -2  151.78    7.10
   4   2   2  148.29    7.00
  -4   2  -2  157.58    7.30
   4   2   2  139.09   20.90
   4   2   2  152.98    9.30
   4  -2  -2  157.08   33.20
  -4  -2   2  152.48    8.60
   5  -2   2  295.77   13.60
  -5  -2  -2  312.37   14.70
  -5   2   2  302.27   13.50
   5   2  -2  303.57   12.70
   5  -2   2  297.57   13.00
   5   2  -2  309.87   12.10
   5  -2   2  336.57   12.30
   5   2  -2  327.07   16.40
  -5  -2  -2  297.67   13.80
   5   2  -2  308.67   13.50
   5  -2   2  311.87   19.80
  -5  -2  -2  295.57   14.80
   5   2   2  305.87   15.40
   5   2   2  310.07   13.50
  -5   2  -2  317.37   13.80
   5   2   2  306.67   12.50
  -5  -2   2  316.17   14.60
   5  -2  -2  316.67   12.20
  -5  -2   2  311.47   14.20
   5  -2  -2  304.67   14.10
   5  -2  -2  298.87   13.50
   5   2   2  315.07   12.10
  -5  -2   2  318.17   14.00
   6  -2   2  221.28    9.60
  -6  -2  -2  220.98   11.20
   6  -2   2  237.38   12.50
  -6  -2  -2  226.28   12.40
   6   2  -2  222.18   11.10
   6  -2   2  207.68   21.80
   6   2  -2  206.88   15.70
  -6  -2  -2  214.58   12.40
  -6   2   2  220.18   10.90
   6   2  -2  218.28    9.90
   6   2  -2  225.08   10.10
   6   2   2  243.48   12.60
   6   2   2  207.38   14.80
  -6  -2   2  223.68   17.40
  -6  -2   2  200.88   11.10
   6  -2  -2  222.68   11.00
   6  -2  -2  221.58   10.40
   6  -2  -2  234.58    9.80
  -6   2  -2  242.18   11.30
   7  -2   2   70.99    5.70
  -7  -2  -2   76.39    6.80
   7  -2   2   66.19    5.10
   7   2  -2   63.69    5.50
  -7   2   2   67.49    5.80
   7   2   2   66.99    5.60
  -7  -2   2   72.39    6.40
   7  -2  -2   66.09    4.90
   7  -2  -2   74.79    5.80
  -7   2  -2   67.69    6.00
  -8  -2  -2    6.50    2.20
   8  -2   2   11.30    2.30
   8   2  -2    8.10    1.90
   8  -2   2   11.10    2.00
  -8  -2   2    9.30    2.20
   8   2   2    9.30    2.10
   8  -2  -2   10.80    2.10
   0  -3  -2 1178.18   39.50
   0   3   2 1172.48   39.20
   0   3  -2 1170.28   40.90
   0  -3   2 1178.18   41.30
   0   3   2 1177.88   39.10
   0   3  -2 1141.69   37.80
   0   3   2 1151.88   39.30
   1  -3   2 4750.82  154.48
   1   3  -2 4546.55  151.18
  -1  -3  -2 4698.13  156.28
   1   3  -2 4913.31  156.38
  -1   3   2 4150.58  151.48
   1  -3   2 4812.52  154.18
   1   3  -2 5168.38  155.38
   1  -3  -2 4820.72  152.08
   1  -3  -2 5047.29  152.48
   1   3   2 4629.84  150.78
  -1   3  -2 4669.53  150.68
  -1  -3   2 4764.42  151.68
   1   3   2 4560.14  154.68
  -1  -3   2 4935.21  155.88
  -2  -3  -2  805.32   36.40
   2  -3   2  802.02   33.70
  -2   3   2  843.12   30.60
   2   3  -2  795.22   37.60
   2   3  -2  849.02   28.70
   2   3  -2  842.12   34.10
  -2  -3  -2  844.32   29.10
   2  -3   2  821.82   29.80
   2  -3   2  907.61   33.00
   2   3   2  853.81   34.00
  -2   3  -2  851.41   27.60
   2  -3  -2  911.41   31.90
  -2  -3   2  831.42   37.40
   2   3   2  841.52   28.40
  -2   3  -2  762.42   32.90
   2  -3  -2  883.11   31.10
  -3  -3  -2  719.33   26.30
  -3  -3  -2  750.62   24.80
   3  -3   2  710.83   24.60
   3   3  -2  760.02   26.30
   3  -3   2  691.83   27.90
   3  -3   2  741.13   33.50
   3   3  -2  738.03   24.70
  -3  -3   2  730.83   24.80
  -3   3  -2  727.93   24.20
   3  -3  -2  761.12   31.90
   3   3   2  735.63   35.80
   3  -3  -2  665.83   35.30
   3   3   2  758.12   25.90
  -3  -3   2  732.63   26.20
  -4   3   2  309.57   14.00
   4   3  -2  318.67   12.10
   4   3  -2  347.07   34.10
  -4  -3  -2  319.47   14.10
   4  -3   2  319.07   12.10
   4  -3   2  287.57   34.40
  -4  -3  -2  319.17   12.30
  -4  -3  -2  338.37   14.80
  -4  -3  -2  316.87   13.20
   4   3  -2  337.07   14.90
   4   3  -2  322.47   13.10
   4   3   2  305.07   12.80
   4  -3  -2  314.37   12.20
  -4  -3   2  309.77   15.50
   4   3   2  327.27   14.30
  -4  -3   2  351.16   14.40
   4  -3  -2  341.17   30.60
  -4   3  -2  319.87   14.00
  -4  -3   2  329.97   14.30
   4   3   2  318.17   13.80
   4   3   2  322.47   12.20
  -4  -3   2  308.77   12.70
   4   3   2  257.47   35.10
  -4  -3   2  299.67   14.00
   5  -3   2  326.37   12.40
  -5  -3  -2  323.37   12.70
   5  -3   2  278.47   13.90
   5   3  -2  329.67   16.00
  -5  -3  -2  313.77   15.30
  -5  -3  -2  311.97   14.90
   5   3  -2  318.77   12.10
  -5   3   2  263.77   15.20
   5  -3  -2  309.47   12.20
  -5  -3   2  322.07   13.90
   5   3   2  301.77   12.30
  -5  -3   2  313.27   14.60
   5  -3  -2  303.67   13.70
   5   3   2  309.27   15.30
   5  -3  -2  296.97   14.30
   6   3  -2   36.10    5.70
  -6  -3  -2   28.40    5.50
   6  -3   2   33.90    4.40
  -6  -3  -2   26.90    9.90
  -6   3   2   35.90    5.90
   6   3  -2   38.90    5.90
  -6  -3  -2   41.40    6.20
   6   3  -2   35.40    4.60
   6  -3   2   38.70    6.00
  -6  -3   2   43.50    7.10
  -6  -3   2   30.80    5.20
   6  -3  -2   36.50    6.10
   6  -3  -2   47.00    4.60
  -6   3  -2   41.10    6.20
   6   3   2   35.00    4.70
   6   3   2   33.40    9.20
  -7  -3  -2   20.80    3.90
   7  -3   2   20.10    3.20
   7  -3   2   13.00    2.70
  -7   3   2   20.50    3.10
   7   3  -2   14.30    2.80
   7   3   2   16.40    3.00
   7  -3  -2   16.80    3.10
   7  -3  -2   22.60    3.70
  -7  -3   2   17.10    3.70
  -7   3  -2   18.90    3.20
   8  -3   2   69.49    4.00
  -8  -3  -2   67.19    4.50
   8  -3   2   67.39    4.10
   8   3  -2   63.79    3.80
   8  -3  -2   56.89    5.90
   8  -3  -2   65.99    3.90
  -8  -3   2   71.19    4.20
   0   4  -2   14.90    4.50
   0   4   2   13.70    4.10
   0  -4   2    4.80    6.40
   0   4   2    7.70    3.70
   0   4  -2   11.80    1.60
   0  -4   2   12.40    6.10
   0   4   2   15.90    5.30
   0   4  -2   10.50    5.20
   0  -4  -2   11.40    4.80
   1   4  -2 1137.69   38.50
   1  -4   2 1150.78   43.60
   1   4  -2 1154.88   43.90
  -1  -4  -2 1166.68   44.00
  -1   4   2 1151.08   38.80
   1  -4   2 1195.38   43.70
   1   4  -2 1208.78   43.40
  -1   4  -2 1090.09   43.30
  -1  -4   2 1155.18   45.90
  -1   4  -2 1171.58   37.70
   1   4   2 1207.28   42.80
   1  -4  -2 1193.28   40.50
  -1  -4   2 1169.18   39.40
   1  -4  -2 1250.67   41.10
   2   4  -2  468.95   17.10
   2  -4   2  478.75   26.50
   2  -4   2  459.35   25.40
  -2  -4  -2  420.56   33.30
   2   4  -2  467.35   24.10
  -2   4   2  453.35   19.20
  -2  -4  -2  461.05   18.30
  -2  -4   2  457.65   17.80
   2   4   2  489.85   24.40
   2   4   2  472.65   16.70
   2  -4  -2  487.25   21.50
   2  -4  -2  500.45   21.50
  -2   4  -2  470.35   24.20
   2  -4  -2  478.95   20.20
   3   4  -2   80.49   16.20
   3   4  -2   94.89    6.00
   3   4  -2   96.99    6.70
  -3  -4  -2   99.09    5.40
  -3  -4  -2   95.59    8.20
   3  -4   2   93.99    5.60
   3  -4   2   95.39   14.20
   3  -4  -2  100.39   16.40
   3   4   2   92.39    6.10
  -3  -4   2   93.29    5.50
  -3  -4   2   94.99    7.40
   4  -4   2   -0.30    2.20
  -4   4   2   -3.30    4.30
   4   4  -2    6.20    2.90
   4  -4   2    2.10    5.20
  -4  -4  -2   -2.50    3.30
   4   4  -2   -3.70    3.50
  -4  -4  -2    1.90    7.70
  -4  -4  -2    2.70    2.40
  -4  -4  -2    2.10    4.00
   4   4  -2   -1.50    3.20
  -4  -4   2   -2.80    4.10
  -4   4  -2    4.80    4.10
  -4  -4   2    0.60    4.00
   4   4   2   12.40   27.80
  -4  -4   2    7.40    6.00
  -4  -4   2    1.80    3.40
   4   4   2   -1.50    4.20
   4   4   2   -0.70    3.10
  -4  -4   2    2.30    3.10
   4  -4  -2  -26.10   21.40
  -5  -4  -2  137.19   11.20
  -5  -4  -2  148.09   11.30
  -5  -4  -2  141.69    8.10
  -5   4   2  147.19    8.70
   5   4  -2  150.98    8.90
   5   4  -2  149.59    7.80
   5  -4   2  154.48    7.30
   5  -4   2  140.59    9.30
  -5  -4  -2  132.09    9.00
   5   4  -2  145.59   10.80
   5   4  -2  144.29    7.50
  -5  -4  -2  143.29    8.10
   5  -4  -2  139.19    7.30
   5  -4  -2  136.99    9.70
  -5  -4   2  138.09   10.80
  -5   4  -2  142.79    8.90
   5   4   2  144.39   10.00
  -5  -4   2  141.59    9.20
   5  -4  -2  154.68   10.10
  -5  -4   2  139.89   10.60
   5   4   2  152.18    8.70
   6  -4   2    5.10    2.50
  -6  -4  -2    4.10    5.90
  -6  -4  -2    0.80    4.50
   6   4  -2    2.00    5.80
   6  -4   2    7.40    3.60
   6   4  -2    5.80    3.10
  -6  -4  -2    5.40    3.40
  -6   4   2    2.20    3.20
   6  -4  -2    3.80    2.50
   6  -4  -2    5.40    3.80
  -6   4  -2    7.20    3.20
   6   4   2    4.50    3.10
  -6  -4   2    8.60    4.20
   6   4   2   -1.20    5.10
  -6  -4   2   -6.60    5.40
  -6  -4   2    1.20    3.60
  -7  -4  -2  109.69    7.80
   7  -4   2  124.49    6.70
   7   4  -2  116.09    6.30
  -7  -4  -2  125.99    7.90
   7  -4   2  115.49    6.10
   7  -4  -2  113.99    6.10
  -7  -4   2  132.99    7.70
   7  -4  -2  132.19    7.10
   7   4   2  127.09    6.70
  -7   4  -2  115.19    6.40
   0   5  -2  519.65   16.90
   0   5  -2  531.95   23.10
   0   5   2  515.25   21.40
   0  -5   2  474.45   19.80
   0  -5  -2  479.35   23.30
   0  -5   2  494.15   27.70
   1  -5   2 1119.99   44.90
   1  -5   2 1129.59   44.80
   1   5  -2 1182.38   43.90
  -1   5   2  940.31   36.00
   1   5  -2 1144.19   36.30
   1   5  -2 1157.18   44.50
  -1  -5  -2 1116.59   46.00
  -1  -5   2 1094.79   37.80
  -1   5  -2 1021.00   42.10
   1  -5  -2 1094.29   40.10
  -1  -5   2 1053.79   49.40
   1   5   2 1085.79   42.70
   1   5   2 1128.59   42.40
  -2  -5  -2 2020.80   64.59
   2   5  -2 2013.40   65.29
  -2  -5  -2 1929.21   66.59
   2   5  -2 1960.60   73.89
   2   5   2 1917.01   72.89
   2   5   2 2037.80   64.59
   2  -5  -2 2050.79   68.59
   2  -5  -2 2039.60   70.59
  -2  -5   2 1979.10   64.59
  -2  -5   2 1977.00   66.39
   3   5  -2   -0.50   19.60
   3  -5   2   27.60   14.80
  -3  -5  -2   20.70    5.60
  -3  -5  -2   37.80    9.80
  -3  -5  -2   18.20    2.90
   3  -5   2   13.60    2.90
   3   5  -2   22.90    3.70
   3   5   2   32.00   20.80
  -3  -5   2   10.30    4.70
  -3  -5   2   22.10    3.00
   3   5   2   16.10    3.20
  -3  -5   2   18.80    4.10
   3  -5  -2    8.70   12.70
  -3  -5   2   20.00    5.20
  -4  -5  -2  351.76   20.00
   4  -5   2  358.96   16.50
   4  -5   2  402.06   14.50
   4   5  -2  385.96   14.80
  -4  -5  -2  405.26   18.50
   4   5  -2  391.86   16.60
  -4  -5  -2  409.36   14.80
  -4  -5  -2  376.56   15.50
  -4  -5  -2  397.96   16.20
  -4   5   2  371.26   15.60
   4   5   2  385.56   16.10
  -4  -5   2  376.76   16.10
  -4  -5   2  404.46   15.40
  -4   5  -2  393.76   15.80
   4  -5  -2  388.66   14.50
   4   5   2  362.16   15.80
  -4  -5   2  410.36   14.70
  -4  -5   2  373.06   18.30
  -4  -5   2  417.46   18.10
   5  -5   2   10.60    2.70
   5   5  -2    6.20    3.50
  -5  -5  -2   10.00    3.30
  -5   5   2    9.10    3.70
  -5  -5  -2   24.90    6.70
  -5  -5  -2    9.50    3.90
  -5  -5  -2   12.10    6.20
  -5  -5  -2   10.80    3.70
   5   5  -2   17.50    5.30
   5  -5   2   13.90    4.50
  -5   5  -2   17.20    3.80
  -5  -5   2    9.00    3.70
   5   5   2   17.20    4.70
  -5  -5   2    9.00    5.50
   5  -5  -2    9.80    5.30
  -5  -5   2   18.60    5.80
   5  -5  -2    8.00    2.80
   5   5   2   14.40    4.10
  -5  -5   2   15.50    4.30
  -6  -5  -2   36.40    6.70
   6   5  -2   46.20    6.90
  -6  -5  -2   34.20    5.40
  -6  -5  -2   32.90    7.20
   6  -5   2   34.40    5.50
   6   5  -2   39.30    5.50
   6  -5   2   38.90    4.40
   6   5   2   35.10    5.40
  -6  -5   2   28.70    6.70
  -6  -5   2   29.50    5.20
   6   5   2   34.10    6.20
   6  -5  -2   31.80    4.20
  -6  -5   2   43.10    5.90
   6  -5  -2   22.50    6.00
  -6   5  -2   31.40    4.40
   7  -5   2   66.69    4.50
  -7  -5  -2   78.29    8.30
   7   5  -2   45.60    4.50
   7  -5   2   59.89    4.90
   7  -5   2   58.29    4.90
  -7  -5  -2   55.59    5.90
   7  -5  -2   66.39    4.20
  -7  -5   2   62.19    5.60
   7  -5  -2   56.89    8.00
   7   5   2   66.49    6.60
   0  -6   2 1230.58   40.40
   1   6  -2  426.76   28.10
   1  -6   2  456.65   16.30
   1   6  -2  477.75   16.00
  -1  -6  -2  447.06   16.40
  -1  -6   2  476.25   19.70
  -2  -6  -2   66.89    4.70
   2   6  -2   68.19    5.00
  -2  -6  -2   59.59    8.90
   2  -6   2   68.89    5.10
  -2  -6   2   65.59    4.60
   2   6   2   63.89    3.80
   2  -6  -2   64.89   11.20
  -2  -6   2   63.89    8.90
   3   6  -2  164.48   13.90
   3   6  -2  179.08    9.10
  -3  -6  -2  171.58    8.00
   3  -6   2  129.19   39.60
  -3  -6  -2  187.48   10.90
  -3  -6  -2  166.28   10.00
   3   6  -2  115.79   40.60
  -3  -6  -2  182.98   13.90
   3  -6   2  178.18    8.00
  -3  -6   2  182.48    9.30
  -3  -6   2  198.88   12.60
  -3  -6   2  179.38    8.10
  -3   6  -2  174.88    9.70
   3  -6  -2  160.78    8.80
   3   6   2  190.78    8.30
   3   6   2  172.78   12.90
  -3  -6   2  163.18   10.30
   4  -6   2  627.44   21.20
  -4  -6  -2  611.44   25.70
   4   6  -2  588.94   22.80
  -4  -6  -2  593.44   21.90
   4  -6   2  597.04   22.90
  -4  -6  -2  585.84   21.30
  -4  -6  -2  605.64   22.60
   4  -6  -2  595.64   21.10
   4   6   2  555.34   22.20
  -4  -6   2  604.94   22.70
   4   6   2  598.64   22.00
  -4  -6   2  578.34   24.80
  -4  -6   2  575.94   21.70
  -4  -6   2  626.94   21.40
  -4  -6   2  582.84   24.80
  -5  -6  -2   96.79    6.60
  -5  -6  -2   97.89   11.40
   5   6  -2   85.29    7.20
  -5  -6  -2   85.69    7.50
   5   6  -2   81.39    9.00
  -5  -6  -2   82.99   12.20
   5  -6   2   81.39    8.10
  -5  -6   2   96.99   11.20
   5   6   2   88.89    8.40
  -5  -6   2   78.39   10.10
  -5  -6   2   90.99    7.50
  -5   6  -2   95.19    6.80
  -5  -6   2   85.69    6.70
   5   6   2   97.09    7.90
   6   6  -2   15.10    3.30
  -6  -6  -2   16.40    3.40
  -6  -6  -2    7.20    5.20
   6  -6   2   16.10    2.80
   6   6  -2    8.80    6.80
  -6  -6  -2   25.90    8.10
   6  -6   2   16.50    3.60
  -6  -6   2   13.30    7.60
  -6  -6   2   14.80    3.40
  -6   6  -2   12.60    3.30
   6  -6  -2   13.60    2.70
  -6  -6   2   17.60    4.80
   6   6   2   12.30    3.80
   6  -6  -2   16.20    4.50
   7  -6   2  154.78    6.90
  -7  -6  -2  165.58    8.50
  -7  -6  -2  158.38    7.40
   7  -6   2  170.38    9.20
   7  -6   2  160.58    7.30
   7  -6  -2  140.29    8.70
   7  -6  -2  158.58    6.80
  -7  -6   2  188.88    9.10
   0  -7  -2  141.89    7.70
   0   7  -2  142.39   10.80
   0  -7   2  145.39    6.90
  -1  -7  -2   24.60    3.20
   1   7  -2   17.60    5.60
   1  -7   2   26.50    3.30
  -1   7  -2   27.70    6.90
  -1  -7   2   23.70    3.70
   1   7   2   25.50    5.80
  -2  -7  -2  425.96   18.50
   2   7  -2  465.25   16.10
   2   7  -2  423.16   22.80
  -2  -7  -2  463.65   16.40
  -2  -7  -2  414.56   18.20
   2   7   2  451.15   19.90
  -2  -7   2  477.65   18.50
  -2   7  -2  460.35   17.60
  -2  -7   2  450.15   17.60
  -2  -7   2  416.36   20.80
  -2  -7   2  450.25   16.30
  -2   7  -2  418.16   20.40
   3   7  -2   71.69   10.60
  -3  -7  -2   99.89   14.80
   3   7  -2   80.99    6.30
   3  -7   2   79.69    5.40
  -3  -7  -2   85.99    5.70
  -3  -7  -2   91.99    8.10
  -3  -7  -2   82.59    7.40
  -3   7  -2   80.19    7.50
  -3  -7   2  108.29   11.50
  -3  -7   2   83.29    5.70
   3  -7  -2   71.59    6.30
  -3  -7   2   62.99    7.50
  -3  -7   2   88.89    6.80
   3   7   2   70.29    9.80
   4  -7   2   76.79    5.40
   4   7  -2   76.49    7.50
  -4  -7  -2   66.69    5.60
   4  -7   2   87.69    8.90
  -4  -7  -2   75.09    6.40
  -4  -7  -2   69.69    7.30
  -4  -7  -2   59.29    9.80
   4   7  -2   59.69    8.00
   4  -7  -2   68.09    5.80
  -4  -7   2   74.39   11.40
  -4  -7   2   90.19    6.00
  -4   7  -2   78.49    7.00
  -4  -7   2   68.59    6.40
  -4  -7   2   71.09    7.10
  -4  -7   2   59.69    9.10
   5   7  -2   84.49   10.10
  -5  -7  -2  111.59    7.90
   5  -7   2  109.09    8.10
   5   7  -2  107.59    7.80
   5  -7   2  115.59    6.40
  -5  -7  -2  122.99   14.40
  -5  -7  -2   92.39    6.80
  -5  -7  -2  110.59    6.70
  -5  -7   2  111.69   13.10
   5  -7  -2  104.19    6.40
  -5  -7   2   99.99    7.40
  -5  -7   2  112.99   11.10
  -5   7  -2  111.49    7.20
  -5  -7   2   95.79    6.70
   6  -7   2  115.39    7.60
  -6  -7  -2  141.89   11.40
   6  -7   2  125.19    6.30
   6  -7   2  143.49    7.60
  -6  -7  -2  132.29    7.00
  -6  -7   2  134.89    7.20
  -6  -7   2  127.49    8.90
   6  -7  -2  132.39    6.50
   0  -8  -2  149.59    7.40
   0   8   2  143.59   11.10
   0  -8   2  136.39   11.20
   0   8  -2  129.49   10.70
   0  -8   2  137.29    7.00
   1  -8   2   80.39    5.30
  -1   8   2   86.59   10.40
   1  -8   2   81.79   13.60
  -1  -8  -2   74.99    5.60
   1   8  -2   93.79    9.20
  -1  -8  -2   85.59   11.00
  -1  -8   2   90.99    8.60
   1  -8  -2   80.89    6.60
  -1   8  -2   83.89    7.40
  -1  -8   2   89.09    5.50
  -1   8  -2   84.99    9.60
   1   8   2   81.79    9.40
  -1  -8   2   68.29    9.10
   2   8  -2  123.19   10.50
  -2  -8  -2  115.49    9.50
  -2   8   2  105.89   12.70
  -2  -8  -2  126.99    9.20
   2  -8   2  119.69    6.60
  -2  -8  -2  139.29    7.00
  -2  -8   2  117.29    8.20
  -2  -8   2  113.09   16.30
  -2   8  -2  133.49   11.10
   2  -8  -2  102.69    7.00
   2   8   2  114.39   10.10
  -2  -8   2  121.19    9.10
  -2  -8   2  128.29    6.80
  -2   8  -2  117.99    8.10
   3  -8   2  386.46   14.10
   3  -8   2  355.16   20.80
  -3  -8  -2  359.36   14.30
  -3  -8  -2  375.66   15.40
  -3  -8  -2  370.66   15.80
   3   8  -2  375.26   17.60
  -3  -8   2  361.46   14.90
   3  -8  -2  368.36   14.10
  -3   8  -2  368.26   14.80
  -3  -8   2  368.86   15.80
   3   8   2  370.96   17.40
  -3  -8   2  364.26   21.20
  -3  -8   2  363.46   14.40
  -4  -8  -2   63.79    5.60
   4  -8   2   79.29    8.80
  -4  -8  -2   70.79   14.20
   4  -8   2   72.09    5.30
  -4  -8  -2   70.49    6.00
  -4  -8  -2   63.39    6.80
  -4  -8   2   59.29    6.80
  -4  -8   2   62.89    5.90
  -4  -8   2   61.39    5.80
   4  -8  -2   60.09    5.60
   5  -8   2   12.80    4.40
   5  -8   2    9.10    2.50
  -5  -8  -2   10.00    3.40
   5  -8   2    7.60    4.40
  -5  -8  -2   19.20    9.90
  -5  -8  -2    0.90    3.40
  -5  -8  -2    7.10    2.60
  -5  -8   2    5.10    3.10
  -5  -8   2   -8.60    8.20
  -5  -8   2    2.70    6.80
  -5  -8   2   11.80    3.00
   5  -8  -2    8.30    2.60
   5  -8  -2   12.40    5.20
   6  -8   2  103.59    5.40
   6  -8   2   84.59    7.30
   6  -8   2  111.69    7.50
  -6  -8  -2  110.19    5.80
  -6  -8   2  107.99    8.60
  -6  -8   2  107.29    5.60
   6  -8  -2  102.99    5.40
   0  -9   2   50.39    4.70
   0   9   2   74.59    8.90
   0  -9  -2   53.79    5.60
   0   9  -2   54.79    8.60
   1  -9   2   87.79    5.80
   1   9  -2   98.99    9.70
  -1  -9  -2   96.59   11.90
  -1  -9  -2  101.69    6.10
  -1  -9  -2   78.99   12.00
  -1   9   2   86.09    9.80
   1  -9  -2   94.79    6.40
  -1   9  -2   79.09    9.60
  -1  -9   2   73.99    8.40
   1   9   2   81.39    9.50
  -1  -9   2   91.99    6.00
  -1  -9   2   94.59    8.00
  -2   9   2    9.00    6.40
  -2  -9  -2    3.10    4.80
  -2  -9  -2   -0.80    2.70
   2  -9   2   -1.30    8.10
   2  -9   2    4.30    2.60
  -2  -9  -2    6.90    3.80
   2   9  -2   -2.40    5.00
   2   9   2    4.60    4.80
  -2  -9   2    5.50    2.60
   2  -9  -2    4.20    3.10
  -2  -9   2   -2.90    3.90
  -2   9  -2    3.60    5.50
  -2   9  -2   -0.50    3.90
  -2  -9   2    4.90    3.20
  -3  -9  -2   71.59    6.60
   3   9  -2   55.59    8.60
   3  -9   2   56.99    5.90
  -3  -9  -2   69.59    7.00
  -3  -9   2   27.10   17.90
  -3  -9   2   62.29    6.70
   3  -9  -2   61.09    5.80
  -4  -9  -2    8.10    3.40
  -4  -9  -2    0.60   13.50
   4  -9   2    8.90    2.70
  -4  -9  -2    5.10    2.90
  -4  -9  -2   13.20    3.00
  -4  -9   2   18.00   11.30
   4  -9  -2    7.50    2.90
  -4  -9   2    7.30    3.10
  -4  -9   2    6.40    2.70
  -4  -9   2    3.40    3.00
   5  -9   2   24.10    3.80
  -5  -9  -2   32.10    4.40
  -5  -9  -2   28.40    3.90
  -5  -9   2   28.10    3.60
  -5  -9   2   30.50    4.50
  -6  -9  -2   17.70    2.40
  -6  -9   2   24.10    3.40
   0 -10  -2   -2.40    5.10
   0  10  -2    4.30    4.90
   0  10   2    8.40    5.00
   0 -10   2    1.80    2.50
   0 -10   2    4.60    4.50
   0 -10   2    7.50    3.90
   0 -10  -2    5.10    2.70
  -1 -10  -2  128.79   10.00
   1 -10   2  124.69   10.30
   1  10  -2  126.99   10.10
  -1 -10  -2  121.19    7.20
  -1  10   2  138.89   10.50
  -1 -10  -2  135.29   10.10
   1 -10   2  137.89    7.20
   1 -10  -2  143.29   10.10
  -1 -10   2  119.99    9.20
   1  10   2  116.89   11.90
  -1  10  -2  130.19   10.50
  -1 -10   2  129.19    7.20
  -1 -10   2  128.09    8.80
  -2 -10  -2   70.09    7.10
   2 -10   2   72.29    9.30
  -2  10   2   61.69   10.40
  -2 -10  -2   69.09    5.80
   2 -10   2   80.49    5.70
  -2 -10  -2   85.59    7.70
   2  10  -2   82.29    9.00
  -2 -10   2   83.09    5.80
  -2 -10   2   80.09    7.30
  -2  10  -2   80.69    9.60
   2 -10  -2   65.09    6.00
  -2 -10   2   75.79    6.70
   2  10   2   82.39    8.80
  -3 -10  -2   17.90    3.60
  -3 -10  -2   13.50    2.90
  -3 -10  -2   22.00    4.10
   3 -10   2   17.10    3.00
   3 -10  -2   17.30    3.20
  -3 -10   2   20.10    3.20
  -3 -10   2   11.30    3.40
  -3 -10   2   18.40    3.30
   4 -10   2   12.10    2.60
  -4 -10  -2   13.00    3.10
  -4 -10  -2   13.60    2.70
   4 -10  -2   19.40    3.00
  -4 -10   2   15.40    3.20
  -4 -10   2   11.90    2.70
  -4 -10   2   16.50    2.80
  -5 -10  -2   10.90    2.20
   5 -10   2   15.10    2.40
  -5 -10  -2   11.90    2.40
  -5 -10   2   13.90    2.30
   5 -10  -2   10.70    2.60
   0 -11  -2  106.69    6.40
   0 -11  -2   98.19   10.90
   0 -11   2  105.09    6.40
   0 -11   2  115.49   12.20
   0  11  -2  107.39    8.80
   0  11   2  122.79    9.20
   0 -11   2   90.59    7.10
  -1 -11  -2  167.68   10.20
  -1 -11  -2  166.48    8.20
   1 -11   2  173.18    8.10
  -1  11   2  160.08   12.10
   1 -11   2  173.18   10.70
  -1 -11  -2  187.78   10.80
   1  11  -2  169.38   10.80
  -1 -11   2  169.68    8.20
  -1 -11   2  163.48    9.00
   1  11   2  178.48   11.00
   1 -11  -2  178.68    8.40
  -1  11  -2  178.58   10.70
   2 -11   2  150.88    7.50
   2  11  -2  152.78   10.30
  -2 -11  -2  152.38    7.50
  -2  11   2  140.99   11.10
  -2 -11  -2  151.28    8.90
  -2 -11  -2  149.99    8.10
  -2 -11   2  152.18    7.60
  -2 -11   2  166.38    8.70
  -2  11  -2  136.89   10.10
  -2 -11   2  166.08    8.10
   2 -11  -2  153.58    7.70
  -3 -11  -2   86.19    5.50
   3 -11   2   84.09    5.40
  -3 -11  -2   87.79    6.10
  -3 -11  -2   96.29    5.50
  -3 -11   2   90.29    5.40
  -3 -11   2   97.49    6.30
  -3 -11   2   83.89    5.60
  -4 -11  -2    4.50    2.20
  -4 -11  -2    3.90    2.80
   4 -11   2    0.80    2.20
  -4 -11  -2    3.80    1.90
  -4 -11   2    3.90    2.00
   4 -11  -2    7.90    2.70
  -4 -11   2    3.20    2.10
  -5 -11  -2   37.40    3.50
  -5 -11   2   32.40    3.30
   0 -12   2  122.39    8.30
   0 -12   2  131.29    6.70
   0  12  -2  133.59    8.70
   0 -12   2  135.59    7.10
   0 -12  -2  130.29    6.60
   0 -12  -2  135.29    7.70
   0  12   2  141.99    8.90
  -1 -12  -2  127.29    6.70
  -1 -12  -2  120.09    8.50
   1 -12   2  146.29   10.40
   1  12  -2  153.68    8.80
   1 -12   2  122.29    7.00
   1 -12   2  121.59    6.50
  -1 -12  -2  136.09    7.30
  -1 -12   2  141.09    7.10
  -1 -12   2  131.09    7.80
  -1  12  -2  133.89    8.40
   1 -12  -2  119.99    7.60
  -1 -12   2  123.99    6.50
   1 -12  -2  125.99    6.60
   2 -12   2   22.80    3.20
  -2 -12  -2   24.60    3.90
  -2 -12  -2   25.80    3.70
   2 -12   2   28.60    4.40
  -2 -12  -2   26.50    3.90
  -2  12  -2   23.50    6.90
  -2 -12   2   28.70    4.20
   2 -12  -2   28.40    5.50
  -2 -12   2   35.50    3.80
  -2 -12   2   35.70    4.50
   2 -12  -2   29.50    4.40
  -3 -12  -2   50.59    4.20
  -3 -12  -2   49.20    4.70
   3 -12   2   54.49    4.10
   3 -12   2   51.59    4.30
  -3 -12  -2   51.39    3.80
  -3 -12   2   53.09    4.20
   3 -12  -2   59.19    5.80
  -3 -12   2   53.79    3.80
   3 -12  -2   50.69    5.40
  -3 -12   2   57.39    4.70
  -4 -12   2  120.69    5.30
   0 -13   2   -4.10    2.00
   0 -13  -2    4.40    2.30
   0 -13  -2   -3.20    2.20
   0 -13   2   -1.00    1.90
   1 -13   2   16.10    2.40
  -1 -13  -2   14.80    2.50
   1 -13   2   16.30    2.40
  -1 -13  -2   15.50    2.30
   1 -13  -2   17.80    3.00
   1 -13  -2   18.30    2.80
  -1 -13   2   22.00    2.90
  -1 -13   2   12.60    2.40
  -2 -13  -2   73.29    4.10
   2 -13   2   68.29    4.40
  -2 -13   2   66.69    4.80
  -2 -13   2   83.19    4.00
   0   0  -3   -1.10    0.80
   0   0   3    0.70    0.90
  -1   0  -3 1166.88   40.00
  -1   0   3 1185.68   39.40
   1   0  -3 1195.98   39.30
  -1   0   3 1127.59   37.60
   1   0   3 1111.79   40.80
   1   0  -3 1264.47   39.80
   1   0   3 1164.38   40.10
   2   0   3  495.35   18.00
  -2   0  -3  508.45   17.70
   2   0   3  533.45   21.60
  -2   0   3  532.15   17.30
   2   0   3  481.55   22.30
  -2   0  -3  517.45   21.70
   2   0  -3  517.85   22.10
  -2   0   3  483.85   21.90
   2   0  -3  525.95   20.80
   3   0   3  608.84   35.00
  -3   0   3  646.24   21.40
   3   0   3  663.53   29.80
  -3   0  -3  639.34   22.00
  -3   0  -3  615.54   29.90
   3   0   3  591.34   22.40
   3   0  -3  657.33   28.50
   3   0  -3  557.54   31.90
   3   0  -3  621.74   23.20
   4   0   3  278.37   29.50
  -4   0  -3  342.87   13.60
  -4   0   3  342.07   12.60
   4   0   3  330.47   12.20
   4   0  -3  293.67   15.80
   4   0  -3  324.77   12.30
   4   0   3  329.97   15.10
   4   0  -3  361.46   28.90
  -5   0  -3   66.89    8.20
   5   0  -3   57.59    4.70
   5   0   3   61.39    8.20
  -5   0  -3   69.29    7.80
   5   0  -3   50.19    6.50
   5   0   3   58.59    4.80
   5   0  -3   55.59    6.90
   5   0   3   65.59    6.70
   5   0   3   62.39    5.90
  -5   0   3   62.29    7.20
  -5   0  -3   65.19    6.60
  -5   0   3   54.19    4.40
  -6   0  -3   50.49    6.90
  -6   0  -3   41.90    6.90
   6   0  -3   39.20   11.90
   6   0  -3   51.69    4.70
   6   0  -3   48.30    5.50
   6   0   3   45.20    6.00
   6   0  -3   53.89    6.60
   6   0   3   48.30    4.90
  -6   0   3   54.59    6.80
   6   0   3   32.10    8.40
  -7   0  -3   11.80    3.50
   7   0  -3   12.70    3.00
  -7   0   3   13.70    3.30
   7   0  -3   11.80    2.60
   7   0   3   13.90    3.70
   7   0   3    8.30    3.10
   7   0   3   -3.00   13.00
   8   0   3  110.69    5.70
   8   0  -3  106.29    5.10
  -8   0   3  101.79    5.00
  -8   0  -3  103.09    5.30
   0  -1  -3 1536.45   49.10
   0  -1   3 1494.15   50.59
   0   1  -3 1543.45   50.39
   0  -1   3 1521.45   50.49
   0   1  -3 1621.14   50.69
   0   1   3 1475.95   48.90
  -1  -1  -3 2829.72   89.49
  -1   1   3 2612.34   87.69
  -1  -1  -3 2679.13   89.29
   1   1  -3 2794.12   89.39
   1  -1   3 2667.33   89.59
   1  -1  -3 2745.93   87.89
  -1   1  -3 2903.81   89.69
  -1  -1   3 2658.13   87.29
  -1  -1   3 2621.24   89.49
  -1   1  -3 2616.14   87.19
   1   1   3 2639.34   87.19
   1   1   3 2947.31   89.59
   1  -1  -3 2814.62   88.09
   1   1   3 2734.43   89.49
  -2   1   3  836.22   31.60
   2  -1   3  852.51   29.20
   2  -1   3  749.82   39.70
   2  -1   3  861.01   32.50
   2   1  -3  860.51   29.20
  -2  -1  -3  845.92   33.60
   2   1  -3  908.21   32.70
  -2  -1  -3  844.22   28.90
   2   1  -3  866.81   35.70
  -2  -1  -3  840.52   33.00
  -2   1   3  887.31   27.70
   2   1   3  815.42   28.80
  -2   1  -3  944.21   34.20
   2   1   3  873.51   33.00
  -2  -1   3  865.31   28.70
   2  -1  -3  930.91   31.60
   2  -1  -3  840.02   31.90
   2   1   3  860.81   34.20
  -2   1  -3  866.41   28.70
  -2  -1   3  828.62   33.50
   3   1  -3  350.66   29.80
   3  -1   3  334.57   19.80
  -3  -1  -3  343.07   13.40
  -3  -1  -3  334.87   25.80
   3  -1   3  328.07   27.60
  -3   1   3  340.27   11.80
   3   1  -3  340.97   20.50
   3  -1  -3  324.67   15.60
  -3  -1   3  353.56   13.00
  -3   1  -3  354.76   12.90
   3   1   3  342.17   13.70
   3  -1  -3  326.37   18.80
   3   1   3  340.17   21.50
   3  -1  -3  370.56   24.30
  -3   1  -3  304.67   21.30
   4  -1   3  165.18   26.50
   4   1  -3  149.99   23.30
  -4  -1  -3  182.08   25.80
   4   1  -3  190.88    8.00
   4  -1   3  165.08   11.20
   4   1  -3  203.38   11.70
  -4  -1  -3  172.88    9.00
  -4   1   3  181.28    6.70
  -4  -1  -3  191.18    9.80
   4  -1   3  194.38    7.90
   4   1   3  171.78   27.20
  -4   1  -3  192.48    9.00
   4  -1  -3  199.18    8.20
  -4  -1   3  198.78    9.10
   4  -1  -3  171.68   24.90
   4   1   3  188.58   10.60
   4   1   3  190.08    7.90
   4  -1  -3  190.88   19.00
   5  -1   3   51.09    6.80
   5   1  -3   54.39    6.60
   5  -1   3   52.09    6.00
  -5  -1  -3   70.79    7.30
   5   1  -3   67.89   10.80
  -5  -1  -3   59.59    7.30
   5  -1   3   59.79    4.80
   5   1  -3   57.79    6.20
  -5   1   3   63.79    7.00
  -5  -1  -3   75.29    7.80
   5  -1   3   68.19    9.30
   5   1  -3   60.69    4.80
  -5   1  -3   58.99    6.10
   5  -1  -3   58.39    7.50
  -5  -1   3   62.69    6.00
   5  -1  -3   56.99    4.70
   5  -1  -3   47.60    6.80
  -5  -1   3   57.79    7.40
   5   1   3   49.90    5.60
   5   1   3   54.09    8.80
   5   1   3   57.89    6.70
  -5   1  -3   64.49    7.50
   5   1   3   54.59    4.70
   6   1  -3  322.07   12.40
  -6   1   3  315.17   13.80
  -6  -1  -3  315.07   14.10
   6   1  -3  293.57   12.80
  -6  -1  -3  285.97   14.30
   6  -1   3  283.27   19.90
   6   1  -3  311.37   13.70
   6  -1   3  330.17   12.40
   6  -1   3  310.17   13.60
  -6  -1  -3  318.17   14.60
   6   1  -3  268.67   20.00
  -6  -1   3  308.77   14.20
   6   1   3  304.57   13.50
   6   1   3  292.27   17.50
   6   1   3  327.47   12.40
   6  -1  -3  322.47   13.80
   6  -1  -3  323.97   12.50
  -6   1  -3  325.87   14.20
   6  -1  -3  325.07   13.30
  -7   1   3   29.80    4.90
   7  -1   3   17.60    3.30
   7   1  -3   26.30    3.30
  -7  -1  -3   19.30    3.80
   7   1  -3   27.60    4.50
   7  -1   3   20.70    3.50
  -7  -1   3   14.70    3.40
   7   1   3   19.00    3.20
   7  -1  -3   23.70    3.70
  -7   1  -3   18.40    3.60
   7  -1  -3   17.20    2.70
   7   1   3   12.00    9.10
  -8  -1  -3   19.10    3.40
   8   1  -3   28.10    3.00
   8  -1   3   24.00    3.70
   8  -1   3   25.30    3.10
  -8   1  -3   22.60    3.30
   8  -1  -3   28.90    3.20
  -8  -1   3   31.10    3.40
   8   1   3   21.80    3.10
   0   2  -3 9274.07  282.07
   0  -2  -3 9043.79  280.07
   0   2   3 8529.25  279.57
   0   2   3 8405.06  279.57
   0   2  -3 8633.34  279.57
   0  -2   3 8589.04  282.17
   0   2  -3 9679.53  285.97
   0  -2   3 8643.64  281.87
   0   2   3 8654.03  281.07
  -1  -2  -3 5845.42  180.38
   1   2  -3 5451.65  177.78
  -1  -2  -3 5434.56  180.08
   1   2  -3 5800.82  180.78
   1  -2   3 5617.24  180.58
   1   2   3 5204.88  177.28
   1   2   3 5696.93  179.98
  -1   2  -3 5415.96  177.38
  -1  -2   3 5719.93  181.18
   1   2   3 5522.35  180.18
   1  -2  -3 5587.94  177.88
  -1   2  -3 5962.50  180.58
  -1  -2   3 5399.66  177.78
   2   2  -3   27.70    3.80
  -2  -2  -3   32.00    9.30
  -2  -2  -3   39.40    6.50
   2   2  -3   35.20    9.50
  -2   2   3   23.30    4.80
   2  -2   3   36.20    5.10
  -2  -2  -3   28.90    4.00
   2  -2   3   28.80    5.50
   2   2  -3   30.10    6.00
   2  -2   3   43.10    8.00
   2  -2  -3   31.10    5.10
  -2  -2   3   26.70    3.40
  -2   2  -3   32.40    6.30
  -2  -2   3   44.70    9.40
   2   2   3   30.20    9.00
   2   2   3   23.20    5.60
  -2   2  -3   24.50    3.00
   2  -2  -3   34.00    4.80
   3   2  -3 1547.55   52.79
   3  -2   3 1590.94   64.79
   3  -2   3 1610.34   59.49
  -3  -2  -3 1579.64   51.39
  -3  -2  -3 1560.74   60.69
   3   2  -3 1520.05   69.39
  -3  -2  -3 1541.65   52.59
   3   2  -3 1569.34   51.29
   3  -2   3 1646.54   52.19
   3   2  -3 1585.94   60.09
   3   2   3 1568.74   52.49
  -3  -2   3 1592.54   52.39
   3  -2  -3 1555.44   59.89
  -3   2  -3 1617.94   51.69
   3  -2  -3 1584.94   57.29
   4  -2   3  455.05   33.50
   4  -2   3  496.55   17.60
   4   2  -3  505.25   20.50
   4   2  -3  428.46   36.40
   4   2  -3  493.35   17.60
  -4  -2  -3  528.05   19.90
   4  -2   3  471.35   21.40
   4   2   3  481.55   35.80
   4   2   3  508.65   19.90
  -4   2  -3  474.65   19.90
   4   2   3  528.05   23.40
  -4   2  -3  517.25   18.10
  -4  -2   3  519.85   19.30
   4  -2  -3  487.65   33.40
   4   2   3  503.35   17.60
   4  -2  -3  513.65   17.80
  -5  -2  -3  809.92   29.40
   5   2  -3  863.41   32.20
   5   2  -3  820.12   28.80
  -5  -2  -3  803.92   28.50
   5  -2   3  864.01   28.50
   5   2  -3  827.12   28.30
  -5  -2  -3  814.42   30.60
  -5   2   3  825.22   29.50
  -5  -2  -3  810.02   30.70
   5  -2   3  820.32   29.50
   5  -2   3  795.22   33.60
  -5  -2   3  824.32   30.40
   5  -2  -3  851.01   28.40
   5   2   3  832.42   31.40
  -5   2  -3  841.52   30.00
   5   2   3  853.91   28.20
   5  -2  -3  808.22   29.30
  -5  -2   3  822.22   29.60
   5  -2  -3  832.42   29.80
  -5  -2   3  827.62   29.70
  -5   2  -3  825.22   27.30
   5   2   3  813.52   29.40
   6   2  -3   48.60    6.00
   6   2  -3   47.90    6.20
   6  -2   3   46.50    4.60
   6   2  -3   37.50    9.10
  -6  -2  -3   37.80    6.10
  -6  -2  -3   37.40    6.10
   6  -2   3   47.40   12.40
   6  -2   3   38.80    5.90
   6   2  -3   42.00    5.10
  -6  -2  -3   55.39    6.60
  -6   2   3   35.70    6.00
   6   2   3   42.60    6.00
   6  -2  -3   49.60    4.90
  -6   2  -3   42.90    6.40
   6   2   3   41.80    7.70
   6  -2  -3   47.20    6.70
  -6  -2   3   43.00    6.80
   6  -2  -3   54.09    5.60
   7  -2   3   55.59    5.00
  -7  -2  -3   58.89    6.50
   7  -2   3   50.69    5.20
  -7   2   3   57.69    5.20
   7   2  -3   53.99    5.20
   7  -2  -3   60.89    5.70
  -7  -2   3   50.69    5.90
   7   2   3   69.09    5.50
  -7   2  -3   51.19    5.60
   7  -2  -3   52.29    4.50
   8   2  -3    1.30    1.70
   8  -2   3   -1.90    1.70
   8  -2   3    1.30    2.10
   8   2   3    4.00    2.30
  -8  -2   3    0.80    2.00
   8  -2  -3    1.60    2.60
   0   3   3 1025.30   33.90
   0  -3   3 1001.00   36.80
   0   3   3 1014.70   33.80
   0   3  -3 1076.29   36.90
   0  -3   3  934.31   33.90
   0   3  -3 1056.49   36.40
   0   3  -3  993.60   33.20
   0  -3  -3 1043.40   34.60
   1  -3   3 3440.06  113.19
   1  -3   3 3337.97  112.79
   1   3  -3 3562.64  113.49
  -1  -3  -3 3385.46  112.69
   1   3  -3 3313.17  109.39
   1  -3  -3 3478.95  109.59
  -1  -3   3 3414.46  109.79
  -1   3  -3 3536.75  112.99
   1   3   3 3303.07  108.79
  -1  -3   3 3390.16  114.09
  -1   3  -3 3288.47  108.99
   1   3   3 3391.56  112.79
   1  -3  -3 3485.95  109.99
   1   3   3 3555.84  112.39
   2   3  -3  931.91   31.90
   2   3  -3  930.31   42.10
   2  -3   3  954.00   37.90
   2  -3   3  917.31   32.70
   2   3  -3  932.81   37.20
  -2  -3  -3  931.51   32.20
  -2  -3  -3  913.91   39.30
  -2  -3  -3  965.00   38.00
   2  -3  -3  981.50   34.30
   2  -3  -3  994.80   33.70
  -2  -3   3  907.41   32.00
  -2   3  -3  925.21   30.90
   2   3   3  969.50   36.90
  -2   3  -3  917.01   36.90
   2   3   3  936.61   31.50
  -3  -3  -3  824.12   29.50
   3   3  -3  863.21   29.60
   3   3  -3  850.41   27.80
   3  -3   3  848.32   27.80
   3   3  -3  783.62   37.30
   3  -3   3  810.92   30.70
   3  -3   3  832.22   37.10
  -3  -3  -3  845.32   27.90
  -3   3  -3  847.32   27.70
  -3   3  -3  782.82   43.70
   3  -3  -3  808.62   38.10
  -3  -3   3  826.52   29.30
   3   3   3  811.72   38.80
   3   3   3  849.32   29.00
   3  -3  -3  846.92   34.20
  -3  -3   3  822.72   27.90
  -4  -3  -3  263.67   12.80
   4  -3   3  281.97   13.00
   4   3  -3  273.67   11.70
   4   3  -3  273.47   32.70
   4   3  -3  270.27   10.60
   4   3  -3  286.27   13.50
  -4  -3  -3  273.97   10.90
  -4  -3  -3  274.67   11.80
  -4  -3  -3  266.57   13.30
   4  -3   3  280.37   15.80
  -4   3   3  266.87   12.60
   4  -3   3  257.27   17.40
   4  -3   3  246.98   35.10
  -4   3  -3  270.97    9.90
   4  -3  -3  309.27   31.50
   4   3   3  292.17   35.40
   4  -3  -3  267.67   10.80
   4   3   3  269.27   11.00
   4   3   3  275.77   12.70
  -4   3  -3  269.37   12.70
  -4  -3   3  277.77   12.80
  -4  -3   3  252.87   13.80
  -4  -3   3  260.67   12.70
   4   3   3  275.47   12.20
   4   3   3  265.87   11.50
   5   3  -3   46.50    6.70
   5   3  -3   39.70    6.60
  -5  -3  -3   41.00    5.90
  -5  -3  -3   40.70   10.30
   5  -3   3   30.20   10.20
   5   3  -3   38.50    4.60
  -5  -3  -3   27.70    5.90
   5  -3   3   35.00    4.10
   5  -3  -3   40.90    5.50
   5  -3  -3   61.69    8.60
   5   3   3   34.00    6.00
  -5  -3   3   29.70    5.10
   5  -3  -3   40.70    4.50
  -5  -3   3   46.10    7.20
  -6  -3  -3  118.09    9.90
  -6  -3  -3  117.29    8.00
  -6   3   3  120.19    7.60
   6   3  -3  113.09    6.70
   6   3  -3  108.19    7.20
   6  -3   3  126.79    6.70
   6   3  -3  101.19    7.60
   6  -3   3  125.29    7.90
  -6   3  -3  121.89    8.10
  -6  -3   3  111.79    8.70
   6  -3  -3  122.09    8.00
   6  -3  -3  107.59    7.40
   6  -3  -3  114.49    6.60
  -6  -3   3   97.29   12.10
   6   3   3  122.49    7.60
  -6  -3   3  108.69    8.80
   7  -3   3   -1.70    2.30
  -7   3   3    0.80    2.80
   7   3  -3    4.90    2.60
  -7  -3  -3    2.30    3.40
   7  -3   3    6.50    2.60
   7   3   3   -1.00    2.70
   7  -3  -3    3.10    2.70
   7  -3  -3    0.60    2.00
  -7  -3   3    0.20    3.00
  -7   3  -3    0.40    2.60
   8   3  -3   61.19    3.70
   8  -3   3   61.19    3.60
  -8  -3  -3   58.19    4.40
   8  -3   3   62.89    3.80
  -8  -3   3   62.69    4.00
   8  -3  -3   63.49    4.00
   0   4  -3  405.56   14.20
   0  -4   3  391.76   15.70
   0  -4   3  431.56   20.60
   0   4  -3  411.16   19.30
   0   4  -3  424.46   18.70
   0  -4  -3  403.96   17.20
   0   4   3  415.86   16.50
   1  -4   3 1251.57   43.40
  -1  -4  -3 1146.79   49.10
   1   4  -3 1262.07   42.10
   1   4  -3 1352.26   47.40
   1   4  -3 1386.66   48.40
   1  -4   3 1256.57   47.70
   1  -4   3 1295.17   47.90
  -1  -4   3 1228.08   49.80
   1  -4  -3 1340.47   43.50
   1   4   3 1295.67   41.00
   1   4   3 1295.97   47.70
  -1   4  -3 1289.97   41.50
   1   4   3 1235.58   41.40
  -1   4  -3 1300.57   46.80
   2   4  -3  107.49   13.80
  -2  -4  -3  133.59    8.90
  -2  -4  -3  198.48   24.00
   2   4  -3  129.89    6.80
   2  -4   3  128.09   10.90
   2  -4   3  127.39   20.60
   2  -4   3  134.99   18.20
   2  -4  -3  139.69   11.60
   2  -4  -3  140.89   10.10
  -2  -4   3  129.29    7.60
   2   4   3  134.19   14.90
  -2   4  -3  135.69    5.40
   2  -4  -3  132.29   12.00
   2   4   3  136.19    6.10
   3   4  -3  213.48   23.00
   3   4  -3  239.78   10.90
   3   4  -3  219.18    9.40
  -3  -4  -3  222.48    9.30
   3  -4   3  216.58    9.30
   3  -4   3  231.58   22.30
  -3  -4  -3  243.48   12.10
  -3  -4   3  244.68   11.50
   3   4   3  240.08   10.30
   3  -4  -3  223.38   18.50
  -3  -4   3  238.08    9.50
  -4   4   3   35.60    5.20
   4   4  -3   34.10    5.40
  -4  -4  -3   35.80    5.70
  -4  -4  -3   33.90    9.00
  -4  -4  -3   32.60    4.80
   4   4  -3   32.70    3.90
   4  -4   3   29.30    5.40
   4  -4   3   38.20    4.00
   4   4  -3   27.90    3.90
  -4  -4  -3   42.10    4.40
   4  -4  -3   32.50   22.10
  -4  -4   3   37.10    5.60
  -4  -4   3   25.40    3.70
  -4   4  -3   38.50    6.50
   4   4   3   59.79   31.50
  -4  -4   3   37.10    6.20
  -4  -4   3   29.90    6.10
   4   4   3   35.60    5.00
  -4  -4   3   31.50    5.10
   4   4   3   31.60    5.50
   5  -4   3  288.07   11.40
  -5  -4  -3  264.87   14.90
  -5   4   3  279.67   12.30
   5   4  -3  286.67   11.50
   5   4  -3  276.77   14.80
  -5  -4  -3  293.07   15.50
   5   4  -3  266.47   11.30
   5  -4   3  276.87   12.80
  -5  -4  -3  268.77   11.80
  -5  -4  -3  274.77   12.80
  -5  -4  -3  275.37   11.60
   5  -4  -3  279.47   13.40
   5   4   3  282.07   12.70
  -5   4  -3  279.57   12.80
   5  -4  -3  274.57   11.30
  -5  -4   3  269.47   12.90
   5   4   3  276.57   13.80
   5  -4  -3  261.27   13.80
  -5  -4   3  293.07   14.30
  -5  -4   3  292.07   14.20
  -6   4   3   27.30    3.80
  -6  -4  -3   32.60    5.50
   6   4  -3   16.90    3.60
  -6  -4  -3   31.50    6.70
   6  -4   3   16.40    3.00
  -6  -4  -3   19.80    4.00
   6  -4   3   23.80    3.80
   6   4  -3   23.50    6.90
  -6  -4   3   25.40    6.00
   6   4   3   24.10    3.80
  -6  -4   3   25.40    4.30
   6   4   3   22.80    5.70
  -6   4  -3   23.00    4.10
   6  -4  -3   30.90    4.20
   6  -4  -3   22.80    4.50
  -6  -4   3   29.50    5.10
  -7  -4  -3    7.30    3.60
  -7  -4  -3    5.10    3.50
   7   4  -3   10.60    2.60
   7  -4   3   10.00    2.50
   7  -4   3    9.40    2.80
   7   4   3    6.10    2.80
   7  -4  -3    9.10    2.40
  -7   4  -3   11.60    2.70
  -7  -4   3    5.40    3.10
   7  -4  -3   14.30    3.10
   0   5   3   50.09    6.90
   0  -5  -3   67.69    9.00
   0   5  -3   64.09    3.60
   0   5   3   76.49    9.90
   0   5  -3   58.19    9.70
   0  -5   3   64.79    7.80
   0   5  -3   74.59   11.00
   0  -5   3   52.99   13.70
   1  -5   3 1175.98   48.10
   1  -5   3 1081.49   47.90
   1   5  -3 1235.88   38.30
   1   5  -3 1139.69   44.90
  -1  -5  -3 1176.68   48.00
  -1   5  -3 1143.99   37.10
   1  -5  -3 1218.78   41.00
  -1  -5   3 1117.69   39.50
  -1  -5   3 1051.29   52.49
   1   5   3 1094.79   44.10
   1   5   3 1224.08   44.10
  -2  -5  -3  438.46   15.90
   2   5  -3  458.05   27.90
   2  -5   3  430.16   15.70
   2   5  -3  444.86   16.60
   2   5  -3  449.26   30.20
  -2  -5   3  438.76   15.80
  -2  -5   3  452.25   18.00
   2   5   3  454.45   15.50
   2  -5  -3  462.25   19.80
   2   5   3  407.36   26.60
   2  -5  -3  441.36   22.70
   3   5  -3   48.50    5.70
   3  -5   3   52.29   17.10
   3   5  -3   42.00   18.80
  -3  -5  -3   42.80    6.40
  -3  -5  -3   38.90    4.10
  -3  -5  -3   37.90    6.80
  -3  -5  -3   29.50    8.10
   3  -5   3   33.00    4.10
  -3  -5   3   47.80    7.40
  -3   5  -3   55.99    8.80
  -3  -5   3   49.20    4.40
  -3  -5   3   39.70    6.50
  -3  -5   3   42.00    6.00
   3  -5  -3   58.49   13.00
   3   5   3   48.80    4.80
   3   5   3   42.10   20.80
   4   5  -3  283.77   11.90
  -4  -5  -3  282.77   11.80
  -4  -5  -3  302.07   12.90
   4  -5   3  285.07   13.70
  -4   5   3  274.97   12.90
  -4  -5  -3  245.98   19.60
  -4  -5  -3  338.57   16.30
   4  -5   3  300.47   11.60
  -4  -5  -3  305.27   13.50
   4   5  -3  309.07   14.00
  -4  -5   3  308.67   12.00
   4  -5  -3  283.77   11.80
   4   5   3  297.07   13.50
  -4  -5   3  297.07   12.60
  -4  -5   3  303.77   13.50
  -4   5  -3  301.57   13.00
  -4  -5   3  308.57   15.00
   4   5   3  306.17   13.00
  -4  -5   3  273.87   15.40
   5   5  -3  107.59    8.00
  -5  -5  -3  105.99   11.80
   5   5  -3  102.59    9.60
  -5  -5  -3   99.69    8.00
  -5  -5  -3  131.39   11.70
  -5  -5  -3  108.09    7.20
   5   5  -3  118.69    6.90
  -5  -5  -3  108.29    7.20
   5  -5   3  108.69    8.10
   5  -5   3  126.89    6.70
  -5   5   3  103.79    7.60
  -5  -5   3  113.59    8.30
  -5  -5   3  115.29    7.80
  -5   5  -3  122.09    7.80
  -5  -5   3  110.49   10.50
   5   5   3   97.29    8.10
   5  -5  -3  119.39    6.70
   5   5   3  111.09    9.00
  -5  -5   3  105.19    9.80
   6   5  -3   92.49   11.10
   6  -5   3   94.89    7.40
  -6  -5  -3  114.89   12.20
  -6  -5  -3  107.49    7.00
   6   5  -3   90.49    6.70
   6  -5   3  100.19    5.90
   6  -5  -3   88.49    8.10
  -6  -5   3   92.59    8.40
  -6   5  -3   94.19    7.40
   6  -5  -3   95.99    5.80
  -6  -5   3   86.29   10.80
   6   5   3   83.09   10.10
   7   5  -3    1.30    2.30
   7  -5   3    4.00    2.30
   7  -5   3    3.40    2.20
   7  -5   3    1.70    2.20
  -7  -5  -3    2.10    3.40
   7  -5  -3    5.30    3.20
   7  -5  -3    5.50    2.10
  -7  -5   3    0.30    2.80
   0  -6   3  498.85   21.60
   0  -6   3  511.75   17.50
   0   6  -3  488.65   16.70
   1   6  -3  406.96   26.70
  -1  -6  -3  408.46   14.90
   1  -6   3  397.86   14.60
   1   6  -3  426.46   14.70
  -1  -6   3  396.46   17.50
  -1  -6   3  403.76   14.70
   2   6  -3  954.30   46.70
   2  -6   3  945.21   31.90
  -2  -6  -3  992.00   32.20
   2   6  -3  971.30   32.80
   2  -6  -3  893.41   36.70
  -2  -6   3  992.30   35.10
  -2  -6   3  948.71   32.10
   3   6  -3   43.20   31.30
   3  -6   3   77.89   10.20
   3  -6   3   82.99    5.20
  -3  -6  -3   85.49   11.90
  -3  -6  -3   84.59    5.40
   3   6  -3   90.59    6.70
  -3  -6  -3   97.29    8.50
   3   6  -3   74.29   12.20
  -3  -6  -3   82.09    7.80
  -3  -6   3   77.49    5.50
   3   6   3   96.99   10.40
  -3  -6   3   98.79    6.90
  -3  -6   3   92.19   15.00
   3   6   3   90.19    6.00
  -3   6  -3   75.39    7.30
  -3  -6   3   84.29    7.70
  -4  -6  -3  285.77   13.20
  -4  -6  -3  300.97   12.00
  -4  -6  -3  294.57   12.70
   4   6  -3  278.67   13.60
  -4  -6  -3  308.87   17.50
   4  -6   3  298.17   11.80
  -4  -6   3  298.67   15.60
   4  -6  -3  287.87   11.90
  -4   6  -3  293.37   13.30
  -4  -6   3  300.87   13.80
  -4  -6   3  287.47   13.30
   4   6   3  291.27   12.50
  -4  -6   3  279.87   12.30
  -5  -6  -3    6.20    2.90
  -5  -6  -3    8.00    7.30
   5  -6   3    6.70    4.20
   5   6  -3   11.90    3.90
  -5  -6  -3    5.20    3.50
  -5  -6  -3    7.00    4.80
  -5  -6  -3    0.10    7.40
   5   6  -3   -2.20    4.90
   5   6   3    4.20    4.50
  -5  -6   3    3.50    5.10
  -5  -6   3    9.50    6.20
  -5  -6   3    6.10    3.50
   5   6   3    2.40    4.50
  -5   6  -3    8.40    3.40
   5  -6  -3    3.20    3.60
  -5  -6   3    5.80    3.70
  -6  -6  -3   54.99    5.50
   6  -6   3   57.99    5.80
   6   6  -3   49.99    7.40
   6  -6   3   54.99    4.60
   6   6  -3   57.69    5.40
  -6  -6  -3   38.70    6.40
  -6  -6  -3   46.50    8.70
   6  -6  -3   51.19    4.70
  -6  -6   3   51.69    5.70
  -6   6  -3   59.69    5.40
   6  -6  -3   40.80    8.50
  -6  -6   3   48.20    8.00
  -6  -6   3   53.89    7.60
   7  -6   3   24.80    3.30
  -7  -6  -3   18.50    4.00
   7  -6   3   17.60    2.60
  -7  -6  -3   29.50    4.30
   7  -6   3   19.30    3.00
   7  -6  -3   25.10    3.50
  -7  -6   3   26.30    4.80
   0   7  -3  310.17   15.50
   0  -7   3  301.37   11.30
   0   7  -3  285.07   16.50
   0  -7  -3  268.87   14.20
  -1  -7  -3  321.27   12.30
   1   7  -3  323.97   11.20
   1   7  -3  316.17   15.60
   1  -7   3  323.47   12.10
   1   7   3  317.97   15.50
  -1  -7   3  302.87   17.60
  -1   7  -3  304.37   13.90
  -1  -7   3  319.27   12.20
  -1   7  -3  303.97   15.90
   2   7  -3  513.25   22.00
  -2  -7  -3  483.05   20.60
   2   7  -3  556.74   18.90
  -2  -7  -3  550.04   18.90
   2  -7   3  534.55   18.50
   2  -7   3  504.95   21.40
  -2  -7  -3  531.65   21.20
   2   7   3  525.65   22.10
  -2  -7   3  532.15   18.90
  -2  -7   3  523.45   19.90
  -2  -7   3  538.65   20.60
  -2   7  -3  486.05   22.50
  -2   7  -3  515.85   19.80
  -2  -7   3  546.45   23.30
  -3  -7  -3  152.18    7.70
   3  -7   3  127.09   10.90
   3   7  -3  156.88   12.40
  -3  -7  -3  156.88    9.30
   3   7  -3  160.58    8.70
   3  -7   3  153.38    7.40
  -3  -7  -3  157.78    9.80
  -3  -7  -3  154.58   16.60
  -3  -7   3  170.18    8.70
  -3   7  -3  147.09    9.40
  -3  -7   3  149.09    9.60
   3   7   3  170.58   11.80
  -3  -7   3  166.28   12.80
  -3  -7   3  154.18    7.80
   4  -7   3  456.15   18.50
  -4  -7  -3  444.26   23.60
  -4  -7  -3  462.85   18.50
   4  -7   3  478.15   17.00
  -4  -7  -3  476.95   17.90
  -4  -7  -3  470.85   17.30
   4   7  -3  443.06   18.10
   4   7  -3  453.45   18.30
  -4  -7   3  436.26   21.00
  -4  -7   3  459.95   18.40
  -4  -7   3  451.55   17.50
   4  -7  -3  469.25   17.00
  -4   7  -3  458.05   17.70
  -4  -7   3  465.05   21.70
  -4  -7   3  468.05   17.20
  -5  -7  -3   43.20    6.00
   5   7  -3   43.20    6.00
  -5  -7  -3   39.70   10.00
   5   7  -3   46.30    6.20
   5  -7   3   48.70    6.30
  -5  -7  -3   42.30    5.10
  -5  -7  -3   34.00    5.30
   5  -7   3   34.80    4.30
  -5   7  -3   35.90    5.70
  -5  -7   3   22.00    7.30
   5  -7  -3   39.40    4.90
  -5  -7   3   37.00    5.90
  -5  -7   3   30.60    3.90
  -5  -7   3   29.30    6.20
  -6  -7  -3   65.99   10.40
  -6  -7  -3   60.99    5.30
   6  -7   3   65.69    6.00
   6   7  -3   65.79    7.70
   6  -7   3   61.99    4.50
   6  -7   3   65.49    5.70
   6  -7  -3   56.99    4.50
  -6  -7   3   63.89    5.50
  -6  -7   3   53.39    7.30
   0   8  -3  466.55   18.60
   0  -8   3  462.55   19.50
   0   8   3  503.15   20.70
   0   8  -3  479.05   20.40
   0  -8   3  486.35   17.30
   0  -8  -3  460.15   17.50
  -1   8   3   60.09   10.10
  -1  -8  -3   64.89    5.50
   1  -8   3   69.59    5.00
   1   8  -3   77.79    9.10
   1  -8   3   76.99    8.10
  -1   8  -3   64.59    9.30
  -1  -8   3   79.89    5.20
  -1  -8   3   70.59    8.50
   1   8   3   76.89    9.00
  -1   8  -3   53.99    7.10
  -1  -8   3   71.69    7.70
  -2  -8  -3  146.19    9.90
   2  -8   3  136.99    7.10
  -2  -8  -3  124.49   10.40
  -2  -8  -3  152.38    7.50
   2   8  -3  144.09   11.00
   2  -8   3  156.18   11.00
   2   8   3  133.59   10.80
  -2   8  -3  163.68    8.80
  -2  -8   3  149.39   15.30
  -2   8  -3  137.89   11.40
  -2  -8   3  128.59    9.10
  -2  -8   3  126.99    8.00
  -2  -8   3  143.59    8.70
   3  -8   3   80.09    9.50
  -3  -8  -3   77.49    7.60
   3  -8   3   72.39    5.40
  -3  -8  -3   73.59    7.10
  -3  -8  -3   76.79    5.50
   3   8  -3   70.79    9.40
  -3  -8   3   77.89    6.40
  -3  -8   3   59.09    7.50
  -3  -8   3   68.59    5.50
  -3   8  -3   63.89    6.90
  -3  -8   3   44.40    9.00
   3  -8  -3   73.59    6.10
  -4  -8  -3  192.38    9.20
  -4  -8  -3  158.58   20.50
   4  -8   3  201.48   12.10
  -4  -8  -3  203.48    9.80
   4  -8   3  210.78    9.00
  -4  -8  -3  213.88   10.70
   4  -8   3  205.58   11.00
  -4   8  -3  203.08    9.60
  -4  -8   3  187.08    9.30
  -4  -8   3  186.08   20.30
  -4  -8   3  202.58    9.50
  -4  -8   3  199.68   10.60
   4  -8  -3  197.08    9.10
   5  -8   3   14.00    2.70
  -5  -8  -3   14.70   11.00
  -5  -8  -3   11.10    2.80
  -5  -8  -3   13.00    3.30
  -5  -8  -3   17.00    3.50
   5  -8   3   14.90    4.20
  -5  -8   3   16.90    6.40
  -5  -8   3    5.20    3.20
  -5  -8   3   17.10    8.60
   5  -8  -3   12.10    2.90
  -5  -8   3    9.90    3.20
   6  -8   3   34.70    3.90
   6  -8   3   44.40    6.30
   6  -8   3   36.90    3.90
  -6  -8  -3   40.10    4.10
  -6  -8   3   35.10    5.20
   6  -8  -3   41.40    3.90
  -6  -8   3   37.80    4.10
   0  -9   3   -3.20    7.90
   0  -9   3   -0.80    2.40
   0   9  -3   -5.50    4.50
   0   9   3    1.50    4.80
   0  -9  -3   -0.50    2.80
   1   9  -3   74.39    8.90
   1  -9   3   62.99    5.20
  -1  -9  -3   69.39    8.30
  -1  -9  -3   68.29    5.50
   1  -9   3   65.79    9.50
  -1  -9  -3   76.89   10.30
  -1   9   3   59.49    9.60
   1  -9  -3   58.39    6.00
  -1  -9   3   65.39    5.20
  -1  -9   3   63.99    7.10
  -1   9  -3   56.09    8.90
  -1  -9   3   70.89    8.00
  -1   9  -3   52.09    6.70
   1   9   3   76.99    8.80
   2  -9   3   81.09    5.50
   2  -9   3   68.89    7.30
  -2  -9  -3   81.79    5.90
  -2   9   3   82.39   11.90
  -2  -9  -3   72.99    8.40
   2   9  -3   78.79    9.20
  -2  -9  -3   72.59    7.70
  -2   9  -3   78.59    6.80
  -2  -9   3   70.89    7.60
   2  -9  -3   67.89    6.40
  -2  -9   3   97.79    5.90
  -2   9  -3   83.69    9.90
  -2  -9   3   81.69    7.20
   2   9   3   85.09    9.10
   3  -9   3  186.38   11.50
   3   9  -3  193.48   12.30
  -3  -9  -3  183.18   10.40
  -3  -9  -3  194.58    9.90
  -3  -9  -3  173.28   11.10
   3  -9   3  197.88    9.10
  -3  -9   3  190.98   10.40
  -3  -9   3  190.78   10.80
   3  -9  -3  188.98    9.10
  -3   9  -3  196.38   10.60
  -4  -9  -3   42.70    4.90
  -4  -9  -3   35.20    5.70
   4  -9   3   35.60    4.20
  -4  -9  -3   38.90    5.00
   4  -9   3   37.90    5.60
  -4  -9   3   31.30    4.90
  -4  -9   3   35.60    5.50
  -4  -9   3   40.10    5.30
  -4  -9   3   33.90   12.30
   4  -9  -3   34.70    5.00
  -5  -9  -3   95.59    6.00
  -5  -9  -3   93.89    6.90
   5  -9   3   83.39    7.50
   5  -9   3   93.89    5.40
  -5  -9  -3   97.49    5.40
  -5  -9   3  100.19    6.00
   5  -9  -3   91.79    5.60
  -6  -9  -3   31.00    3.20
  -6  -9   3   31.10    3.50
   0 -10   3   18.10    3.00
   0  10  -3   21.60    5.50
   0 -10   3   20.70    4.10
   0  10   3   22.40    7.10
   0 -10   3   13.50    4.80
   0 -10  -3   17.80    3.20
  -1 -10  -3   69.29    9.50
   1 -10   3   54.99    8.20
  -1  10   3   68.79    9.50
   1 -10   3   68.89    5.80
  -1 -10  -3   61.49    8.20
   1  10  -3   58.29    9.30
  -1 -10  -3   46.30    7.10
  -1 -10   3   69.29    7.40
  -1  10  -3   64.79    8.50
  -1 -10   3   60.19    6.50
  -1 -10   3   52.69    5.20
   1  10   3   67.29    8.30
  -2 -10  -3   62.59    5.60
  -2  10   3   68.19   10.60
   2 -10   3   65.19    8.60
   2  10  -3   66.49    8.60
   2 -10   3   65.69    5.40
  -2 -10  -3   62.59    6.90
  -2 -10  -3   73.69    7.40
   2  10   3   69.79    8.20
  -2 -10   3   76.09    5.50
   2 -10  -3   59.29    6.00
  -2 -10   3   55.69    6.80
  -2  10  -3   70.99    8.70
  -2 -10   3   64.39    6.40
  -3 -10  -3  103.79    9.70
   3 -10   3  126.79    6.70
   3 -10   3  113.29    9.80
  -3 -10  -3  125.09    7.60
  -3 -10  -3  133.39    7.10
   3  10  -3  144.29   10.60
  -3 -10   3  111.99   16.40
   3 -10  -3  118.79    7.10
  -3 -10   3  135.49    7.20
  -3 -10   3  127.49    7.00
  -4 -10  -3   19.00    3.30
  -4 -10  -3   23.10    3.10
   4 -10   3   25.10    3.00
  -4 -10  -3   30.30    4.30
  -4 -10   3   28.20    4.70
  -4 -10   3   29.90    4.10
  -5 -10  -3    4.70    2.10
   5 -10   3   11.40    2.20
  -5 -10  -3    7.10    2.20
  -5 -10   3    6.50    2.10
   5 -10  -3    0.20    2.80
   0  11  -3   49.20    7.40
   0 -11  -3   52.99    8.40
   0 -11   3   45.90    5.90
   0  11   3   48.50    7.50
   0 -11   3   40.80    5.60
   0 -11  -3   42.50    4.90
   0 -11   3   43.50    4.70
   1  11  -3  147.29   10.10
   1 -11   3  134.49    7.30
  -1 -11  -3  150.58   10.20
   1 -11   3  149.09    9.30
  -1 -11  -3  146.79    7.30
   1 -11  -3  134.89    7.40
   1  11   3  143.39    9.90
  -1 -11   3  128.39    7.20
  -1 -11   3  145.09   10.90
  -1  11  -3  141.09    9.80
  -1 -11   3  135.99    8.00
  -2 -11  -3   68.39    5.90
   2  11  -3   58.39    7.40
   2 -11   3   66.39    5.10
  -2 -11  -3   74.49    6.90
   2 -11   3   61.49    8.10
  -2 -11  -3   72.29    5.20
  -2  11  -3   73.69    8.20
   2 -11  -3   64.29    5.80
  -2 -11   3   66.49    5.30
  -2 -11   3   65.39    5.40
  -2 -11   3   78.39    6.60
  -3 -11  -3  227.58    9.80
  -3 -11  -3  208.08    9.00
  -3 -11  -3  217.28    9.30
   3 -11   3  206.38    8.90
  -3 -11   3  221.48    9.80
   3 -11  -3  213.98    9.80
  -3 -11   3  211.78    9.10
  -3 -11   3  222.88    9.20
  -4 -11  -3   18.30    3.10
  -4 -11  -3   17.90    3.10
  -4 -11  -3   16.00    2.60
   4 -11  -3   22.70    3.30
   0  12  -3   36.50    6.00
   0 -12   3   40.10    4.20
   0 -12  -3   34.60    4.40
   0 -12   3   39.30    6.10
   0 -12  -3   41.40    6.10
   0 -12   3   42.50    4.80
   1 -12   3   49.99    4.40
   1  12  -3   51.79    6.10
  -1 -12  -3   61.19    5.40
  -1 -12  -3   53.69    4.80
   1 -12   3   58.59    7.30
   1 -12   3   53.79    5.00
  -1 -12   3   62.09    5.70
  -1 -12   3   54.29    4.90
   1 -12  -3   50.59    6.30
  -1 -12   3   46.20    4.30
  -1  12  -3   50.29    6.40
   2 -12   3    4.80    2.30
  -2 -12  -3    7.40    3.20
   2 -12   3   12.60    2.70
  -2 -12  -3   10.20    2.40
  -2 -12  -3    8.40    3.50
  -2  12  -3   17.70    4.70
  -2 -12   3   11.20    2.80
  -2 -12   3   13.00    3.60
  -2 -12   3   10.40    2.20
   2 -12  -3   11.00    2.90
   2 -12  -3    3.00    3.80
  -3 -12  -3    6.70    2.60
  -3 -12  -3   10.90    2.10
   3 -12   3    6.40    2.20
   3 -12   3    8.30    2.30
  -3 -12  -3    8.10    2.30
  -3 -12   3    9.20    1.90
  -3 -12   3    8.90    2.20
  -4 -12   3   10.10    1.90
   0 -13  -3    3.90    2.40
   0  13  -3    0.40    2.60
   0 -13   3    5.60    2.20
   0 -13  -3    3.70    2.40
   0 -13   3    6.30    3.60
   0 -13   3    4.20    1.90
  -1 -13  -3   70.59    4.40
   1 -13   3   61.59    4.20
  -1 -13  -3   64.49    4.40
   1 -13   3   62.99    4.30
  -1 -13   3   64.29    4.40
  -1 -13   3   65.29    3.90
  -1 -13   3   64.69    5.00
   1 -13  -3   64.19    5.80
  -2 -13  -3   43.60    3.30
   2 -13   3   38.40    4.00
  -2 -13   3   44.20    3.10
  -2 -13   3   39.80    3.90
   0   0   4  695.43   23.20
   0   0   4  688.23   23.10
   0   0  -4  645.04   23.00
  -1   0  -4  100.99    6.60
   1   0   4  105.79    6.40
   1   0  -4  101.69    5.70
  -1   0   4   98.79    6.10
   1   0   4   96.89    7.90
  -1   0   4   96.79    3.90
   2   0  -4  564.94   22.80
  -2   0   4  572.94   24.30
  -2   0   4  578.74   19.30
   2   0   4  587.54   25.60
  -2   0  -4  586.74   20.00
   2   0   4  578.14   20.20
   2   0   4  567.64   23.80
  -2   0  -4  580.34   24.20
   2   0  -4  586.54   24.30
   3   0  -4  270.47   24.70
   3   0   4  240.08   10.90
  -3   0  -4  255.07   10.60
   3   0  -4  255.87   17.40
   3   0   4  258.77   29.00
  -3   0   4  254.87    9.60
  -3   0  -4  246.28   19.00
   3   0  -4  248.58   12.40
   3   0   4  248.98   17.50
   4   0   4  303.37   28.20
   4   0   4  282.47   10.90
   4   0  -4  292.67   27.60
   4   0  -4  262.37   15.80
   4   0  -4  284.77   11.10
   4   0   4  290.07   13.90
  -4   0  -4  299.57   12.60
  -4   0   4  290.07   11.00
  -5   0   4  389.16   16.30
   5   0  -4  386.16   15.60
   5   0   4  399.76   14.70
   5   0   4  419.16   19.10
  -5   0  -4  387.66   16.30
  -5   0  -4  407.06   16.60
   5   0  -4  398.36   14.80
   5   0   4  364.06   15.80
   5   0  -4  430.56   28.90
  -5   0  -4  372.16   16.50
   5   0  -4  388.06   16.20
  -6   0  -4   18.60    4.50
  -6   0   4   16.00    4.30
  -6   0  -4    6.60    4.60
   6   0  -4   18.10    4.30
   6   0   4   11.70    3.10
   6   0  -4   19.00    3.00
   6   0   4   11.50    8.00
   6   0  -4   16.40    3.40
   6   0  -4   23.60   11.70
   6   0   4   11.20    4.00
   7   0   4   52.29   13.80
  -7   0  -4   54.39    6.20
   7   0  -4   57.49    5.40
   7   0  -4   48.90    4.70
   7   0   4   54.99    5.30
  -7   0   4   57.59    5.70
   8   0  -4    9.80    1.90
  -8   0  -4    9.30    2.50
   8   0   4   11.30    2.10
   0  -1  -4 1078.59   33.60
   0   1  -4 1075.39   35.20
   0  -1   4 1009.50   35.00
   0  -1   4  983.00   35.10
   0   1   4  984.60   33.30
   1  -1   4 2009.20   68.39
  -1  -1  -4 2008.50   67.89
  -1   1   4 2064.89   66.09
   1   1  -4 2092.49   67.99
   1  -1   4 2035.80   65.89
  -1  -1  -4 2008.20   67.89
   1   1   4 2000.40   65.59
  -1  -1   4 2009.40   65.59
  -1  -1   4 1970.50   68.09
   1   1   4 2125.09   67.99
   1  -1  -4 2098.59   66.39
  -1   1  -4 1963.70   65.69
  -1   1  -4 2168.08   68.49
   1   1   4 2098.29   68.09
  -2   1   4 2307.37   79.09
   2   1  -4 2436.66   80.69
   2  -1   4 2335.37   80.59
   2  -1   4 2371.96   76.99
   2   1  -4 2336.47   76.99
   2   1  -4 2288.77   81.49
  -2  -1  -4 2319.17   81.49
  -2  -1  -4 2407.46   81.39
   2  -1   4 2471.35   82.09
  -2  -1  -4 2306.47   76.79
  -2  -1   4 2337.67   76.49
   2   1   4 2306.97   76.69
   2   1   4 2267.97   81.59
  -2  -1   4 2359.46   81.49
   2  -1  -4 2349.36   79.59
  -2   1  -4 2382.56   76.59
  -2   1  -4 2649.83   81.79
   2  -1  -4 2526.15   79.19
   2   1   4 2388.36   80.89
   3  -1   4  411.66   16.30
   3   1  -4  428.96   32.60
   3   1  -4  387.36   16.30
   3  -1   4  427.86   23.70
  -3  -1  -4  420.56   15.70
   3   1  -4  441.16   22.10
  -3  -1  -4  399.56   24.00
  -3   1   4  377.56   13.50
   3  -1   4  409.46   32.60
  -3   1  -4  411.36   15.30
  -3   1  -4  420.46   24.90
   3  -1  -4  418.26   21.30
  -3  -1   4  437.76   15.20
   3   1   4  398.76   15.80
   3   1   4  392.96   22.50
   3  -1  -4  402.76   26.10
   4  -1   4  102.69    5.40
   4   1  -4  111.09   20.00
  -4  -1  -4   93.99    6.40
  -4  -1  -4   99.69    7.30
   4   1  -4  100.79    5.50
   4   1  -4  103.79    9.50
   4  -1   4   96.59    9.00
  -4  -1  -4   83.79   21.10
   4  -1   4  103.69   18.30
  -4  -1   4  103.89    6.30
   4  -1  -4   95.09   16.50
   4   1   4   68.09   17.40
   4   1   4  105.79    5.60
   4   1   4  110.79    8.10
   4  -1  -4   95.49    5.70
  -4   1  -4  110.49    6.80
  -5  -1  -4  240.38   12.00
  -5  -1  -4  252.87   12.60
   5   1  -4  254.17   15.90
  -5  -1  -4  252.07   13.20
   5  -1   4  253.17   10.20
   5  -1   4  239.28   11.70
  -5   1   4  251.87   11.80
   5   1  -4  238.78   11.10
   5   1  -4  252.07   10.30
   5  -1   4  254.57   15.60
   5  -1  -4  229.28   11.70
  -5  -1   4  251.07   12.40
  -5   1  -4  248.78   11.40
   5   1   4  251.87   10.20
  -5  -1   4  263.47   10.90
  -5   1  -4  245.18   12.60
   5   1   4  245.38   13.70
   5   1   4  241.48   11.60
   5  -1  -4  254.17   12.30
  -5   1  -4  247.88   13.10
   5  -1  -4  248.08   10.40
  -6  -1  -4  549.45   22.60
  -6   1   4  562.64   21.70
   6   1  -4  580.94   20.60
   6   1  -4  579.74   21.00
   6  -1   4  577.14   22.10
  -6  -1  -4  574.54   22.70
   6  -1   4  588.14   20.50
  -6  -1  -4  570.34   22.50
   6   1  -4  585.14   21.70
   6  -1   4  522.75   26.90
   6   1  -4  568.44   28.20
   6  -1  -4  599.74   21.80
  -6   1  -4  568.04   22.30
  -6  -1   4  587.64   22.30
   6  -1  -4  587.94   21.40
   6   1   4  575.84   20.40
   6   1   4  574.94   21.60
   6  -1  -4  581.74   20.60
   6   1   4  542.95   24.90
   7  -1   4   38.00    4.90
  -7  -1  -4   33.70    4.60
   7  -1   4   28.70    3.70
   7   1  -4   38.90    4.90
  -7   1   4   30.60    4.90
   7   1  -4   36.20    5.00
  -7  -1   4   34.10    5.40
   7   1   4   17.90   10.90
   7   1   4   40.10    4.80
   7  -1  -4   35.50    4.90
   7  -1  -4   29.40    4.00
  -7   1  -4   40.70    5.60
   8  -1   4    8.80    2.80
  -8  -1  -4    9.90    2.40
   8  -1   4   11.80    2.10
   8   1  -4   12.40    2.10
   8   1   4    7.80    2.10
  -8  -1   4   12.30    2.20
   8  -1  -4   11.70    2.20
  -8   1  -4    7.40    2.10
   0  -2   4  199.28   10.70
   0  -2  -4  194.38    7.70
   0  -2  -4  198.08    7.70
   0  -2   4  197.78   10.30
   0  -2   4  186.18    7.70
   0   2  -4  199.18   10.00
   0   2   4  195.88    7.40
   0   2  -4  197.28    9.60
   0   2   4  196.58    6.70
   0   2   4  218.38    7.30
   0   2  -4  191.08    7.50
  -1  -2  -4  489.25   20.20
   1   2  -4  508.05   17.70
   1  -2   4  490.25   17.90
   1  -2   4  504.15   21.00
   1   2  -4  528.95   20.60
   1  -2   4  523.35   21.20
  -1  -2  -4  501.15   20.00
   1   2   4  513.95   17.10
   1  -2  -4  549.85   17.10
  -1  -2   4  504.75   21.70
  -1  -2   4  496.85   17.70
   1   2   4  490.85   20.20
  -1   2  -4  550.34   20.90
   1   2   4  527.45   20.10
   1  -2  -4  537.75   17.40
  -1   2  -4  487.95   17.30
   2   2  -4   23.90    4.00
  -2  -2  -4   10.20    8.90
   2  -2   4   15.70    3.40
   2  -2   4   14.20    5.40
  -2  -2  -4   15.40    3.10
  -2  -2  -4   26.40    6.20
   2  -2   4   12.80    7.60
   2   2  -4   14.30    8.90
   2   2  -4   17.10    5.60
   2  -2  -4   22.40    4.80
  -2   2  -4   18.60    2.70
   2  -2  -4   19.20    4.10
  -2  -2   4   19.90    9.50
   2   2   4   13.50    2.20
   2   2   4   21.00    6.90
   2   2   4   10.20    9.20
  -2   2  -4   19.20    6.10
   3  -2   4 1986.80   63.99
   3   2  -4 1874.21   81.69
  -3  -2  -4 1922.41   65.39
   3   2  -4 1974.20   64.09
  -3  -2  -4 2022.50   64.09
  -3  -2  -4 1959.20   73.69
   3  -2   4 1925.71   77.99
   3   2  -4 1984.40   65.59
  -3  -2   4 2040.90   65.19
   3   2   4 2072.69   65.39
  -3   2  -4 2051.59   64.69
   3  -2  -4 1887.61   71.59
  -3   2  -4 2014.60   73.59
   3   2   4 1911.91   72.49
   3  -2  -4 2084.89   69.89
   4   2  -4   36.90    4.90
   4   2  -4   31.10    3.80
   4   2  -4   37.70    6.00
   4  -2   4   24.80   17.90
  -4  -2  -4   30.20    4.90
  -4  -2  -4   33.00    5.00
   4  -2   4   29.60    6.40
  -4  -2  -4   21.30   22.80
   4   2  -4   38.50   18.00
   4  -2   4   36.10    3.70
  -4  -2  -4   34.80    4.60
  -4  -2  -4   40.20    6.20
  -4   2  -4   43.00    4.70
   4   2   4   38.10    4.60
   4   2   4   42.80    6.20
   4  -2  -4   29.00   15.60
   4   2   4   53.39    6.20
  -4   2  -4   24.20    5.20
  -4  -2   4   33.00    5.40
  -4  -2   4   41.40    5.30
   4  -2  -4   37.40    4.40
   4   2   4   47.60   19.00
   5   2  -4   27.40    4.00
  -5   2   4   35.40    4.70
   5   2  -4   34.30    4.30
   5  -2   4   36.60    8.30
  -5  -2  -4   37.90    5.90
  -5  -2  -4   44.00    6.30
   5  -2   4   36.70    4.10
  -5  -2  -4   35.30    5.00
   5   2  -4   24.50    6.80
   5  -2   4   40.20    6.20
  -5  -2  -4   34.60    5.50
  -5   2  -4   41.40    6.60
  -5   2  -4   30.70    5.10
   5  -2  -4   36.40    5.40
  -5  -2   4   26.70    4.40
   5  -2  -4   33.10    4.30
   5   2   4   37.30    4.90
   5   2   4   32.20    4.80
  -5  -2   4   41.30    6.90
  -5  -2   4   32.40    5.80
   5   2   4   49.70    7.90
   5  -2  -4   36.50    5.80
   6  -2   4  124.79    8.00
  -6   2   4  120.79    7.90
  -6  -2  -4  126.49    9.50
   6   2  -4  126.79    7.60
  -6  -2  -4  127.59    8.20
  -6  -2  -4  137.69   10.70
   6   2  -4  109.89   14.40
   6   2  -4  130.29    8.20
   6  -2   4  101.89   13.40
   6  -2  -4  136.39    7.90
   6  -2  -4  135.79    8.80
  -6   2  -4  113.89    8.50
  -6  -2   4  127.09    9.00
   6   2   4  135.39   12.00
   6   2   4  115.29    8.00
  -7  -2  -4   65.39    6.60
  -7   2   4   52.19    5.20
   7  -2   4   52.29    5.00
   7  -2   4   51.69    5.20
   7   2  -4   56.19    5.10
   7  -2  -4   49.10    4.20
   7  -2  -4   58.79    5.40
  -7   2  -4   62.79    5.80
  -7  -2   4   51.69    5.80
   7   2   4   47.00    5.30
  -8  -2  -4   17.30    2.50
   8  -2   4   21.80    3.40
   8  -2   4   21.30    3.00
   8   2  -4   24.40    3.00
  -8  -2   4   20.80    3.20
   8  -2  -4   22.80    3.20
   8   2   4   24.70    3.80
   0   3   4 1041.00   32.70
   0  -3   4  974.50   33.70
   0   3  -4 1008.40   36.80
   0  -3  -4 1025.30   34.10
   0   3  -4 1008.30   33.20
   0   3  -4 1035.10   36.60
   0  -3   4 1006.30   37.20
   0   3   4  985.30   33.60
  -1  -3  -4  261.67   14.60
   1   3  -4  285.17   10.70
   1   3  -4  306.37   15.60
   1  -3   4  288.87   15.60
  -1  -3  -4  283.47   13.90
   1  -3   4  247.78   15.30
   1  -3   4  276.87   11.40
   1   3  -4  290.57   15.00
  -1   3  -4  303.47   14.90
  -1  -3   4  267.07   17.40
   1   3   4  251.27   14.80
  -1  -3   4  263.47   10.90
   1  -3  -4  278.17    9.70
   1  -3  -4  294.87   10.60
   1  -3  -4  294.77    9.90
  -1   3  -4  289.37   10.20
   1   3   4  294.47   13.80
   1   3   4  287.67    9.60
  -2  -3  -4  329.67   13.70
   2   3  -4  304.57   26.40
  -2  -3  -4  338.17   19.00
   2   3  -4  327.67   13.10
  -2  -3  -4  298.87   22.10
   2  -3   4  365.06   21.60
   2  -3   4  326.47   14.30
   2   3  -4  334.57   18.70
  -2   3  -4  345.87   12.30
   2  -3  -4  355.46   15.60
   2  -3  -4  367.56   14.70
  -2   3  -4  357.46   19.60
   2   3   4  356.36   12.60
  -2  -3   4  332.37   13.20
   2   3   4  355.66   19.10
   3  -3   4   21.70    5.70
  -3  -3  -4    7.60   11.60
  -3  -3  -4   27.20    4.50
   3   3  -4   17.40    3.80
   3   3  -4    8.40   11.00
   3   3  -4   25.50    3.60
  -3  -3  -4   18.20    2.70
   3  -3   4   21.10    2.80
   3  -3   4    7.30    9.50
   3   3   4   16.40    3.00
   3  -3  -4   15.10    7.80
  -3   3  -4   19.20    3.20
  -3  -3   4   17.90    3.40
  -3  -3   4   23.60    3.70
   3   3   4   13.60   10.70
   3  -3  -4   23.00   11.80
  -3   3  -4    9.50   14.50
   4   3  -4   87.99    8.50
   4  -3   4   72.69    5.10
  -4  -3  -4   72.29    6.60
  -4  -3  -4   76.29    7.70
   4  -3   4   90.49   12.60
  -4  -3  -4   74.19    5.40
   4  -3   4   72.69   22.20
   4  -3   4   73.09    7.90
  -4  -3  -4   69.49    7.80
   4   3  -4   84.69    6.70
  -4   3   4   84.99    8.10
   4   3  -4   48.60   24.00
  -4   3  -4   76.59    5.10
  -4  -3   4   81.29    8.20
   4   3   4   73.79    6.80
   4  -3  -4   69.79    5.70
   4   3   4   95.89   23.90
  -4   3  -4   82.29    7.00
   4   3   4   73.19    7.50
  -4  -3   4   73.29    8.50
   4  -3  -4   93.49   18.80
  -4  -3   4   67.79    7.30
   5   3  -4  175.38    8.10
   5  -3   4  177.58   17.30
   5   3  -4  186.38   12.50
   5   3  -4  176.58    8.70
  -5  -3  -4  175.68    8.90
  -5  -3  -4  184.68   12.00
  -5  -3  -4  180.68    9.70
   5  -3   4  176.08    8.00
   5  -3   4  155.48   13.80
   5  -3  -4  170.48   10.60
   5  -3  -4  178.88    8.20
   5   3   4  160.78   10.90
  -5  -3   4  167.18   12.00
  -5  -3   4  182.38   10.30
   5  -3  -4  172.38   11.50
  -5  -3   4  159.48   10.70
   5   3   4  170.38   11.70
  -5   3  -4  158.98    9.60
  -6  -3  -4  291.67   12.40
   6   3  -4  268.97   11.20
   6   3  -4  277.07   12.30
  -6   3   4  270.47   11.90
  -6  -3  -4  276.07   14.20
   6   3  -4  271.47   11.30
   6  -3   4  281.17   11.40
   6  -3   4  269.97   12.30
  -6  -3  -4  275.47   21.90
   6  -3   4  248.48   25.70
   6  -3  -4  272.67   12.00
   6  -3  -4  289.17   11.30
  -6  -3   4  283.67   13.50
   6   3   4  255.17   12.10
   6  -3  -4  272.77   12.60
  -6   3  -4  282.27   12.70
  -6  -3   4  258.07   12.50
  -7  -3  -4   75.99    6.80
   7   3  -4   78.79    5.60
   7  -3   4   85.49    5.70
   7  -3   4   71.49    5.30
  -7  -3  -4   77.59    7.30
   7  -3  -4   72.59    4.80
  -7  -3   4   77.29    6.40
   7   3   4   82.89    5.90
   7  -3  -4   84.49    6.10
  -7   3  -4   86.29    6.30
   8   3  -4   27.80    2.90
   8  -3   4   28.50    3.30
  -8  -3  -4   26.20    3.90
   8  -3   4   22.60    2.90
  -8  -3   4   25.90    3.30
   0   4   4  126.99    6.30
   0   4  -4  122.79   11.40
   0   4   4  117.49    6.50
   0   4  -4  119.69   10.30
   0   4  -4  121.49    5.40
   0   4   4  106.09    7.20
   0  -4   4  107.29   14.80
   0  -4   4  117.69    7.30
   0  -4  -4  120.99    8.40
   1   4  -4  663.93   28.30
   1   4  -4  639.54   21.90
   1  -4   4  639.74   23.30
   1  -4   4  641.04   29.10
  -1  -4  -4  651.53   27.70
   1  -4   4  603.24   29.10
   1   4  -4  656.63   27.30
  -1   4  -4  608.44   27.10
   1   4   4  630.14   25.60
  -1  -4   4  617.44   22.60
  -1  -4   4  630.54   32.20
  -1   4  -4  633.24   21.40
   1  -4  -4  657.93   21.80
   2   4  -4  215.28    9.30
   2   4  -4  200.58   16.40
   2  -4   4  175.28   25.00
  -2  -4  -4  210.68   29.20
   2  -4   4  194.98   12.10
  -2  -4  -4  186.38   10.90
   2  -4   4  224.58   22.50
   2   4   4  213.68    8.30
  -2   4  -4  205.38    8.00
  -2  -4   4  196.98    9.60
   2  -4  -4  215.88   12.50
  -2   4  -4  208.38   18.90
   2  -4  -4  206.68   10.80
   2   4   4  207.48   17.30
   2  -4  -4  228.78   12.10
  -2  -4   4  213.48    8.50
   3   4  -4  581.04   21.80
   3   4  -4  576.14   20.10
  -3  -4  -4  572.24   22.60
   3  -4   4  599.84   32.90
   3  -4   4  558.64   24.30
   3  -4   4  580.34   20.10
   3   4  -4  568.04   34.00
  -3  -4  -4  587.94   20.30
  -3   4  -4  589.74   19.50
  -3  -4   4  593.14   22.10
   3   4   4  551.54   38.00
   3   4   4  602.04   21.10
  -3  -4   4  591.54   20.30
  -4  -4  -4  132.79   15.00
  -4   4   4  106.89    9.20
  -4  -4  -4  132.79    8.70
   4  -4   4  141.09    6.70
  -4  -4  -4  127.29    8.00
   4  -4   4  110.79    9.40
   4   4  -4  129.59    7.80
   4   4  -4  140.39    6.90
  -4  -4  -4  133.19    6.90
   4   4  -4  141.19    9.40
  -4   4  -4  137.49    8.80
  -4  -4   4  124.29    7.90
   4   4   4  151.98    9.10
  -4  -4   4  144.19    9.20
  -4  -4   4  140.79    8.40
   4   4   4  150.98    8.50
  -4  -4   4  131.09    9.00
   4  -4  -4  145.49   24.70
  -4  -4   4  135.19   10.00
   4  -4  -4  166.68   10.30
   4   4   4  138.79   34.40
   5   4  -4    7.90    5.20
  -5   4   4   10.80    4.00
  -5  -4  -4   10.70    3.20
  -5  -4  -4   15.00    4.00
   5   4  -4   11.80    2.80
  -5  -4  -4   11.60    3.30
  -5  -4  -4    9.90    6.10
   5   4  -4    7.30    3.10
   5  -4   4   18.40    4.00
   5  -4   4   14.20    3.00
  -5  -4  -4   15.30    6.00
   5   4   4   17.10    4.60
  -5  -4   4   13.80    4.70
  -5   4  -4   13.60    3.90
   5  -4  -4   24.00    5.50
   5  -4  -4    7.10    5.80
  -5  -4   4   10.30    4.60
  -5  -4   4   16.60    4.60
   6   4  -4   39.50    7.30
  -6  -4  -4   42.20    7.40
   6  -4   4   45.20    4.70
  -6  -4  -4   58.49    8.50
   6  -4   4   41.60    5.80
  -6   4   4   42.60    5.70
   6   4  -4   47.50    5.50
  -6  -4   4   48.00    7.20
   6   4   4   36.20    6.30
  -6  -4   4   45.80    6.50
   6  -4  -4   45.70    4.90
   6   4   4   41.00    6.00
   6  -4  -4   44.40    5.40
  -6   4  -4   48.70    6.10
  -6  -4   4   44.60    6.90
  -7  -4  -4    1.90    3.30
   7  -4   4    3.90    2.40
   7   4  -4   -0.90    2.20
  -7  -4  -4    2.30    3.40
   7  -4  -4    4.60    2.10
   7  -4  -4    1.00    3.00
   7   4   4    8.70    2.90
  -7  -4   4    4.40    3.00
  -7   4  -4    4.00    2.50
   0  -5   4  270.97   25.90
   0  -5   4  281.97   13.10
   0  -5  -4  309.37   16.80
   0   5  -4  301.47   19.70
   0   5  -4  290.47   10.60
   0   5   4  260.07    9.90
   0   5  -4  297.87   18.20
  -1  -5  -4  989.20   42.80
   1  -5   4 1027.00   44.90
   1   5  -4 1018.90   33.50
   1   5  -4 1030.10   42.10
   1  -5   4  985.40   46.00
   1  -5   4 1021.30   35.70
   1   5  -4 1022.80   40.70
  -1  -5   4  988.90   34.70
   1   5   4  937.41   39.30
  -1   5  -4  992.70   41.10
   1   5   4  817.42   46.20
  -1   5  -4 1017.80   32.60
  -1  -5   4 1022.90   33.00
   1  -5  -4 1071.29   62.79
   2   5  -4  767.02   39.80
   2  -5   4  752.22   25.90
   2   5  -4  803.62   27.10
  -2  -5  -4  766.42   26.40
  -2  -5  -4  756.12   29.50
   2   5  -4  770.72   37.00
   2  -5  -4  767.42   27.30
   2   5   4  785.32   25.60
  -2  -5   4  778.42   26.10
  -2  -5   4  767.02   28.20
   2  -5  -4  789.32   30.80
   2   5   4  767.42   36.50
  -3  -5  -4  137.99   11.30
   3   5  -4  119.89   23.70
  -3  -5  -4  110.29    9.20
   3  -5   4  121.79    6.20
   3  -5   4  129.19   20.00
  -3  -5  -4  116.49    6.30
   3   5  -4  132.89    8.10
  -3  -5  -4  116.39    9.20
  -3  -5   4  133.09    9.10
  -3  -5   4  124.59    6.40
  -3   5  -4  121.09    8.30
  -3  -5   4  135.39    9.10
   3   5   4  137.59    6.90
   3   5   4   63.39   23.40
  -3  -5   4  115.39    8.00
  -4  -5  -4  423.76   17.00
   4  -5   4  423.66   17.70
   4   5  -4  426.26   18.40
  -4  -5  -4  435.56   16.30
  -4  -5  -4  450.95   17.80
   4  -5   4  450.25   16.20
  -4  -5  -4  446.06   20.10
   4   5  -4  446.26   16.40
   4  -5  -4  442.16   16.20
  -4  -5   4  414.66   19.30
  -4  -5   4  446.36   19.00
  -4  -5   4  447.66   16.90
  -4   5  -4  448.76   17.40
   4   5   4  450.55   17.30
  -4  -5   4  439.16   16.30
  -4  -5   4  436.36   17.70
   4   5   4  423.16   17.70
   5  -5   4  165.58    7.70
  -5  -5  -4  137.99   12.70
  -5  -5  -4  164.18    8.10
  -5  -5  -4  145.69    9.10
   5   5  -4  142.29   10.90
   5  -5   4  141.29    9.00
   5   5  -4  148.69    7.60
  -5  -5  -4  156.28   13.30
  -5  -5  -4  150.18    8.40
  -5  -5   4  158.18    9.40
   5   5   4  148.09    9.80
  -5  -5   4  138.09   10.10
  -5   5  -4  155.28    8.90
  -5  -5   4  151.68   11.20
   5  -5  -4  151.98    7.60
   5   5   4  146.59    9.20
   5  -5  -4  151.38   11.30
   6   5  -4   10.00    3.20
   6   5  -4    7.60    6.20
   6  -5   4   13.80    4.30
   6  -5   4   12.70    2.80
  -6  -5  -4   12.30    6.40
  -6  -5  -4   10.30    7.40
  -6  -5  -4   10.90    3.50
  -6  -5   4   14.80    4.60
   6  -5  -4   10.00    2.70
  -6  -5   4   14.30    6.50
   6  -5  -4    8.90    4.70
   6   5   4    8.40    4.20
  -6   5  -4   12.40    3.80
   6   5   4   13.00    5.70
  -6  -5   4   12.60    6.20
   7   5  -4    7.70    2.40
   7  -5   4    6.00    2.40
   7  -5   4    6.00    2.40
   7  -5   4    9.90    2.40
  -7  -5  -4   10.80    4.10
  -7  -5  -4   11.90    3.90
   7  -5  -4    8.50    2.20
  -7  -5   4    8.10    2.90
   7  -5  -4   11.80    3.60
   0  -6   4  239.48    9.40
   0   6  -4  234.08    8.90
   1   6  -4   73.39    4.90
  -1  -6  -4   77.49    5.90
   1   6  -4   90.19   15.80
   1  -6   4   75.79    5.00
  -1  -6   4   77.99    4.80
  -1  -6   4   71.99    8.50
  -2  -6  -4   98.09    5.70
   2   6  -4   83.99   19.10
   2  -6   4   91.39    5.50
   2   6  -4  100.39    6.30
  -2  -6   4  101.09    5.60
  -2  -6   4   97.79    9.10
   3  -6   4   52.79    4.50
  -3  -6  -4   49.10    9.00
   3   6  -4   48.40    5.90
   3   6  -4   68.19   11.80
  -3  -6  -4   63.79    4.80
   3   6  -4   15.20   32.60
  -3  -6  -4   67.69    7.70
  -3  -6  -4   52.09    7.60
   3  -6   4   56.89    6.70
  -3  -6   4   59.89    6.20
  -3  -6   4   61.89    7.00
  -3   6  -4   64.39    6.60
   3   6   4   50.69    4.90
  -3  -6   4   64.49   10.20
  -3  -6   4   62.59    4.90
  -3  -6   4   69.59    8.60
  -4  -6  -4  324.27   14.10
   4   6  -4  315.37   14.70
  -4  -6  -4  338.47   12.90
  -4  -6  -4  318.17   18.40
   4  -6   4  281.17   18.90
  -4  -6  -4  318.07   13.60
   4  -6   4  328.07   12.60
   4   6   4  316.77   13.00
  -4   6  -4  324.27   13.80
  -4  -6   4  328.27   14.20
  -4  -6   4  319.17   13.30
  -4  -6   4  315.07   16.30
   4  -6  -4  324.87   12.90
  -4  -6   4  317.37   12.80
  -5  -6  -4   64.19    6.60
  -5  -6  -4   46.60    5.70
  -5  -6  -4   48.30    5.60
   5  -6   4   50.79    6.40
  -5  -6  -4   43.10    9.50
   5  -6   4   55.79    6.50
   5   6  -4   34.90    6.10
   5   6  -4   47.30    6.30
  -5  -6  -4   40.30    8.40
   5  -6  -4   52.99    5.00
  -5  -6   4   44.10    7.50
  -5  -6   4   60.49    7.70
  -5  -6   4   57.59    6.50
  -5   6  -4   53.79    6.10
  -5  -6   4   39.80    6.30
  -6  -6  -4   39.30    5.30
  -6  -6  -4   40.00    6.80
   6  -6   4   47.40    5.40
   6   6  -4   55.29    9.30
   6   6  -4   32.60    5.30
  -6  -6  -4   41.00    8.80
   6  -6   4   38.50    4.20
  -6  -6   4   44.30    7.00
   6  -6  -4   43.20    4.30
  -6  -6   4   34.80    5.60
  -6   6  -4   45.60    5.30
  -7  -6  -4   -2.50    2.60
   7  -6   4   -0.40    2.20
  -7  -6  -4   -1.50    4.00
   7  -6   4    1.20    2.40
   7  -6   4    6.70    4.60
  -7  -6   4    2.40    3.40
   7  -6  -4    2.10    2.00
   0   7  -4    1.90    5.20
   0  -7   4    6.30    2.40
   0   7   4    2.10    5.70
   0   7  -4    8.00    4.40
   1   7  -4 1000.50   36.30
   1  -7   4 1003.00   33.30
   1   7  -4 1033.10   33.00
  -1  -7  -4  991.90   33.40
   1   7   4  968.70   36.20
  -1   7  -4  987.60   34.50
  -1  -7   4  992.10   37.20
  -1   7  -4 1008.10   36.60
  -1  -7   4  957.90   34.90
  -2  -7  -4  558.04   23.40
   2  -7   4  579.54   23.50
   2   7  -4  589.84   24.50
   2   7  -4  621.94   21.70
  -2  -7  -4  617.34   21.40
   2  -7   4  614.64   21.10
  -2  -7  -4  587.74   23.70
  -2  -7   4  589.54   22.90
  -2   7  -4  619.84   22.60
  -2  -7   4  638.04   25.70
  -2  -7   4  616.04   22.40
   2   7   4  617.84   24.50
  -2  -7   4  626.34   21.50
  -2   7  -4  605.94   24.90
  -3  -7  -4   30.80    4.20
  -3  -7  -4   28.20   11.30
  -3  -7  -4   26.10    4.70
   3  -7   4   26.20    3.30
   3   7  -4   30.50    6.60
   3   7  -4   20.80    3.90
   3  -7   4   29.40    5.80
   3  -7   4   28.50    6.50
  -3  -7  -4   20.30    4.20
  -3  -7   4   20.60    3.50
  -3  -7   4   31.50    4.40
  -3  -7   4   27.10    6.90
  -3  -7   4   21.70    4.80
  -3   7  -4   24.40    4.60
  -4  -7  -4  112.69    8.30
   4  -7   4  122.69    8.80
  -4  -7  -4  125.79    7.70
  -4  -7  -4  131.29   16.90
   4   7  -4  118.19    8.90
   4  -7   4  115.29    6.50
  -4  -7  -4  119.69    6.90
  -4  -7   4  143.29   12.40
  -4  -7   4  112.59   12.00
  -4  -7   4  123.29    7.30
  -4  -7   4  108.49    7.50
  -4  -7   4  113.09    8.20
  -4   7  -4  109.69    7.90
   4  -7  -4  110.99    6.90
   5  -7   4  133.99    8.30
  -5  -7  -4  140.99    8.40
   5   7  -4  134.49    8.10
  -5  -7  -4  133.19    7.40
   5   7  -4  130.09   10.50
   5  -7   4  135.99    7.00
  -5  -7  -4  131.39    7.40
   5  -7   4  143.19    8.90
  -5  -7  -4  128.39   16.50
   5  -7  -4  135.09    7.30
  -5  -7   4  132.89   10.50
  -5  -7   4  140.89   10.80
  -5  -7   4  131.09   13.10
  -5   7  -4  128.79    7.70
  -5  -7   4  129.29    8.20
   6  -7   4   70.49    4.70
   6  -7   4   74.89    5.80
   6   7  -4   68.09    5.80
   6  -7   4   54.69    5.40
  -6  -7  -4   66.29    5.30
   6  -7  -4   60.49    4.80
  -6  -7   4   71.39    7.30
  -6  -7   4   59.49    5.50
  -7  -7   4   38.20    5.80
   0  -8   4   14.20    5.20
   0  -8  -4    6.30    4.00
   0   8  -4   10.20    4.10
   0   8   4    8.10    5.70
   0   8  -4   11.80    4.90
   0  -8   4    9.20    2.40
   1  -8   4   70.49    9.60
   1  -8   4   81.69    5.20
   1   8  -4   77.49    9.20
  -1   8   4   86.39   10.80
  -1  -8  -4   79.89    5.90
  -1  -8   4   78.19    5.30
  -1  -8   4   82.09    7.50
  -1   8  -4   81.89    7.20
  -1  -8   4   78.49   11.90
  -1  -8   4   81.09    8.20
   1   8   4  100.79    9.40
  -1   8  -4   77.59    9.50
   2   8  -4  447.26   21.00
  -2  -8  -4  429.96   20.00
   2  -8   4  454.15   18.80
   2  -8   4  454.85   16.70
  -2  -8  -4  476.25   17.00
  -2  -8  -4  439.06   24.60
  -2  -8   4  484.35   22.90
  -2   8  -4  439.46   20.00
  -2   8  -4  475.25   18.50
  -2  -8   4  431.76   20.00
  -2  -8   4  473.15   17.00
   3  -8   4   -1.20    5.10
   3   8  -4    4.50    3.40
   3   8  -4   -2.40    5.20
   3  -8   4    0.90    2.60
  -3  -8  -4    9.10    4.20
  -3  -8  -4   -3.20    3.40
  -3  -8  -4    4.10    2.70
  -3  -8   4    0.30    3.80
  -3   8  -4   -6.60    6.80
  -3  -8   4   15.50    7.90
  -3  -8   4    0.90    3.00
  -3  -8   4    0.50    2.60
  -3   8  -4    0.30    3.60
  -4  -8  -4   31.10   12.40
   4  -8   4   73.79    8.80
  -4  -8  -4   55.99    6.60
  -4  -8  -4   52.39    5.90
  -4  -8  -4   54.79    5.30
   4  -8   4   57.89    7.70
   4  -8   4   59.39    5.00
   4   8  -4   60.39    8.70
  -4   8  -4   43.80    6.20
  -4  -8   4   50.89    5.50
  -4  -8   4   53.09    5.80
  -4  -8   4   38.60    8.10
  -4  -8   4   34.30    8.20
  -4  -8   4   59.39    6.80
   4  -8  -4   51.69    5.70
   5  -8   4    5.60    2.30
   5  -8   4    6.20    4.00
  -5  -8  -4    4.40    2.80
  -5  -8  -4    0.70    3.00
   5  -8   4    2.40    3.60
  -5  -8  -4    3.50    2.50
   5  -8  -4    4.50    2.70
  -5  -8   4   14.60    5.80
  -5  -8   4    6.00    8.00
  -5  -8   4    0.20    3.10
  -6  -8  -4    3.60    2.00
   6  -8   4   -1.40    3.50
   6  -8   4    4.60    2.90
   6  -8   4    2.00    2.00
  -6  -8   4    4.20    2.50
   6  -8  -4    4.60    2.40
  -6  -8   4    3.80    3.90
   0  -9   4   58.59    4.90
   0  -9  -4   63.79    5.80
   0  -9   4   64.89    8.00
   0   9  -4   64.19    8.90
   1  -9   4  137.99    7.00
  -1  -9  -4  139.99    7.30
  -1   9   4  132.39   11.30
   1  -9   4  131.39   10.00
   1   9  -4  137.59   10.30
  -1   9  -4  123.49    8.20
  -1  -9   4  137.89    7.20
   1  -9  -4  124.59    7.80
  -1  -9   4  127.19    9.20
   1   9   4  117.99   10.50
  -1   9  -4  122.89   10.50
  -1  -9   4  124.39    8.40
   2  -9   4  528.15   18.40
  -2  -9  -4  503.05   18.60
  -2  -9  -4  491.75   19.60
   2   9  -4  517.65   21.60
  -2  -9  -4  494.75   20.10
   2  -9   4  513.25   20.20
  -2  -9   4  510.05   19.30
  -2  -9   4  520.55   18.60
   2   9   4  493.75   21.50
  -2   9  -4  500.65   21.50
  -2  -9   4  437.76   26.60
  -2   9  -4  494.85   18.90
  -2  -9   4  500.45   19.80
   2  -9  -4  504.25   21.80
   3  -9   4   19.60    5.00
   3  -9   4   16.50    3.00
   3   9  -4   22.40    5.60
  -3  -9  -4   17.10    4.50
  -3  -9  -4   14.50    3.40
  -3  -9  -4   11.10    3.00
  -3  -9   4   13.50    3.20
  -3  -9   4    9.30    3.70
   3  -9  -4   15.40    4.00
  -3   9  -4   16.50    3.80
  -3  -9   4   11.00   13.60
  -3  -9   4   17.70    3.30
  -3   9  -4   23.30    6.30
  -4  -9  -4  214.58   10.60
  -4  -9  -4  212.08    9.90
   4  -9   4  215.98    9.10
  -4  -9  -4  212.18    9.40
   4  -9   4  203.38   10.80
  -4  -9   4  201.28    9.40
  -4  -9   4  208.48   17.60
  -4  -9   4  206.38    9.60
  -4  -9   4  226.78   10.40
   4  -9  -4  196.58    9.40
  -5  -9  -4  134.09    7.60
   5  -9   4  138.49    6.70
  -5  -9  -4  156.58    6.70
   5  -9   4  136.19    8.20
  -5  -9  -4  144.89    7.20
   5  -9  -4  137.99    7.00
  -5  -9   4  152.28    7.30
  -6  -9  -4    5.90    2.00
   0 -10   4  325.77   12.80
   0 -10  -4  324.87   12.90
   0  10   4  320.57   15.80
   0 -10   4  312.47   14.20
   0 -10   4  301.37   14.00
   0  10  -4  318.67   15.80
   1  10  -4   10.20    4.60
   1 -10   4   14.20    4.70
  -1  10   4    5.10    5.10
  -1 -10  -4    2.80    6.10
  -1 -10  -4   17.70    5.20
   1  10   4   11.40    4.90
  -1 -10   4    8.40    3.20
   1 -10  -4   14.80    5.30
  -1  10  -4    9.70    4.90
  -1 -10   4   19.80    4.40
   2 -10   4   76.89    5.50
   2  10  -4   69.39    8.90
  -2 -10  -4   71.09    5.90
  -2 -10  -4   87.09    7.80
  -2 -10  -4   77.59    7.10
   2 -10   4   56.49    8.20
  -2  10  -4   89.99    8.80
   2  10   4   70.99    8.40
   2 -10  -4   77.29    6.80
  -2 -10   4   76.29    7.00
  -2 -10   4   82.29    6.60
  -2 -10   4   86.49    5.90
   3 -10   4  137.09    9.40
  -3 -10  -4  132.59    7.00
  -3 -10  -4  126.19    7.70
   3 -10   4  135.69    6.90
   3 -10  -4  134.99    7.60
  -3 -10   4  130.09    7.10
  -3 -10   4  132.09    7.20
  -3 -10   4   98.49   14.40
  -3 -10   4  125.89    7.80
  -4 -10  -4  129.19    6.60
  -4 -10  -4  139.79    6.90
  -4 -10  -4  126.09    7.20
   4 -10   4  130.69    6.60
   4 -10   4  134.29    8.60
   4 -10  -4  127.29    7.00
  -4 -10   4  123.69   11.00
  -4 -10   4  146.89    7.30
  -4 -10   4  130.49    6.60
  -5 -10  -4    0.10    2.10
  -5 -10  -4    5.60    2.00
   5 -10   4    0.20    2.00
  -5 -10   4   -0.30    1.90
   0  11  -4  163.28   10.30
   0  11   4  138.49   10.30
   0 -11  -4  166.98   10.50
   0 -11   4  166.78   11.20
   0 -11   4  162.48    8.60
   0 -11   4  158.58    7.90
   0 -11  -4  174.08    8.10
  -1 -11  -4    8.20    3.80
   1  11  -4    8.60    4.20
   1 -11   4   11.80    2.80
  -1 -11  -4    6.30    2.80
   1 -11   4    8.00    4.00
  -1 -11   4   12.70    2.80
  -1 -11   4    6.90    2.90
  -1  11  -4    9.00    4.10
   1 -11  -4   12.00    3.30
   1  11   4    7.60    3.80
   2 -11   4  151.18    7.30
  -2 -11  -4  176.98    9.20
   2 -11   4  141.09    9.10
  -2 -11  -4  150.28    8.30
   2  11  -4  149.69    9.80
  -2 -11  -4  150.98    7.40
  -2 -11   4  154.48    7.80
  -2 -11   4  153.58    7.60
  -2  11  -4  138.39    9.90
   2 -11  -4  149.79    7.90
  -2 -11   4  155.68    8.60
  -3 -11  -4   82.29    5.20
  -3 -11  -4   81.19    5.60
  -3 -11  -4   91.49    6.30
   3 -11   4   76.49    5.00
   3 -11   4   72.29    9.40
   3 -11  -4   80.19    6.20
  -3 -11   4   82.29    5.50
  -3 -11   4   86.39    5.90
  -3 -11   4   86.19    5.10
   4 -11   4    3.50    2.00
  -4 -11  -4    5.70    1.90
  -4 -11  -4    4.70    2.60
  -4 -11  -4    1.10    2.10
  -4 -11   4    4.70    2.20
  -4 -11   4    2.80    2.00
   0 -12   4  415.16   15.30
   0 -12   4  433.76   16.20
   0 -12   4  417.86   15.50
   0 -12  -4  393.46   15.40
   0  12  -4  441.46   17.40
   0 -12  -4  410.76   16.20
   1  12  -4   18.40    3.90
  -1 -12  -4   20.10    2.90
   1 -12   4   15.90    2.60
   1 -12   4   18.50    2.80
   1 -12   4   14.90    3.80
  -1 -12  -4   23.10    3.30
  -1 -12   4   17.70    2.80
  -1  12  -4   13.10    3.90
   1 -12  -4   22.50    3.30
  -1 -12   4   24.00    3.70
   1 -12  -4   26.70    5.00
  -1 -12   4   16.40    2.60
   2 -12   4   17.60    4.90
  -2 -12  -4   21.00    2.80
   2 -12   4   17.50    2.60
   2 -12   4   13.20    2.80
  -2 -12  -4   18.90    3.40
   2  12  -4   10.50    3.10
  -2  12  -4   23.50    4.40
   2 -12  -4   17.80    3.20
  -2 -12   4   16.40    2.70
  -2 -12   4   15.80    2.90
  -2 -12   4   17.20    2.50
  -3 -12  -4   61.69    4.90
  -3 -12  -4   68.19    4.50
   3 -12   4   66.59    4.40
   3 -12   4   66.39    4.60
  -3 -12  -4   73.19    4.10
  -3 -12   4   69.29    4.40
  -3 -12   4   55.29    4.70
  -4 -12   4   72.19    3.80
   0 -13   4   -0.30    1.70
   0 -13   4    2.10    2.20
   0 -13  -4    0.80    2.40
   0 -13   4    2.80    3.00
   0 -13  -4    4.00    2.60
   0  13  -4    2.10    2.80
   1 -13   4   29.30    3.10
  -1 -13  -4   29.10    3.70
   1 -13   4   22.70    3.50
  -1 -13   4   26.80    3.20
   1 -13  -4   40.90    5.70
  -1 -13   4   23.10    3.00
  -1 -13   4   25.80    3.60
  -1  13  -4   30.30    4.80
  -2 -13  -4   41.10    3.30
   2 -13   4   40.20    3.40
  -2 -13   4   44.80    3.20
  -2 -13   4   37.70    3.80
   0   0   5    3.90    1.90
   0   0   5    5.40    1.10
   0   0  -5   -0.50    1.50
   0   0   5    2.30    1.90
  -1   0  -5  250.37   11.20
  -1   0   5  229.98    8.00
   1   0  -5  231.88   10.00
   1   0   5  239.98   10.90
  -1   0  -5  235.48   10.60
  -1   0   5  216.78   10.40
   1   0   5  225.38   11.50
  -2   0   5 1049.20   39.60
   2   0   5 1063.99   41.40
   2   0   5 1067.19   39.70
   2   0  -5 1088.19   38.60
   2   0   5 1035.80   35.60
  -2   0  -5 1128.59   40.40
  -2   0   5 1044.30   34.70
  -2   0  -5 1068.69   35.50
   2   0  -5 1070.39   39.70
  -3   0  -5  825.92   29.00
   3   0  -5  834.92   30.40
   3   0  -5  846.82   40.30
  -3   0   5  835.62   27.80
   3   0  -5  858.61   35.20
   3   0   5  854.51   37.00
  -3   0  -5  875.41   38.30
   3   0   5  800.12   29.30
  -4   0  -5   83.69   25.90
  -4   0  -5   63.49    6.10
   4   0  -5   67.59   17.20
   4   0   5   59.29   18.30
   4   0  -5   90.39   11.90
   4   0   5   70.39    7.50
   4   0   5   73.09    4.80
   4   0  -5   72.29    4.90
  -4   0   5   65.39    4.40
   5   0   5   43.80    4.30
   5   0   5   40.10    6.80
  -5   0  -5   29.60    5.50
   5   0  -5   43.20    4.40
   5   0   5   31.40    4.60
  -5   0  -5   45.80    6.70
  -5   0   5   36.90    6.40
  -5   0  -5   34.90    5.30
   5   0  -5   53.89    6.30
   5   0  -5   50.89   14.70
  -6   0  -5   37.60    5.60
   6   0  -5   37.50    6.00
   6   0   5   51.39    5.10
  -6   0  -5   37.60    5.70
  -6   0   5   42.10    6.70
   6   0  -5   45.60    5.20
  -6   0  -5   31.80    5.30
   6   0   5   27.40    7.50
   6   0  -5   42.50    4.50
   6   0   5   49.40    6.00
   7   0  -5  289.67   12.00
   7   0   5  288.07   12.00
   7   0  -5  286.27   11.40
  -7   0  -5  285.47   12.70
  -7   0   5  295.97   12.20
   8   0   5    7.20    2.00
   8   0  -5    5.90    1.80
  -8   0  -5    5.00    2.20
   0  -1   5 3726.73  119.29
   0   1  -5 3634.44  119.49
   0  -1   5 3506.65  117.09
   0  -1  -5 3699.33  117.69
   0   1  -5 3849.42  119.09
   0  -1   5 3645.24  119.49
  -1  -1  -5    0.90    2.80
   1  -1   5    5.40    1.80
   1  -1   5    4.00    3.90
   1   1  -5    2.60    2.50
  -1   1   5    2.70    2.20
  -1   1  -5    0.50    3.00
   1  -1  -5    2.50    1.70
  -1  -1   5    7.10    3.70
  -1   1  -5   -0.50    1.50
   1   1   5    1.80    1.20
   1   1   5    1.20    3.40
  -1  -1   5    3.10    1.30
   1   1   5    3.80    3.10
   2  -1   5  302.17   15.50
   2   1  -5  312.87   15.40
  -2  -1  -5  285.37   11.40
   2   1  -5  286.37   11.70
  -2  -1  -5  310.57   16.30
   2  -1   5  304.87   18.30
  -2   1   5  299.87   15.00
   2  -1   5  288.67   11.60
   2   1  -5  285.07   17.30
  -2   1  -5  293.77   16.20
   2   1   5  274.57   18.80
   2   1   5  299.87   15.40
   2   1   5  280.47   11.20
   2  -1  -5  311.17   13.60
  -2  -1   5  265.07   17.20
  -2   1  -5  298.87   11.10
   2  -1  -5  283.67   14.50
  -3  -1  -5  323.87   13.10
  -3  -1  -5  320.97   21.30
   3   1  -5  253.77   31.20
   3  -1   5  300.47   13.40
   3   1  -5  330.67   20.50
   3   1  -5  299.77   13.60
   3  -1   5  315.47   21.30
   3  -1   5  311.17   35.40
   3  -1   5  306.57   11.60
   3  -1  -5  337.37   18.50
  -3   1  -5  326.77   12.60
  -3   1  -5  333.77   22.40
   3   1   5  324.17   13.00
   3   1   5  293.77   21.60
  -3  -1   5  337.87   12.20
   3  -1  -5  323.87   24.20
   4  -1   5  172.28    7.50
  -4  -1  -5   98.09   30.90
   4  -1   5  177.98   27.10
  -4  -1  -5  170.78    8.00
   4  -1   5  182.68   11.10
   4   1  -5  132.49   19.70
   4   1  -5  164.48   11.70
  -4  -1  -5  175.68    9.60
   4   1  -5  165.48    7.60
   4   1   5  186.68   30.30
   4   1   5  171.48   10.10
   4   1   5  171.98    7.60
   4  -1  -5  155.18   27.20
  -4   1  -5  172.48    8.90
   4  -1  -5  169.68    7.70
  -4  -1   5  176.28    8.20
   5  -1   5 1149.89   37.80
  -5   1   5 1120.69   39.00
   5   1  -5 1122.89   42.20
  -5  -1  -5 1110.29   39.90
  -5  -1  -5 1167.78   40.20
  -5  -1  -5 1107.49   38.90
   5   1  -5 1090.69   38.40
   5  -1   5 1133.09   39.00
   5   1  -5 1169.18   38.00
   5   1   5 1149.78   41.10
   5  -1  -5 1085.69   39.00
   5   1   5 1108.29   37.60
   5   1   5 1118.39   38.90
   5  -1  -5 1093.79   38.70
   5  -1  -5 1179.68   38.10
  -5  -1   5 1169.58   37.50
  -5  -1   5 1158.78   39.60
  -5   1  -5 1139.59   39.10
  -5   1  -5 1115.59   39.10
  -5   1  -5 1124.49   39.80
  -6   1   5  281.27   12.70
  -6  -1  -5  279.67   13.20
   6  -1   5  283.27   12.70
  -6  -1  -5  278.17   14.20
   6   1  -5  248.78   20.90
   6  -1   5  286.17   18.70
   6   1  -5  279.37   12.00
  -6  -1  -5  276.97   13.90
   6  -1   5  276.37   11.70
   6   1  -5  290.67   11.60
   6   1  -5  283.97   12.70
   6  -1  -5  292.47   11.60
  -6  -1   5  299.77   13.30
   6   1   5  283.67   12.60
  -6   1  -5  285.37   13.60
   6  -1  -5  282.77   12.20
   6  -1  -5  281.17   12.90
   6   1   5  288.27   16.50
   7   1  -5   71.99    5.40
   7  -1   5   69.19    5.80
  -7  -1  -5   81.59    6.90
   7  -1   5   69.09    6.40
   7   1  -5   70.99    5.80
  -7   1   5   79.99    5.80
   7  -1  -5   79.39    5.10
   7  -1  -5   78.89    5.90
   7   1   5   84.19    5.90
  -7   1  -5   85.89    6.50
  -7  -1   5   72.19    6.20
   7   1   5   75.89    7.00
  -8  -1  -5   29.50    3.60
   8  -1   5   25.30    3.20
   8  -1   5   25.70    4.60
   8   1  -5   28.20    3.00
   8   1   5   22.30    3.40
   8  -1  -5   29.60    3.20
  -8   1  -5   22.00    3.30
   0   2   5  320.77   11.10
   0  -2   5  314.67   14.50
   0  -2   5  307.07   11.50
   0   2  -5  327.27   14.00
   0  -2  -5  311.37   11.40
   0   2  -5  299.97   14.10
   0   2  -5  310.57   11.20
   1   2  -5  690.53   24.30
  -1  -2  -5  720.43   27.00
   1  -2   5  670.93   29.00
   1  -2   5  691.43   24.50
  -1  -2  -5  776.92   27.20
   1   2  -5  751.12   27.60
   1  -2   5  727.73   28.30
   1   2   5  732.53   27.10
  -1  -2   5  739.93   24.40
  -1  -2   5  729.33   28.90
   1   2   5  756.72   26.80
  -1   2  -5  740.03   24.20
   1   2   5  738.73   23.60
  -1   2  -5  648.04   27.90
   2   2  -5  471.75   25.50
   2  -2   5  479.35   21.50
  -2  -2  -5  471.85   25.00
   2   2  -5  475.45   17.30
   2   2  -5  475.85   22.00
  -2  -2  -5  484.15   22.20
  -2  -2  -5  448.96   17.20
   2  -2   5  465.95   24.50
   2  -2   5  459.15   17.40
  -2   2  -5  491.45   22.50
   2   2   5  489.75   22.20
  -2   2  -5  454.45   16.50
   2   2   5  437.56   25.00
  -2  -2   5  460.85   16.80
   2   2   5  457.85   16.60
   2  -2  -5  471.75   19.30
   2  -2  -5  502.65   18.60
  -3  -2  -5 1355.56   46.30
  -3  -2  -5 1313.67   55.09
   3  -2   5 1280.87   62.09
   3  -2   5 1425.66   54.39
  -3  -2  -5 1390.26   44.90
   3   2  -5 1407.56   44.90
   3   2  -5 1304.87   46.30
   3  -2   5 1386.76   44.80
   3   2  -5 1328.97   52.99
  -3   2  -5 1388.66   45.50
   3   2   5 1400.66   46.00
   3  -2  -5 1348.67   53.29
  -3  -2   5 1407.76   45.80
   3  -2  -5 1360.56   50.19
   3   2   5 1338.57   54.39
  -3   2  -5 1467.05   55.89
  -4  -2  -5   78.19    5.50
   4  -2   5   86.89   20.00
  -4  -2  -5   45.70   24.80
  -4  -2  -5   79.29    7.30
   4  -2   5   76.99    7.50
  -4  -2  -5   79.69    7.10
   4   2  -5   80.49    5.00
   4   2  -5   75.49   20.80
   4   2  -5   74.79    7.40
   4  -2   5   97.29    9.80
  -4  -2  -5   79.89    7.50
   4   2  -5   82.49    8.80
   4  -2   5   82.49    5.00
   4  -2  -5   76.89    5.60
  -4   2  -5   82.59    8.50
   4  -2  -5   94.69   17.60
   4   2   5   72.09   20.50
   4   2   5   83.59    5.50
  -4  -2   5   83.49    6.30
  -4  -2   5   75.39    7.80
   4   2   5   91.09    7.40
   4   2   5   66.39    7.30
  -4   2  -5   87.89    6.10
  -5  -2  -5  142.89   11.00
   5  -2   5  140.09    8.60
   5  -2   5  140.19    7.10
   5  -2   5  146.89   14.20
  -5  -2  -5  151.48    8.30
   5   2  -5  144.79    8.70
  -5  -2  -5  160.48   10.90
   5   2  -5  148.59    7.30
  -5  -2  -5  144.39    9.00
  -5   2   5  151.28    8.70
   5   2  -5  158.78   13.10
   5  -2  -5  147.89   10.30
  -5  -2   5  133.59   12.70
  -5   2  -5  153.48    8.20
  -5  -2   5  150.08   10.30
   5   2   5  142.99   10.40
  -5   2  -5  156.98   11.10
   5  -2  -5  147.99    7.30
   5  -2  -5  136.69    9.60
   5   2   5  143.59    7.90
   5   2   5  133.49    8.70
  -5  -2   5  147.89    8.60
   6   2  -5  234.38   23.20
   6  -2   5  265.47   13.70
  -6  -2  -5  281.77   14.70
  -6  -2  -5  277.07   12.60
   6   2  -5  281.37   12.70
  -6  -2  -5  277.87   14.10
   6   2  -5  257.77   13.90
   6   2  -5  289.57   11.80
  -6   2   5  270.17   12.30
   6  -2   5  301.47   30.80
   6  -2   5  267.87   12.40
  -6  -2   5  284.97   13.20
  -6   2  -5  291.67   13.40
   6  -2  -5  286.17   12.30
   6  -2  -5  308.67   13.00
   6   2   5  290.37   12.60
   6   2   5  270.07   15.70
  -7   2   5   36.20    4.80
   7  -2   5   35.70    4.10
   7  -2   5   35.90    4.70
   7   2  -5   29.40    5.30
   7   2  -5   36.80    4.60
  -7  -2  -5   40.20    6.20
   7  -2  -5   32.90    3.80
  -7   2  -5   36.80    5.10
   7   2   5   35.30    4.80
   7  -2  -5   36.40    5.00
   8  -2   5   -0.50    1.90
   8  -2   5    3.90    2.30
   8   2  -5    1.50    1.70
  -8  -2  -5   -1.40    2.10
   8  -2  -5    2.50    2.10
  -8  -2   5   -3.30    1.90
   0  -3   5   28.00    3.90
   0   3  -5   25.10    4.80
   0  -3   5   44.80    7.70
   0   3   5   34.00    3.50
   0  -3  -5   33.20    4.20
   0   3  -5   40.40    6.90
   0   3  -5   29.40    2.90
   1  -3   5  282.27   11.30
   1  -3   5  254.97   16.20
   1  -3   5  275.37   16.90
   1   3  -5  303.27   15.50
   1   3  -5  269.87   15.20
  -1  -3  -5  273.37   13.80
   1   3  -5  272.57   10.70
  -1  -3  -5  264.37   14.80
   1   3   5  290.17    9.30
   1   3   5  285.67   13.70
  -1   3  -5  287.17   15.20
  -1  -3   5  275.97   11.00
   1   3   5  321.97   15.50
  -1  -3   5  248.88   17.20
  -2  -3  -5  452.85   17.60
  -2  -3  -5  471.95   23.20
   2   3  -5  423.36   31.30
  -2  -3  -5  462.05   27.30
   2  -3   5  423.16   25.30
   2   3  -5  458.65   17.00
   2  -3   5  462.65   17.80
   2   3  -5  461.55   23.30
   2  -3  -5  488.75   18.80
  -2   3  -5  437.76   23.60
  -2  -3   5  467.35   17.10
   2   3   5  477.95   16.30
   2  -3  -5  480.25   17.60
   2   3   5  434.66   22.60
  -2   3  -5  461.75   16.20
   3   3  -5   11.10   11.70
  -3  -3  -5   14.40   12.40
  -3  -3  -5   25.60    3.60
   3  -3   5   25.80    3.40
   3   3  -5   28.20    3.50
  -3  -3  -5   19.90    4.30
   3   3  -5   23.50    4.30
   3  -3   5   20.90    5.60
   3  -3   5   34.20   11.20
  -3   3  -5   21.10   14.70
   3   3   5   11.30   11.50
   3   3   5   26.60    4.20
   3  -3  -5   32.60   12.00
  -3  -3   5   19.20    3.40
   3  -3  -5   15.30    8.00
  -3   3  -5   22.70    3.50
   4   3  -5  524.25   18.50
   4   3  -5  487.35   48.30
   4  -3   5  513.45   20.10
   4  -3   5  523.45   18.40
   4   3  -5  567.84   21.70
   4  -3   5  548.75   23.40
  -4  -3  -5  525.15   19.40
  -4  -3  -5  517.55   23.40
  -4  -3  -5  548.15   21.40
  -4  -3  -5  502.25   18.90
  -4   3   5  507.05   19.70
  -4  -3  -5  519.05   20.20
   4   3  -5  528.85   19.40
   4   3   5  549.05   48.80
  -4   3  -5  536.05   18.80
  -4  -3   5  519.05   21.00
   4   3   5  503.35   19.80
  -4   3  -5  528.25   20.30
   4  -3  -5  500.65   18.60
   4  -3  -5  476.75   36.60
  -4  -3   5  515.25   20.40
   5   3  -5  719.03   24.90
  -5  -3  -5  716.13   27.80
  -5  -3  -5  697.73   24.40
   5   3  -5  709.13   24.30
   5  -3   5  707.53   25.70
  -5  -3  -5  702.03   24.80
  -5  -3  -5  710.73   25.80
   5   3  -5  733.73   28.40
   5  -3   5  724.13   30.80
   5  -3   5  702.93   24.40
  -5  -3   5  672.13   26.00
   5   3   5  673.83   26.80
   5  -3  -5  673.73   25.90
   5   3   5  680.93   25.30
  -5   3  -5  694.83   25.90
  -5  -3   5  695.03   26.50
   5  -3  -5  711.73   24.40
   5  -3  -5  653.93   26.50
   6   3  -5  115.39    7.70
   6   3  -5  127.19    6.90
  -6  -3  -5  115.99    9.80
   6  -3   5  119.69    7.80
  -6   3   5  104.29    7.50
   6   3  -5  124.09    6.80
   6   3  -5  110.59   12.90
  -6  -3  -5  114.99    8.00
  -6  -3  -5  103.29   11.10
   6  -3   5  125.39    6.70
   6  -3   5  125.89   19.10
   6  -3  -5  107.59    8.60
   6  -3  -5  116.09    6.60
  -6   3  -5  109.19    8.10
  -6  -3   5  111.79    8.70
   6   3   5  119.49    7.70
   6  -3  -5  131.79    7.60
   6   3   5  111.49   10.80
   7   3  -5   44.50    4.60
   7  -3   5   33.90    4.50
   7  -3   5   47.30    4.60
  -7  -3  -5   42.00    6.10
  -7  -3  -5   44.80    6.10
  -7  -3   5   37.20    5.30
   7  -3  -5   36.60    5.10
   7   3   5   39.60    5.10
  -7   3  -5   44.70    5.00
   7  -3  -5   40.30    3.80
   8   3  -5   11.40    2.00
   8  -3   5    8.70    2.20
   8  -3   5   10.90    2.00
  -8  -3  -5    9.20    2.90
  -8  -3   5   13.90    3.20
   0   4  -5  153.08    6.50
   0  -4  -5  154.58    9.00
   0   4   5  149.29    7.50
   0  -4   5  159.28    8.00
   0   4  -5  141.79   11.00
   0  -4   5  135.59   16.00
   1   4  -5 1350.96   49.40
  -1  -4  -5 1267.37   47.40
   1   4  -5 1293.47   42.60
   1  -4   5 1336.37   43.70
   1  -4   5 1231.48   49.50
   1   4  -5 1372.46   48.70
   1   4   5 1317.37   46.10
  -1  -4   5 1249.88   43.50
  -1   4  -5 1280.47   48.20
  -1   4  -5 1269.27   42.10
  -1  -4   5 1194.58   52.29
  -2  -4  -5  196.98   11.40
   2  -4   5  144.49   24.70
   2  -4   5  201.48   11.40
   2  -4   5  233.78   25.90
  -2  -4  -5  212.28   29.70
   2   4  -5  200.78   17.00
   2   4  -5  207.18    9.30
  -2   4  -5  189.98   19.90
  -2  -4   5  203.18    9.80
  -2  -4   5  210.88    8.40
  -2   4  -5  209.28    8.30
   2  -4  -5  202.08   11.50
   2   4   5  209.48    8.00
   2  -4  -5  206.88    8.80
   2   4   5  211.48   17.40
  -3  -4  -5  623.34   24.20
   3  -4   5  585.44   34.90
   3   4  -5  664.13   37.90
   3  -4   5  596.34   25.20
  -3  -4  -5  625.94   21.60
   3  -4   5  620.54   21.50
   3   4  -5  626.34   21.50
   3   4  -5  628.34   23.30
   3   4   5  649.24   22.40
   3  -4  -5  629.44   27.40
  -3  -4   5  628.94   21.60
   3   4   5  571.44   37.70
  -3   4  -5  645.04   21.40
  -3  -4   5  641.34   23.50
   4  -4   5   90.09   11.80
   4   4  -5  104.19    6.00
  -4  -4  -5  103.09    7.30
   4   4  -5  114.39    6.90
   4   4  -5  111.09    9.00
   4  -4   5  120.89    8.30
  -4  -4  -5  100.39    8.00
  -4  -4  -5  103.99   11.30
  -4  -4  -5   99.29    6.10
  -4  -4  -5  106.49   14.70
   4  -4   5  108.89    5.80
  -4   4   5   84.59    8.90
   4   4   5  102.39    7.40
  -4  -4   5   96.59    8.00
  -4  -4   5  114.79    8.40
  -4   4  -5  100.79    7.90
   4  -4  -5  132.59   10.20
  -4  -4   5   94.19    8.30
  -4  -4   5   97.89    9.70
   4   4   5  100.89   38.00
   4   4   5  111.89    8.80
   5  -4   5  564.54   19.60
  -5  -4  -5  539.55   20.60
  -5  -4  -5  531.65   19.40
  -5   4   5  521.45   19.80
  -5  -4  -5  553.44   24.00
   5   4  -5  555.74   23.10
  -5  -4  -5  540.85   19.80
  -5  -4  -5  548.55   23.50
   5   4  -5  525.35   19.50
   5  -4   5  520.05   20.40
   5   4  -5  533.85   19.20
  -5  -4   5  574.14   22.00
  -5  -4   5  535.65   21.80
  -5  -4   5  544.75   20.70
   5   4   5  513.65   21.30
   5  -4  -5  538.95   19.30
   5   4   5  531.55   20.30
  -5   4  -5  511.25   20.60
   6   4  -5    4.40    6.50
   6   4  -5    5.90    3.30
   6   4  -5    8.40    2.50
  -6  -4  -5    8.90    3.20
   6  -4   5    8.50    2.70
  -6  -4  -5   13.50    5.50
  -6  -4  -5   11.40    6.80
   6  -4   5    2.50    3.20
   6   4   5   10.00    3.50
  -6   4  -5    6.00    3.30
   6  -4  -5    6.00    3.30
   6  -4  -5    3.60    4.50
  -6  -4   5    4.30    5.70
  -6  -4   5    3.70    4.20
   6  -4  -5    6.50    2.60
  -6  -4   5   10.40    4.10
   6   4   5   12.90    5.50
   7  -4   5   27.70    4.30
   7  -4   5   29.00    4.20
  -7  -4  -5   36.20    5.90
   7  -4   5   29.40    4.40
   7   4  -5   35.40    4.00
  -7  -4  -5   29.50    3.70
  -7   4  -5   37.20    4.50
  -7  -4   5   40.10    5.00
   7  -4  -5   37.40    5.50
   7  -4  -5   32.20    3.80
   7   4   5   42.20    5.50
   0   5  -5 1415.36   46.40
   0  -5   5 1339.57   58.59
   0  -5  -5 1492.55   49.70
   0   5  -5 1400.96   54.49
   0  -5   5 1442.16   47.90
   0   5  -5 1385.26   53.99
   1  -5   5  165.58   25.60
   1   5  -5  202.88    8.70
   1   5  -5  211.78   18.20
  -1  -5  -5  217.28   21.50
   1  -5   5  209.78   12.00
   1   5  -5  206.88   20.00
   1  -5   5  203.68    8.80
   1  -5   5  175.28   30.20
  -1   5  -5  189.58   19.40
  -1  -5   5  190.78   10.00
  -1   5  -5  206.68    8.00
   1   5   5  204.48   16.40
  -1  -5   5  204.98    8.30
   2   5  -5  436.46   29.50
   2   5  -5  420.06   15.80
   2  -5   5  398.56   14.50
  -2  -5  -5  404.66   14.80
   2   5  -5  394.06   29.80
  -2   5  -5  427.06   14.10
   2   5   5  399.56   13.40
  -2  -5   5  403.56   14.60
   2   5   5  381.36   27.10
  -2  -5   5  387.96   16.50
   3   5  -5   60.19   21.20
   3  -5   5   67.69   19.40
   3  -5   5   74.59    4.60
  -3  -5  -5   56.59    6.30
   3   5  -5   66.09    5.70
   3   5  -5   74.49    6.70
  -3  -5  -5   61.89   10.40
   3   5  -5   53.59    6.50
  -3  -5  -5   61.29   10.90
  -3  -5   5   72.39    5.10
  -3  -5   5   63.09    6.90
  -3   5  -5   81.49    7.30
   3   5   5   72.19    5.20
  -3  -5   5   62.99    7.40
  -3  -5   5   66.99    7.40
   4   5  -5  333.17   13.40
  -4  -5  -5  348.97   13.50
  -4  -5  -5  351.66   18.00
   4   5  -5  347.17   13.70
   4  -5   5  335.67   14.90
  -4  -5  -5  349.87   14.20
  -4  -5  -5  357.36   15.00
   4   5  -5  359.36   15.90
   4  -5   5  368.06   13.40
  -4  -5   5  345.97   16.10
  -4  -5   5  355.66   15.00
   4   5   5  352.16   14.30
  -4   5  -5  335.57   14.70
   4   5   5  319.57   15.20
  -4  -5   5  336.77   13.60
   4  -5  -5  352.56   13.60
  -4  -5   5  350.36   14.00
  -4  -5   5  336.07   16.60
  -5  -5  -5   12.80    4.20
  -5  -5  -5   10.20    7.30
   5  -5   5   10.60    2.70
   5   5  -5   17.30    5.60
   5   5  -5    9.20    3.10
   5  -5   5    3.80    3.70
  -5  -5  -5    2.60    7.50
  -5  -5  -5   10.90    3.30
  -5  -5  -5    9.80    3.30
   5   5   5   11.10    4.50
   5   5   5   15.30    4.50
  -5   5  -5   13.90    3.80
  -5  -5   5   11.60    4.20
  -5  -5   5   12.10    5.30
   5  -5  -5   12.50    2.80
  -5  -5   5    7.90    5.10
   6  -5   5   21.80    3.00
  -6  -5  -5   32.10    5.20
   6   5  -5   18.90    3.40
  -6  -5  -5   12.10    5.70
  -6  -5  -5   23.70    7.80
   6   5  -5   31.70    6.80
   6  -5  -5   22.90    5.40
  -6  -5   5   23.20    5.20
   6   5   5   23.60    4.30
   6  -5  -5   24.20    3.90
  -6  -5   5   28.20    4.30
   6   5   5   22.40    6.20
  -6   5  -5   23.90    4.80
  -6  -5   5   23.90    6.60
   7  -5   5   77.69    5.20
   7  -5   5   78.89    5.00
  -7  -5  -5   65.49    7.00
   7   5  -5   78.79    4.90
   7  -5   5   82.09    5.00
  -7  -5  -5   91.29   11.10
   7  -5  -5   82.59    4.60
  -7   5  -5   80.19    6.30
  -7  -5   5   74.09    5.70
   0   6  -5  117.69    5.70
   0  -6   5  100.89   10.40
   0  -6   5  129.29    6.00
   1   6  -5  520.65   32.10
  -1  -6  -5  474.85   18.30
   1  -6   5  517.75   17.90
   1   6  -5  537.85   18.60
   1  -6   5  501.65   22.40
  -1   6  -5  524.15   17.20
  -1  -6   5  502.85   20.70
  -1  -6   5  521.05   18.00
   2   6  -5  194.98    9.20
   2   6  -5  204.08   28.60
   2  -6   5  176.08    7.80
  -2  -6  -5  186.68    8.20
  -2  -6   5  184.18   11.30
  -2  -6   5  186.08    8.10
  -2  -6   5  165.78   10.60
  -2   6  -5  196.08   10.70
  -2  -6   5  201.68   10.10
   2   6   5  173.28   11.60
  -3  -6  -5   17.80    5.20
   3  -6   5   10.10    2.60
  -3  -6  -5    8.40    4.50
   3   6  -5   -4.50    7.60
   3   6  -5    6.80    3.40
   3  -6   5   13.40    4.80
  -3  -6  -5   14.20    9.00
  -3  -6  -5    7.10    2.70
  -3  -6   5    5.10    2.80
  -3   6  -5   16.30    3.90
  -3  -6   5   14.90    5.20
  -3  -6   5   20.80    8.20
  -3  -6   5    8.90    4.00
  -3  -6   5   13.00    3.50
  -4  -6  -5  298.67   12.90
  -4  -6  -5  303.37   18.10
   4   6  -5  290.47   16.50
   4  -6   5  282.27   13.30
  -4  -6  -5  295.47   13.40
  -4  -6  -5  298.47   12.10
   4  -6   5  294.87   11.80
  -4  -6   5  293.27   12.40
  -4  -6   5  292.97   15.00
   4   6   5  282.07   11.40
  -4  -6   5  298.27   15.60
  -4  -6   5  297.17   13.40
   4  -6  -5  296.67   12.20
  -4   6  -5  276.07   12.90
  -4  -6   5  297.67   12.50
   5  -6   5  375.16   14.10
   5   6  -5  292.67   20.30
   5  -6   5  364.16   14.90
  -5  -6  -5  366.66   15.30
   5   6  -5  363.86   14.90
  -5  -6  -5  370.46   14.20
  -5  -6  -5  355.46   14.40
   5  -6  -5  375.86   14.10
  -5  -6   5  385.06   17.00
  -5  -6   5  361.66   15.10
  -5   6  -5  362.36   14.80
   6  -6   5   15.30    2.70
   6  -6   5   21.50    3.50
  -6  -6  -5   35.00   12.90
  -6  -6  -5   17.20    3.10
   6  -6   5   19.00    3.60
   6   6  -5   16.70    3.40
  -6  -6  -5   16.20    6.40
  -6  -6   5   16.80    3.60
  -6  -6   5   20.80    4.70
  -6   6  -5   15.20    3.20
   7   6  -5   39.50    5.40
   7  -6   5   22.40    3.60
  -7  -6  -5   26.20    4.90
  -7  -6  -5   22.30    2.90
   7  -6   5   32.80    4.00
   7  -6   5   23.70    3.60
  -7  -6   5   34.80    4.70
   7  -6  -5   24.70    3.40
   0  -7   5  218.28    9.20
   0   7  -5  220.18   13.40
   0   7   5  234.98   14.20
   0   7  -5  232.58   11.50
   0   7  -5  223.28    8.00
   0  -7   5  208.48   15.40
   1   7  -5  186.38   12.40
   1  -7   5  177.28   13.50
  -1  -7  -5  180.68    8.70
   1   7  -5  192.48    8.30
  -1  -7   5  186.48   10.90
   1   7   5  192.08   12.40
  -1  -7   5  186.98    8.20
  -1   7  -5  206.18   10.40
  -1  -7   5  176.78   13.30
  -1   7  -5  179.38   12.50
   2   7  -5  261.87   14.20
  -2  -7  -5  241.28   13.90
   2  -7   5  258.37   10.20
   2  -7   5  260.67   13.20
   2   7  -5  255.77   11.00
  -2  -7  -5  232.98   13.90
  -2  -7  -5  253.77   10.50
  -2   7  -5  256.07   14.60
  -2  -7   5  246.88   11.60
   2   7   5  250.37   14.00
  -2  -7   5  263.67   15.00
  -2  -7   5  243.58   12.40
  -2  -7   5  248.78   10.30
  -2   7  -5  251.17   12.10
  -3  -7  -5   95.19    6.10
   3   7  -5   93.09    7.40
  -3  -7  -5   84.09    8.40
   3  -7   5   85.09   12.20
   3  -7   5  104.69    8.70
   3  -7   5  102.89    5.70
   3   7  -5   99.99   11.30
  -3  -7  -5   92.99    8.10
  -3  -7   5   99.79   11.10
  -3  -7   5   91.19   14.30
  -3   7  -5   94.39   12.00
  -3  -7   5   94.19    6.70
  -3   7  -5   84.19    7.70
  -4  -7  -5   33.70   10.50
   4  -7   5   35.60    5.30
  -4  -7  -5   21.70    3.80
   4   7  -5   30.90    5.40
   4  -7   5   24.30    3.30
   4  -7   5   32.00    5.20
  -4  -7  -5   33.70    4.80
  -4  -7  -5   29.70    4.70
  -4  -7   5   26.70    3.80
  -4  -7   5   32.80    4.90
  -4   7  -5   35.10    5.90
  -4  -7   5   28.90    7.40
  -4  -7   5   37.90    5.50
  -4  -7   5   32.10    7.40
   4  -7  -5   29.30    4.00
  -5  -7  -5   23.40    4.10
  -5  -7  -5   15.10    9.40
   5  -7   5   27.80    4.30
   5   7  -5   15.50    3.60
   5  -7   5   17.20    2.80
  -5  -7  -5   21.80    3.40
   5   7  -5   17.90    5.80
  -5  -7  -5   26.00    3.50
   5  -7   5   23.30    4.40
  -5  -7   5   21.10    5.30
  -5   7  -5   21.50    3.80
  -5  -7   5   21.60    7.10
   5  -7  -5   26.00    3.60
  -5  -7   5   20.90    3.70
   6  -7   5   46.80    5.20
  -6  -7  -5   57.89    5.00
   6   7  -5   56.69    5.30
   6  -7   5   49.80    5.20
   6  -7   5   55.89    4.40
  -6  -7   5   49.10    6.50
  -6  -7   5   48.60    5.10
   0   8  -5  261.67   14.10
   0   8   5  282.57   14.70
   0   8  -5  245.98   12.00
   0  -8   5  265.97   13.00
   0  -8   5  271.07   10.80
   1   8  -5   30.40    5.70
  -1   8   5   46.10    7.40
   1  -8   5   34.90    4.00
   1  -8   5   34.60    5.60
  -1  -8  -5   29.40    4.80
  -1   8  -5   25.40    4.40
  -1  -8   5   29.90    5.30
  -1  -8   5   27.70    4.50
   1   8   5   27.60    6.00
  -1   8  -5   37.20    6.40
  -1  -8   5   21.20    3.20
   2  -8   5  454.75   23.00
   2   8  -5  433.96   15.30
  -2  -8  -5  418.66   18.10
  -2  -8  -5  435.66   16.00
  -2  -8  -5  421.66   17.80
   2  -8   5  453.75   15.80
  -2   8  -5  389.36   19.40
   2   8   5  345.57   23.40
  -2  -8   5  437.76   16.20
  -2  -8   5  412.36   21.60
   3  -8   5   24.90    5.30
  -3  -8  -5   14.00    3.70
   3  -8   5   17.70    2.80
   3   8  -5   16.70    6.00
  -3  -8  -5    7.00    4.30
  -3  -8  -5   11.20    2.90
   3   8  -5   16.20    3.70
  -3  -8   5   16.40    3.30
  -3   8  -5   16.10    6.40
  -3  -8   5   31.00    8.50
  -3  -8   5   10.20    4.00
  -3  -8   5   10.40    3.10
  -3   8  -5    8.00    3.80
   4  -8   5  100.59    9.70
   4   8  -5   82.69    7.90
  -4  -8  -5  105.99    7.30
   4  -8   5  104.69    8.20
   4   8  -5   95.09    8.40
  -4  -8  -5  102.99    7.90
  -4  -8  -5  111.49    6.70
   4  -8   5  105.69    6.20
  -4  -8   5  101.69    7.70
   4  -8  -5  104.99    7.30
  -4  -8   5  109.79   12.20
  -4  -8   5  108.79   13.90
  -4  -8   5  103.19    7.30
  -4   8  -5  109.19    7.20
  -4  -8   5  105.29    6.70
   5  -8   5   22.90    4.00
   5  -8   5   35.90    4.00
   5  -8   5   33.40    4.90
  -5  -8  -5   30.90    4.40
  -5  -8  -5   23.20    3.60
  -5  -8  -5   31.50    5.00
  -5  -8   5   29.50    8.40
  -5  -8   5   27.90    3.80
   5  -8  -5   30.50    4.70
  -5  -8   5   19.40    5.50
   6  -8   5   38.20    4.50
   6  -8   5   27.90    3.90
  -6  -8  -5   29.30    3.60
  -6  -8   5   22.70    4.10
   6  -8  -5   26.10    4.00
  -6  -8   5   30.50    4.30
   0  -9   5   48.40    7.40
   0  -9   5   46.50    4.70
   0   9   5   52.89    7.40
   0   9  -5   58.79    8.70
   0  -9  -5   46.90    5.70
  -1  -9  -5  222.38   10.10
   1  -9   5  225.08   12.10
   1  -9   5  235.08    9.90
  -1   9   5  212.68   13.90
   1   9  -5  236.78   13.40
  -1  -9   5  220.98   10.90
  -1  -9   5  237.58   10.00
   1   9   5  233.28   12.90
  -1   9  -5  214.98   10.80
  -1   9  -5  225.38   13.30
  -1  -9   5  225.18   11.70
  -2  -9  -5  458.85   18.70
  -2  -9  -5  447.26   18.40
   2  -9   5  466.95   16.90
  -2  -9  -5  478.55   17.30
   2  -9   5  441.76   18.50
   2   9  -5  454.45   20.10
  -2   9  -5  451.95   17.60
  -2  -9   5  464.15   18.50
   2   9   5  442.86   19.90
  -2  -9   5  458.15   17.80
  -2  -9   5  465.65   24.90
  -2   9  -5  447.66   19.90
  -2  -9   5  458.15   17.10
   3  -9   5   72.69    7.80
  -3  -9  -5   75.99    5.80
   3   9  -5   74.29    9.10
  -3  -9  -5   84.29    7.40
  -3  -9  -5   71.19    7.00
   3  -9   5   80.29    5.70
  -3  -9   5   64.19    6.70
  -3  -9   5   64.89    5.90
  -3  -9   5   74.19   11.30
  -3   9  -5   60.39    9.60
  -3   9  -5   77.49    6.60
  -3  -9   5   68.59    5.80
   4  -9   5   22.10    3.10
  -4  -9  -5   15.10    3.20
  -4  -9  -5   14.00    2.80
   4  -9   5   13.80    4.20
  -4  -9   5   12.00    3.40
  -4  -9   5   10.70    3.80
  -4  -9   5    9.90    8.40
   4  -9  -5   22.10    3.90
   5  -9   5   13.40    3.40
  -5  -9  -5   18.90    3.40
  -5  -9  -5   17.00    2.80
  -5  -9  -5   11.20    2.40
   5  -9   5   15.20    2.50
  -5  -9   5   24.90    4.00
   5  -9  -5   16.50    3.10
  -5  -9   5   25.20    8.90
  -6  -9  -5  190.28    7.50
   0  10   5    4.70    6.20
   0 -10   5    1.30    2.50
   0  10  -5    6.90    4.50
   0 -10   5    1.80    3.80
   0 -10   5   -5.30    3.10
  -1 -10  -5   21.50    4.00
  -1  10   5   20.50    5.80
   1 -10   5   43.00    6.70
  -1 -10  -5   25.10    5.80
   1  10  -5   26.30    5.70
   1  10   5   17.70    4.90
   1 -10  -5   25.00    4.30
  -1 -10   5   33.50    5.40
  -1 -10   5   27.10    4.80
  -1  10  -5   42.50    7.70
   2 -10   5   98.99    8.20
  -2 -10  -5  108.29    7.70
  -2 -10  -5  101.49    8.40
   2  10  -5  101.89    9.30
   2 -10   5   98.79    6.10
  -2 -10  -5   99.99    6.60
  -2 -10   5   99.69    6.90
   2 -10  -5  107.19    7.60
  -2  10  -5   95.89    9.20
  -2 -10   5   93.29    7.50
  -2 -10   5  103.79    6.50
  -3 -10  -5  349.37   13.50
  -3 -10  -5  346.47   14.40
   3 -10   5  348.17   14.60
   3  10  -5  357.86   17.70
  -3 -10  -5  340.57   16.60
   3 -10   5  354.86   13.30
  -3 -10   5  289.67   25.20
  -3  10  -5  337.87   16.20
   3 -10  -5  343.47   13.70
  -3 -10   5  356.76   13.60
  -3 -10   5  352.16   14.50
  -3 -10   5  340.07   13.40
  -4 -10  -5   19.60    3.00
   4 -10   5   22.90    3.90
   4 -10   5   23.30    3.70
  -4 -10  -5   20.30    3.40
  -4 -10  -5   23.30    3.90
  -4 -10   5   18.40    2.90
  -4 -10   5   17.70    2.70
   4 -10  -5   20.40    3.60
   5 -10   5   11.00    2.20
  -5 -10  -5    5.80    2.10
  -5 -10  -5    6.30    2.10
  -5 -10   5    5.50    2.20
   0 -11  -5   70.39    5.90
   0  11   5   85.19    8.10
   0 -11   5   73.39    6.10
   0  11  -5   77.89    8.00
   0 -11   5   72.19    5.50
   0 -11   5   67.49    9.50
   0 -11  -5   96.09   11.20
   1  11  -5    8.40    3.90
  -1 -11  -5    8.20    2.80
  -1 -11  -5    2.10    3.90
   1 -11   5    7.80    3.80
   1 -11   5    4.10    2.50
  -1 -11   5    6.90    2.60
  -1 -11   5    8.10    3.00
   1 -11  -5    7.30    3.20
  -1  11  -5    7.50    4.90
   2 -11   5   13.80    4.00
   2  11  -5   11.10    4.30
  -2 -11  -5   13.50    2.70
  -2 -11  -5   19.30    4.10
  -2 -11  -5   13.60    3.20
   2 -11   5    7.70    2.40
  -2  11  -5   10.10    4.50
  -2 -11   5    6.60    2.40
  -2 -11   5   10.90    2.70
  -2 -11   5   12.60    3.50
   2 -11  -5   12.50    3.70
   3 -11   5  126.59    8.20
  -3 -11  -5  137.59    7.60
  -3 -11  -5  139.59    6.70
  -3 -11  -5  147.89    7.10
   3 -11   5  135.39    6.50
   3 -11  -5  138.89    7.90
  -3 -11   5  136.19    7.30
  -3 -11   5  142.49    6.70
  -4 -11  -5   28.00    3.70
  -4 -11  -5   29.10    4.00
  -4 -11  -5   28.90    3.40
   4 -11   5   32.90    3.40
  -4 -11   5   36.70    3.60
   0 -12   5    5.80    2.40
   0 -12  -5    8.30    2.90
   0 -12  -5   12.30    3.80
   0 -12   5    7.50    2.30
   0 -12   5    2.80    3.10
   0  12  -5   12.10    3.80
   1 -12   5   35.60    5.70
   1  12  -5   36.10    5.70
  -1 -12  -5   39.60    4.30
   1 -12   5   42.10    4.20
   1 -12   5   42.00    4.00
  -1 -12  -5   32.70    5.20
   1 -12  -5   40.80    5.00
  -1 -12   5   33.50    4.10
  -1 -12   5   36.10    4.10
  -1 -12   5   51.49    5.20
  -1  12  -5   38.10    5.80
   2 -12   5   25.60    3.50
  -2 -12  -5   24.50    3.80
  -2 -12  -5   19.50    2.60
   2 -12   5   22.90    3.50
   2  12  -5   17.30    3.30
   2 -12   5   24.30    4.40
  -2 -12  -5   25.90    4.30
   2 -12  -5   20.00    3.60
  -2 -12   5   20.20    2.80
  -2  12  -5   26.60    4.50
  -2 -12   5   26.30    3.90
  -2 -12   5   18.50    2.50
  -3 -12  -5  150.78    6.30
  -3 -12  -5  140.79    6.40
  -3 -12  -5  149.59    6.90
   3 -12   5  143.29    7.30
   3 -12   5  142.59    6.40
  -3 -12   5  143.29    6.00
  -3 -12   5  149.09    6.70
   0 -13  -5   68.29    5.60
   0 -13   5   67.69    4.10
   0 -13   5   69.19    5.30
   0  13  -5   65.79    5.80
   0 -13  -5   70.09    5.40
   0 -13   5   58.79    4.50
   1 -13   5   37.20    3.30
  -1 -13  -5   33.20    3.70
  -1 -13  -5   36.50    3.80
   1 -13   5   30.60    3.50
  -1  13  -5   42.60    4.80
  -1 -13   5   31.30    4.60
  -1 -13   5   26.00    3.90
  -2 -13  -5    5.10    1.80
   2 -13   5    5.80    1.80
  -2 -13   5   -0.30    1.90
  -2 -13   5    0.70    1.70
   0   0   6 5120.69  164.58
   0   0  -6 5406.96  164.88
   0   0   6 5014.90  162.68
   0   0   6 4986.50  164.68
   1   0   6   10.20    4.30
  -1   0   6    4.00    1.00
  -1   0  -6    1.90    3.20
  -1   0   6    6.60    3.30
  -1   0  -6    3.70    2.00
   1   0  -6    3.80    2.40
  -2   0   6  576.64   25.90
  -2   0  -6  649.74   26.50
  -2   0  -6  600.94   21.30
   2   0   6  620.24   26.20
   2   0  -6  617.14   26.00
   2   0  -6  621.54   24.30
  -2   0   6  603.24   20.20
   2   0   6  619.44   28.60
   2   0   6  615.04   21.40
   3   0  -6   16.80    7.90
  -3   0  -6   17.50   10.10
  -3   0  -6   16.80    3.20
   3   0  -6   27.40    6.30
   3   0   6   12.10    9.50
   3   0   6   16.60    3.40
   3   0  -6   23.60   13.70
  -3   0   6   16.90    2.50
   4   0  -6  670.53   39.20
   4   0  -6  675.83   29.10
  -4   0  -6  639.54   23.30
   4   0   6  672.73   24.80
   4   0  -6  695.53   23.40
   4   0   6  706.93   43.10
   4   0   6  669.83   23.10
  -4   0  -6  595.54   53.89
  -4   0  -6  709.33   25.10
   4   0   6  695.93   25.80
   5   0   6  210.88    8.90
  -5   0  -6  198.58   10.70
   5   0   6  197.68   13.20
   5   0  -6  201.98    9.00
  -5   0  -6  212.88   11.90
  -5   0   6  205.38   10.70
   5   0  -6  186.08   10.10
   5   0   6  204.58   10.30
  -5   0  -6  198.28   11.10
  -6   0  -6  264.67   13.10
   6   0  -6  273.37   11.40
  -6   0   6  258.27   12.40
   6   0   6  251.07   16.30
   6   0  -6  258.27   12.20
   6   0  -6  288.87   11.80
  -6   0  -6  264.07   12.90
   6   0   6  266.17   12.10
  -6   0  -6  260.57   13.20
  -7   0   6   47.00    5.20
   7   0  -6   53.89    5.20
   7   0   6   40.30    5.50
   7   0   6   43.60    5.00
   7   0  -6   38.80    4.40
   7   0  -6   45.00    4.30
  -7   0  -6   49.00    5.80
   8   0  -6   22.90    2.90
   8   0   6   25.20    3.10
  -8   0  -6   29.30    3.60
   0  -1   6    2.10    1.40
   0  -1   6    2.30    3.30
   0   1   6    1.10    2.00
   0   1  -6    4.80    2.50
   0   1  -6    1.20    2.50
   0  -1  -6   -0.10    1.60
   0  -1   6    4.60    3.30
  -1   1   6  381.66   14.40
   1   1  -6  391.66   16.30
   1  -1   6  384.86   13.90
  -1  -1  -6  410.76   16.60
   1  -1   6  374.06   17.50
   1   1   6  394.36   16.50
  -1  -1   6  395.96   13.60
  -1   1  -6  395.56   13.90
   1  -1  -6  414.46   14.50
  -1  -1   6  384.66   17.30
  -1   1  -6  404.26   17.10
   1   1   6  390.46   13.50
   1   1   6  386.96   16.90
   2  -1   6   55.69   10.10
   2   1  -6   43.70    7.50
   2   1  -6   51.59    9.60
   2  -1   6   46.80    4.10
   2  -1   6   37.40    6.70
  -2   1   6   62.59    9.80
   2   1  -6   35.50    5.40
  -2  -1  -6   64.99    9.00
  -2  -1  -6   41.80    4.40
   2   1   6   41.10    6.90
  -2  -1   6   42.70    3.30
   2  -1  -6   48.90    6.90
   2  -1  -6   46.50    6.50
   2   1   6   43.80    3.70
  -2  -1   6   40.30    9.00
   2   1   6   48.60    9.60
  -2   1  -6   43.10    7.60
   3   1  -6   23.60    3.80
  -3  -1  -6   13.00    3.20
   3  -1   6   13.30    3.60
   3   1  -6    9.40    4.50
   3  -1   6   12.50    2.40
  -3  -1  -6   24.40   10.70
  -3  -1  -6   16.40    2.60
   3  -1   6   45.30   22.80
   3   1  -6  -23.80   16.10
   3  -1   6   22.80   10.70
   3   1   6   15.20    3.10
  -3  -1   6   12.40    2.30
   3  -1  -6   22.10   12.40
  -3   1  -6   13.00    2.90
   3   1   6   -8.30    9.30
   3  -1  -6    9.30    7.40
  -3   1  -6   16.10   10.80
   4  -1   6   25.20   20.10
  -4  -1  -6   44.30   23.80
  -4  -1  -6   29.50    4.80
   4   1  -6   30.20    6.60
   4  -1   6   30.60    5.60
   4  -1   6   28.90    4.70
  -4  -1  -6   28.50    4.50
   4   1  -6    6.60   15.70
   4   1  -6   28.20    3.70
   4  -1   6   32.20    3.60
  -4  -1  -6   28.40    5.00
   4   1   6   39.80    5.00
  -4  -1   6   33.70    4.30
   4   1   6   32.00    5.00
  -4   1  -6   30.30    5.20
  -4  -1   6   29.40    5.20
  -4   1  -6   45.60    6.90
   4   1   6   30.00   19.90
   4  -1  -6   29.30   15.60
   4  -1  -6   31.60    4.30
   4   1   6   34.90    4.00
   5   1  -6  234.58   16.50
   5  -1   6  235.48   14.50
  -5   1   6  229.08   11.10
  -5  -1  -6  207.48   10.40
   5   1  -6  223.28    9.60
   5  -1   6  221.48    9.40
   5   1  -6  209.38   10.40
   5  -1   6  230.08   10.90
  -5  -1  -6  218.28   11.40
  -5  -1  -6  226.08   12.60
  -5  -1  -6  225.68   12.30
  -5  -1   6  224.08   11.30
   5   1   6  221.08    9.50
  -5   1  -6  234.48   11.80
   5   1   6  228.98   13.20
   5  -1  -6  205.18   11.00
   5   1   6  212.88   10.90
  -5   1  -6  211.68   11.70
   5  -1  -6  236.18    9.70
  -5   1  -6  232.68   11.30
   5  -1  -6  202.38   11.50
  -6   1   6   80.99    7.00
   6   1  -6   86.99    6.20
   6  -1   6   81.69    6.90
  -6  -1  -6   81.99    9.70
   6  -1   6   66.69    9.80
  -6  -1  -6   87.79    8.00
   6   1  -6   96.39   15.40
   6   1  -6   98.99    7.40
  -6  -1  -6   89.19    8.50
   6   1   6   96.79   11.60
  -6  -1   6  103.19    7.60
   6  -1  -6   92.09    8.20
  -6   1  -6   98.69    8.10
   6  -1  -6   89.29    6.60
   6  -1  -6   84.69    7.60
   6   1   6   88.59    6.90
   7   1  -6   90.39    6.30
   7  -1   6   95.39    6.40
  -7   1   6   98.89    6.20
  -7  -1  -6   92.29    7.40
   7   1  -6   87.99    5.80
  -7   1  -6  102.29    7.10
   7  -1  -6  103.69    6.50
   7   1   6  104.69    6.40
  -7  -1   6  105.69    6.70
   7  -1  -6   98.89    5.60
   7   1   6   97.99    7.40
   8  -1   6   61.59    3.80
  -8  -1  -6   61.59    4.20
   8   1  -6   55.39    3.80
   8   1   6   57.29    4.00
   8  -1  -6   59.79    4.30
  -8   1  -6   58.79    3.90
   0   2  -6   51.59    3.70
   0  -2   6   58.99    7.70
   0   2   6   55.49    3.70
   0  -2   6   54.29    3.80
   0   2  -6   47.50    6.00
   0  -2   6   52.49    8.30
   0   2  -6   50.59    5.90
   0  -2  -6   61.59    3.90
  -1  -2  -6   35.60    5.80
   1  -2   6   22.20    6.30
   1  -2   6   35.90    6.50
   1   2  -6   36.20    3.60
   1   2  -6   32.20    5.70
   1  -2   6   39.80    3.90
   1   2  -6   27.70    4.90
   1  -2  -6   40.20    3.00
  -1  -2   6   34.70    7.10
  -1   2  -6   35.40    6.00
   1   2   6   38.60    2.30
   1   2   6   37.60    6.20
  -1   2  -6   37.90    3.20
  -1  -2   6   39.00    3.30
   1   2   6   37.30    6.00
  -2  -2  -6    4.60    5.40
   2  -2   6    6.10    9.80
   2   2  -6    7.40   10.20
  -2  -2  -6   21.70   10.50
   2  -2   6   13.80    3.20
  -2  -2  -6   12.70    3.10
   2   2  -6   10.20    5.50
   2   2  -6   13.10    3.00
   2  -2  -6   15.70    3.90
   2   2   6   13.80    5.70
  -2   2  -6   17.80    6.90
   2  -2  -6    3.60    4.40
  -2   2  -6   10.60    2.10
   2   2   6   11.20    2.20
  -2  -2   6    8.30    2.00
  -3  -2  -6  369.96   15.20
   3  -2   6  310.37   40.80
   3   2  -6  333.77   53.39
  -3  -2  -6  363.76   24.80
  -3  -2  -6  377.16   13.70
   3  -2   6  369.76   13.40
   3   2  -6  370.86   15.60
   3  -2   6  352.86   23.00
   3   2  -6  380.66   13.70
   3   2  -6  343.67   22.70
  -3  -2   6  401.66   14.50
  -3   2  -6  389.16   26.60
   3  -2  -6  382.96   20.10
  -3   2  -6  384.46   14.40
   3   2   6  380.56   25.10
   3  -2  -6  361.36   24.80
   3   2   6  396.96   14.80
   4   2  -6  -10.60   18.30
   4  -2   6   47.80   19.10
   4  -2   6    9.00    5.20
  -4  -2  -6   -1.30   24.40
  -4  -2  -6    8.60    2.60
   4  -2   6   11.60    4.30
   4   2  -6   12.90    4.20
  -4  -2  -6   10.50    3.60
  -4  -2  -6    8.80    4.10
  -4  -2  -6    8.90    4.30
   4   2  -6    0.80    5.20
  -4   2   6   -3.50    6.60
  -4   2  -6    7.90    3.20
  -4  -2   6    4.90    2.90
   4   2   6   12.00    3.20
   4   2   6    3.40    3.70
   4  -2  -6    8.30    2.90
  -4  -2   6   11.30    4.50
   4  -2  -6   18.00   16.70
  -4   2  -6   12.60    4.90
   4   2   6   -2.40   21.70
   4   2   6    9.20    4.20
  -5  -2  -6  168.18   11.00
   5  -2   6  161.48   14.10
  -5  -2  -6  164.48    8.70
   5  -2   6  160.18    7.70
   5   2  -6  141.19   13.70
  -5  -2  -6  161.88   10.70
  -5   2   6  165.48    9.60
   5   2  -6  168.38    7.90
  -5   2  -6  164.88    9.00
   5  -2  -6  161.68    7.90
   5  -2  -6  170.18   10.30
   5   2   6  163.28   10.90
  -5  -2   6  164.08    8.90
   5  -2  -6  157.78   10.70
   6  -2   6  369.86   15.70
   6   2  -6  392.56   14.80
   6  -2   6  371.86   31.80
  -6  -2  -6  383.36   15.80
   6  -2   6  404.06   14.80
  -6  -2  -6  383.76   17.30
   6   2  -6  389.26   29.00
  -6   2   6  399.66   17.10
   6   2  -6  413.96   15.10
   6   2  -6  386.26   15.90
  -6  -2  -6  414.56   23.10
   6   2   6  323.27   22.80
  -6  -2   6  389.06   16.60
   6  -2  -6  393.56   14.80
   6   2   6  414.66   15.80
   6  -2  -6  392.56   16.00
  -6   2  -6  378.16   16.40
   6  -2  -6  375.26   15.40
   7   2  -6   38.80    4.60
  -7   2   6   34.30    4.80
  -7  -2  -6   41.40    6.10
   7  -2   6   36.20    4.80
   7  -2  -6   29.30    3.90
   7   2   6   28.90    4.70
  -7   2  -6   35.50    5.20
  -7  -2   6   31.20    4.90
   7  -2  -6   24.40    3.50
   8  -2   6   25.00    3.00
  -8  -2  -6   19.30    2.70
   8   2  -6   28.80    3.00
   8  -2   6   18.80    3.40
   0  -3   6  357.66   14.00
   0   3  -6  391.06   18.10
   0   3  -6  376.76   17.30
   0   3   6  375.86   13.10
   0   3  -6  388.66   13.70
   0  -3   6  397.66   20.60
  -1  -3  -6  642.94   25.00
   1   3  -6  623.44   26.30
   1  -3   6  627.84   28.60
   1   3  -6  659.13   27.00
   1  -3   6  631.54   22.30
   1   3  -6  622.34   21.90
  -1  -3  -6  610.64   25.50
   1  -3   6  635.94   27.80
  -1   3  -6  669.43   27.00
  -1   3  -6  633.84   21.60
  -1  -3   6  609.14   28.80
   1   3   6  597.04   25.40
   1   3   6  659.23   24.80
  -1  -3   6  632.04   22.10
   2  -3   6  240.08   11.10
  -2  -3  -6  231.28   20.80
   2   3  -6  243.98   10.50
   2   3  -6  259.67   17.40
   2  -3   6  199.88   24.70
   2  -3   6  210.88   22.40
  -2  -3  -6  218.18   11.30
  -2  -3  -6  247.58   16.80
   2   3  -6  195.88   26.20
   2   3   6  259.47   16.70
  -2   3  -6  261.77   18.00
   2   3   6  253.97    9.40
  -2   3  -6  233.88    9.60
  -2  -3   6  235.18   10.20
   2  -3  -6  259.27   12.00
   2  -3  -6  262.17   10.20
   3   3  -6   54.49    4.20
  -3  -3  -6   62.19    6.70
   3  -3   6   65.49   13.70
   3   3  -6   41.90   12.30
  -3  -3  -6   60.79   14.20
  -3  -3  -6   51.39    4.20
   3  -3   6   53.39    4.00
   3   3  -6   52.89    6.10
   3  -3   6   54.79    7.70
  -3   3  -6   38.80   27.80
  -3   3  -6   50.79    4.50
  -3  -3   6   53.59    5.20
   3  -3  -6   49.30    9.00
   3   3   6   55.49    5.00
   3   3   6   38.80   13.60
  -4  -3  -6   29.60   29.00
  -4   3   6   29.10    5.10
   4  -3   6   32.30    5.10
   4  -3   6   22.00    6.90
  -4  -3  -6   25.40    4.10
  -4  -3  -6   20.20    3.70
   4   3  -6   23.80    5.70
  -4  -3  -6   27.80    5.00
   4  -3   6   25.00    3.50
  -4  -3  -6   15.80    8.00
   4   3  -6   26.20    4.20
   4   3  -6   31.90    3.90
  -4  -3  -6   36.00    6.00
   4  -3  -6   26.20    3.70
  -4  -3   6   33.10    5.30
  -4  -3   6   27.70    5.70
   4   3   6   21.40    3.80
  -4   3  -6   19.90    5.00
   4   3   6   27.30    4.80
   4   3   6   36.00   26.20
  -4  -3   6   26.70    5.50
   4  -3  -6    8.40   18.40
   5  -3   6   37.00    5.90
   5   3  -6   27.00    6.90
  -5  -3  -6   32.90    5.30
   5   3  -6   30.00    4.40
   5  -3   6   35.40    9.10
  -5  -3  -6   27.60    3.90
  -5   3   6   26.80    4.50
   5   3  -6   32.90    5.00
  -5  -3  -6   27.90    4.70
  -5  -3  -6   23.60    6.10
   5  -3   6   35.40    4.30
   5   3   6   20.30    5.70
   5   3   6   28.20    4.30
   5  -3  -6   32.70    4.40
  -5  -3   6   39.50    5.80
  -5  -3   6   17.70    8.90
  -5   3  -6   31.30    4.90
  -5  -3   6   25.70    4.70
   6  -3   6  177.38   21.80
   6  -3   6  172.58    9.30
   6   3  -6  176.78    8.40
   6   3  -6  170.08    8.40
  -6  -3  -6  182.08   11.50
   6   3  -6  176.48   14.50
   6  -3   6  173.28    8.20
  -6  -3  -6  168.08    9.30
   6   3  -6  172.18    9.20
  -6   3   6  182.48    8.80
  -6  -3  -6  154.38   12.60
   6  -3  -6  187.88   10.30
   6  -3  -6  165.18    9.00
   6   3   6  154.58   11.50
   6   3   6  175.68    9.20
  -6  -3   6  189.08   10.20
   6  -3  -6  170.68    8.20
  -6   3  -6  165.08    9.70
   7   3  -6   52.49    4.70
   7  -3   6   43.10    6.40
  -7  -3  -6   42.90    5.90
  -7  -3  -6   51.69    6.40
   7  -3   6   45.60    4.70
   7  -3   6   55.39    5.10
  -7  -3   6   57.09    5.60
   7  -3  -6   53.69    5.50
   7  -3  -6   44.20    4.00
  -7   3  -6   43.30    5.10
   7   3   6   52.29    5.20
   8  -3   6   38.80    3.30
   0   4  -6  959.90   37.80
   0  -4  -6  983.70   32.60
   0   4  -6  946.31   36.90
   0   4  -6  955.30   31.80
   0  -4   6  942.81   32.60
   0  -4   6  911.21   40.10
   1  -4   6  400.56   25.50
   1   4  -6  400.86   15.00
   1   4  -6  404.86   22.30
  -1  -4  -6  371.76   20.80
   1  -4   6  388.46   26.00
   1  -4   6  398.76   16.10
   1   4  -6  405.66   21.70
  -1   4  -6  415.76   14.60
  -1  -4   6  434.56   19.70
   1   4   6  424.56   19.10
   2  -4   6  361.86   13.30
   2   4  -6  390.26   24.90
  -2  -4  -6  363.36   16.50
   2  -4   6  330.87   32.20
  -2  -4  -6  344.17   22.70
  -2  -4  -6  401.86   33.60
   2   4  -6  378.06   14.60
   2   4  -6  376.16   22.50
   2   4   6  367.16   12.90
  -2   4  -6  374.76   13.60
   2   4   6  347.47   22.20
  -2  -4   6  377.66   14.90
   2  -4  -6  392.76   15.10
  -2  -4   6  366.46   13.40
  -3  -4  -6  620.84   24.50
  -3  -4  -6  609.94   21.70
   3   4  -6  625.54   21.50
   3  -4   6  562.54   34.00
   3  -4   6  654.63   21.60
   3  -4   6  606.94   24.80
   3   4  -6  650.63   23.60
   3   4  -6  663.03   38.50
  -3  -4   6  640.64   23.50
  -3   4  -6  665.23   21.90
   3   4   6  535.05   37.40
  -3  -4   6  626.14   21.70
   3   4   6  653.23   22.20
   3  -4  -6  596.04   25.30
  -4  -4  -6   28.40    5.00
   4  -4   6   30.30    5.00
  -4  -4  -6   37.30    6.60
   4   4  -6   30.00    4.10
   4  -4   6   25.30    9.20
   4   4  -6   30.80    5.50
  -4  -4  -6   40.10    5.60
   4  -4   6   32.40    3.90
  -4  -4  -6   32.20    4.30
   4   4  -6   33.40    5.40
  -4  -4   6   34.00    5.20
  -4   4  -6   30.80    5.10
   4   4   6   32.30    5.20
   4   4   6   19.90    3.70
  -4  -4   6   26.60    4.90
  -4  -4   6   32.80    6.00
  -5  -4  -6  148.49    7.70
   5  -4   6  127.99   19.30
   5   4  -6  145.29    7.90
  -5  -4  -6  142.19    9.10
  -5  -4  -6  145.99   12.80
  -5  -4  -6  160.68   12.60
   5   4  -6  165.18   11.70
  -5  -4  -6  157.68    8.30
   5  -4   6  148.29    8.90
   5   4  -6  146.99    7.60
   5  -4   6  152.78    7.50
  -5  -4   6  155.38   10.20
   5   4   6  153.78    9.20
   5  -4  -6  150.18    7.50
  -5  -4   6  149.19   10.20
  -5  -4   6  139.79    9.50
   5   4   6  137.89    9.70
  -5   4  -6  148.69    9.20
  -6  -4  -6   88.29    6.80
   6   4  -6   82.69    5.40
   6  -4   6   80.99    6.70
   6  -4   6   78.59    5.70
  -6  -4  -6   85.89    9.70
   6   4  -6   80.99   12.30
  -6  -4  -6   73.69   11.50
   6   4  -6   86.89    6.40
   6  -4  -6   73.49    5.50
   6   4   6   81.29    6.80
  -6   4  -6   82.49    7.00
   6  -4  -6   81.69    6.80
   6   4   6   99.09    9.60
  -6  -4   6   93.69    7.80
  -7  -4  -6  230.18   10.90
  -7  -4  -6  217.08    9.70
   7  -4   6  216.08    9.80
   7  -4   6  217.58    9.40
   7  -4   6  227.88    9.40
   7   4  -6  227.28    9.40
   7  -4  -6  231.98   12.90
  -7  -4   6  235.58   10.30
   7  -4  -6  227.78   10.20
  -7   4  -6  241.18    9.60
   0   5  -6  555.74   28.60
   0  -5  -6  575.04   22.10
   0   5  -6  562.74   27.00
   0  -5   6  529.45   20.90
   0   5  -6  557.24   19.40
   0  -5   6  547.35   19.10
   1   5  -6   99.79   16.10
   1   5  -6  111.39   14.80
   1   5  -6   95.79    5.60
   1  -5   6   78.09    4.90
   1  -5   6   51.79   24.70
  -1   5  -6   92.49    4.90
  -1   5  -6   74.89   12.80
   1   5   6   91.89   14.00
  -1  -5   6   89.79    7.00
  -2  -5  -6  603.74   21.10
   2  -5   6  614.14   24.70
   2   5  -6  581.64   21.10
   2   5  -6  624.44   22.30
   2  -5   6  612.34   20.90
   2   5  -6  597.94   33.30
   2   5  -6  611.34   35.90
  -2   5  -6  624.84   20.90
  -2  -5   6  606.84   23.00
   2   5   6  613.04   45.50
  -2  -5   6  611.34   21.00
  -3  -5  -6  110.89    9.10
   3   5  -6   90.29    7.20
   3  -5   6   66.59   19.80
  -3  -5  -6   98.49    5.90
   3  -5   6   93.89   13.50
   3   5  -6   97.99    6.20
   3   5  -6  110.19    7.80
  -3  -5  -6  104.99   12.60
   3  -5   6   86.29    7.40
  -3  -5  -6   91.69    9.10
   3   5  -6   83.19   25.10
   3  -5   6   96.19    8.50
   3   5   6  106.79    5.70
  -3   5  -6   95.79    4.00
  -3  -5   6  107.19    6.00
  -3  -5   6   99.29    8.10
  -3  -5   6  103.59    7.60
  -3  -5   6   81.39   11.60
  -3   5  -6  106.39    8.10
  -3  -5   6  105.59    8.10
   4   5  -6  246.18   13.10
   4   5  -6  235.98   10.40
  -4  -5  -6  243.98   12.00
  -4  -5  -6  260.67   10.60
   4   5  -6  258.57   10.80
  -4  -5  -6  247.08   11.30
   4  -5   6  249.97   10.20
   4  -5   6  246.88   12.00
  -4  -5  -6  260.27   15.90
  -4   5  -6  232.88   11.80
  -4  -5   6  257.27   13.30
  -4  -5   6  256.17   12.00
  -4  -5   6  250.07   13.00
   4   5   6  259.57   11.20
   4  -5  -6  225.58   10.70
  -4  -5   6  250.87   11.20
   5   5  -6  459.15   16.80
  -5  -5  -6  463.25   18.30
   5  -5   6  442.16   18.10
   5  -5   6  466.35   17.00
   5   5  -6  440.16   20.30
  -5  -5  -6  455.05   17.40
  -5  -5  -6  465.75   22.50
  -5  -5  -6  461.65   17.10
   5  -5  -6  462.75   16.90
   5   5   6  472.55   18.10
  -5  -5   6  495.55   19.70
  -5   5  -6  478.05   18.20
  -5  -5   6  438.36   19.90
   5   5   6  437.26   18.10
  -5  -5   6  454.75   18.10
  -6  -5  -6   70.29    8.00
  -6  -5  -6   73.19   10.00
   6  -5   6   72.39    5.20
  -6  -5  -6   76.79   10.20
  -6  -5  -6   75.79    6.50
   6   5  -6   82.09   11.80
  -6  -5   6   80.49    7.20
   6   5   6   74.19    7.60
   6  -5  -6   64.09    5.20
  -6  -5   6   75.29   11.10
   7  -5   6   15.20    2.60
  -7  -5  -6   16.00    4.50
  -7  -5  -6   14.90    4.50
   7   5  -6   13.40    2.50
   7  -5   6   13.60    2.50
   7  -5   6   11.30    2.80
  -7   5  -6   16.90    3.80
  -7  -5   6   18.00    3.10
   7  -5  -6   11.30    2.20
   0  -6   6   24.60    3.50
   0  -6   6   26.80    5.70
   0   6  -6   31.20    3.70
   1  -6   6  185.08    7.80
   1  -6   6  182.88   13.30
  -1  -6  -6  161.78    8.90
   1   6  -6  192.18    8.70
  -1  -6   6  189.28    7.90
  -1   6  -6  184.08    7.50
  -1  -6   6  194.98   11.40
   2   6  -6  208.68   10.00
  -2  -6  -6  210.68    9.10
   2  -6   6  202.18    8.60
   2   6  -6  228.98   31.10
   2   6   6  204.18   12.70
  -2  -6   6  191.48   10.90
  -2  -6   6  220.18    9.00
  -2  -6   6  221.78   10.60
  -2  -6   6  211.18   12.30
  -2   6  -6  213.98   10.90
  -3  -6  -6  406.96   17.70
  -3  -6  -6  450.25   16.20
   3  -6   6  428.26   15.80
   3   6  -6  386.96   17.60
  -3  -6  -6  402.06   17.50
   3  -6   6  426.46   17.60
  -3  -6  -6  422.46   23.00
   3   6  -6  413.66   21.10
   3   6  -6  441.96   17.60
  -3   6  -6  426.56   20.70
  -3  -6   6  434.06   17.60
  -3  -6   6  479.95   19.40
  -3  -6   6  449.16   16.70
  -3   6  -6  448.96   17.30
  -3  -6   6  439.86   16.00
  -3  -6   6  476.25   20.60
   4   6  -6  122.09    9.50
  -4  -6  -6  128.89    7.10
  -4  -6  -6  124.69   15.00
  -4  -6  -6  138.79    9.00
   4  -6   6  129.69    8.60
   4  -6   6  137.29    6.90
  -4  -6  -6  129.59    8.10
  -4  -6   6  139.99   10.90
  -4  -6   6  122.89    8.00
  -4   6  -6  120.99    8.30
  -4  -6   6  110.79   11.00
  -4  -6   6  121.99    8.00
  -4  -6   6  129.59    8.80
  -5  -6  -6   79.29    6.90
  -5  -6  -6   89.79    6.30
   5  -6   6   84.19    6.90
  -5  -6  -6   84.49    6.30
   5   6  -6   73.89   10.80
  -5  -6  -6   85.79   14.40
   5  -6   6   91.39    5.80
  -5  -6   6   94.69    9.20
  -5   6  -6   84.19    6.90
   5  -6  -6   86.69    6.20
  -5  -6   6   84.89    7.10
  -5  -6   6   85.99   12.10
   6  -6   6   43.30    5.10
  -6  -6  -6   38.60    5.40
   6   6  -6   46.90    5.00
   6  -6   6   43.30    4.50
   6  -6   6   48.30    5.70
  -6  -6  -6   39.80    7.30
  -6  -6  -6   50.99    5.20
   6  -6  -6   51.89    4.60
  -6  -6   6   50.19    6.50
  -6  -6   6   48.80    5.90
  -6   6  -6   43.80    5.20
  -7  -6  -6   43.50    4.20
   7  -6   6   37.80    3.90
   7  -6   6   46.70    3.80
   7   6  -6   43.50    4.30
   7  -6  -6   42.80    3.90
  -7  -6   6   37.90    4.20
   0   7  -6   -5.30    5.40
   0   7  -6    0.70    2.10
   0   7  -6    4.10    4.20
   0  -7   6    3.40    4.90
   0  -7   6   -1.00    6.90
   1   7  -6  333.67   14.80
   1  -7   6  353.56   13.10
   1   7  -6  347.67   17.10
  -1  -7  -6  357.76   13.60
  -1   7   6  304.37   19.30
   1   7  -6  360.36   13.50
   1  -7   6  343.07   15.60
  -1  -7   6  357.56   13.20
  -1  -7   6  360.36   14.70
  -1   7  -6  336.87   14.90
  -1  -7   6  358.26   15.30
  -1  -7   6  341.57   17.60
  -1   7  -6  362.76   16.70
   1   7   6  353.06   16.90
   2   7  -6   13.40    6.20
  -2  -7  -6   18.00    3.00
   2   7  -6   17.40    3.30
   2  -7   6   15.80    2.70
   2  -7   6   10.20    5.30
  -2  -7  -6   24.80    6.20
  -2  -7  -6   25.50    6.20
  -2   7  -6   29.30    6.30
  -2  -7   6   16.70    4.50
  -2  -7   6   15.90    6.20
  -2  -7   6   17.50    3.80
   2   7   6   18.50    5.50
  -2  -7   6   28.70    4.00
  -2   7  -6   14.60    4.60
   3  -7   6  155.08   10.50
  -3  -7  -6  165.58   14.20
   3   7  -6  171.78   17.50
   3  -7   6  174.68   11.50
  -3  -7  -6  148.69   14.00
   3  -7   6  169.98    7.90
  -3  -7  -6  171.88    8.40
   3   7  -6  169.78    9.50
  -3  -7   6  166.48    9.00
  -3  -7   6  182.18   12.90
  -3  -7   6  168.58   10.30
  -3  -7   6  135.49   14.60
  -3   7  -6  161.78   12.90
  -3  -7   6  185.28    9.50
   4   7  -6  205.58   11.30
  -4  -7  -6  201.58   10.80
  -4  -7  -6  204.18   10.20
  -4  -7  -6  196.08    9.20
  -4  -7  -6  175.18   20.00
   4  -7   6  199.88   10.50
   4  -7   6  200.48    8.90
   4  -7   6  192.48   11.20
   4  -7  -6  189.38   10.70
  -4  -7   6  192.38   10.40
  -4  -7   6  197.08    9.50
  -4  -7   6  193.68   13.30
  -4  -7   6  203.98    9.60
  -4  -7   6  189.48   14.10
  -4   7  -6  194.98   10.30
   5  -7   6   21.80    3.10
   5   7  -6   33.10    5.50
  -5  -7  -6   27.20    3.60
   5  -7   6   34.90    5.50
   5   7  -6   20.00    6.00
  -5  -7  -6   18.30   10.90
  -5  -7  -6   24.00    3.50
   5  -7   6   34.20    4.70
  -5  -7  -6   24.70    4.00
  -5  -7   6   39.50    7.30
  -5  -7   6   28.00    5.50
   5  -7  -6   26.70    3.70
  -5   7  -6   29.70    3.90
  -5  -7   6   34.30    5.50
   6  -7   6   85.09    5.60
   6  -7   6   83.69    6.10
  -6  -7  -6   86.79    5.50
   6  -7   6   84.19    5.10
   6   7  -6   71.99    5.60
   6  -7  -6   86.09    5.20
  -6  -7   6   83.79    7.20
  -6  -7   6   87.19    6.00
   0   8  -6   91.19    9.70
   0   8  -6   91.29    7.50
   0  -8   6   88.09    5.50
   0  -8   6  101.99    8.20
   0   8   6   87.09    9.90
   1  -8   6    2.40    2.40
  -1  -8  -6    1.30    2.90
  -1   8   6   -0.30    6.30
   1   8  -6    2.20    4.60
   1  -8   6    5.10    4.60
  -1  -8   6    1.60    2.40
  -1   8  -6   10.30    3.80
  -1  -8   6   -2.90    3.80
  -1  -8   6   -2.50    3.40
  -1   8  -6    3.40    5.20
   1   8   6   -2.20    4.60
  -1  -8   6   -1.60    7.60
  -2  -8  -6  340.47   16.50
  -2  -8  -6  375.96   14.30
   2   8  -6  365.86   20.20
   2  -8   6  371.56   14.10
   2   8  -6  367.76   14.10
  -2  -8  -6  343.27   16.30
  -2  -8   6  372.36   15.80
  -2  -8   6  371.36   15.00
  -2  -8   6  356.36   19.40
  -2  -8   6  374.26   14.20
   2   8   6  365.56   17.30
  -2   8  -6  389.56   16.00
  -3  -8  -6 1056.19   37.10
   3   8  -6 1040.40   36.40
   3   8  -6 1041.00   38.90
  -3  -8  -6 1046.90   37.20
   3  -8   6 1107.29   36.10
  -3  -8  -6 1099.09   36.40
   3  -8   6 1077.89   37.30
  -3  -8   6 1047.40   36.50
  -3  -8   6 1115.19   36.20
  -3  -8   6 1104.59   37.70
  -3   8  -6 1042.90   38.70
  -3  -8   6 1042.80   40.60
  -3   8  -6 1044.30   36.80
  -4  -8  -6   47.40    5.10
   4  -8   6   44.80    4.60
   4  -8   6   44.40    6.10
  -4  -8  -6   37.60    5.50
   4   8  -6   47.40    7.20
   4  -8   6   41.20    6.50
   4   8  -6   39.30    5.30
  -4  -8  -6   45.30    6.10
   4  -8  -6   39.60    4.60
  -4  -8   6   39.40    6.40
  -4  -8   6   26.80    7.60
  -4  -8   6   31.30    5.20
  -4   8  -6   38.50    5.70
  -4  -8   6   37.80    7.00
  -4  -8   6   43.00    6.10
  -5  -8  -6   47.30    5.50
   5  -8   6   74.49    6.90
   5  -8   6   43.80    4.50
   5  -8   6   58.69    6.20
  -5  -8  -6   56.39    5.00
  -5  -8  -6   64.99    5.80
  -5  -8   6   70.49    5.90
  -5  -8   6   47.00    8.90
  -5   8  -6   55.19    5.40
  -5  -8   6   64.59    8.60
   5  -8  -6   59.89    5.50
  -6  -8  -6   23.00    3.50
   6  -8   6   25.60    3.60
   6  -8   6   27.20    4.20
   6  -8   6   17.00    3.70
  -6  -8   6   27.00    4.50
   6  -8  -6   25.70    4.00
  -6  -8   6   23.40    3.90
   0   9  -6   82.29    9.20
   0   9   6   92.89    9.40
   0  -9  -6   78.99    6.60
   0  -9   6   79.59    7.90
   0  -9   6   78.99    5.50
   1  -9   6  366.76   15.80
  -1   9   6  359.76   17.30
   1   9  -6  372.06   17.30
  -1  -9  -6  373.36   14.20
   1  -9   6  357.16   14.00
   1   9   6  367.16   17.40
  -1  -9   6  361.86   15.00
  -1  -9   6  342.07   23.00
  -1   9  -6  355.46   15.00
  -1  -9   6  366.06   14.20
  -1   9  -6  364.46   17.50
  -1  -9   6  355.96   15.50
  -2  -9  -6   10.40    5.10
  -2  -9  -6   20.70    3.40
   2  -9   6   13.40    4.80
   2  -9   6   10.90    2.80
  -2  -9  -6   17.20    4.70
   2   9  -6   13.50    5.50
  -2  -9   6   15.40    3.00
  -2   9  -6   18.70    5.70
  -2  -9   6   13.60    9.90
  -2   9  -6   13.60    3.90
  -2  -9   6    6.70    4.30
  -2  -9   6   10.90    3.20
  -3  -9  -6  280.87   12.60
   3  -9   6  286.57   13.00
   3   9  -6  286.27   14.70
   3  -9   6  288.37   11.50
  -3  -9  -6  279.27   11.70
  -3  -9  -6  277.47   12.80
  -3  -9   6  290.07   11.80
  -3  -9   6  253.07   19.10
  -3  -9   6  280.47   12.00
  -3  -9   6  280.57   12.90
  -3   9  -6  279.37   12.00
  -3   9  -6  258.97   14.50
  -4  -9  -6   15.30    3.00
  -4  -9  -6   14.80    4.90
   4  -9   6   14.70    2.80
  -4  -9  -6   11.60    5.00
   4  -9   6   12.30    3.90
  -4  -9   6   18.10    3.10
  -4  -9   6   21.90    8.90
   4  -9  -6   16.00    4.00
  -4  -9   6    5.90    8.10
  -4   9  -6   16.00    3.40
   5  -9   6  159.98    7.40
  -5  -9  -6  162.78    8.00
  -5  -9  -6  176.48    7.30
  -5  -9  -6  172.38    8.00
   5  -9   6  173.38    8.40
  -5  -9   6  170.18    7.90
   5  -9  -6  165.88    8.00
  -5  -9   6  177.48   12.10
  -6  -9  -6   -2.70    1.70
   0 -10  -6    3.10    3.60
   0 -10   6    4.80    3.30
   0  10  -6    3.00    4.80
   0  10   6   -2.50    4.50
   0 -10   6    0.10    3.80
  -1 -10  -6   87.79   10.10
   1 -10   6   72.09    5.60
  -1  10   6   78.19    9.80
   1 -10   6   83.99    7.40
  -1 -10  -6   75.89    6.10
   1  10  -6   81.59    8.60
  -1 -10   6   77.09    7.30
   1 -10  -6   84.69    7.30
  -1  10  -6   80.49    8.70
   1  10   6   74.39    8.60
  -1 -10   6   96.09    6.10
  -1 -10   6   80.19    6.60
  -2 -10  -6  115.39    8.90
   2 -10   6   98.29    8.10
   2  10  -6   95.69    9.30
  -2 -10  -6   99.19    7.90
   2 -10   6  100.79    6.20
  -2 -10  -6  103.29    6.50
  -2 -10   6  105.09    7.80
  -2 -10   6  115.29    6.70
  -2  10  -6  107.39    9.30
  -2 -10   6  101.59    6.90
  -2 -10   6  132.49   22.00
   3 -10   6  117.69    6.30
  -3 -10  -6  136.39    8.30
  -3 -10  -6  105.39    7.80
   3 -10   6  119.89    8.20
   3  10  -6  125.09    9.50
  -3 -10  -6  112.69    6.70
  -3 -10   6   87.79   13.00
  -3 -10   6  115.59    6.90
  -3  10  -6  123.39   10.10
   4 -10   6   61.09    6.00
  -4 -10  -6   60.09    4.80
   4 -10   6   51.69    4.40
  -4 -10  -6   64.09    5.50
  -4 -10  -6   63.29    4.80
   4 -10  -6   61.69    8.00
  -4 -10   6   58.69    5.10
  -4 -10   6   51.49    4.70
   5 -10   6   35.00    3.60
  -5 -10  -6   38.90    3.40
  -5 -10   6   36.60    3.90
   0 -11   6   -1.90    2.60
   0 -11  -6    1.60    3.00
   0  11  -6    0.30    3.70
   0 -11   6   -0.10    2.40
   1  11  -6   75.79    8.20
  -1 -11  -6   80.89    8.00
   1 -11   6   75.69    5.30
  -1 -11  -6   71.39    5.70
   1 -11   6   67.89    6.70
  -1 -11   6   71.89    5.40
  -1 -11   6   77.79    6.90
   1 -11  -6   78.99    6.60
  -2 -11  -6  120.89    8.80
  -2 -11  -6  118.29    6.50
   2 -11   6  121.19    8.00
   2 -11   6  124.59    6.50
   2  11  -6  127.39    9.10
  -2 -11  -6  128.99    7.70
   2 -11  -6  110.59    7.90
  -2 -11   6  126.59    6.70
  -2  11  -6  137.29    9.30
  -2 -11   6  124.19    6.60
  -2 -11   6  138.39    7.80
  -3 -11  -6   22.60    3.20
   3 -11   6   26.90    3.80
   3 -11   6   28.00    3.70
  -3 -11  -6   26.60    3.80
  -3 -11  -6   22.90    3.60
  -3 -11   6   26.50    3.60
  -3 -11   6   26.70    4.30
  -3 -11   6   24.30    3.60
   4 -11   6   28.70    3.40
   4 -11   6   22.00    5.40
  -4 -11  -6   29.40    3.10
  -4 -11  -6   33.70    4.90
  -4 -11  -6   19.60    2.90
  -4 -11   6   32.10    3.30
   0 -12   6   12.00    2.50
   0 -12  -6   16.30    4.30
   0 -12  -6   17.10    3.40
   0 -12   6   13.40    2.50
   0 -12   6   15.90    3.20
   0  12  -6   10.30    3.50
   1 -12   6   44.40    4.20
   1 -12   6   35.30    5.30
   1 -12   6   42.90    4.10
   1  12  -6   45.30    5.90
  -1 -12  -6   40.40    5.50
  -1  12  -6   40.10    5.80
   1 -12  -6   39.10    5.50
  -1 -12   6   44.50    4.30
  -1 -12   6   45.70    5.00
  -1 -12   6   45.70    4.20
  -2 -12  -6   24.60    3.60
   2 -12   6   33.30    3.40
  -2 -12  -6   23.60    3.80
   2 -12   6   24.80    3.40
  -2  12  -6   20.90    4.50
  -2 -12   6   23.70    3.10
  -2 -12   6   20.90    3.30
  -2 -12   6   19.10    3.00
  -3 -12  -6  139.39    7.50
   3 -12   6  148.59    6.50
  -3 -12  -6  161.58    8.10
   3 -12   6  162.08    7.40
  -3 -12  -6  145.99    6.60
  -3 -12   6  145.29    6.20
  -3 -12   6  166.08    8.10
   0 -13  -6    5.30    3.10
   0 -13   6    3.50    2.60
   0 -13   6   -2.90    2.20
   0 -13   6    2.70    2.00
   1  13  -6   78.89    5.30
  -1 -13  -6   68.59    4.90
   1 -13   6   64.89    4.40
   1 -13   6   76.49    4.20
  -1 -13   6   74.59    4.10
  -1 -13   6   78.89    4.60
  -1  13  -6   84.89    5.60
   2 -13   6   24.20    2.80
  -2 -13  -6   20.10    2.90
  -2 -13   6   24.00    3.00
   0   0   7    0.20    3.10
   0   0   7    2.10    1.10
   0   0   7    0.30    3.10
   0   0  -7    1.00    2.40
   1   0  -7    4.80    2.70
   1   0  -7   -1.20    2.50
  -1   0  -7    6.20    2.20
  -1   0  -7    2.80    3.70
  -1   0   7    4.20    3.90
  -1   0   7    4.30    1.00
   1   0   7    2.20    4.60
   2   0   7 2608.14   92.39
  -2   0   7 2668.53   84.79
   2   0   7 2729.43   91.09
   2   0  -7 2834.22   89.59
  -2   0  -7 2633.04   91.29
  -2   0   7 2518.15   90.29
   2   0   7 2673.73   86.19
   2   0  -7 2693.93   90.59
  -2   0  -7 2623.84   86.19
  -3   0  -7  950.90   41.80
  -3   0  -7  923.91   31.90
   3   0   7  923.31   32.10
   3   0  -7  921.51   44.50
   3   0   7  932.01   30.50
  -3   0  -7  887.71   30.50
  -3   0   7  912.71   29.80
   3   0   7  902.11   39.80
   4   0   7  350.36   14.80
   4   0   7  350.26   34.00
   4   0  -7  412.76   32.70
  -4   0  -7  367.06   15.40
  -4   0   7  361.86   15.40
  -4   0  -7  360.06   15.30
   4   0   7  377.06   16.20
  -4   0  -7  351.86   13.70
  -4   0  -7  353.36   20.70
   4   0   7  362.86   13.30
  -4   0  -7  341.27   48.10
   4   0  -7  369.66   13.60
  -5   0  -7  102.39    7.90
   5   0   7   86.39    7.20
   5   0  -7   82.09    5.60
   5   0   7   90.19    5.80
  -5   0   7   82.29    7.40
   5   0   7   96.09   10.10
   5   0  -7   84.49    7.30
  -5   0  -7   84.19    8.00
  -5   0  -7   80.59    8.10
   6   0   7    2.70    3.80
  -6   0  -7   -0.10    4.50
   6   0  -7   -0.80    3.40
  -6   0  -7    3.70    5.00
   6   0   7    0.80    3.70
   6   0  -7    0.70    3.00
   6   0   7   -0.10    6.60
  -6   0  -7    0.70    4.30
  -6   0   7   -2.20    3.40
   7   0   7    4.80    2.70
   7   0  -7    2.20    2.10
   7   0  -7    2.60    2.30
   7   0  -7    1.10    2.70
  -7   0  -7    7.80    3.30
  -7   0   7    1.90    2.70
   7   0   7    7.90    3.30
   8   0  -7    9.50    2.00
   8   0   7   11.10    2.10
   0  -1   7   69.89    7.20
   0  -1  -7   76.59    5.10
   0  -1   7   80.39    8.10
   0   1   7   75.49    5.50
   0   1   7   82.49    5.60
   0  -1   7   76.99    3.90
   0   1  -7   71.49    4.60
   0   1  -7   72.69    6.50
   1  -1   7 2092.59   70.99
   1  -1   7 1990.10   66.79
   1   1  -7 2127.49   69.79
  -1  -1  -7 2055.19   69.59
  -1   1   7 2031.30   67.49
   1   1  -7 2096.99   70.09
  -1   1  -7 2079.89   70.49
  -1   1  -7 2030.20   66.89
  -1  -1   7 2095.19   70.49
   1   1   7 2059.99   71.09
   1  -1  -7 2196.08   67.59
   1   1   7 2030.80   69.99
   1   1   7 2022.90   66.39
  -1  -1   7 2015.20   66.49
   1  -1  -7 2122.69   67.89
   2  -1   7  252.37   20.60
   2   1  -7  273.57   15.50
   2  -1   7  235.38   13.00
   2   1  -7  263.37   19.10
  -2  -1  -7  281.07   11.30
  -2  -1  -7  276.87   16.50
  -2   1   7  289.47   15.30
   2   1  -7  270.27   11.70
   2  -1   7  305.47   16.70
   2   1   7  269.47   10.60
  -2   1  -7  302.57   17.20
  -2  -1   7  280.67   10.30
  -2   1  -7  270.77   10.80
   2   1   7  262.97   15.50
   2   1   7  266.67   20.80
   2  -1  -7  269.97   13.30
   2  -1  -7  299.07   15.10
  -3  -1  -7  264.77   22.90
   3  -1   7  265.37   22.20
   3   1  -7  276.17   20.10
   3   1  -7  237.38   37.70
   3  -1   7  282.17   10.50
   3  -1   7  274.57   12.30
   3   1  -7  253.17   13.00
  -3  -1  -7  268.87   10.60
  -3  -1  -7  282.67   12.10
   3   1  -7  273.97   10.60
   3   1   7  265.97   11.70
   3  -1  -7  298.17   25.00
  -3   1  -7  332.27   24.10
   3   1   7  290.77   20.90
  -3  -1   7  291.27   10.70
   3  -1  -7  276.27   17.90
  -3   1  -7  272.77   11.60
   4   1  -7   70.89    4.80
  -4  -1  -7   63.59    7.00
  -4  -1  -7   58.89    6.70
   4   1  -7   57.59    8.20
   4  -1   7   70.89    4.60
  -4  -1  -7   67.99    5.30
   4  -1   7   66.99    8.10
   4  -1   7   52.29    7.10
  -4   1   7   66.59    7.50
   4   1  -7   55.79   18.40
  -4  -1  -7   71.69    7.10
  -4  -1  -7   73.79   24.90
   4  -1   7   55.29   20.30
  -4  -1   7   77.29    7.70
   4   1   7   63.69    6.90
  -4   1  -7   52.39    7.40
   4  -1  -7   68.09    5.10
  -4   1  -7   74.49    8.20
  -4   1  -7   87.59    6.50
   4   1   7   62.99    5.00
  -4  -1   7   74.89    5.10
   4   1   7   72.99    7.30
   4  -1  -7   58.59   16.80
   4   1   7   31.60   21.10
   5  -1   7  421.96   19.80
  -5  -1  -7  409.56   18.00
   5   1  -7  376.46   22.20
  -5  -1  -7  402.16   17.60
  -5   1   7  411.16   16.40
   5  -1   7  416.16   15.20
  -5  -1  -7  405.56   15.70
  -5  -1  -7  422.46   16.80
   5   1  -7  423.26   15.50
   5   1  -7  385.96   16.40
  -5   1  -7  410.26   16.80
   5   1   7  421.66   15.20
  -5   1  -7  410.26   17.00
   5  -1  -7  421.26   15.50
   5  -1  -7  380.26   16.50
   5   1   7  407.56   18.50
  -5   1  -7  402.46   18.10
   6  -1   7  134.19    7.30
  -6  -1  -7  135.69    9.70
   6   1  -7  122.89   21.00
   6  -1   7  137.49   20.30
  -6  -1  -7  146.39   11.30
   6   1  -7  112.59    8.80
   6   1  -7  130.99    8.30
  -6  -1  -7  132.79    8.80
  -6   1   7  132.09    8.20
   6  -1   7  135.69    8.30
   6   1  -7  129.99    7.60
   6  -1  -7  129.69    8.50
  -6   1  -7  126.09    9.10
   6   1   7  135.29    8.20
   6   1   7  133.69   12.20
   6  -1  -7  140.69    8.00
   6  -1  -7  138.59    8.70
  -6  -1   7  136.09    8.80
  -7   1   7   -1.40    2.60
   7   1  -7   -2.00    2.50
   7  -1   7    3.20    2.90
  -7  -1  -7    4.60    3.20
   7  -1   7   -0.20    2.50
   7   1  -7    2.90    2.40
   7   1  -7    2.90    2.10
  -7   1  -7   -1.60    2.90
   7  -1  -7    2.70    2.10
   7   1   7    0.20    2.60
   7   1   7    0.20    3.80
   7  -1  -7   -3.70    2.70
  -7  -1   7   -0.40    2.70
   7  -1  -7   -0.90    2.10
   8   1  -7    6.40    1.80
   8  -1   7    4.20    1.90
  -8  -1  -7    7.10    2.40
  -8   1  -7    7.90    2.10
   8  -1  -7    9.90    2.20
   0   2  -7  628.34   24.60
   0   2  -7  607.24   20.80
   0   2  -7  605.54   24.00
   0   2   7  601.04   20.80
   0  -2   7  588.44   25.30
   0  -2  -7  617.74   21.30
   0   2   7  610.14   20.90
   0  -2   7  615.04   20.90
   0  -2   7  577.84   24.90
   1   2  -7   12.20    4.90
   1   2  -7    9.80    4.60
  -1  -2  -7   11.60    4.10
   1  -2   7   14.70    6.80
   1   2  -7   14.40    2.80
   1  -2   7   16.00    7.00
   1  -2   7   14.90    2.80
  -1   2  -7   12.30    2.30
  -1  -2   7    4.40    7.50
   1   2   7   15.40    1.70
   1  -2  -7   11.80    1.90
   1   2   7   15.60    4.40
   1  -2  -7   17.50    3.00
  -1  -2   7   16.50    2.40
  -1   2  -7   15.80    5.30
   1   2   7   10.10    5.60
   2  -2   7   45.00    6.50
  -2  -2  -7   45.90    8.20
   2   2  -7   55.09    5.40
   2   2  -7   56.99   13.60
   2   2  -7   50.99    8.60
  -2  -2  -7   51.19    5.60
   2  -2   7   69.09   13.30
  -2   2  -7   62.79    9.60
   2  -2  -7   59.19    6.40
   2   2   7   53.49    3.80
   2   2   7   42.50    8.00
   2  -2  -7   48.20    6.40
  -2   2  -7   51.19    4.00
  -2  -2   7   45.00    4.00
   3   2  -7  443.86   25.90
   3  -2   7  450.85   15.90
   3   2  -7  435.76   16.00
  -3  -2  -7  454.05   18.00
  -3  -2  -7  459.15   16.20
  -3  -2  -7  464.95   30.40
   3   2  -7  445.16   18.20
   3  -2   7  439.86   27.80
   3   2   7  450.85   26.90
   3  -2  -7  447.56   22.10
  -3  -2   7  458.45   16.90
  -3   2  -7  440.46   29.70
  -3   2  -7  483.05   17.10
   3   2   7  475.55   17.20
   3  -2  -7  442.76   27.20
  -4  -2  -7  170.58    8.30
  -4  -2  -7  178.08   10.40
   4  -2   7  174.68    9.70
   4  -2   7  171.78    7.50
  -4  -2  -7  164.58    9.80
   4   2  -7  149.88   25.90
   4   2  -7  176.88   12.10
   4  -2   7  177.78   27.50
   4   2  -7  173.08    7.70
   4   2  -7  177.28    9.40
   4  -2   7  163.78   11.40
  -4  -2  -7  153.48    8.90
  -4   2   7  152.88   10.10
  -4  -2  -7  150.68   28.90
   4   2   7  171.88    9.50
   4  -2  -7  178.28   28.30
  -4   2  -7  169.88    9.30
  -4  -2   7  161.98   10.30
  -4  -2   7  181.88    8.80
   4  -2  -7  165.68    8.10
  -4   2  -7  165.48   11.80
   4   2   7  171.58    9.70
  -4   2  -7  167.58    9.90
   4   2   7  114.59   24.30
   5   2  -7  133.19    7.60
   5  -2   7  116.19   12.90
   5   2  -7  123.19    6.70
  -5  -2  -7  114.19    7.40
  -5  -2  -7  115.19   10.30
   5  -2   7  118.49    6.60
  -5  -2  -7  120.19    8.20
   5  -2   7  113.09    8.10
   5   2  -7  140.29   13.40
  -5   2  -7  127.19    8.50
   5  -2  -7  115.49    6.70
   5   2   7  130.39    9.80
   5  -2  -7  126.89    9.40
  -5  -2   7  122.29    8.80
   5   2   7  121.99    9.30
  -5  -2   7  134.69    7.50
  -5   2  -7  132.69    8.30
   5  -2  -7  109.29   10.00
   6   2  -7  213.58    9.50
   6   2  -7  220.08    9.30
  -6  -2  -7  221.98   12.40
   6  -2   7  210.68   10.30
   6   2  -7  188.28   18.30
   6  -2   7  218.88    9.40
  -6  -2  -7  204.88   10.40
   6  -2   7  171.48   17.80
  -6   2   7  207.38    9.90
   6   2  -7  209.68   10.60
  -6  -2   7  190.68   10.80
  -6   2  -7  204.48   11.00
   6   2   7  208.78   10.30
   6   2   7  185.78   18.00
   6  -2  -7  207.18   10.70
   6  -2  -7  204.38    9.90
   6  -2  -7  208.18    9.20
   7  -2   7  148.09    8.20
   7   2  -7  119.69    8.20
   7  -2   7  120.29    6.90
   7   2  -7  134.29    7.10
  -7  -2  -7  129.79    8.20
   7  -2  -7  128.99    7.20
   7   2   7  138.99    7.20
  -7   2  -7  127.69    7.60
  -7  -2   7  135.29    7.40
   7  -2  -7  125.99    6.40
  -8  -2  -7    2.40    2.30
   8  -2   7    2.40    1.60
   8   2  -7    2.20    1.60
   0   3  -7    2.20    1.80
   0  -3   7    1.30    2.30
   0  -3  -7    3.30    2.40
   0  -3   7   14.10    8.00
   0   3   7   -1.20    1.40
   0   3  -7   -0.70    4.80
   0   3  -7    1.70    4.90
   1   3  -7 2159.88   72.49
   1  -3   7 1922.11   72.89
   1  -3   7 2013.50   72.69
   1  -3   7 2024.30   66.89
   1   3  -7 2098.29   71.69
  -1  -3  -7 1989.70   69.69
  -1   3  -7 2121.29   71.99
   1   3   7 2079.49   69.39
  -1   3  -7 2019.50   66.29
  -1  -3   7 2067.79   76.59
  -1  -3   7 2022.30   66.79
   2  -3   7  527.05   20.00
  -2  -3  -7  490.65   29.50
   2   3  -7  514.45   25.50
  -2  -3  -7  507.95   20.10
  -2  -3  -7  505.35   25.70
   2   3  -7  508.65   38.00
   2  -3   7  544.65   33.30
   2   3  -7  522.65   19.50
  -2   3  -7  549.15   18.90
  -2   3  -7  540.95   27.30
   2   3   7  566.74   18.40
   2  -3  -7  564.74   20.20
  -2  -3   7  541.95   19.40
   2   3   7  525.65   25.20
   3   3  -7  144.69    9.10
  -3  -3  -7  136.19    9.40
  -3  -3  -7  180.98   23.80
   3  -3   7  143.29   21.90
   3   3  -7  133.09   22.20
   3  -3   7  141.29    9.80
  -3  -3  -7  140.19    6.70
   3  -3   7  135.09    6.40
   3   3  -7  143.79    6.70
   3   3   7  152.28   23.80
  -3  -3   7  139.69    7.80
   3  -3  -7  154.68   14.10
  -3   3  -7  152.18    7.50
   3   3   7  149.99    7.50
  -4   3   7  495.85   19.90
  -4  -3  -7  447.56   24.00
  -4  -3  -7  527.05   19.70
   4  -3   7  529.05   20.10
  -4  -3  -7  538.55   20.20
  -4  -3  -7  552.04   18.90
   4   3  -7  543.65   19.60
  -4  -3  -7  447.26   54.99
   4   3  -7  540.15   18.90
  -4  -3  -7  522.55   22.20
   4  -3   7  544.95   23.30
   4   3  -7  560.74   22.00
   4  -3   7  524.35   18.70
  -4  -3   7  546.95   20.40
  -4   3  -7  565.34   19.70
   4   3   7  536.15   20.10
   4  -3  -7  505.85   38.10
  -4   3  -7  555.04   20.90
  -4  -3   7  506.95   20.60
  -4  -3   7  515.05   20.70
   4   3   7  551.14   20.40
   4  -3  -7  511.05   18.90
   4   3   7  365.26   54.39
   5  -3   7  189.18   15.50
  -5  -3  -7  167.58    9.50
  -5  -3  -7  176.68    8.80
   5   3  -7  174.78    8.80
   5   3  -7  177.58    8.20
  -5   3   7  163.28    9.30
  -5  -3  -7  174.98    8.60
   5  -3   7  179.38    8.10
  -5  -3  -7  160.68   12.80
   5   3  -7  175.28   13.40
  -5  -3  -7  172.58   12.30
   5  -3   7  186.88    9.50
   5   3   7  163.68    9.60
  -5  -3   7  167.38   10.50
   5  -3  -7  142.99   13.80
  -5   3  -7  162.98    7.90
  -5  -3   7  180.58   12.40
  -5  -3   7  168.98   10.30
   5  -3  -7  170.78    8.20
  -5   3  -7  174.18   10.00
   5   3   7  174.18   10.70
   6   3  -7  205.58   15.90
   6  -3   7  196.88   21.20
   6   3  -7  210.68    9.40
   6   3  -7  215.88    9.50
   6  -3   7  211.78   10.30
  -6   3   7  217.08    9.80
  -6  -3  -7  214.28   12.60
   6   3  -7  208.78   10.40
  -6  -3  -7  214.08   10.40
  -6  -3  -7  204.68   14.00
   6  -3   7  214.48    9.50
   6  -3  -7  218.28   11.50
  -6  -3   7  224.58   11.30
   6   3   7  195.18   12.50
   6  -3  -7  219.58   10.30
   6   3   7  210.58   10.30
   6  -3  -7  215.58    9.40
  -6   3  -7  219.48   11.10
   7  -3   7   53.59    5.70
   7  -3   7   48.10    4.90
  -7  -3  -7   53.09    6.30
  -7  -3  -7   48.30    5.70
   7   3  -7   47.60    4.50
   7  -3   7   52.39    5.00
   7   3   7   44.20    5.30
  -7  -3   7   46.40    5.20
   7  -3  -7   49.70    4.00
  -7   3  -7   43.70    5.00
   7  -3  -7   61.39    5.80
   0   4  -7 1960.80   65.19
   0   4  -7 1991.80   70.99
   0   4  -7 2088.09   71.99
   0  -4   7 1985.50   77.19
   1   4  -7  232.68   17.10
   1  -4   7  232.68   24.90
   1  -4   7  182.78   26.00
   1  -4   7  216.58   10.70
   1   4  -7  251.37   17.80
  -1  -4  -7  223.88   16.30
   1   4  -7  219.18    9.50
  -1   4  -7  225.98    9.10
  -1   4  -7  211.08   17.20
  -1  -4   7  225.08   10.10
   1   4   7  221.38   14.30
   2  -4   7 1101.69   35.70
   2   4  -7 1109.99   37.20
  -2  -4  -7 1008.60   38.20
   2   4  -7  968.60   54.59
  -2  -4  -7 1053.69   44.60
  -2  -4  -7 1074.19   35.90
   2   4  -7 1084.49   46.40
   2  -4   7 1089.39   38.00
   2   4  -7 1110.09   35.90
  -2   4  -7 1051.69   46.40
   2   4   7 1103.79   44.50
  -2  -4   7 1103.69   35.80
   2   4   7 1112.29   35.20
  -2  -4   7 1108.89   37.40
  -2   4  -7 1146.19   36.40
   3  -4   7  503.35   34.80
   3   4  -7  560.54   21.00
  -3  -4  -7  449.86   37.60
   3  -4   7  538.25   22.30
  -3  -4  -7  527.85   22.10
   3  -4   7  546.15   18.80
   3   4  -7  514.85   37.30
  -3  -4  -7  534.15   19.00
   3   4  -7  534.15   18.80
  -3  -4   7  530.15   19.00
  -3   4  -7  591.34   19.50
   3   4   7  564.34   19.40
   3   4   7  484.05   40.00
  -3  -4   7  550.24   20.80
  -4  -4  -7  259.67   10.70
   4   4  -7  279.47   13.60
  -4  -4  -7  264.67   15.00
   4  -4   7  234.98   18.40
   4   4  -7  251.17   11.30
   4   4  -7  254.37   10.50
   4  -4   7  251.47   11.90
  -4  -4  -7  256.37   12.20
  -4  -4  -7  273.57   11.60
   4  -4   7  274.47   10.50
  -4  -4   7  247.58   12.50
  -4   4  -7  258.57   10.40
  -4  -4   7  249.28   12.80
  -4   4  -7  255.37   12.00
  -4  -4   7  234.58   12.40
   4   4   7  276.77   13.00
   4   4   7  261.67   11.70
   5  -4   7   13.70    3.90
   5   4  -7   18.00    5.90
  -5  -4  -7   19.80    4.60
   5  -4   7   27.70   11.10
   5   4  -7   17.80    3.20
  -5  -4  -7   13.70    7.30
   5   4  -7   23.00    3.50
  -5  -4  -7   20.50    3.60
   5  -4   7   21.30    3.20
  -5  -4  -7   24.10    6.80
   5   4   7   20.50    4.80
  -5  -4   7   21.40    5.00
   5   4   7   25.00    4.60
  -5   4  -7   14.40    4.10
  -5  -4   7   24.80    5.10
   5  -4  -7   20.60    3.20
  -5  -4   7   13.30    4.80
  -6  -4  -7  106.39   13.00
   6  -4   7  126.79    7.70
  -6  -4  -7  130.89    7.80
   6   4  -7  132.69    6.40
   6  -4   7  158.68   25.30
   6   4  -7  102.29   13.50
   6  -4   7  111.89    7.20
   6   4  -7  124.19    8.30
  -6  -4  -7  126.89   11.20
   6   4  -7  125.99    7.50
   6  -4  -7  109.19    7.90
   6  -4  -7  107.69    9.70
   6   4   7  120.89    9.60
  -6   4  -7  121.19    7.90
   6  -4  -7  114.89    6.60
   6   4   7  107.19   10.30
  -6  -4   7  121.39    8.30
  -7  -4  -7   64.79    5.20
   7  -4   7   59.39    5.10
   7  -4   7   58.09    4.60
  -7  -4  -7   60.79    6.90
   7   4  -7   60.29    4.60
  -7   4  -7   62.69    4.90
   7  -4  -7   58.69    4.30
  -7  -4   7   61.19    5.20
   7  -4  -7   54.69    6.40
   0  -5   7   87.69    7.50
   0  -5   7   97.39    5.10
   0   5  -7  126.19   18.00
   0   5  -7   94.49    5.50
   1  -5   7  246.58    9.70
   1   5  -7  249.97   10.60
   1   5  -7  278.07   23.80
   1  -5   7  233.18   12.40
   1   5  -7  244.48   19.60
  -1  -5   7  242.88    9.70
  -1   5  -7  282.57   23.90
  -1  -5   7  255.87   12.00
  -1   5  -7  256.17   10.00
   2   5  -7   29.70   15.40
   2  -5   7   30.70    6.70
   2   5  -7   30.00    4.80
   2   5  -7   27.30   16.60
   2  -5   7   26.40    3.40
  -2  -5  -7   29.70    3.50
   2   5  -7   35.50    4.90
  -2  -5   7   26.40    4.60
  -2   5  -7   33.30    3.70
  -2  -5   7   34.00    3.90
   3   5  -7   34.40    4.60
  -3  -5  -7   19.10    2.90
   3  -5   7   25.00    4.90
   3   5  -7   12.20    6.60
   3   5  -7   27.10    3.90
  -3  -5  -7   25.90    4.90
  -3  -5  -7   20.10    5.20
   3   5  -7   -2.10   22.40
   3  -5   7   29.40    8.40
  -3  -5  -7   27.90    7.90
   3  -5   7   23.50    3.50
  -3   5  -7   19.00    2.70
  -3  -5   7   15.80    5.10
  -3  -5   7   30.60    4.70
  -3  -5   7   19.00    4.10
   3   5   7   22.00    3.50
  -3  -5   7   25.40    4.70
  -3   5  -7   21.60    4.80
  -3  -5   7   27.60    6.90
   4  -5   7   15.60    3.00
  -4  -5  -7   18.50    3.10
  -4  -5  -7   21.20    4.50
   4   5  -7   21.00    3.50
  -4  -5  -7   18.00    4.00
   4   5  -7   21.20    3.50
   4   5  -7   11.60    4.70
   4  -5   7   17.00    4.40
  -4  -5  -7   23.20    7.90
  -4   5  -7   13.20    3.90
  -4  -5   7   20.10    4.00
  -4  -5   7   21.40    5.90
  -4  -5   7   17.20    5.00
  -4  -5   7   13.80    4.20
   4   5   7   16.30    3.60
  -5  -5  -7   11.50    3.10
  -5  -5  -7   11.40    3.90
   5   5  -7   17.20    5.90
  -5  -5  -7   21.20    8.00
   5   5  -7   13.60    2.80
   5  -5   7   10.40    3.80
  -5  -5  -7   11.10    3.00
  -5  -5  -7   -4.70    8.70
   5  -5   7   15.90    2.80
  -5  -5   7   16.00    5.30
   5  -5  -7    9.80    3.00
  -5  -5   7   17.90    4.90
   5   5   7   22.10    4.50
  -5   5  -7   15.60    4.10
  -5  -5   7   10.40    5.30
  -6  -5  -7   15.40    6.10
  -6  -5  -7   23.90    3.60
   6  -5   7   23.70    4.20
   6   5  -7   22.60    7.60
  -6  -5  -7    9.00    4.50
   6  -5   7   19.60    2.90
  -6  -5  -7    9.50    8.20
  -6   5  -7   27.50    5.80
  -6  -5   7   38.10    7.20
   6  -5  -7   17.40    3.00
  -7  -5  -7   31.10    4.80
   7  -5   7   21.70    3.50
   7   5  -7   36.80    3.50
   7  -5   7   27.50    3.70
  -7  -5  -7   44.70    6.60
   7  -5   7   30.60    3.80
   7  -5  -7   23.90    3.50
  -7  -5   7   29.30    4.20
   0   6  -7  102.69    5.80
   0  -6   7   96.19    5.20
   0  -6   7  103.59    9.10
   1   6  -7  159.18    8.10
   1   6  -7  142.89   23.30
   1  -6   7  152.68    7.10
   1  -6   7  153.58   11.50
  -1  -6   7  162.88   10.40
  -1   6  -7  167.58    7.20
  -1  -6   7  156.48    7.20
   2  -6   7   73.59    9.90
   2   6  -7   75.39    9.40
   2   6  -7   60.19   22.70
  -2  -6  -7   64.69    5.20
   2   6  -7   66.69    6.00
   2  -6   7   73.79    8.50
  -2   6  -7   89.39   10.50
  -2  -6   7   71.69    7.10
  -2   6  -7   66.89    4.00
  -2   6  -7   66.09    7.40
  -2  -6   7   72.39    8.40
  -2  -6   7   71.49    7.70
   2   6   7   54.49    8.40
   3  -6   7  174.38   10.30
  -3  -6  -7  184.98    8.50
   3  -6   7  185.28   11.10
   3   6  -7  170.18   14.60
  -3  -6  -7  187.58   10.90
   3  -6   7  178.08    8.00
  -3  -6  -7  174.78   10.70
   3   6  -7  162.18    9.20
   3   6  -7  193.88   10.30
  -3  -6   7  187.28   12.30
  -3  -6   7  166.08   11.40
  -3   6  -7  195.48   14.00
  -3  -6   7  186.78   10.10
  -3   6  -7  187.28    9.80
  -3  -6   7  175.58    8.40
  -3  -6   7  193.58    9.40
   4   6  -7  118.49    7.20
   4   6  -7  121.29    9.60
  -4  -6  -7  126.69    8.50
   4  -6   7  124.79    8.40
  -4  -6  -7  129.89    7.10
  -4  -6  -7  112.49    7.90
  -4  -6  -7   99.49   15.40
   4  -6   7  124.69    6.50
  -4  -6   7  121.79   10.60
  -4  -6   7  119.49    7.70
  -4  -6   7  116.89    8.40
  -4  -6   7  128.59    9.70
  -4   6  -7  119.39    8.20
  -5  -6  -7   44.60   10.20
  -5  -6  -7   41.70    5.20
   5   6  -7   26.10    6.00
  -5  -6  -7   47.10    5.80
  -5  -6  -7   39.90    5.30
   5  -6   7   36.10    4.90
   5  -6   7   43.10    4.50
   5  -6   7   44.70    6.30
   5  -6  -7   44.40    5.20
  -5   6  -7   42.80    5.80
  -5  -6   7   34.40    6.80
  -5  -6   7   31.80    4.40
  -5  -6   7   56.09    8.00
   6   6  -7   53.69    5.30
   6  -6   7   51.99    5.80
   6  -6   7   59.19    5.40
   6  -6   7   55.79    4.70
  -6  -6  -7   55.79    5.30
  -6  -6  -7   55.59    5.20
  -6  -6   7   67.79    6.70
   6  -6  -7   59.39    4.80
  -6   6  -7   59.99    5.50
  -6  -6   7   57.29    6.20
  -7  -6  -7  105.49    5.50
   7   6  -7  108.49    6.40
   7  -6   7  119.59    6.00
   7  -6   7  109.29    5.40
  -7  -6   7  106.29    5.90
   0  -7   7   83.39   11.20
   0  -7   7   65.59    4.50
   0  -7   7   59.49    7.80
   0   7   7   67.19    8.20
   0   7  -7   48.90    8.60
   0   7  -7   63.59    4.80
   0   7  -7   60.09    7.20
   1   7  -7   48.90    4.80
   1  -7   7   42.10    5.60
   1   7  -7   48.60    8.90
   1  -7   7   48.00    4.10
   1   7  -7   45.40    7.10
   1  -7   7   48.50    9.40
  -1  -7  -7   34.80    5.60
  -1   7   7   39.80    8.50
  -1  -7   7   35.50    4.10
  -1  -7   7   49.60    7.50
  -1  -7   7   51.39    7.80
  -1   7  -7   56.59    8.80
   1   7   7   45.10    8.60
  -1  -7   7   42.80    6.50
  -1   7  -7   57.29    6.90
   2   7  -7  361.36   17.60
   2  -7   7  347.17   15.90
  -2  -7  -7  380.86   14.20
   2  -7   7  384.16   13.90
  -2  -7  -7  310.77   16.80
   2   7  -7  370.36   15.00
  -2  -7   7  394.86   18.10
  -2  -7   7  371.66   15.70
  -2  -7   7  373.86   14.10
   2   7   7  366.36   17.20
  -2  -7   7  372.16   14.90
  -2   7  -7  368.36   17.70
  -2   7  -7  376.86   15.50
   3   7  -7   23.10    4.40
   3  -7   7   29.10    6.20
   3  -7   7   28.50    4.00
  -3  -7  -7   22.40    6.80
  -3  -7  -7   29.40    4.40
  -3  -7   7   23.50    3.90
  -3  -7   7   31.50    6.70
  -3  -7   7   32.70    9.40
  -3  -7   7   21.90    4.40
  -3   7  -7   34.80    4.80
  -3  -7   7   31.80    4.80
   4  -7   7   16.80    4.10
  -4  -7  -7   19.90   12.30
  -4  -7  -7   16.40    3.10
   4   7  -7   23.00    5.10
   4  -7   7   13.20    4.60
  -4  -7  -7   15.50    4.00
  -4  -7  -7   20.80    3.90
  -4  -7   7   15.00    3.40
  -4  -7   7   21.40    6.80
  -4   7  -7   16.80    4.20
  -4  -7   7   11.70    3.90
  -4  -7   7   11.80    6.20
   5   7  -7   74.59    8.70
   5  -7   7   68.49    6.20
  -5  -7  -7   52.29    5.20
   5  -7   7   71.79    5.10
   5   7  -7   57.59    7.20
  -5  -7  -7   60.49    5.60
   5  -7   7   76.29    7.80
  -5  -7  -7   58.29   11.70
   5  -7  -7   53.39    5.70
  -5   7  -7   63.59    5.90
  -5  -7   7   53.09    8.50
  -5  -7   7   57.69    6.20
  -5  -7   7   52.59    7.80
   6   7  -7    9.40    2.80
   6  -7   7    9.80    2.70
   6  -7   7    5.20    2.90
  -6  -7  -7    5.70    2.30
  -6  -7   7   10.30    3.50
  -6  -7   7    9.80    3.50
   6  -7  -7   12.90    2.70
   0  -8   7    7.60    4.10
   0  -8   7    6.00   13.40
   0  -8   7   -1.60    2.20
   0   8  -7   -0.10    3.60
   0   8   7   -0.60    5.20
   0   8  -7    2.00    5.00
   1  -8   7  244.48   12.40
   1   8  -7  258.67   10.00
  -1  -8  -7  260.27   10.90
   1   8  -7  247.98   14.10
  -1   8   7  249.97   15.10
   1  -8   7  252.17   10.40
  -1   8  -7  256.87   14.10
  -1  -8   7  245.18   11.50
   1   8   7  247.18   14.00
  -1  -8   7  246.48   12.30
  -1  -8   7  256.97   10.60
  -1   8  -7  243.88   11.90
  -1  -8   7  257.87   17.00
   2   8  -7   62.59    9.30
  -2  -8  -7   55.29   11.30
   2  -8   7   60.09    4.90
   2  -8   7   58.29    7.30
  -2  -8  -7   58.19   11.10
   2   8  -7   64.69    6.10
  -2  -8  -7   63.59    5.50
  -2   8  -7   62.39    6.80
  -2  -8   7   56.49    6.20
  -2  -8   7   52.29    8.50
  -2  -8   7   63.49    7.20
  -2  -8   7   62.79    5.10
  -2   8  -7   61.49    9.10
  -3  -8  -7   13.80    3.30
  -3  -8  -7   15.20    4.40
  -3  -8  -7   15.20    3.90
   3  -8   7   16.30    3.00
   3   8  -7   11.30    4.00
   3  -8   7    9.80    4.10
   3   8  -7   19.70    5.90
  -3  -8   7   17.00    3.20
  -3   8  -7   12.10    3.90
  -3  -8   7   17.50    7.30
  -3  -8   7   14.40    3.90
  -3  -8   7   18.30    3.50
  -3  -8   7   21.90    8.70
  -3   8  -7   15.80    6.00
  -4  -8  -7  100.69    7.30
  -4  -8  -7  111.49    6.60
   4  -8   7   99.99    9.10
   4  -8   7  117.89    8.10
   4   8  -7   88.69    8.80
   4  -8   7  110.59    6.30
  -4  -8  -7  113.09    7.70
  -4  -8   7   99.39   12.70
  -4  -8   7  102.89    7.50
  -4  -8   7   99.79   11.00
  -4  -8   7   97.59    6.70
  -4   8  -7  121.39    7.50
   5  -8   7   15.70    4.10
  -5  -8  -7   16.10    3.10
   5  -8   7   17.60    3.30
   5  -8   7   11.70    2.60
  -5  -8  -7   15.90    2.80
   5   8  -7   17.30    3.70
  -5  -8  -7   12.10    3.20
   5  -8  -7   15.90    3.40
  -5  -8   7   20.70    3.60
  -5   8  -7   17.00    3.20
  -5  -8   7   15.40    5.20
   6  -8   7   13.20    2.60
  -6  -8  -7   12.90    2.40
   6  -8   7   11.90    2.40
   6  -8   7    8.60    3.40
  -6  -8   7    8.30    3.30
   0   9  -7   99.19    9.80
   0   9   7  107.59   10.10
   0   9  -7   95.59    7.80
   0  -9   7  109.59    6.30
   0  -9   7  101.79    8.10
   0  -9  -7  117.99    7.60
   1  -9   7  414.86   15.20
  -1  -9  -7  408.66   15.40
   1  -9   7  405.56   16.70
  -1   9   7  390.46   18.80
   1   9  -7  411.26   18.60
  -1  -9   7  394.06   15.30
  -1  -9   7  397.96   24.50
  -1  -9   7  384.86   15.90
  -1  -9   7  390.06   16.60
  -1   9  -7  395.66   18.20
  -1   9  -7  388.76   16.10
   1   9   7  391.86   18.40
   2  -9   7  139.19    7.10
  -2  -9  -7  143.19    7.60
  -2  -9  -7  146.49   10.00
   2  -9   7  130.29    9.00
   2   9  -7  123.19   10.80
  -2  -9  -7  118.19   10.70
  -2  -9   7  141.69   17.20
  -2   9  -7  138.89    8.50
  -2  -9   7  133.89    8.10
  -2   9  -7  134.69   10.60
  -2  -9   7  136.79    7.30
  -2  -9   7  138.09    8.90
  -3  -9  -7   74.29    7.40
   3   9  -7   68.89    9.50
  -3  -9  -7   76.59    5.70
  -3  -9  -7   87.19    7.00
   3  -9   7   83.79    5.60
   3  -9   7   69.09    7.30
  -3   9  -7   85.89    6.70
  -3  -9   7   75.59    6.30
  -3   9  -7   67.49    9.30
  -3  -9   7   50.69    9.50
  -3  -9   7   73.49    6.90
  -3  -9   7   81.69    6.10
  -4  -9  -7   19.10    3.70
   4  -9   7   20.10    3.90
   4  -9   7   23.20    3.10
  -4  -9  -7   18.30    3.00
  -4  -9  -7   25.20    3.90
  -4  -9   7   20.30    5.10
  -4  -9   7   20.00    3.10
  -4  -9   7   16.70    7.00
  -4  -9   7   27.80    9.10
  -4   9  -7   15.40    3.40
  -5  -9  -7   17.80    2.90
   5  -9   7   23.60    4.10
   5  -9   7   23.90    3.40
  -5  -9  -7   31.30    4.80
  -5  -9  -7   25.00    3.50
  -5  -9   7   24.60    3.10
   5  -9  -7   29.70    3.90
  -5  -9   7   25.40    6.10
  -6  -9  -7  119.59    5.30
   0  10   7   10.10    4.70
   0 -10   7    5.70    2.70
   0 -10   7   11.00    3.90
   0 -10   7    7.60    3.30
   0  10  -7   18.60    5.30
   0 -10  -7   15.80    3.60
   1  10  -7   24.90    5.10
   1 -10   7   24.70    4.30
   1 -10   7   31.20    4.30
  -1 -10  -7   29.60    3.80
  -1 -10   7   20.00    3.40
  -1  10  -7   28.50    5.70
  -1 -10   7   33.90    4.80
  -1 -10   7   28.00    4.70
  -2 -10  -7  113.69    6.90
   2 -10   7  124.99    8.50
  -2 -10  -7  134.89    8.70
   2  10  -7  119.59    9.60
   2 -10   7  127.49    6.80
  -2 -10  -7  120.59    9.40
  -2 -10   7  117.59    7.30
  -2 -10   7  131.69    8.20
  -2 -10   7  116.69   15.80
  -2 -10   7  122.89    7.10
  -2  10  -7  126.09    9.80
  -2  10  -7  132.29    7.60
  -3 -10  -7   64.09    6.60
   3 -10   7   56.49    6.60
  -3 -10  -7   57.99    5.00
   3 -10   7   61.09    4.70
   3  10  -7   64.99    8.20
  -3 -10  -7   66.29    6.00
  -3 -10   7   78.49    9.10
  -3  10  -7   76.39    8.60
  -3 -10   7   62.19    5.30
  -3 -10   7   59.89    5.80
  -3 -10   7   66.89   13.20
  -4 -10  -7   14.90    2.60
  -4 -10  -7   17.70    3.10
  -4 -10  -7   14.20    2.60
   4 -10   7   17.10    2.60
   4 -10   7   18.30    3.40
  -4 -10   7   14.80    2.90
  -4 -10   7   12.30    3.00
   5 -10   7  191.78    9.50
  -5 -10  -7  178.88    7.00
  -5 -10  -7  172.48    7.30
  -5 -10   7  169.58    7.20
   0 -11  -7    1.50    3.00
   0 -11   7   -0.10    2.40
   0 -11   7    3.10    2.70
   0  11  -7    2.10    3.90
  -1 -11  -7   65.19    5.60
   1 -11   7   74.29    6.50
   1 -11   7   64.69    5.70
   1 -11   7   57.09    4.90
  -1 -11  -7   70.39    8.20
   1 -11  -7   68.29    6.70
  -1  11  -7   58.79   10.10
  -1 -11   7   72.19    6.50
  -1 -11   7   70.99    5.10
  -2 -11  -7  126.19    7.40
  -2 -11  -7  118.49    6.50
   2 -11   7  123.19    7.40
   2 -11   7  108.09    6.20
  -2 -11  -7  115.69    8.80
   2  11  -7  126.99    9.00
  -2 -11   7  127.09    7.50
  -2 -11   7  113.89    6.30
  -2 -11   7  116.19    6.50
  -2  11  -7  126.09    9.00
  -3 -11  -7  187.48    8.10
  -3 -11  -7  177.98    8.80
  -3 -11  -7  190.38    8.30
   3 -11   7  186.08    8.80
   3 -11   7  173.98    7.80
  -3 -11   7  165.48    9.70
  -3 -11   7  189.58    8.60
  -3 -11   7  191.48    7.80
   4 -11   7   51.19    3.80
  -4 -11  -7   55.99    3.70
  -4 -11  -7   50.49    4.20
   4 -11   7   51.39    5.70
  -4 -11  -7   49.60    4.30
  -4 -11   7   55.99    3.90
   0  12  -7    2.80    3.10
   0 -12   7   -0.30    2.10
   0 -12   7    0.10    2.10
   0 -12  -7    5.60    4.60
   0 -12   7   -4.40    2.60
   0 -12  -7   -0.10    2.80
   1 -12   7   14.10    2.50
  -1 -12  -7   10.10    2.60
  -1 -12  -7   15.70    3.40
   1 -12   7   12.50    3.20
   1 -12   7   10.90    2.40
   1  12  -7   10.90    3.50
  -1 -12   7   11.10    2.80
  -1  12  -7    8.00    3.40
   1 -12  -7   11.70    3.60
  -1 -12   7   12.80    2.30
  -2 -12  -7   39.20    3.90
  -2 -12  -7   33.20    4.10
   2 -12   7   37.80    3.50
   2  12  -7   41.70    5.20
   2 -12   7   37.80    6.40
   2 -12   7   31.30    3.70
  -2 -12   7   29.60    4.80
  -2  12  -7   34.00    6.50
  -2 -12   7   33.70    3.90
  -2 -12   7   38.30    3.50
  -3 -12  -7  121.59    5.80
  -3 -12  -7  120.49    5.50
   3 -12   7  113.99    5.30
   3 -12   7  122.09    5.60
   0 -13   7   12.30    2.60
   0  13  -7    9.80    2.70
   0 -13   7   10.50    2.60
  -1 -13  -7   23.70    3.80
   1  13  -7   25.50    4.00
   1 -13   7   28.20    3.00
  -1  13  -7   32.30    4.60
  -1 -13   7   23.80    2.60
  -1 -13   7   29.40    3.70
  -2 -13  -7   -4.50    2.00
   2 -13   7   -0.10    1.50
  -2 -13   7    2.10    1.90
   0   0  -8   41.90    5.40
   0   0   8   43.50    2.60
   0   0   8   42.70    6.70
   0   0   8   41.10    5.40
   1   0   8  970.10   38.00
  -1   0  -8 1025.20   34.20
   1   0  -8 1011.80   36.40
   1   0  -8 1094.89   36.30
  -1   0   8 1058.59   32.90
  -1   0  -8 1055.69   37.60
  -1   0   8  970.20   36.50
  -2   0  -8   -5.50    6.00
  -2   0   8    1.30    1.10
   2   0   8  -10.00   11.60
  -2   0   8    0.80    0.80
   2   0   8    0.00    2.00
   2   0   8    3.30    6.40
   2   0  -8   -7.40    4.30
  -2   0  -8    0.80    2.30
   2   0  -8   -2.30    7.00
   3   0   8  171.88    8.80
   3   0   8  174.58   27.70
   3   0  -8  167.38   16.10
  -3   0  -8  172.18    7.60
   3   0   8  170.38    7.50
  -3   0  -8  160.18   20.30
  -3   0  -8  178.58    8.90
  -4   0  -8  694.43   24.90
   4   0   8  702.83   25.30
   4   0  -8  625.54   40.80
   4   0  -8  657.93   22.80
  -4   0  -8  647.74   23.80
   4   0   8  663.13   23.90
  -4   0  -8  652.63   23.30
  -4   0  -8  638.54   22.70
  -4   0  -8  638.54   25.20
   4   0   8  570.04   43.30
   4   0   8  662.53   22.50
  -4   0   8  654.33   24.10
  -5   0  -8   51.49    7.40
   5   0   8   47.20    7.20
   5   0  -8   43.30    4.70
   5   0  -8   60.29    6.80
  -5   0  -8   47.90    9.00
   5   0   8   52.59    5.00
  -6   0   8 1200.58   41.20
   6   0  -8 1181.18   41.10
   6   0  -8 1266.17   40.90
  -6   0  -8 1155.08   41.00
   6   0   8 1218.68   41.20
  -6   0  -8 1200.58   42.10
   6   0  -8 1184.58   40.30
  -7   0   8    6.40    2.80
   7   0  -8    5.90    2.30
   7   0   8    3.30    2.60
  -7   0  -8    4.80    3.00
   7   0   8    8.10    3.40
   7   0  -8    3.70    2.30
   7   0  -8    5.40    2.90
   8   0  -8   35.60    3.40
  -8   0  -8   40.20    3.60
   0   1   8   35.00    5.30
   0  -1   8   47.10    8.00
   0   1  -8   27.10    4.60
   0   1  -8   28.30    3.80
   0  -1  -8   27.90    4.30
   0  -1   8   35.90    6.00
   0  -1   8   27.40    2.70
   0   1   8   31.50    4.30
   1   1  -8  484.55   19.10
   1  -1   8  551.24   24.50
   1  -1   8  502.45   23.70
  -1  -1  -8  553.14   22.00
   1  -1   8  545.55   18.90
   1   1  -8  545.65   22.00
   1   1  -8  568.84   22.50
  -1   1   8  533.75   20.10
  -1  -1   8  559.84   18.50
   1  -1  -8  573.44   19.90
  -1   1  -8  538.55   19.00
   1  -1  -8  553.54   20.20
   1   1   8  558.34   18.30
   1   1   8  565.14   22.00
  -1  -1   8  522.25   22.90
  -1   1  -8  540.75   23.10
   1   1   8  547.75   23.20
   2  -1   8  601.34   32.30
   2   1  -8  609.64   26.00
  -2  -1  -8  611.44   22.10
  -2   1   8  619.44   25.70
   2  -1   8  621.44   22.00
   2   1  -8  618.84   30.00
  -2  -1  -8  595.34   27.30
   2   1  -8  610.44   22.60
   2  -1   8  626.04   27.70
   2   1   8  634.94   27.70
  -2  -1   8  621.14   21.10
  -2   1  -8  602.74   21.80
   2  -1  -8  666.33   26.00
   2   1   8  620.94   21.60
  -2   1  -8  637.94   28.00
   2  -1  -8  642.34   24.20
   3  -1   8  140.39    8.40
   3  -1   8  135.69    6.30
   3   1  -8  126.59   11.00
  -3  -1  -8  141.19    8.30
   3   1  -8  140.99    6.70
   3  -1   8  116.29   17.60
  -3  -1  -8  134.99   20.70
  -3  -1  -8  137.09    6.60
   3   1  -8  128.29   16.80
  -3   1  -8  176.28   22.60
  -3  -1   8  149.88    6.50
  -3   1  -8  145.59    7.80
   3   1   8  137.99   19.70
   3   1   8  132.09    7.50
  -3   1  -8  133.69    6.90
  -4  -1  -8   82.79   27.30
  -4  -1  -8  134.79   12.50
   4  -1   8  109.29   25.10
   4  -1   8  121.19    7.90
  -4  -1  -8  132.09    8.30
   4   1  -8   80.59   20.20
  -4  -1  -8  109.79    6.30
   4  -1   8  104.39    6.00
   4   1  -8  130.39   13.00
   4  -1   8  113.99    9.30
   4   1  -8  113.59    9.00
  -4   1   8  105.69    8.40
  -4  -1  -8  119.59    7.80
  -4  -1  -8  117.99    8.60
   4   1   8  111.19    6.40
   4   1   8  123.19   24.60
  -4  -1   8  107.29    8.50
  -4   1  -8  123.29    9.30
   4  -1  -8  115.59    6.30
   4   1   8  111.29    8.40
   4   1   8  111.89    8.20
  -4   1  -8   96.89    9.00
  -4  -1   8  112.89    5.80
   4  -1  -8   92.19   19.60
  -4   1  -8  118.09    7.90
   5  -1   8   79.39    7.50
   5   1  -8   86.59    5.70
  -5  -1  -8   87.59    8.90
  -5  -1  -8   78.69    6.80
   5  -1   8  100.59   10.50
   5  -1   8   81.89    5.60
  -5  -1  -8   83.19   11.40
   5   1  -8   64.89   11.40
  -5   1  -8   90.89   11.80
   5  -1  -8   91.79    8.10
   5   1   8   95.89    9.30
  -5  -1   8   96.99   10.30
   5  -1  -8   86.79    5.80
  -5   1  -8   68.89   11.20
  -5   1  -8   92.99    7.90
   5   1   8   98.69   11.60
  -6  -1  -8   78.19    7.40
   6   1  -8   72.19    5.50
  -6   1   8   78.69    6.60
   6  -1   8   71.59    6.50
   6   1  -8   81.49    6.00
   6  -1   8   86.89    6.30
   6  -1   8   77.59   12.40
  -6  -1  -8   92.49    8.60
   6   1  -8   81.09    6.90
  -6   1  -8   84.79    9.30
  -6  -1   8   68.09    6.90
   6   1   8   81.59    6.70
   6  -1  -8   79.19    7.20
   6   1   8   70.89   12.30
   6  -1  -8   79.39    5.60
  -6   1  -8   74.69    7.80
   6  -1  -8   62.99    6.30
  -7   1   8   12.70    2.90
   7   1  -8   13.20    2.60
   7   1  -8    9.70    2.80
  -7  -1  -8    8.10    3.40
   7  -1   8   13.30    3.30
   7   1  -8   11.10    2.30
   7  -1   8   11.90    2.90
   7  -1  -8   15.10    2.50
   7   1   8   13.10    4.20
  -7  -1   8   14.90    3.00
   7  -1  -8   11.30    2.40
   7   1   8   10.80    3.00
   7  -1  -8    7.90    3.00
  -7   1  -8   15.10    3.50
   8  -1   8   30.10    3.10
  -8  -1  -8   24.80    3.80
   8   1  -8   29.40    3.10
  -8   1  -8   33.10    3.40
   0   2   8  285.27   11.20
   0   2   8  279.77   11.20
   0  -2  -8  274.17   11.40
   0  -2   8  282.87   10.70
   0  -2   8  277.47   17.20
   0   2  -8  280.67   10.90
   0  -2   8  268.77   17.40
   0   2  -8  292.87   15.00
  -1  -2  -8  445.16   19.20
   1   2  -8  449.46   20.70
   1  -2   8  445.26   16.30
   1   2  -8  459.25   20.10
   1  -2   8  389.66   22.10
   1   2  -8  445.06   16.30
   1  -2   8  457.85   23.20
  -1  -2   8  447.96   16.00
  -1  -2   8  399.96   22.20
   1  -2  -8  463.85   15.80
  -1   2  -8  477.85   21.40
  -1   2  -8  444.96   16.00
   1   2   8  453.55   19.10
   1   2   8  470.05   14.70
   1   2   8  438.66   20.50
  -2  -2  -8  452.55   23.30
   2  -2   8  479.85   30.40
  -2  -2  -8  440.46   17.80
   2  -2   8  470.75   17.70
   2   2  -8  460.85   22.50
   2   2  -8  458.05   17.80
  -2   2  -8  472.15   17.20
   2  -2  -8  500.45   19.90
  -2   2  -8  486.05   24.50
  -2  -2   8  477.55   17.00
   2   2   8  464.45   22.70
   2   2   8  465.15   16.70
   2  -2  -8  511.15   18.40
   3   2  -8  232.08    9.50
   3  -2   8  201.38   22.90
   3   2  -8  215.28   19.90
  -3  -2  -8  258.47   16.30
   3   2  -8  237.48   12.00
   3  -2   8  245.48    9.30
  -3  -2  -8  222.88   22.80
  -3  -2  -8  239.78    9.50
  -3   2  -8  228.08   10.50
  -3  -2   8  250.17   10.20
   3  -2  -8  242.98   17.00
   3   2   8  250.87   10.60
  -3   2  -8  235.18   26.60
   3   2   8  204.58   23.90
  -4  -2  -8   -2.90    7.50
  -4  -2  -8   13.00    4.50
   4  -2   8    4.70    2.20
  -4  -2  -8    5.60    2.60
   4  -2   8    6.60    3.80
   4  -2   8   10.20    5.20
  -4   2   8    7.10    4.60
   4   2  -8   15.80    6.30
   4   2  -8    4.40    2.20
  -4  -2  -8   -9.10   25.70
  -4  -2  -8    9.00    3.30
   4   2  -8    6.40    3.70
  -4  -2  -8    9.10    4.90
  -4   2  -8   -0.90    4.70
   4  -2  -8   -3.30   18.30
  -4  -2   8   11.40    4.30
   4   2   8   -4.20    4.30
   4   2   8   42.10   23.20
   4   2   8    9.20    3.60
  -4   2  -8    8.00    5.20
   4  -2  -8   -2.00    2.90
  -4   2  -8    8.40    3.30
  -4  -2   8    8.30    3.40
   5   2  -8   38.20    4.60
  -5   2   8   34.20    5.60
   5  -2   8   31.70    7.30
   5  -2   8   33.40    4.70
   5  -2   8   42.10    4.50
   5   2  -8   38.60    9.10
  -5  -2  -8   36.80    5.10
   5   2  -8   38.30    5.80
  -5  -2  -8   45.90    5.70
  -5  -2  -8   38.70    5.80
  -5  -2  -8   41.70    7.70
  -5  -2  -8   43.50    7.20
   5   2   8   55.79    6.40
   5  -2  -8   36.00    4.50
   5  -2  -8   43.90    9.40
  -5  -2   8   31.80    5.10
   5   2   8   31.00    5.60
  -5   2  -8   34.50    5.10
   5  -2  -8   35.30    9.70
  -5   2  -8   28.20    4.90
   6   2  -8  344.87   13.70
  -6  -2  -8  335.57   17.30
   6  -2   8  317.97   21.10
   6   2  -8  341.57   13.40
   6  -2   8  357.46   13.40
   6  -2   8  339.77   14.30
   6   2  -8  348.87   22.30
   6   2  -8  349.27   14.60
  -6  -2  -8  330.17   14.30
  -6   2   8  347.07   13.80
  -6  -2  -8  339.47   16.10
  -6  -2   8  356.76   14.90
   6  -2  -8  354.06   13.50
   6   2   8  343.17   14.20
   6  -2  -8  341.87   14.00
  -6   2  -8  341.87   15.10
   6  -2  -8  356.76   14.80
   6   2   8  335.47   17.10
  -7  -2  -8  263.77   12.10
   7   2  -8  228.88   13.40
   7  -2   8  268.07   11.40
   7   2  -8  270.87   11.00
   7  -2   8  276.27   11.00
   7  -2  -8  259.17   10.30
  -7  -2   8  270.87   11.20
  -7   2  -8  265.97   11.50
   7  -2  -8  259.07   11.00
   7   2   8  275.17   11.00
   8   2  -8   57.89    3.60
   8  -2   8   55.99    3.80
  -8  -2  -8   75.39    6.10
   0   3  -8  214.68   14.10
   0  -3  -8  222.58    9.60
   0   3  -8  224.78   14.50
   0  -3   8  234.78   18.50
   0  -3   8  173.68   10.00
   0   3  -8  203.28    9.20
   1   3  -8 1894.71   66.09
  -1  -3  -8 1938.71   63.39
   1   3  -8 1802.72   59.89
   1  -3   8 1691.83   67.49
   1  -3   8 1780.02   67.69
   1   3  -8 1801.02   64.89
   1   3   8 1910.21   62.79
  -1   3  -8 1886.81   65.89
  -1   3  -8 1780.32   59.59
  -1  -3   8 1792.12   59.89
   2   3  -8   18.10   21.40
   2   3  -8   -0.40    2.30
   2  -3   8   -4.70    3.00
  -2  -3  -8   -9.50    7.50
   2   3  -8    1.40    2.70
  -2  -3  -8    1.70    4.50
   2  -3   8    6.10   16.80
   2   3  -8  -11.80    7.50
   2   3  -8   15.00    8.90
   2  -3   8   -0.60    2.00
   2   3   8    9.20    8.10
  -2  -3   8    2.30    2.30
  -2   3  -8    2.20    1.90
   2  -3  -8   -1.40    3.60
   2   3   8    0.50    1.60
  -2   3  -8    1.10    9.60
  -3  -3  -8   -1.20    2.10
   3  -3   8    1.00   13.70
   3   3  -8    2.00    3.90
   3  -3   8    3.40    4.40
  -3  -3  -8    8.30   14.00
   3  -3   8    4.60    2.00
  -3  -3  -8   -3.10    4.10
   3   3  -8    5.40   12.50
   3   3  -8    3.10    2.10
   3   3   8    7.20    2.60
   3  -3  -8   -2.40    7.20
   3   3   8   -1.20   14.50
  -3   3  -8    2.10    2.50
  -3  -3   8    2.70    2.90
   4   3  -8   10.20    6.90
   4  -3   8   11.70    2.40
  -4  -3  -8   16.20    3.70
   4  -3   8   17.00    6.80
   4   3  -8    9.40    2.50
   4  -3   8   14.00    4.00
   4   3  -8   10.90    3.40
  -4  -3  -8   23.50    3.80
  -4  -3  -8   16.00    4.30
  -4  -3  -8   40.00   10.90
   4   3   8   21.40   35.20
  -4   3  -8   13.90    3.20
  -4   3  -8   14.20    4.80
   4  -3  -8    7.30    3.50
  -4  -3   8    4.80    5.50
  -4  -3   8   12.70    3.40
   4   3   8   10.80    4.80
  -4  -3   8   12.20    4.80
   4   3   8   12.80    3.60
  -5  -3  -8  518.55   19.30
   5   3  -8  510.85   18.80
  -5   3   8  482.55   19.20
  -5  -3  -8  519.45   19.00
  -5  -3  -8  525.95   20.20
   5   3  -8  533.05   19.40
  -5  -3  -8  546.15   25.00
   5  -3   8  532.75   18.90
   5  -3   8  518.55   20.00
   5  -3   8  526.55   24.70
   5   3  -8  533.35   23.60
  -5  -3  -8  500.75   22.60
   5   3   8  528.95   19.90
  -5  -3   8  529.45   19.70
  -5   3  -8  507.45   19.50
   5  -3  -8  537.05   18.90
  -5  -3   8  515.65   20.80
   5   3   8  520.65   21.10
  -5   3  -8  519.65   20.70
   6  -3   8   13.80    3.00
   6   3  -8   11.30    3.30
  -6  -3  -8    7.80    5.50
   6   3  -8    7.40    2.90
  -6  -3  -8    5.40    6.60
   6  -3   8   13.90    3.70
   6   3  -8   12.90    2.50
   6   3  -8   15.80    8.70
   6  -3   8    4.70   10.90
  -6  -3  -8   14.70    3.70
   6  -3  -8    8.00    4.70
   6   3   8   12.20    3.70
  -6  -3   8   10.00    3.80
  -6   3  -8    7.20    3.80
   6  -3  -8    6.10    2.50
   6  -3  -8   14.90    3.40
   6   3   8   16.90    5.60
  -7  -3  -8   91.19    7.50
   7  -3   8   86.29    5.50
   7  -3   8   92.69    6.10
  -7  -3  -8   88.49    6.30
   7   3  -8   85.59    5.50
  -7   3  -8   91.79    6.00
  -7  -3   8   92.29    6.00
   7  -3  -8   87.79    5.10
   7  -3  -8   94.59    6.50
   7   3   8   95.39    6.40
   0   4  -8  497.65   24.60
   0   4  -8  477.35   17.30
   0  -4   8  465.95   17.90
   1   4  -8  119.09    6.50
  -1  -4  -8  119.49   11.80
   1   4  -8  130.99   16.00
   1  -4   8  111.99   20.00
   1  -4   8  118.39    6.10
   1   4  -8  116.29   13.30
   1  -4   8  105.69    7.30
   1   4   8  112.39   12.30
  -1   4  -8   86.59   12.00
  -1  -4   8  110.89    6.80
  -1   4  -8  102.89    5.80
  -2  -4  -8  650.03   22.00
   2   4  -8  636.04   23.20
  -2  -4  -8  628.14   31.60
   2   4  -8  614.94   33.10
   2  -4   8  621.44   21.60
   2  -4   8  643.34   24.20
   2   4  -8  645.24   33.60
   2   4  -8  645.44   21.80
  -2  -4   8  641.94   23.30
  -2   4  -8  617.64   34.80
   2   4   8  597.94   31.80
  -2  -4   8  662.03   21.90
  -2   4  -8  648.74   22.50
   3   4  -8  230.78   33.60
   3  -4   8  181.48   26.40
   3  -4   8  216.98    9.00
   3   4  -8  234.08   10.30
  -3  -4  -8  220.68    9.20
   3   4  -8  217.28    9.20
   3   4  -8  235.18   11.70
  -3  -4  -8  200.68   13.30
   3   4  -8  197.68   32.00
   3  -4   8  215.88   12.90
  -3  -4  -8  186.58   24.90
  -3  -4   8  235.98   11.20
   3   4   8  239.88    9.60
  -3   4  -8  221.98   11.70
  -3   4  -8  231.98    9.90
   4   4  -8   70.19    8.40
   4   4  -8   76.19    6.30
  -4  -4  -8   60.79    6.40
   4   4  -8   76.79    5.10
   4  -4   8   69.59   11.80
  -4  -4  -8   74.49    7.50
  -4  -4  -8   66.39    8.50
   4  -4   8   66.99    7.00
   4  -4   8   65.19    4.90
  -4  -4  -8   73.39    5.20
  -4  -4   8   70.59    7.60
   4   4   8   73.39    6.30
   4   4   8   76.09    9.30
  -4  -4   8   59.09    7.10
  -4  -4   8   63.89    8.00
  -4   4  -8   68.19    7.30
  -4   4  -8   72.59    5.80
   5   4  -8  222.98    9.60
  -5  -4  -8  224.98   15.10
   5  -4   8  223.78   19.50
   5  -4   8  212.08   10.70
  -5  -4  -8  225.78    9.80
  -5  -4  -8  213.48   10.30
  -5  -4  -8  220.28   15.70
  -5  -4  -8  221.08   11.10
   5   4  -8  218.28   14.30
   5  -4   8  219.68    9.40
   5   4  -8  222.38    9.90
  -5  -4   8  210.78   11.40
   5   4   8  207.88   11.40
  -5   4  -8  218.78   11.30
   5   4   8  206.08   11.10
  -5  -4   8  207.08   11.70
  -5  -4   8  213.28   11.60
   5  -4  -8  211.88    9.50
  -6  -4  -8   83.29    7.20
   6  -4   8   73.59   16.00
   6   4  -8   81.89    6.40
   6  -4   8   76.29    6.70
   6   4  -8   78.39    6.40
  -6  -4  -8  118.69   17.20
  -6  -4  -8   87.99    6.70
   6   4  -8   81.99    5.40
   6  -4   8   75.89    5.60
  -6  -4  -8   81.09   12.90
   6  -4   8   82.49    6.60
   6   4   8   69.89   10.20
  -6  -4   8   95.59    7.50
   6  -4  -8   85.89    7.90
  -6   4  -8   96.59    7.00
   6  -4  -8   78.89    5.50
   6   4   8   70.19    9.60
  -7  -4  -8   40.10    4.80
   7  -4   8   27.40    6.60
   7  -4   8   38.70    4.30
   7   4  -8   40.10    4.00
   7  -4   8   46.20    4.20
  -7  -4  -8   29.40    4.00
  -7  -4   8   43.40    4.50
   7  -4  -8   35.60    3.60
  -7   4  -8   38.90    4.40
   0  -5   8   13.60    4.00
   0  -5   8   10.80    2.30
   0   5  -8   17.00   11.80
   0   5  -8   12.70    2.60
   1   5  -8   79.69    5.80
   1  -5   8   69.99    7.60
   1   5  -8   90.89   16.40
   1  -5   8   87.19    4.80
  -1  -5   8   82.59    4.90
  -1   5  -8   84.09    5.20
  -1   5  -8   83.39   16.30
  -1  -5   8   83.29    7.00
   2  -5   8  657.33   22.90
   2  -5   8  684.63   26.30
   2   5  -8  662.33   23.00
   2   5  -8  633.44   41.20
   2   5  -8  643.24   36.80
   2   5  -8  664.63   24.50
  -2  -5  -8  687.33   23.30
  -2   5  -8  701.83   23.60
  -2  -5   8  694.83   25.40
  -2  -5   8  670.83   23.00
  -3  -5  -8  159.18   15.30
   3   5  -8  180.18   10.20
   3   5  -8  161.88    8.60
   3  -5   8  173.78    9.90
   3  -5   8  147.99   13.70
  -3  -5  -8  179.88   10.30
   3  -5   8  177.38    7.70
  -3  -5  -8  171.78   10.60
   3   5  -8  171.48    8.30
  -3  -5  -8  172.58    8.00
  -3   5  -8  176.38   10.10
  -3  -5   8  153.38   11.20
  -3  -5   8  175.18   10.00
  -3   5  -8  181.58   13.90
  -3  -5   8  176.98    8.40
  -3   5  -8  175.48    8.00
  -3  -5   8  166.48    9.40
  -3  -5   8  169.78   10.20
   4   5  -8   29.70    3.70
   4  -5   8   26.10    4.30
  -4  -5  -8   26.20    5.20
   4   5  -8   37.90    6.00
  -4  -5  -8   22.30    8.00
  -4  -5   8   27.50    5.50
  -4   5  -8   32.90    6.70
   4   5   8   28.70    4.90
  -4  -5   8   25.80    7.30
  -5  -5  -8   80.39    5.80
   5   5  -8   62.69    5.50
   5  -5   8   67.19    6.90
  -5  -5  -8   72.79    7.20
   5   5  -8   81.29   10.50
  -5  -5  -8   73.69    6.20
   5  -5   8   78.69   14.30
   5  -5   8   79.89    5.30
  -5  -5  -8   96.49   14.30
   5   5   8   78.19    7.50
  -5  -5   8   63.79    9.40
  -5  -5   8   78.69   11.00
  -5  -5   8   88.09    9.30
  -5   5  -8   68.39    7.00
   5  -5  -8   83.39    8.60
  -6  -5  -8  121.09    7.40
   6  -5   8  111.09    6.10
  -6  -5  -8  107.89    6.80
   6   5  -8   95.99   12.90
  -6  -5  -8  106.59   12.10
   6  -5   8  119.69    7.20
  -6  -5  -8  125.29   15.40
   6  -5   8  117.19    7.60
   6   5  -8  115.39    6.90
  -6  -5   8  118.59    8.20
  -6   5  -8  114.49    7.40
   6  -5  -8  113.09    6.40
  -7  -5  -8  119.29    8.90
   7   5  -8  100.69    5.30
   7  -5   8  111.79    5.90
  -7  -5  -8  115.09    8.20
   7  -5   8   97.79    5.50
  -7  -5   8  115.39    6.10
  -7   5  -8  103.79    6.40
   7  -5  -8  101.59    5.40
   0  -6   8  284.67   11.10
   0   6  -8  293.47   11.80
   0  -6   8  296.37   14.60
   1  -6   8  154.48   11.70
   1   6  -8  178.68    8.70
   1  -6   8  158.58    7.30
   1   6  -8  172.38   25.30
  -1   6  -8  180.58    7.80
  -1  -6   8  169.88   10.80
  -1  -6   8  158.68    7.40
   2  -6   8   26.80    7.80
   2  -6   8   25.20    3.50
   2   6  -8  -21.30   24.10
  -2  -6  -8   25.10    3.40
   2  -6   8   19.80    4.80
   2   6  -8   31.80    7.20
  -2   6  -8   20.40    4.30
  -2  -6   8   19.20    5.20
  -2  -6   8   25.90    4.80
  -2   6  -8   25.70    6.80
  -2   6  -8   21.40    2.90
  -2  -6   8   27.40    4.30
  -2  -6   8   17.60    2.80
   3   6  -8  315.27   23.20
   3   6  -8  342.07   13.60
  -3  -6  -8  347.97   13.60
  -3  -6  -8  332.77   15.10
   3  -6   8  334.17   14.60
  -3  -6  -8  341.17   15.30
   3  -6   8  353.56   13.20
   3   6  -8  342.17   15.30
   3  -6   8  353.16   15.80
   3  -6   8  315.87   27.40
  -3  -6   8  340.47   17.20
  -3  -6   8  365.86   16.80
  -3   6  -8  358.56   14.80
  -3  -6   8  351.46   14.80
  -3   6  -8  367.66   17.50
  -3  -6   8  348.97   14.10
  -3  -6   8  358.96   13.60
   4  -6   8  391.36   16.40
  -4  -6  -8  406.26   16.20
   4  -6   8  396.66   16.90
   4   6  -8  402.96   15.10
   4  -6   8  408.96   15.20
  -4  -6  -8  391.86   23.10
  -4  -6  -8  404.96   16.80
   4   6  -8  391.36   17.80
  -4  -6  -8  424.16   15.50
  -4  -6   8  389.06   15.40
  -4   6  -8  405.76   16.60
  -4  -6   8  398.86   18.50
  -4  -6   8  397.06   18.10
  -4  -6   8  406.36   16.60
  -5  -6  -8   52.99    5.60
   5  -6   8   61.19    7.00
   5  -6   8   73.79    6.60
  -5  -6  -8   60.29    6.50
   5   6  -8   61.99    9.80
   5  -6   8   58.69    5.10
  -5  -6  -8   66.39    5.80
  -5  -6  -8   48.80   10.20
  -5  -6   8   68.09    9.50
  -5  -6   8   73.79    6.80
  -5   6  -8   65.69    6.50
   5  -6  -8   62.59    6.00
  -5  -6   8   79.09    8.30
  -6  -6  -8   55.29    5.10
   6  -6   8   51.39    5.60
   6  -6   8   50.89    4.40
   6   6  -8   47.90    4.80
   6  -6   8   56.39    5.40
  -6   6  -8   55.59    5.10
   6  -6  -8   54.49    5.20
  -6  -6   8   45.60    6.30
   7  -6   8    3.40    2.10
   7  -6   8   -2.50    1.90
  -7  -6  -8   -0.70    2.30
  -7  -6   8   -2.20    2.20
   0   7   8   38.80    7.10
   0  -7   8   28.80    5.20
   0   7  -8   30.80    5.20
   0   7  -8   26.60    6.30
   0  -7   8   45.80    8.20
   0  -7   8   31.20    3.60
   1  -7   8  320.47   14.80
   1   7  -8  347.27   13.60
  -1   7   8  330.47   18.10
   1   7  -8  327.37   14.90
  -1  -7  -8  331.37   13.40
   1   7  -8  325.97   16.60
   1  -7   8  356.56   12.90
   1  -7   8  332.87   18.80
  -1  -7   8  350.66   17.30
  -1   7  -8  339.37   16.70
   1   7   8  331.67   16.10
  -1  -7   8  349.77   13.00
  -1   7  -8  333.57   14.80
  -1  -7   8  326.97   13.90
  -1   7  -8  336.37   12.20
  -1  -7   8  332.07   14.80
  -2  -7  -8  442.26   16.10
  -2  -7  -8  386.56   19.50
   2  -7   8  437.56   15.90
   2  -7   8  430.76   17.50
   2  -7   8  418.66   23.70
   2   7  -8  447.06   17.30
   2   7  -8  411.16   19.40
  -2  -7   8  434.26   16.80
  -2  -7   8  415.66   17.30
  -2  -7   8  432.36   16.00
  -2   7  -8  427.56   17.40
  -2  -7   8  465.65   20.10
  -2   7  -8  424.46   19.40
  -2  -7   8  433.26   21.60
  -3  -7  -8  276.87   11.50
   3  -7   8  277.87   11.20
   3  -7   8  286.97   12.80
  -3  -7  -8  271.57   12.90
   3   7  -8  277.37   13.10
  -3  -7  -8  273.97   13.10
   3  -7   8  230.58   15.70
  -3  -7   8  270.97   12.70
  -3  -7   8  276.07   15.20
  -3  -7   8  273.77   11.40
  -3  -7   8  275.97   16.50
  -3  -7   8  281.27   11.90
  -3   7  -8  263.87   16.10
  -3   7  -8  272.37   12.70
   4  -7   8  177.28   10.40
   4  -7   8  189.48    8.60
  -4  -7  -8  175.28    9.70
   4   7  -8  186.48   11.60
  -4  -7  -8  201.18    9.00
  -4  -7  -8  195.38   10.40
   4  -7   8  183.58    9.90
  -4   7  -8  172.58    9.90
  -4  -7   8  180.08   12.40
  -4  -7   8  186.88    9.20
  -4  -7   8  192.78   13.10
  -4  -7   8  183.88   10.10
  -5  -7  -8   38.60    4.80
  -5  -7  -8   60.49   13.70
   5  -7   8   43.10    4.50
  -5  -7  -8   56.29    5.00
   5   7  -8   41.90    6.90
  -5  -7  -8   40.00    5.70
  -5  -7   8   42.90    7.20
   5  -7  -8   38.40    4.30
  -6  -7  -8   42.60    4.30
   6  -7   8   31.50    3.90
   6  -7   8   34.80    4.90
   6  -7   8   37.40    4.20
  -6  -7   8   31.60    4.20
   6  -7  -8   28.90    4.30
  -6   7  -8   34.20    4.50
   0   8   8    1.40    5.30
   0   8  -8    0.20    3.70
   0  -8   8    5.20    8.10
   0   8  -8   -0.80    4.90
   0  -8   8    1.80    2.30
   0  -8   8    2.50    3.80
   1   8  -8  184.08    8.20
   1  -8   8  175.88   10.20
   1   8  -8  166.08   11.60
  -1  -8  -8  176.38    8.80
   1  -8   8  172.38    7.90
  -1   8   8  154.78   13.40
  -1  -8   8  173.58   14.50
  -1   8  -8  143.09   12.30
  -1   8  -8  149.88   13.70
  -1  -8   8  177.48    9.30
  -1  -8   8  178.18    8.90
  -1  -8   8  157.98   10.10
   1   8   8  163.38   11.90
   2   8  -8  233.98   12.00
   2   8  -8  249.48   14.20
  -2  -8  -8  266.47   11.10
  -2  -8  -8  224.48   15.20
   2  -8   8  261.07   10.70
   2  -8   8  248.18   12.10
  -2  -8   8  272.37   12.50
  -2  -8   8  269.37   11.60
  -2   8  -8  253.87   14.10
  -2  -8   8  249.97   10.80
  -2   8  -8  265.77   12.10
  -2  -8   8  264.97   16.20
  -3  -8  -8   42.90    5.00
  -3  -8  -8   52.39    6.90
   3   8  -8   42.30    6.90
   3   8  -8   52.39    9.60
  -3  -8  -8   41.80    5.50
   3  -8   8   44.60    4.80
   3  -8   8   41.30    6.60
  -3  -8   8   36.30    8.20
  -3  -8   8   45.90    6.40
  -3  -8   8   51.79    8.50
  -3  -8   8   37.70    5.70
  -3  -8   8   58.69    5.70
  -3   8  -8   38.00    6.30
  -3   8  -8   49.10    6.50
  -4  -8  -8   24.40    4.10
   4  -8   8   12.40    4.80
   4  -8   8   21.10    3.20
  -4  -8  -8   14.40    3.30
   4  -8   8   19.80    4.20
   4   8  -8   19.90    5.10
  -4  -8  -8   19.80    3.40
  -4  -8   8   22.30    7.30
  -4   8  -8   20.80    3.80
  -4  -8   8   19.60    4.00
  -4  -8   8    8.70    5.70
  -4  -8   8   21.40    3.30
   5   8  -8   84.09    6.70
   5  -8   8  100.59    6.60
  -5  -8  -8   82.89    6.20
  -5  -8  -8   94.29    5.70
   5  -8   8   79.39    7.40
   5  -8   8   90.19    5.50
  -5  -8  -8   89.39    5.90
   5  -8  -8   73.89    7.40
  -5  -8   8   89.49    6.30
  -5   8  -8   91.29    5.80
  -5  -8   8  100.99    8.30
   6  -8   8   28.90    3.90
  -6  -8  -8   23.30    3.40
   6  -8   8   24.10    3.90
   6  -8   8   31.60    5.10
  -6  -8   8   24.40    3.60
   0   9  -8  311.27   15.90
   0   9  -8  314.67   14.10
   0   9   8  318.37   15.90
   0  -9   8  315.77   14.10
   0  -9   8  334.67   12.80
   0  -9   8  318.87   22.30
   1  -9   8   86.79    7.70
   1   9  -8   90.59    9.50
  -1  -9  -8   84.99    6.50
  -1   9   8   90.99   10.50
   1  -9   8   88.39    5.60
  -1   9  -8   88.29    9.40
  -1  -9   8   88.19    6.90
  -1  -9   8   91.89    7.80
  -1   9  -8   94.59    7.20
  -1  -9   8   80.59    5.90
  -1  -9   8  102.09   16.80
   2  -9   8    3.90    2.60
   2  -9   8    2.20    4.10
   2   9  -8    9.10    5.10
  -2  -9  -8    5.20    4.80
  -2  -9  -8   13.00    3.20
  -2  -9  -8    9.40    5.30
  -2  -9   8    6.40    3.00
  -2  -9   8   23.30    8.60
  -2  -9   8    9.00    3.80
  -2   9  -8   12.50    3.70
  -2  -9   8    5.70    3.00
  -2   9  -8   11.90    5.10
  -3  -9  -8   39.10    4.80
   3  -9   8   26.60    4.30
   3   9  -8   27.30    5.60
  -3  -9  -8   37.80    5.80
   3  -9   8   39.00    6.10
  -3  -9  -8   24.50    4.60
  -3  -9   8   31.20    4.90
  -3   9  -8   19.00    5.60
  -3  -9   8   24.10    4.00
  -3  -9   8   27.10    4.00
  -3   9  -8   32.60    4.20
  -3  -9   8   20.10    8.20
  -4  -9  -8   80.39    5.60
   4  -9   8   82.09    6.60
  -4  -9  -8   84.09    5.90
  -4  -9  -8   86.59    6.50
   4  -9   8   76.29    5.20
  -4  -9   8   86.99    6.50
  -4  -9   8   75.39   10.00
  -4   9  -8   71.29    5.90
  -4  -9   8   71.59    5.80
  -4  -9   8   73.49   10.60
   5  -9   8    8.20    2.70
  -5  -9  -8    7.40    2.90
   5  -9   8    5.70    2.20
  -5  -9  -8   11.60    2.20
  -5  -9  -8   11.30    2.60
  -5  -9   8   16.40    6.50
  -5  -9   8   10.90    2.60
  -6  -9  -8   46.90    3.50
   0 -10  -8  215.48   10.10
   0  10  -8  195.98   12.10
   0 -10   8  214.58    9.30
   0 -10   8  197.78    9.80
   0 -10   8  198.88   10.60
  -1 -10  -8  189.78    9.20
   1  10  -8  186.88   11.70
   1 -10   8  196.58   10.00
   1 -10   8  205.18    9.00
  -1 -10   8  197.68    9.10
  -1 -10   8  202.88   10.40
  -1 -10   8  140.29   16.80
  -1 -10   8  191.78    9.40
  -1  10  -8  192.98   11.90
   2  10  -8   11.00    4.70
  -2 -10  -8    6.30    2.70
   2 -10   8    7.20    2.60
   2 -10   8   12.20    3.90
  -2 -10  -8   14.30    4.20
  -2 -10   8    9.80    3.00
  -2 -10   8    9.50   11.40
  -2  10  -8   14.00    3.30
  -2  10  -8    5.00    4.50
  -2 -10   8    7.30    3.30
  -2 -10   8    9.60    2.90
   3 -10   8   80.19    6.50
  -3 -10  -8   65.19    6.00
   3 -10   8   73.29    5.10
   3  10  -8   72.99    8.10
  -3 -10  -8   62.69    6.60
  -3 -10  -8   70.09    5.20
  -3 -10   8   72.49    6.50
  -3 -10   8   79.29   12.80
  -3 -10   8   76.09    5.40
  -3  10  -8   65.49    8.60
  -3 -10   8   69.19    6.00
  -3  10  -8   64.49    5.60
   4 -10   8   26.10    3.50
  -4 -10  -8   21.90    2.80
  -4 -10  -8   21.60    3.00
  -4 -10  -8   28.30    4.30
   4 -10   8   24.70    3.70
  -4 -10   8   30.00    4.10
   5 -10   8   21.10    3.30
  -5 -10  -8   11.70    3.10
  -5 -10   8   15.90    2.40
   0 -11   8    3.70    3.30
   0 -11   8    2.10    2.40
   0 -11  -8   -1.40    3.20
   1 -11   8    0.50    2.40
  -1 -11  -8    0.40    4.30
   1 -11   8   -0.80    2.10
  -1 -11  -8    6.00    2.90
   1 -11   8    0.80    3.20
   1  11  -8    1.50    3.60
  -1  11  -8    2.60    3.90
  -1 -11   8   -1.20    3.10
  -1 -11   8    3.30    2.50
  -1 -11   8   -0.40    2.30
   2 -11   8    7.00    2.30
  -2 -11  -8    8.00    2.60
   2  11  -8    7.20    3.80
  -2 -11  -8    6.10    3.10
   2 -11   8    9.30    3.20
  -2 -11   8    6.00    2.30
  -2 -11   8    6.20    2.80
  -2 -11   8   13.80    2.90
  -2  11  -8    8.50    4.00
  -3 -11  -8   13.90    3.40
  -3 -11  -8    6.20    3.10
   3 -11   8    6.70    2.50
   3 -11   8    6.50    2.90
  -3 -11  -8    7.70    2.40
  -3 -11   8    9.00    2.40
  -3 -11   8    4.20    2.50
   4 -11   8   67.99    5.30
  -4 -11  -8   69.09    4.80
  -4 -11  -8   68.19    5.30
  -4 -11  -8   75.09    4.90
   4 -11   8   69.49    4.20
   0 -12   8   14.30    2.40
   0 -12  -8   14.60    3.20
   0 -12   8   11.90    3.10
   0 -12   8   10.90    2.70
   0  12  -8   13.60    3.60
  -1 -12  -8  107.69    6.70
   1 -12   8   97.19    6.40
  -1 -12  -8  100.99    5.90
   1 -12   8  102.19    5.50
   1  12  -8   91.49    6.90
  -1 -12   8  106.29    5.50
  -1  12  -8  103.89    7.20
  -1 -12   8   98.19    5.70
  -1 -12   8  101.79    6.20
   2  12  -8   14.10    3.20
   2 -12   8    7.40    2.00
  -2 -12  -8    8.80    2.30
  -2 -12  -8    1.60    2.20
   2 -12   8    7.90    2.20
   2 -12   8    8.80    4.20
  -2  12  -8    0.90    5.70
  -2 -12   8    8.90    2.00
  -2 -12   8    0.80    4.90
  -2 -12   8    9.10    2.30
   3 -12   8   28.20    2.80
  -3 -12  -8   32.30    3.10
  -3 -12  -8   36.90    4.90
  -3 -12   8   33.60    3.20
   0 -13   8   25.00    3.80
   0 -13   8   27.40    2.80
   0  13  -8   30.10    4.10
   1 -13   8   10.70    1.80
   1  13  -8   11.00    2.60
  -1  13  -8   11.10    2.80
  -1 -13   8    6.90    2.10
  -1 -13   8   11.30    1.80
   2 -13   8   24.90    2.60
  -2 -13   8   22.80    3.70
   0   0   9    1.50    1.10
   0   0   9   -2.70    4.70
   0   0  -9    4.30    3.50
   0   0   9    6.00    4.70
   1   0  -9 1503.85   50.09
  -1   0   9 1418.56   46.30
   1   0  -9 1476.15   50.59
  -1   0  -9 1398.76   47.80
   1   0   9 1485.05   52.79
  -1   0   9 1404.56   50.79
  -1   0   9 1473.05   46.50
  -1   0  -9 1494.25   51.79
   2   0  -9  284.27   15.10
  -2   0  -9  287.57   18.10
   2   0  -9  276.37   18.60
   2   0   9  262.97   11.00
   2   0   9  279.37   17.80
   3   0  -9   35.30    9.90
  -3   0  -9   48.90   13.70
   3   0   9   24.90    4.10
   3   0  -9   37.10    4.90
  -3   0  -9   30.50    5.20
  -3   0  -9   24.60    4.00
   3   0   9   27.10    4.10
   3   0   9   53.89   13.40
  -4   0  -9   27.10    4.20
  -4   0  -9   29.90    5.00
   4   0   9   42.10    6.30
  -4   0  -9   36.50    5.40
   4   0   9   24.20    4.90
   4   0   9   33.50   23.10
   4   0  -9   34.40   19.30
  -4   0   9   40.10    5.10
  -4   0  -9   38.70    6.70
  -4   0  -9   33.90    4.70
   4   0   9   33.90    4.30
  -5   0  -9  190.88   10.10
   5   0  -9  212.38    9.20
  -5   0  -9  212.08   11.50
  -5   0  -9  202.28   12.00
   5   0   9  205.88   13.00
  -5   0   9  202.58   10.50
   5   0   9  203.78   10.40
   5   0   9  189.28    9.10
  -5   0  -9  194.48   10.70
   6   0   9  374.86   15.00
  -6   0  -9  347.37   16.80
   6   0  -9  370.66   15.10
   6   0  -9  362.76   14.60
  -6   0  -9  368.16   16.20
  -6   0   9  372.06   15.00
   6   0   9  347.97   18.60
   6   0  -9  379.86   14.20
  -6   0  -9  362.16   15.20
   7   0   9    0.20    2.50
   7   0   9    3.10    3.30
   7   0  -9    3.00    2.60
  -7   0   9   -0.50    2.60
   7   0  -9    1.60    2.10
  -7   0  -9    4.20    3.20
   7   0  -9    3.10    2.20
  -8   0  -9   11.40    2.30
   0  -1   9 1240.68   40.30
   0   1  -9 1237.48   44.20
   0   1   9 1213.38   42.40
   0  -1   9 1192.48   44.70
   0   1  -9 1195.48   40.70
   0  -1   9 1253.57   45.30
   0   1   9 1241.48   42.40
   0  -1  -9 1279.07   42.50
  -1  -1  -9  103.59    8.80
   1   1  -9  104.39    9.10
  -1   1   9   90.09    8.10
   1  -1   9  113.29   13.70
   1  -1   9  109.69   12.80
   1   1  -9  104.09    6.60
   1   1  -9  107.29    8.40
   1  -1  -9  106.29    6.80
  -1  -1   9   94.79   11.30
   1   1   9  102.49    8.90
   1   1   9   97.49   12.00
  -1   1  -9  102.49   10.10
  -1   1  -9   97.59    5.50
   1  -1  -9  106.09    7.00
   1   1   9   97.19    4.50
  -1  -1   9   92.79    5.20
   2  -1   9  782.92   33.30
   2   1  -9  805.22   36.60
  -2   1   9  757.92   31.70
   2  -1   9  772.52   27.50
   2   1  -9  766.22   28.10
   2   1  -9  814.62   32.30
  -2  -1  -9  823.32   33.90
  -2  -1  -9  804.92   27.80
  -2  -1   9  810.92   26.60
  -2   1  -9  789.42   33.80
  -2   1  -9  774.52   27.50
   2   1   9  792.12   27.10
   2   1   9  808.32   33.10
   2  -1  -9  841.92   30.00
   2  -1  -9  793.82   31.60
  -3  -1  -9 1034.90   36.60
  -3  -1  -9 1055.29   35.00
   3   1  -9 1039.20   44.10
   3  -1   9 1068.99   36.80
   3  -1   9 1047.60   34.70
   3   1  -9 1012.30   35.00
   3  -1   9 1086.29   46.40
   3   1   9 1026.30   49.50
   3   1   9 1119.59   36.40
  -3   1  -9 1020.80   47.60
  -3  -1   9 1075.19   34.80
  -3   1  -9 1059.79   36.40
   3  -1  -9 1041.50   41.70
   4  -1   9  179.38    9.60
   4  -1   9  140.09   28.60
  -4  -1  -9  160.08   10.40
  -4  -1  -9  173.98    9.80
   4   1  -9  198.98   15.70
  -4   1   9  192.48   10.00
   4   1  -9  180.38    8.00
   4   1  -9  168.18   10.50
  -4  -1  -9  187.38   13.70
  -4  -1  -9  186.68    9.40
  -4  -1  -9  140.99   31.90
   4  -1   9  177.28   11.20
  -4  -1   9  165.08    9.90
  -4   1  -9  173.88    9.60
   4  -1  -9  180.48    8.20
   4   1   9  177.48    9.70
  -4   1  -9  165.28   10.60
   4  -1  -9  218.58   32.90
  -4   1  -9  175.08   11.90
  -4   1  -9  164.98   14.00
   4   1   9  190.58   28.50
   5   1  -9   97.99    6.00
  -5  -1  -9   96.79    7.80
  -5  -1  -9   97.49    8.80
  -5  -1  -9   95.09    7.50
   5  -1   9   93.39    6.00
   5  -1   9   94.09    7.50
   5  -1   9  118.59   11.00
   5   1  -9  106.59    7.50
  -5   1   9   97.49    7.60
  -5  -1  -9   89.19    9.40
   5   1   9   93.59    9.10
   5   1   9   89.59    7.40
  -5   1  -9   75.49    8.40
   5  -1  -9   95.19    6.10
  -5   1  -9  113.99    8.90
  -5  -1   9   85.69    7.90
  -5   1  -9  104.59    9.10
   6   1  -9  370.16   13.70
   6   1  -9  335.97   13.90
   6  -1   9  341.47   14.40
   6  -1   9  322.07   13.70
   6   1  -9  358.96   14.70
  -6  -1  -9  357.06   14.70
  -6  -1  -9  339.47   16.90
  -6  -1  -9  352.76   16.00
  -6   1   9  353.16   14.20
   6  -1   9  310.97   18.80
   6  -1  -9  355.56   14.70
  -6   1  -9  335.57   15.40
   6   1   9  352.16   14.40
   6  -1  -9  351.16   13.60
   6   1   9  356.46   15.10
   6  -1  -9  370.06   14.20
  -6   1  -9  356.26   15.70
  -6  -1   9  361.06   14.90
   6   1   9  355.96   17.70
  -7   1   9  114.39    6.40
   7   1  -9  134.49    6.60
  -7  -1  -9  123.49    7.90
   7  -1   9  129.69    7.50
   7  -1   9  133.29    7.00
   7   1  -9  121.09    7.00
   7   1  -9  135.39    6.30
   7  -1  -9  129.89    6.40
  -7   1  -9  129.19    7.60
   7  -1  -9  130.09    7.10
   7  -1  -9  119.59    6.30
   7   1   9  139.69    7.10
  -7  -1   9  133.79    7.00
   7   1   9  127.59    8.90
   8   1  -9   -1.20    1.80
  -8  -1  -9    1.40    2.20
  -8   1  -9    3.80    2.30
   0   2  -9  632.04   25.90
   0   2   9  587.94   21.80
   0   2  -9  614.24   21.30
   0  -2   9  564.94   27.30
   0  -2  -9  647.84   22.40
   0   2   9  630.24   21.90
   0  -2   9  577.54   27.90
   1   2  -9    6.50    5.00
   1  -2   9    2.90   10.20
  -1  -2  -9   11.50    4.70
   1  -2   9    2.80    2.20
   1   2  -9    4.80    5.50
   1   2  -9    4.50    2.80
   1  -2   9    5.50    9.80
  -1  -2   9    2.50    1.80
  -1   2  -9    4.80    2.60
  -1   2  -9    3.20    5.60
   1   2   9    4.10    4.70
   2   2  -9 2352.26   80.99
   2   2  -9 2269.67   81.39
   2   2  -9 2227.58   75.09
  -2  -2  -9 2286.77   81.19
  -2  -2  -9 2233.78   75.19
   2  -2   9 2214.48   74.99
   2  -2   9 2308.67   90.59
   2   2  -9 2351.36   87.19
   2   2   9 2332.87   80.99
   2   2   9 2323.67   74.09
  -2   2  -9 2277.27   82.09
   2  -2  -9 2296.87   75.19
   2  -2  -9 2330.17   76.79
  -2   2  -9 2280.37   74.69
  -2  -2   9 2319.57   74.49
   3  -2   9  308.27   11.20
  -3  -2  -9  295.07   11.40
   3   2  -9  273.17   14.00
   3  -2   9  308.27   27.20
   3   2  -9  303.77   11.40
  -3  -2  -9  305.87   13.90
   3   2  -9  266.57   22.40
  -3  -2  -9  283.57   27.00
  -3   2  -9  275.17   12.00
   3   2   9  300.07   12.40
  -3   2  -9  320.17   12.80
   3   2   9  309.47   27.10
   3  -2  -9  314.57   18.60
  -3  -2   9  311.97   12.00
  -3   2  -9  306.57   29.30
  -4  -2  -9  101.99   12.60
   4   2  -9  115.89   12.10
   4  -2   9  128.49    6.30
   4  -2   9  123.59    7.80
   4   2  -9  124.69    6.50
  -4   2   9  132.69    9.20
   4  -2   9  132.39   11.60
  -4  -2  -9  130.49   14.30
   4   2  -9  134.19    8.40
  -4  -2  -9  129.09    6.60
  -4  -2  -9  120.59    8.00
  -4  -2  -9  153.58   32.40
  -4  -2  -9  125.09    8.50
  -4   2  -9  131.69    8.30
   4   2   9  136.69    9.00
  -4   2  -9  137.99    9.80
  -4  -2   9  121.89    8.80
  -4   2  -9  137.39    9.60
   4   2   9   87.59   28.10
   4  -2  -9   84.69   21.50
   4   2   9  133.59    8.40
   4  -2  -9  117.69    7.10
  -5  -2  -9   27.40    3.80
  -5  -2  -9   27.00    4.60
   5   2  -9   36.90    8.70
   5  -2   9   22.80    8.30
   5   2  -9   23.30    4.00
  -5  -2  -9   19.20    6.60
  -5   2   9   21.20    4.20
   5  -2   9   23.70    4.20
   5  -2   9   20.70    3.10
   5   2  -9   18.40    3.10
  -5  -2  -9   24.70    6.70
  -5  -2  -9   17.30    3.50
   5  -2  -9   24.10    3.50
   5  -2  -9   27.20    5.90
  -5   2  -9   22.00    4.70
  -5  -2   9   21.00    4.40
  -5   2  -9   21.30    4.90
   5  -2  -9   21.00    6.30
   5   2   9   29.10    5.80
   5   2   9   24.80    4.50
   6  -2   9  123.19    7.90
   6  -2   9  116.39    7.00
  -6  -2  -9  125.79    9.80
   6   2  -9  121.49    6.80
  -6   2   9  109.09    7.30
   6   2  -9  114.69    7.80
   6   2  -9  112.99    6.70
  -6  -2  -9  118.79   11.80
  -6  -2  -9  121.79    8.00
   6  -2   9  111.79   15.50
   6  -2  -9  107.59    8.40
  -6  -2   9  117.59    8.20
   6  -2  -9  115.99    7.50
   6   2   9  104.99   11.00
   6   2   9  124.49    7.70
  -6   2  -9  120.59    8.70
   6  -2  -9  120.69    6.70
   7   2  -9  107.59    6.60
   7  -2   9  113.59    6.70
  -7  -2  -9  119.09    7.80
   7   2  -9  118.99    6.60
   7   2  -9  118.19    5.70
   7  -2   9  124.79    6.70
   7  -2  -9  116.79    6.00
  -7   2  -9  117.89    7.00
   7  -2  -9  110.49    5.80
   7  -2  -9  102.09    6.90
   7   2   9  122.09    6.80
  -7  -2   9  118.99    6.60
   0  -3  -9  575.04   20.30
   0  -3   9  534.85   19.70
   0   3  -9  560.74   25.40
   0   3  -9  517.35   19.30
   1  -3   9    6.20    2.60
   1   3  -9   -3.80    6.50
   1  -3   9    1.50   13.50
   1   3  -9    1.10    2.50
   1   3  -9    5.90    6.90
  -1  -3  -9    3.60    4.90
  -1  -3   9    1.50    2.20
   1   3   9    4.80    5.70
  -1   3  -9    0.50    2.00
  -1   3  -9    2.80    7.30
   2   3  -9   51.39    5.70
   2   3  -9   45.40    4.20
   2  -3   9   47.50    3.70
  -2  -3  -9   51.09    6.60
   2  -3   9   53.39    6.00
   2   3  -9   42.00   10.40
   2  -3   9   55.99   25.20
   2   3  -9   38.10   24.40
   2   3  -9   60.79   11.60
  -2  -3  -9   53.89   10.50
   2  -3  -9   52.49    6.10
  -2   3  -9   48.30   12.60
   2  -3  -9   51.49    5.40
  -2   3  -9   52.09    4.60
  -2  -3   9   49.99    4.70
   2   3   9   48.40    3.30
   2   3   9   43.00   10.60
  -3  -3  -9  116.09   10.00
   3  -3   9  109.09    9.00
   3  -3   9  143.99   23.10
   3   3  -9  118.79    8.90
   3   3  -9  115.49    5.90
   3   3  -9  101.09   18.90
  -3  -3  -9  111.29    6.00
  -3  -3  -9   92.69   17.80
   3  -3   9  114.79    5.70
  -3  -3   9  116.69    7.20
   3  -3  -9  105.79   11.80
  -3   3  -9  117.39    7.10
   3   3   9  118.89    6.50
   3   3   9  101.69   18.20
  -4  -3  -9    2.60    3.30
   4  -3   9   -4.20    5.40
  -4  -3  -9    3.10    4.00
   4   3  -9    4.00    3.30
   4  -3   9    6.10    3.60
  -4  -3  -9    2.40    2.40
   4  -3   9    4.70    2.30
   4   3  -9    3.40    2.40
  -4  -3  -9    1.20    5.20
   4   3  -9    7.40    7.10
   4   3   9    8.60    5.00
  -4  -3   9    2.90    3.30
  -4   3  -9    4.30    3.10
  -4  -3   9   -6.90    5.70
  -4   3  -9    9.50    4.80
  -4  -3   9    4.70    4.70
   4   3   9    1.20    3.10
   5   3  -9   54.39    5.00
   5  -3   9   56.89    9.70
  -5  -3  -9   58.29    8.40
  -5  -3  -9   46.10    7.50
  -5  -3  -9   52.59    5.70
   5   3  -9   55.99    8.90
   5   3  -9   62.69    5.90
   5  -3   9   49.70    4.90
  -5  -3  -9   62.59    6.70
   5  -3   9   59.39    6.40
  -5  -3  -9   56.19    5.60
   5  -3  -9   58.29    5.30
  -5  -3   9   59.29    7.30
  -5   3  -9   57.79    6.80
   5   3   9   56.29    7.00
  -5  -3   9   65.49    6.70
   5   3   9   51.89    7.60
  -5   3  -9   57.89    7.60
  -6  -3  -9   41.20    6.20
   6   3  -9   60.99    5.20
   6   3  -9   53.99    4.80
   6  -3   9   38.80    6.10
   6   3  -9   64.29    5.90
  -6  -3  -9   58.19    6.10
   6  -3   9   50.09    5.80
  -6  -3  -9   52.19    8.20
   6  -3   9   47.10   12.40
   6   3  -9   49.99    9.80
   6  -3   9   57.09    5.30
   6  -3  -9   51.19    6.10
  -6   3  -9   52.89    6.60
   6   3   9   64.59    9.20
   6   3   9   66.99    6.60
   6  -3  -9   54.69    4.70
  -6  -3   9   60.79    6.60
   7   3  -9   24.70    4.00
  -7  -3  -9   34.70    4.90
   7  -3   9   27.70    4.30
  -7  -3  -9   28.80    4.40
   7  -3   9   28.10    3.90
  -7  -3   9   25.30    4.40
  -7   3  -9   29.20    4.60
   7  -3  -9   25.90    6.10
   0  -4   9    1.60    2.90
   0   4  -9    3.50    8.70
   1  -4   9  188.68   26.10
   1   4  -9  123.49   16.60
   1  -4   9  141.79    6.30
  -1  -4  -9  125.89   19.20
   1  -4   9  127.29    7.90
   1   4  -9  119.59   14.50
   1   4  -9  131.29    7.20
  -1   4  -9  140.19    6.90
   1   4   9  138.09   13.70
  -1   4  -9  145.59   18.10
  -1  -4   9  142.89    6.90
  -1  -4   9  138.19    7.80
   2   4  -9  448.36   29.20
   2   4  -9  437.46   17.20
   2   4  -9  438.46   15.70
   2  -4   9  423.46   15.50
  -2  -4  -9  429.06   15.90
   2  -4   9  449.46   18.70
  -2  -4  -9  463.35   26.90
   2   4  -9  446.86   29.20
  -2  -4   9  431.96   16.00
   2   4   9  462.15   27.50
  -2   4  -9  412.16   32.00
  -2  -4   9  459.35   17.40
  -2   4  -9  456.85   16.60
   3   4  -9  176.58   10.40
   3   4  -9  218.98   36.10
  -3  -4  -9  145.69   12.80
  -3  -4  -9  173.98   10.40
   3  -4   9  160.38    9.50
   3  -4   9  151.78    9.10
   3   4  -9  167.48    8.90
  -3  -4  -9  163.48   13.10
   3   4  -9  171.68    7.60
   3  -4   9  176.08   24.90
   3  -4   9  156.68   11.30
  -3  -4  -9  150.88    7.80
   3   4  -9  151.08   24.90
  -3  -4  -9  190.48   32.10
  -3   4  -9  173.88    8.50
  -3   4  -9  159.78   10.30
  -3  -4   9  180.38    9.50
  -3  -4   9  169.68   10.80
   3   4   9  180.98    7.50
  -3  -4   9  144.19   10.30
   4   4  -9   13.70    5.40
  -4  -4  -9    4.10    2.60
  -4  -4  -9    6.90    3.60
   4  -4   9    7.70    3.70
   4   4  -9   15.20    3.40
   4   4  -9    8.80    2.60
  -4  -4  -9    9.00    6.70
   4  -4   9    9.60    2.50
  -4  -4  -9   10.60    4.10
   4  -4   9   17.70    7.10
   4   4   9    7.90    3.30
  -4   4  -9    6.00    4.10
  -4  -4   9    5.20    3.80
  -4  -4   9    5.20    4.40
  -4   4  -9    9.40    3.20
  -4  -4   9    5.30    4.60
   5  -4   9   48.50    4.50
   5   4  -9   47.80    5.20
  -5  -4  -9   36.30    5.10
  -5  -4  -9   39.70    5.00
   5   4  -9   44.00    4.90
   5  -4   9   40.00    5.20
   5  -4   9   37.10    9.30
   5   4  -9   31.90    7.60
  -5  -4  -9   29.90    8.60
  -5  -4  -9   63.59    9.10
  -5  -4  -9   45.40    5.70
  -5  -4   9   46.40    6.00
   5   4   9   32.10    5.00
   5  -4  -9   52.29    5.10
   5   4   9   42.30    5.50
  -5   4  -9   29.20    4.90
  -5  -4   9   39.30    5.50
  -5  -4   9   58.39    7.70
  -6  -4  -9   41.60    6.50
   6  -4   9   39.40    5.90
  -6  -4  -9   49.90    5.60
   6   4  -9   49.40    9.10
   6   4  -9   45.30    5.00
   6  -4   9   53.29    5.50
   6  -4   9   50.09   14.10
   6   4  -9   44.10    5.20
  -6  -4  -9   37.20    8.60
   6   4  -9   46.60    5.70
   6  -4   9   44.90    5.00
   6  -4  -9   40.70    6.30
  -6  -4   9   50.19    6.30
   6   4   9   34.60    4.80
  -6   4  -9   50.29    6.10
   6  -4  -9   49.50    4.70
  -7  -4  -9   12.50    2.90
   7  -4   9   13.70    2.70
   7  -4   9    8.20    2.40
  -7  -4  -9   11.60    6.60
   7   4  -9    9.30    2.30
  -7  -4   9   10.00    2.70
  -7   4  -9   10.10    2.50
   7  -4  -9   10.50    2.20
   0  -5   9  335.57   14.70
   0   5  -9  339.37   13.30
   0  -5   9  330.67   12.30
   0   5  -9  347.97   27.70
   1  -5   9   93.29    8.20
   1   5  -9  110.59   18.00
   1   5  -9   98.29    6.60
   1  -5   9  102.99    5.40
   1   5  -9  104.19    6.20
   1   5  -9  104.49   16.00
  -1  -5   9  107.49    7.80
  -1   5  -9  103.39    6.00
  -1  -5   9  107.09    5.50
  -1   5  -9   79.59   16.80
  -2  -5  -9  384.36   14.50
   2   5  -9  333.47   30.50
   2  -5   9  393.06   17.80
   2   5  -9  354.56   38.40
   2  -5   9  388.46   14.10
   2   5  -9  399.96   16.00
   2   5  -9  387.96   14.40
  -2   5  -9  399.06   15.00
  -2  -5   9  396.36   14.30
  -2  -5   9  401.16   16.60
   3   5  -9  341.37   13.90
  -3  -5  -9  359.36   18.70
  -3  -5  -9  340.27   15.30
  -3  -5  -9  352.96   13.50
   3  -5   9  353.26   13.20
   3  -5   9  362.66   15.20
   3   5  -9  356.26   13.30
   3  -5   9  343.97   15.40
   3   5  -9  355.06   15.60
   3  -5   9  352.16   18.50
  -3   5  -9  386.26   13.80
  -3  -5   9  350.16   15.70
  -3  -5   9  358.26   14.40
  -3  -5   9  329.17   16.10
  -3   5  -9  347.37   15.20
  -3  -5   9  337.27   13.60
  -3  -5   9  367.06   15.20
  -3   5  -9  330.37   17.90
   4  -5   9   57.99    6.60
   4  -5   9   60.19    4.90
   4   5  -9   75.89    9.00
  -4  -5  -9   67.29    5.30
   4   5  -9   69.29    5.60
   4   5  -9   57.99    5.80
  -4  -5  -9   62.89    6.30
  -4  -5  -9   58.39    9.50
  -4  -5  -9   59.99    7.30
  -4  -5   9   64.19    8.10
  -4  -5   9   68.49    8.40
  -4  -5   9   73.89    8.30
  -4   5  -9   54.59    7.00
   5  -5   9   30.80    4.90
  -5  -5  -9   46.20    6.30
   5   5  -9   37.10    4.40
  -5  -5  -9   30.30    9.20
   5   5  -9   31.00    4.70
   5  -5   9   44.20    5.80
  -5  -5  -9   43.50    5.20
   5   5  -9   35.20    7.00
   5  -5   9   42.80   17.50
  -5  -5   9   44.10    7.30
  -5  -5   9   40.90    6.10
  -5   5  -9   34.30    5.40
  -5  -5   9   48.10    7.20
   5  -5  -9   38.50    5.20
   6   5  -9  114.79    6.80
   6   5  -9   89.49   13.40
   6  -5   9  103.19    5.90
  -6  -5  -9  105.49    6.50
  -6  -5  -9  106.39   12.30
   6  -5   9  103.09    7.30
   6  -5   9  106.39    6.80
  -6  -5  -9  121.69    7.20
  -6  -5   9   98.89    7.70
  -6   5  -9  119.49    7.30
   6  -5  -9  100.29    6.00
   7  -5   9   36.30    3.50
   7   5  -9   34.60    4.20
  -7  -5  -9   31.30    5.40
   7  -5   9   33.90    3.70
  -7  -5  -9   31.40    4.10
   7  -5  -9   33.00    3.70
  -7  -5   9   30.70    3.70
  -7   5  -9   37.10    4.30
   0  -6   9   25.50    5.80
   0  -6   9   31.00    3.50
   0   6  -9   26.50    4.40
   1  -6   9   10.00    5.70
   1  -6   9   14.80    2.40
   1   6  -9   16.70    5.50
   1   6  -9   17.70    3.70
   1   6  -9   21.00   17.60
   1  -6   9   27.70    5.00
   1   6  -9   13.10    8.10
  -1  -6   9   14.70    2.60
  -1  -6   9   13.40    4.60
  -1   6  -9   14.00    2.90
  -1  -6   9   11.80    4.70
   1   6   9    5.80    5.70
  -1  -6   9   14.60    3.90
  -1   6  -9   16.20    5.50
  -1   6  -9   16.50    4.60
   2   6  -9  788.62   26.60
   2  -6   9  729.33   29.00
   2  -6   9  760.82   24.70
   2  -6   9  673.13   27.00
   2   6  -9  695.03   24.90
   2   6  -9  681.73   28.30
   2  -6   9  691.53   30.60
   2   6  -9  629.24   52.49
  -2  -6   9  696.63   28.60
  -2  -6   9  698.83   26.00
  -2   6  -9  720.23   26.40
  -2   6  -9  695.33   25.60
  -2   6  -9  727.63   28.00
  -2  -6   9  730.53   24.70
  -2  -6   9  750.72   25.40
  -3  -6  -9  348.87   15.70
  -3  -6  -9  351.86   15.50
  -3  -6  -9  378.66   14.10
   3  -6   9  382.96   13.80
   3   6  -9  365.26   14.10
   3  -6   9  355.16   16.00
   3  -6   9  375.06   20.80
   3  -6   9  350.06   15.10
   3   6  -9  376.86   16.10
  -3  -6   9  373.56   15.40
  -3   6  -9  343.87   15.30
  -3  -6   9  362.66   16.90
  -3  -6   9  370.86   14.10
  -3   6  -9  328.57   17.50
  -3  -6   9  355.56   14.50
  -3  -6   9  364.26   17.20
   4   6  -9   25.20    3.60
   4  -6   9   29.30    5.30
  -4  -6  -9   28.00   10.70
   4  -6   9   30.40    4.30
  -4  -6  -9   20.20    3.70
  -4  -6  -9   19.80    4.40
   4   6  -9   29.00    5.90
   4  -6   9   32.30    4.80
  -4  -6  -9   32.70    4.10
  -4   6  -9   31.40    4.80
  -4  -6   9   21.40    5.40
  -4  -6   9   26.70    4.40
  -4  -6   9   28.20    5.90
   5  -6   9   30.50    4.30
   5  -6   9   27.50    4.30
  -5  -6  -9   29.50    3.80
   5   6  -9   32.20    6.70
  -5  -6  -9   30.90   11.10
  -5  -6  -9   38.80    5.80
   5  -6   9   34.70    6.00
  -5  -6  -9   38.80    4.80
  -5  -6   9   41.50    5.80
   5  -6  -9   25.90    4.00
  -5  -6   9   21.10    4.10
  -5  -6   9   27.50    6.10
  -5   6  -9   21.30    4.00
   6   6  -9   73.19    5.80
  -6  -6  -9   60.79    5.10
   6  -6   9   63.29    5.50
  -6  -6  -9   67.09    5.50
   6  -6   9   70.39    5.60
   6  -6   9   62.99    5.80
  -6  -6   9   60.39    6.20
  -6   6  -9   66.49    5.30
   7  -6   9   46.90    3.80
  -7  -6  -9   57.49    4.10
   7  -6   9   46.50    3.70
  -7  -6   9   50.09    4.10
   0  -7   9  625.64   21.50
   0   7   9  602.14   25.00
   0   7  -9  644.24   22.00
   0  -7   9  606.74   22.90
   0   7  -9  576.64   22.80
   0  -7   9  634.64   25.80
   0   7  -9  584.84   24.20
   1  -7   9  533.95   23.70
   1  -7   9  538.85   18.70
   1   7  -9  546.65   19.70
   1   7  -9  510.25   20.40
   1  -7   9  512.45   20.30
   1   7  -9  519.05   21.90
  -1   7   9  456.35   23.10
  -1  -7  -9  514.95   19.20
  -1  -7   9  504.85   20.20
   1   7   9  514.35   22.00
  -1   7  -9  519.55   22.00
  -1   7  -9  569.04   18.60
  -1  -7   9  540.75   18.90
  -1  -7   9  528.05   19.60
  -1   7  -9  536.85   20.60
  -2  -7  -9  117.69    6.60
   2  -7   9   99.29    8.20
   2   7  -9  102.79   10.70
   2  -7   9  116.69   15.00
   2  -7   9  121.99   14.70
   2   7  -9   94.79    7.60
   2  -7   9  110.69    6.10
  -2   7  -9  109.29   10.50
  -2  -7   9   94.09   10.20
  -2   7  -9  100.49    8.10
  -2  -7   9  110.09    6.20
  -2  -7   9  104.79    7.30
  -2  -7   9  102.19    8.00
  -2  -7   9  101.89   12.10
   3  -7   9  219.18    9.40
  -3  -7  -9  201.98   11.40
   3  -7   9  196.98   11.90
   3  -7   9  216.68   10.70
  -3  -7  -9  212.08    9.60
  -3  -7  -9  209.88   11.10
   3   7  -9  218.68   14.80
   3   7  -9  218.08   11.50
  -3  -7   9  199.08   10.80
  -3  -7   9  211.48   13.60
  -3   7  -9  213.48   13.50
  -3  -7   9  225.28   10.00
  -3  -7   9  212.38   10.00
  -3  -7   9  209.48   13.80
  -3   7  -9  210.58   11.20
   4  -7   9  323.87   14.10
   4  -7   9  316.37   14.80
  -4  -7  -9  322.87   13.90
  -4  -7  -9  353.06   14.60
   4   7  -9  307.17   15.60
  -4   7  -9  333.27   14.30
  -4  -7   9  326.37   14.20
  -4  -7   9  338.27   17.00
  -4  -7   9  348.27   16.30
  -4  -7   9  326.27   13.30
   5  -7   9   18.20    4.40
   5  -7   9   10.70    2.80
  -5  -7  -9   -1.10   13.80
  -5  -7  -9    9.60    3.10
  -5  -7  -9   12.00    2.90
   5   7  -9   17.10    6.30
  -5   7  -9   19.00    5.00
  -5  -7   9   10.80    6.80
   5  -7  -9   11.50    3.70
  -5  -7   9   14.80    3.60
  -5  -7   9   14.20    4.70
   6  -7   9   10.60    2.90
  -6  -7  -9    9.00    4.00
   6  -7   9    5.30    2.40
  -6  -7  -9    3.10    2.20
   6   7  -9    1.70    2.50
   6  -7   9    5.70    2.40
  -6   7  -9    5.80    2.60
   6  -7  -9    6.10    2.70
  -6  -7   9    7.50    3.00
   0  -8   9  447.36   16.00
   0  -8   9  444.96   22.40
   0   8  -9  385.86   17.90
   0  -8   9  432.76   17.30
   0   8  -9  410.06   20.50
   0   8   9  430.36   19.20
   0   8  -9  434.76   14.90
  -1  -8  -9  157.18    8.50
  -1   8   9  161.08   13.30
   1   8  -9  159.18    8.20
   1   8  -9  154.68   15.90
   1  -8   9  132.09   17.10
   1  -8   9  160.48    7.50
  -1   8  -9  142.89    9.50
  -1   8  -9  144.19   12.40
  -1  -8   9  148.19   14.10
  -1  -8   9  142.09   11.20
  -1  -8   9  159.38    7.70
  -1  -8   9  149.29    9.10
  -2  -8  -9  113.99    6.90
   2   8  -9  117.09    8.00
  -2  -8  -9   83.89   10.70
   2  -8   9  117.49    8.30
   2  -8   9  117.19    6.40
  -2  -8  -9   95.49   10.50
   2   8  -9  106.19   10.20
  -2  -8   9  105.69   14.70
  -2  -8   9  126.09    7.60
  -2  -8   9  113.99    6.80
  -2   8  -9  117.49    8.10
  -2  -8   9  119.49   12.50
  -2   8  -9  125.39   10.10
  -2  -8   9  110.99    8.40
   3  -8   9   82.89    5.70
   3  -8   9   88.19    7.30
  -3  -8  -9   76.99    7.40
   3   8  -9   90.99    8.00
   3  -8   9   83.79    9.90
  -3  -8  -9   87.59    6.10
  -3  -8  -9   59.79    9.80
   3   8  -9   79.29   10.70
  -3  -8   9   88.49   11.90
  -3  -8   9   91.69    6.70
  -3   8  -9   74.89    7.10
  -3  -8   9   69.69   11.60
  -3  -8   9   75.09    7.10
  -3  -8   9   80.69    6.50
  -3   8  -9   76.39    9.50
   4   8  -9   60.99    8.80
  -4  -8  -9   74.49    6.90
   4  -8   9   67.79    6.70
   4  -8   9   83.39    8.10
   4  -8   9   71.49    5.30
  -4  -8  -9   70.19    5.60
  -4  -8   9   74.69    9.30
  -4  -8   9   65.99    6.50
  -4  -8   9   69.39   11.50
  -4   8  -9   63.19    6.20
  -5  -8  -9   84.89    5.30
   5  -8   9   87.29    5.30
   5  -8   9   81.69    6.00
  -5  -8  -9   78.09    5.50
  -5  -8  -9   88.49    6.10
   5   8  -9   73.19    6.10
   5  -8   9   79.99    7.00
  -5   8  -9   82.69    5.70
  -5  -8   9  104.29    8.00
  -5  -8   9   81.09    6.00
   6  -8   9   10.30    3.50
  -6  -8  -9   12.60    3.30
   6  -8   9    7.40    2.30
  -6  -8   9    5.00    2.90
   0  -9   9   10.20   11.00
   0  -9   9   26.20    4.60
   0   9  -9   12.70    4.90
   0   9  -9   16.60    4.10
   0  -9   9   20.40    3.20
   1   9  -9  182.08   12.00
   1  -9   9  164.68    9.80
   1  -9   9  167.78    8.10
  -1  -9  -9  169.18    8.70
  -1  -9   9  184.08   10.10
  -1  -9   9  154.08   17.40
  -1  -9   9  159.18    8.30
  -1   9  -9  166.68    9.70
  -1   9  -9  166.68   11.70
  -1  -9   9  177.78    9.10
  -2  -9  -9   49.20    6.10
   2  -9   9   34.30    4.80
  -2  -9  -9   48.10    6.70
   2  -9   9   48.20    4.90
   2   9  -9   38.40    6.60
  -2  -9   9   41.30    5.10
  -2   9  -9   33.90    5.80
  -2   9  -9   43.50    6.30
  -2  -9   9   50.89    6.30
  -2  -9   9   34.20    9.50
  -2  -9   9   37.60    5.80
   3   9  -9    6.40    5.20
  -3  -9  -9    5.70    2.70
   3  -9   9    9.80    3.70
   3  -9   9    6.00    2.50
  -3  -9  -9    4.10    3.30
  -3  -9  -9    5.20    3.90
  -3   9  -9   12.60    5.30
  -3  -9   9   -0.30    8.30
  -3  -9   9    4.40    2.70
  -3  -9   9   -3.40    3.60
  -3  -9   9    5.50    3.20
  -3  -9   9    9.10    7.90
  -3   9  -9    9.00    3.30
  -4  -9  -9   14.80    2.80
   4  -9   9   15.90    2.80
  -4  -9  -9   21.80    3.70
  -4  -9  -9   14.80    3.00
   4  -9   9   14.00    3.70
  -4   9  -9   20.70    3.30
  -4  -9   9   18.60    8.70
  -4  -9   9   22.60    3.60
  -4  -9   9   19.00    5.80
  -5  -9  -9  116.79    6.50
   5  -9   9  130.99    5.90
  -5  -9  -9  119.89    6.40
   5  -9   9  132.49    6.60
  -5  -9  -9  129.29    5.90
  -5  -9   9  120.99    6.20
   0 -10   9  291.37   13.00
   0  10  -9  281.47   14.70
   0 -10   9  294.77   11.90
   0 -10   9  292.97   12.30
   0 -10  -9  291.27   12.80
   1 -10   9  289.07   11.50
   1  10  -9  270.97   14.00
  -1 -10  -9  272.27   11.80
   1 -10   9  294.67   12.70
  -1  10  -9  295.67   14.60
  -1 -10   9  221.28   23.40
  -1 -10   9  283.27   11.60
  -1 -10   9  284.77   12.00
  -1 -10   9  278.77   12.90
  -2 -10  -9   36.50    4.90
   2  10  -9   54.79    7.60
   2 -10   9   44.00    6.10
   2 -10   9   40.80    4.40
  -2 -10   9   49.30    5.10
  -2 -10   9   42.40    5.60
  -2  10  -9   43.60    6.10
  -2 -10   9   23.80   12.20
  -2  10  -9   31.50    5.50
  -2 -10   9   43.50    5.30
  -3 -10  -9  139.19    7.20
  -3 -10  -9  142.29    8.80
   3 -10   9  145.19    7.00
  -3 -10  -9  144.89    7.90
   3  10  -9  160.78    9.80
   3 -10   9  141.29    8.30
  -3 -10   9  161.18    8.10
  -3  10  -9  143.19    7.50
  -3  10  -9  138.49   10.10
  -3 -10   9  142.09    7.10
   4 -10   9    2.50    2.60
  -4 -10  -9   10.00    2.80
  -4 -10  -9    4.40    2.10
  -4 -10   9    8.20    2.40
  -5 -10  -9   12.20    1.90
   5 -10   9    7.70    3.60
  -5 -10  -9    8.70    2.20
  -5 -10   9    8.60    2.70
   0 -11   9   48.30    4.80
   0 -11   9   47.40    4.90
   0  11  -9   55.89    7.80
   0 -11   9   53.29    6.00
   0 -11  -9   49.70    6.30
   1 -11   9   25.30    4.20
  -1 -11  -9   23.20    5.00
   1 -11   9   16.90    3.60
  -1 -11  -9   20.60    3.20
   1 -11   9   25.80    3.90
   1  11  -9   25.60    4.60
  -1  11  -9   20.90    4.60
  -1 -11   9   26.20    4.30
  -1 -11   9   22.40    3.20
  -1 -11   9   23.10    3.90
  -2 -11  -9    0.00    2.20
   2  11  -9    2.00    3.50
   2 -11   9    0.70    2.10
  -2 -11  -9    1.30    2.90
   2 -11   9    4.20    2.90
  -2 -11   9   -0.60    2.80
  -2 -11   9    0.90    2.00
  -2  11  -9    5.00    3.60
  -2 -11   9   -1.30    2.50
   3 -11   9   80.79    5.50
  -3 -11  -9   74.29    5.30
   3 -11   9   74.59    5.20
  -3 -11  -9   70.09    9.10
  -3 -11  -9   85.89    5.10
  -3 -11   9   79.69    5.30
  -3 -11   9   79.89    4.80
  -3  11  -9  102.09   11.40
  -4 -11  -9  297.67   11.30
   4 -11   9  303.97   11.50
  -4 -11  -9  322.07   11.00
  -4 -11   9  307.37   11.20
   0 -12   9  109.19    6.10
   0 -12  -9  124.79    7.20
   0 -12   9  121.99    6.60
   0  12  -9  118.09    7.50
   0 -12   9  127.09    6.00
  -1 -12  -9   37.70    5.50
   1 -12   9   35.20    4.70
   1 -12   9   37.60    4.00
   1 -12   9   34.50    3.60
   1  12  -9   40.90    5.30
  -1 -12  -9   34.30    4.40
  -1 -12   9   35.80    4.30
  -1 -12   9   34.10    3.50
  -1 -12   9   34.60    4.40
  -1  12  -9   38.50    5.20
   2 -12   9   13.70    2.40
   2 -12   9   19.00    3.50
  -2 -12  -9   16.00    2.60
   2 -12   9   15.00    2.10
  -2 -12  -9   16.60    3.50
   2  12  -9   15.90    3.30
  -2  12  -9   15.40    4.00
  -2 -12   9   14.70    2.40
  -2 -12   9   14.50    2.40
  -3 -12  -9   23.10    3.10
   3 -12   9   25.60    2.70
  -3 -12   9   29.50    2.90
   0 -13   9   38.00    3.10
   0 -13   9   41.60    3.80
   0  13  -9   35.70    4.00
   1 -13   9   42.50    3.10
   1  13  -9   32.50    3.80
  -1  13  -9   45.40    4.30
  -1 -13   9   39.30    3.60
   0   0  10   96.29    4.30
   0   0  10   98.59   11.40
   0   0  10   94.39   11.60
   0   0 -10  113.29    8.70
   1   0 -10   -0.40    3.80
  -1   0  10   -5.00    6.70
  -1   0 -10    2.60    3.10
  -1   0 -10    1.60    4.60
   1   0  10   11.70    8.50
   1   0 -10    0.40    3.70
   1   0  10    2.00    1.60
   2   0  10  243.38   16.70
  -2   0 -10  272.07   18.50
   2   0  10  247.48   10.30
   2   0 -10  252.87   15.10
  -2   0 -10  241.48   10.70
   2   0 -10  259.87   19.90
   3   0 -10   30.10   10.50
   3   0  10   29.10    4.70
   3   0  10   36.20    5.10
  -3   0 -10   33.80    4.80
   3   0 -10   46.90    4.80
  -3   0 -10   31.40    4.00
   3   0  10   16.30   13.50
  -4   0 -10    6.50    3.60
   4   0 -10   -2.40    5.60
  -4   0 -10    0.20    5.90
  -4   0 -10   -5.00    4.00
   4   0  10   15.80   26.20
   4   0  10    5.90    3.90
   4   0  10    5.90    2.90
  -4   0  10    7.30    4.20
  -4   0 -10    3.70    3.00
  -4   0 -10   -1.20    4.30
   4   0  10    0.50    3.90
   4   0 -10    2.30    2.50
   5   0  10   38.30    6.10
  -5   0  10   34.50    4.90
  -5   0 -10   25.80    5.40
  -5   0 -10   32.20    5.10
   5   0  10   44.70    6.20
  -5   0 -10   37.80    4.50
   5   0  10   40.80    6.80
   5   0 -10   22.40    4.50
  -5   0 -10   29.90    6.10
   5   0 -10   34.40    4.60
  -6   0 -10   23.90    4.30
  -6   0 -10   28.10    6.00
   6   0 -10   25.70    3.70
  -6   0  10   28.30    4.10
  -6   0 -10   31.70    5.40
   6   0  10   29.10    4.10
   6   0  10   25.00    4.60
   6   0 -10   28.70    4.30
   6   0 -10   37.60    5.90
   6   0  10   27.70    6.80
   7   0  10   17.70    3.10
   7   0 -10   15.10    2.40
   7   0 -10   17.00    3.20
   7   0 -10   10.00    2.30
  -7   0 -10   12.20    3.50
  -7   0  10   15.20    2.80
   7   0  10   12.50    3.60
  -8   0 -10   32.50    4.60
   0  -1  10  225.58    8.90
   0   1 -10  210.08   13.00
   0  -1  10  221.38   16.80
   0  -1  10  216.18   16.50
   0   1 -10  220.08    9.50
   0   1  10  210.18   12.70
   0  -1 -10  231.28   11.30
   0   1  10  196.58   12.30
  -1  -1 -10  261.77   14.50
  -1  -1 -10  249.78   11.60
   1   1 -10  299.67   14.90
   1   1 -10  259.87   11.60
   1  -1  10  269.57   20.10
   1  -1  10  273.17   10.60
   1   1 -10  270.37   15.10
  -1   1  10  264.87   13.80
   1   1  10  285.47   14.70
   1   1  10  273.77    9.80
  -1   1 -10  274.77   16.20
   1  -1 -10  288.77   12.70
  -1   1 -10  269.97   11.00
  -1  -1  10  263.57    9.90
   2   1 -10  904.91   32.60
   2   1 -10  957.10   37.00
   2   1 -10  936.01   37.50
  -2  -1 -10  912.21   32.00
   2  -1  10  951.50   38.30
  -2  -1 -10  891.11   38.00
   2  -1 -10  949.80   36.40
   2   1  10  923.01   31.10
  -2   1 -10  923.21   39.00
  -2  -1  10  934.61   30.50
  -2   1 -10  861.71   31.50
   2  -1 -10  933.11   34.10
  -3  -1 -10   76.49    4.80
   3  -1  10   68.09    4.70
   3   1 -10   71.39   13.10
   3   1 -10   74.79   10.70
   3  -1  10   73.99    6.60
  -3  -1 -10   66.89   16.20
  -3  -1 -10   73.99    7.20
   3  -1  10   70.09   15.30
   3   1 -10   70.29    5.10
   3  -1 -10   71.79   11.30
  -3  -1  10   71.89    4.20
  -3   1 -10   69.69   16.20
   3   1  10   67.29    5.70
  -3   1 -10   73.89    6.20
   3   1  10   70.89   17.70
   4  -1  10  130.89   10.00
  -4  -1 -10  146.79   12.20
  -4  -1 -10  149.69    7.00
  -4  -1 -10  132.29    8.90
   4  -1  10  146.69    6.80
   4   1 -10  140.69    7.00
   4  -1  10  139.39    8.50
  -4  -1 -10  130.29   35.60
  -4  -1 -10  138.19    8.20
  -4   1  10  149.88    9.10
   4   1 -10  110.59    9.50
   4   1  10  158.08    9.20
   4   1  10  128.79    8.90
  -4   1 -10  139.49    8.50
   4  -1 -10  141.39   23.70
   4   1  10   71.29   30.10
  -4   1 -10  144.49    9.30
  -4   1 -10  146.69    9.10
  -4   1 -10  143.99   10.00
  -4  -1  10  136.89    8.90
  -4   1 -10  109.99    8.00
   5   1 -10   77.29    6.90
  -5  -1 -10   77.49    9.50
   5   1 -10   74.39    5.50
   5  -1  10   71.99   10.20
  -5   1  10   77.59    7.00
   5  -1  10   91.99    5.90
   5  -1  10   73.39    6.90
  -5  -1 -10   76.49    9.30
  -5  -1 -10   77.79    7.30
  -5  -1 -10   70.39    6.40
  -5  -1  10   79.49    7.30
  -5   1 -10   74.89    8.40
   5  -1 -10   70.39    8.00
   5  -1 -10   74.59    5.60
  -5   1 -10   72.09    7.70
  -5   1 -10   69.39    7.60
   5   1  10   70.49    7.10
   5   1  10   75.49    8.70
   6   1 -10   71.29    5.40
   6   1 -10   76.79    5.80
   6   1 -10   67.49    6.40
  -6  -1 -10   76.69    8.20
  -6   1  10   63.59    6.10
  -6  -1 -10   75.49   10.40
  -6  -1 -10   71.19    6.80
   6  -1  10   63.59    6.80
   6  -1  10   65.29    6.40
   6  -1  10   51.09    8.30
   6   1  10   72.09    6.40
  -6   1 -10   68.79    7.90
  -6   1 -10   84.79    9.30
   6  -1 -10   77.69    7.00
   6  -1 -10   75.49    5.30
  -6  -1  10   77.69    6.80
   6   1  10   73.99    7.60
   6  -1 -10   67.59    6.10
   6   1  10   62.99   10.10
   7  -1  10   34.90    5.20
   7  -1  10   33.10    4.50
  -7  -1 -10   27.80    4.30
   7   1 -10   39.20    4.00
   7   1 -10   31.10    3.70
   7   1 -10   34.40    3.60
   7  -1 -10   39.80    3.90
   7  -1 -10   30.70    3.80
  -7   1 -10   30.50    5.20
   7  -1 -10   37.90    5.20
   7   1  10   32.20    4.90
  -7  -1  10   33.10    4.50
   0  -2  10 2152.98   73.89
   0   2 -10 2282.97   74.19
   0   2  10 2250.67   74.99
   0  -2 -10 2355.36   75.49
   0   2 -10 2332.07   79.29
   0   2  10 2318.17   75.19
   1   2 -10 1338.47   51.39
  -1  -2 -10 1463.95   50.19
   1   2 -10 1404.46   46.50
   1  -2  10 1414.36   46.40
   1  -2  10 1311.87   54.89
   1   2 -10 1410.06   51.19
   1  -2 -10 1440.76   46.60
   1   2  10 1415.96   49.90
  -1  -2  10 1429.36   46.00
  -1   2 -10 1325.87   46.10
  -1   2 -10 1380.26   52.09
   2  -2  10  182.38    9.00
  -2  -2 -10  153.68   16.20
   2   2 -10  195.88   16.90
   2   2 -10  175.58    8.00
  -2  -2 -10  181.58   10.20
   2   2 -10  150.58   22.30
   2  -2 -10  185.08    9.90
  -2  -2  10  180.48    8.00
   2  -2 -10  193.68   13.00
  -2   2 -10  181.58    8.60
   2  -2 -10  190.88   11.10
  -2   2 -10  200.58   19.10
   2   2  10  188.68   16.80
   2   2  10  189.18    7.70
   3   2 -10  400.16   18.20
  -3  -2 -10  425.06   15.30
  -3  -2 -10  427.36   17.90
   3  -2  10  421.46   17.40
   3   2 -10  428.86   15.30
   3  -2  10  440.46   15.10
   3   2 -10  409.76   27.30
   3  -2  10  422.06   29.60
  -3  -2 -10  412.76   31.20
   3   2  10  429.76   16.20
  -3   2 -10  433.86   16.80
   3   2  10  501.05   49.30
  -3  -2  10  431.46   15.80
  -3   2 -10  377.96   34.00
  -3   2 -10  408.06   15.70
  -4  -2 -10   31.40    4.80
  -4  -2 -10   33.90    6.10
   4  -2  10   26.80    5.80
   4  -2  10   24.60    4.50
   4   2 -10   34.00    4.10
   4   2 -10   29.40    4.70
  -4   2  10   30.90    5.10
   4  -2  10   34.40    3.90
  -4  -2 -10   35.60    4.10
  -4  -2 -10   28.40    4.10
  -4  -2 -10   29.50    9.00
   4   2 -10   34.50    7.80
   4   2  10   22.10    4.90
  -4  -2  10   28.70    4.80
  -4   2 -10   28.50    5.50
  -4   2 -10   40.70    5.50
  -4  -2  10   41.80    4.70
  -4   2 -10   30.70    4.60
   4   2  10  -17.20   31.90
   4  -2 -10   37.90   29.80
   4   2  10   24.00    4.20
  -5  -2 -10  210.48   14.00
  -5  -2 -10  215.58   11.40
  -5  -2 -10  226.98   14.00
  -5   2  10  229.38   10.70
   5  -2  10  233.58   15.10
   5   2 -10  226.88   10.00
  -5  -2 -10  228.08   10.40
   5  -2  10  236.68   11.20
  -5  -2 -10  235.78   10.20
   5   2 -10  245.68   10.90
   5   2 -10  201.98   18.10
   5  -2  10  231.58    9.80
   5  -2 -10  233.38   10.00
   5   2  10  238.78   12.70
  -5   2 -10  234.58   12.40
   5  -2 -10  223.38   13.10
  -5   2 -10  235.38   12.10
  -5  -2  10  227.98   11.60
   5   2  10  224.38   11.20
   5  -2 -10  223.58   12.50
   6  -2  10   16.60    3.60
  -6  -2 -10    5.40    3.60
  -6  -2 -10   10.30    6.70
  -6   2  10    9.90    3.50
   6  -2  10    7.80    3.90
   6   2 -10   -1.30   11.20
   6  -2  10   12.30    8.10
  -6  -2 -10    7.70    4.70
   6   2 -10   14.50    3.00
   6   2 -10   10.10    2.60
   6   2 -10    8.60    3.40
   6  -2  10    9.50    3.60
   6   2  10   15.50    3.60
  -6   2 -10   14.90    4.20
   6  -2 -10   14.50    2.90
  -6  -2  10   10.60    3.60
   6  -2 -10   10.20    3.30
   6   2  10   12.70    5.60
   6  -2 -10    2.10    4.10
   7   2 -10    7.80    2.90
   7  -2  10    9.00    2.50
  -7  -2 -10    8.70    3.60
   7   2 -10    6.00    2.40
   7   2 -10    9.50    2.10
   7  -2  10    5.60    2.80
   7  -2 -10    9.70    2.30
   7   2  10    9.00    3.10
  -7  -2  10    6.70    2.60
   7  -2 -10    5.40    3.10
  -7   2 -10    7.90    2.90
   7  -2 -10    6.40    2.20
   0   3 -10  141.19    7.30
   0  -3 -10  156.18    8.80
   0   3 -10  150.18   14.60
   0  -3  10  149.99    7.40
   1   3 -10  889.51   30.90
  -1  -3 -10  911.61   34.80
   1   3 -10  892.71   37.90
   1  -3  10  891.11   31.00
   1   3 -10  908.61   37.30
   1   3  10  849.72   34.20
  -1  -3  10  909.81   30.80
  -1   3 -10  925.01   30.70
  -1   3 -10  879.91   44.10
   2   3 -10   33.50   10.10
  -2  -3 -10   23.70    6.40
   2   3 -10   20.60    2.80
  -2  -3 -10   27.10    9.60
  -2  -3 -10   23.20    3.20
   2   3 -10   40.40   11.10
   2  -3  10   22.50    4.10
   2   3 -10   27.20    4.40
   2  -3  10   27.40    3.40
  -2  -3  10   24.60    4.10
  -2   3 -10    8.10   12.00
  -2   3 -10   26.90    4.20
   2  -3 -10   26.90    3.20
   2   3  10   32.30   11.10
   2  -3 -10   30.00    3.80
   3  -3  10  217.58   30.30
   3   3 -10  183.68    8.10
  -3  -3 -10  185.08    8.20
   3   3 -10  177.28   10.90
   3  -3  10  187.58    8.00
   3   3 -10  187.68   25.40
  -3  -3 -10  176.18   12.00
   3  -3  10  186.48   11.20
  -3  -3 -10  180.68   29.90
   3  -3  10  199.58   14.40
   3   3 -10  199.08   28.40
   3   3  10  199.98    8.70
  -3  -3  10  199.58    9.50
  -3   3 -10  206.28    9.70
  -4  -3 -10   31.10    4.30
   4  -3  10   32.50    7.00
  -4  -3 -10   30.10    4.00
  -4  -3 -10   28.40    6.80
   4  -3  10   28.50    4.00
   4   3 -10   36.60    4.50
   4  -3  10   29.80    4.40
   4   3 -10   33.10    4.10
   4   3 -10   31.90    6.40
  -4  -3 -10   44.10    6.80
  -4  -3  10   14.40    6.20
  -4   3 -10   30.70    8.20
   4  -3 -10   33.80    4.60
  -4   3 -10   32.00    4.70
  -4   3 -10   30.60    5.50
   4   3  10   24.60    5.50
  -4  -3  10   45.50    5.80
   4   3  10   36.10    5.60
  -4  -3  10   35.50    5.40
   5  -3  10   36.40    8.10
  -5  -3 -10   36.00    5.10
  -5  -3 -10   40.80    8.30
   5   3 -10   31.60    4.60
   5  -3  10   40.20    5.90
   5   3 -10   34.60    8.00
  -5  -3 -10   39.60    6.10
   5   3 -10   28.00    3.80
   5  -3  10   33.60    4.50
  -5  -3 -10   38.30    5.50
  -5  -3 -10   26.90    7.50
   5   3  10   27.60    5.00
   5  -3 -10   25.20    3.60
  -5   3 -10   34.20    4.90
   5   3  10   36.10    5.20
  -5   3 -10   37.50    5.60
  -5  -3  10   48.90    6.70
   6  -3  10   95.29    6.60
   6  -3  10  103.79    7.20
  -6  -3 -10   97.19   12.70
   6  -3  10  109.69    7.40
   6  -3  10   67.89   11.40
  -6  -3 -10   90.59   13.20
   6   3 -10  107.09    6.20
   6   3 -10  109.49    6.30
  -6  -3 -10  112.49    7.10
   6  -3 -10   93.09    6.10
  -6  -3  10   85.49    7.40
   6   3  10   96.29    9.90
  -6   3 -10  113.99    8.00
   6  -3 -10  116.49    9.70
   6  -3 -10  103.39    9.50
   7  -3  10   53.79    4.80
   7   3 -10   49.10    4.40
  -7  -3 -10   65.59    5.20
   7  -3  10   53.59    4.40
  -7  -3 -10   47.70    6.50
   7  -3 -10   53.39    6.20
  -7   3 -10   47.80    5.00
   7  -3 -10   50.89    4.10
  -7  -3  10   53.19    4.80
   0  -4  10  529.45   19.70
   0   4 -10  513.45   27.50
   0   4 -10  523.75   19.10
   0  -4  10  523.85   18.10
   1   4 -10  183.18   19.20
   1  -4  10  188.48    9.80
  -1  -4 -10  203.58   14.90
   1  -4  10  195.58    7.90
   1   4 -10  192.58    9.30
   1   4 -10  194.98    8.20
   1   4 -10  183.28   20.10
  -1   4 -10  200.58   25.00
  -1  -4  10  183.18    8.00
  -1   4 -10  193.68    8.80
  -1  -4  10  184.68    9.30
   2   4 -10  225.08   10.90
   2   4 -10  210.08   24.60
   2   4 -10  203.68   25.70
   2   4 -10  209.18    9.00
   2  -4  10  231.48    8.90
  -2  -4 -10  210.58   21.80
   2  -4  10  220.68   11.50
  -2  -4 -10  219.08    9.40
  -2   4 -10  254.27   29.20
  -2  -4  10  229.48    9.80
  -2  -4  10  223.58   10.70
  -2   4 -10  224.78   10.00
   3   4 -10  279.47   11.90
  -3  -4 -10  273.87   13.60
   3   4 -10  294.87   41.50
   3  -4  10  301.17   33.70
   3  -4  10  272.17   10.50
  -3  -4 -10  274.97   13.20
   3   4 -10  254.57   11.10
   3  -4  10  265.37   12.50
   3  -4  10  281.67   14.50
   3   4 -10  288.97   13.60
  -3  -4 -10  275.77   10.80
  -3  -4 -10  213.38   37.40
  -3  -4 -10  280.17   16.60
   3   4 -10  215.08   29.50
  -3   4 -10  272.17   15.30
  -3  -4  10  253.37   13.00
   3   4  10  275.67   10.00
  -3   4 -10  272.07   12.90
  -3  -4  10  279.87   14.00
  -3   4 -10  233.18   14.70
  -4  -4 -10   69.39    7.20
  -4  -4 -10   53.89    4.80
   4   4 -10   59.09    7.90
   4   4 -10   59.89    5.80
   4   4 -10   50.59    4.90
  -4  -4 -10   69.49    6.60
   4  -4  10   61.59    6.40
   4  -4  10   58.39    8.80
   4  -4  10   61.59    4.60
  -4   4 -10   57.09    8.50
  -4   4 -10   51.79    6.50
   4   4  10   60.89    5.80
  -4  -4  10   68.79    6.90
  -4   4 -10   63.39    6.10
  -4  -4  10   52.99    8.00
  -4  -4  10   47.70    7.60
   5   4 -10  164.38    8.10
  -5  -4 -10  162.68    8.40
  -5  -4 -10  152.98    9.20
   5   4 -10  153.98   13.50
   5  -4  10  154.98    9.70
   5  -4  10  161.98    7.70
  -5  -4 -10  145.59   22.00
  -5  -4 -10  148.69    7.90
  -5  -4 -10  149.99   14.40
   5  -4  10  155.38    9.00
   5  -4  10  157.78   16.90
   5   4 -10  160.88    7.90
   5   4  10  157.08    9.20
  -5  -4  10  137.79    9.80
  -5  -4  10  155.28   10.00
   5  -4 -10  155.28    7.90
  -5   4 -10  155.08    9.80
   6  -4  10   66.99    5.60
  -6  -4 -10   59.49    5.80
   6   4 -10   78.39    7.80
   6   4 -10   54.29   10.10
   6  -4  10   63.39   13.50
   6  -4  10   62.09    8.70
  -6  -4 -10   76.09   10.30
   6   4 -10   70.69    6.80
  -6  -4 -10   59.79   10.20
   6   4 -10   68.89    6.10
  -6   4 -10   55.69    8.30
  -6  -4  10   76.79    8.40
   6  -4 -10   72.39    5.10
   6  -4 -10   64.29    6.80
  -7  -4 -10   65.49    5.30
   7  -4  10   68.39    4.50
   7  -4  10   66.09    4.90
  -7  -4 -10   51.39    7.10
   7   4 -10   69.39    4.70
  -7  -4  10   58.49    4.80
   7  -4 -10   64.59    4.40
  -7   4 -10   70.59    4.80
   0   5 -10  224.28   10.00
   0   5 -10  226.18   26.70
   0  -5  10  231.18   11.60
   0  -5  10  213.58    8.90
   1  -5  10   68.29    7.90
   1   5 -10   69.89    5.90
   1   5 -10   61.49   14.40
   1   5 -10   58.59   17.00
   1   5 -10   78.99    5.30
   1  -5  10   65.99    4.40
  -1   5 -10   56.99   23.20
  -1   5 -10   67.89    5.30
  -1  -5  10   66.89    6.90
  -1  -5  10   70.99    4.80
   2  -5  10  118.89    8.50
   2  -5  10  122.29    6.10
   2   5 -10  118.49    6.50
   2   5 -10  124.09    8.10
   2   5 -10  154.88   23.90
   2  -5  10  122.09   10.30
   2   5 -10  157.38   25.40
  -2  -5 -10  112.99    6.70
   2   5 -10  120.39    7.90
  -2   5 -10  130.49   12.80
  -2   5 -10  121.39    8.50
  -2   5 -10  129.29    7.20
  -2  -5  10  129.49    8.00
  -2  -5  10  123.09    8.60
  -2  -5  10  127.09    8.80
  -2  -5  10  126.19    6.80
  -3  -5 -10  582.04   20.70
   3   5 -10  572.14   20.50
   3  -5  10  579.14   22.40
   3   5 -10  578.24   22.90
   3  -5  10  617.34   26.90
   3  -5  10  557.04   21.60
  -3  -5 -10  562.64   22.00
   3  -5  10  595.34   20.50
  -3  -5 -10  589.64   22.50
   3   5 -10  594.24   21.00
  -3  -5  10  565.34   23.00
  -3  -5  10  606.84   23.00
  -3   5 -10  611.74   21.30
  -3   5 -10  538.55   24.10
  -3  -5  10  578.14   21.30
  -3  -5  10  593.14   22.00
  -3   5 -10  578.84   22.10
  -4  -5 -10  114.09    8.60
   4  -5  10  132.39    6.70
  -4  -5 -10  136.89   15.90
  -4  -5 -10  123.69    7.00
   4  -5  10  129.59   15.10
   4   5 -10  115.69    7.30
   4   5 -10  119.09   10.50
   4   5 -10  137.69    7.10
   4  -5  10  128.69    9.00
  -4  -5 -10  129.29    8.10
   4  -5  10  129.89    8.30
  -4  -5  10  117.69    9.70
  -4  -5  10  121.89    9.40
  -4   5 -10  124.69    8.80
  -4  -5  10  125.19    8.80
   5   5 -10   12.20    3.60
  -5  -5 -10    1.70    2.90
  -5  -5 -10    6.50    3.60
   5  -5  10   -1.00    3.50
   5  -5  10    1.50    2.70
   5  -5  10    5.80    3.50
   5   5 -10    0.60    2.50
  -5  -5 -10    7.00    3.00
   5  -5  10   -2.90   10.90
  -5  -5 -10    3.90   12.50
  -5   5 -10   -0.50    3.60
  -5  -5  10    6.40    4.40
  -5  -5  10    4.50    4.40
   5  -5 -10    1.80    3.10
   6  -5  10   23.50    3.20
   6  -5  10   17.40    3.40
   6  -5  10   19.10    3.30
   6   5 -10   35.50    4.70
  -6  -5 -10   28.00    3.90
  -6  -5 -10   24.60    3.30
  -6   5 -10   29.80    4.00
  -6  -5  10   21.00    4.00
   6  -5 -10   25.20    3.20
   7  -5  10  161.08    7.90
  -7  -5 -10  146.09    6.60
   7  -5  10  165.08    8.40
   7   5 -10  147.59    7.00
  -7  -5  10  124.29    7.10
   7  -5 -10  135.99    6.40
  -7   5 -10  146.49    6.30
   0  -6  10   97.99    8.10
   0   6 -10   94.39    8.40
   0  -6  10  103.19    9.30
   0   6 -10  106.29    6.70
   0  -6  10  101.29    5.40
   0   6 -10   87.09   10.00
   1   6 -10  150.68    8.50
   1   6 -10  170.38   13.30
   1  -6  10  125.29    8.90
   1  -6  10  149.59   11.30
   1   6 -10  156.98   23.50
   1   6 -10  172.48   10.00
   1  -6  10  166.28    9.40
  -1  -6  10  151.48   10.10
  -1  -6  10  138.69    7.40
  -1   6 -10  153.18   11.40
  -1  -6  10  142.79    9.10
  -1   6 -10  145.49    7.80
  -1   6 -10  141.59    9.30
  -1  -6  10  145.69    8.80
  -2  -6 -10    9.50    3.10
   2  -6  10    7.60    2.30
   2  -6  10   10.50    4.30
   2   6 -10    8.10    6.70
   2   6 -10    8.30    3.60
   2  -6  10   10.80    5.50
   2  -6  10    8.60    6.90
  -2  -6  10   16.70    7.20
  -2   6 -10    5.10    4.30
  -2   6 -10   11.30    5.70
  -2   6 -10    9.00    2.90
  -2  -6  10    7.00    2.70
  -2  -6  10   12.60    4.50
  -2  -6  10   11.80    4.40
  -2  -6  10   10.40    3.50
   3  -6  10   36.20    5.30
  -3  -6 -10   44.30    4.80
  -3  -6 -10   42.20    5.70
   3   6 -10   40.30    5.60
   3  -6  10   35.70    9.10
   3  -6  10   42.80    4.40
   3  -6  10   40.00    6.30
   3   6 -10   40.90    6.90
  -3  -6 -10   47.90    7.70
  -3  -6  10   43.80    6.40
  -3  -6  10   44.00    6.60
  -3   6 -10   40.20    5.80
  -3   6 -10   52.19    4.30
  -3  -6  10   40.30    6.60
  -3   6 -10   47.20    7.20
  -3  -6  10   53.39    7.80
  -3  -6  10   45.60    6.60
  -4  -6 -10   15.70    3.20
   4   6 -10   15.30    5.10
  -4  -6 -10   12.80   12.10
   4  -6  10   11.60    2.80
  -4  -6 -10   15.10    3.60
   4  -6  10   20.40    4.30
   4  -6  10   21.50    4.30
  -4  -6 -10   12.20    4.10
   4   6 -10   19.30    3.30
  -4  -6  10   16.90    5.40
  -4   6 -10   18.00    4.30
  -4  -6  10   13.90    4.10
  -4   6 -10   32.90    7.00
  -4  -6  10   18.30    5.40
   5  -6  10   28.40   14.00
   5   6 -10   10.70    6.50
   5  -6  10    9.70    2.70
  -5  -6 -10    9.30   11.90
  -5  -6 -10   14.50    3.00
  -5  -6 -10    6.20    2.80
   5  -6  10   11.60    3.60
  -5  -6 -10    8.90    3.50
   5  -6  10    6.90    3.60
  -5   6 -10    6.40    3.40
  -5  -6  10    3.40    5.90
  -5  -6  10   13.70    3.90
  -5  -6  10    9.10    4.20
   5  -6 -10   14.40    3.70
   6   6 -10   86.49    5.40
  -6  -6 -10   71.29    5.40
  -6  -6 -10   75.29    5.10
   6  -6  10   75.39    5.60
   6  -6  10   66.29    6.00
   6  -6 -10   75.19    5.30
  -6   6 -10   81.99    5.60
  -6  -6  10   67.29    6.30
   7  -6  10   44.50    3.50
   7  -6  10   50.89    3.90
  -7  -6  10   49.40    3.80
   0  -7  10   27.30    4.90
   0  -7  10   27.80    3.90
   0   7 -10   39.60    6.80
   0   7 -10   41.90    4.90
   0   7 -10   32.90    5.90
   1   7 -10  267.27   13.20
   1   7 -10  278.77   12.10
   1  -7  10  262.37   10.70
   1  -7  10  266.07   12.70
   1   7 -10  271.27   14.80
  -1  -7  10  277.07   15.00
  -1  -7  10  279.87   11.00
  -1   7 -10  260.47   14.30
  -1   7 -10  262.77   13.00
  -1  -7  10  273.47   12.50
  -1  -7  10  216.88   17.80
  -1  -7  10  277.07   11.90
  -1   7 -10  283.67   11.20
   2   7 -10  136.29   11.60
   2  -7  10  131.79    8.90
   2  -7  10  135.99   15.10
   2  -7  10  144.19    7.00
   2   7 -10  142.29    8.90
   2  -7  10  127.89   10.80
  -2  -7 -10  127.29    7.40
  -2  -7  10  122.59   12.00
  -2   7 -10  138.69    9.20
  -2  -7  10  134.79    7.20
  -2   7 -10  147.99   11.10
  -2  -7  10  151.18   11.50
  -2  -7  10  131.09    8.10
  -2  -7  10  144.09    9.00
   3  -7  10  116.79   18.00
   3  -7  10  109.29    6.40
  -3  -7 -10   97.49    8.50
   3   7 -10  116.79   12.80
  -3  -7 -10   98.49    8.80
   3  -7  10  110.19    9.20
  -3  -7 -10  117.99    6.80
   3   7 -10  123.19    9.10
   3  -7  10  116.59    8.30
  -3  -7  10  105.79    7.70
  -3  -7  10  109.79   11.00
  -3  -7  10  123.79   10.90
  -3  -7  10  113.49    7.40
  -3  -7  10  116.49    8.10
  -3   7 -10  123.89    8.50
  -4  -7 -10   39.40    6.60
   4  -7  10   34.10    4.50
  -4  -7 -10   33.60    4.80
   4  -7  10   44.30    6.90
   4   7 -10   24.80    7.60
   4  -7  10   24.80    4.10
  -4  -7 -10   35.60    5.70
  -4  -7  10   40.30    6.60
  -4  -7  10   37.20    6.20
  -4   7 -10   21.20    6.20
  -4   7 -10   26.60    4.40
   5  -7  10    7.60    2.50
  -5  -7 -10    9.40    3.30
   5  -7  10    4.20    3.00
  -5  -7 -10    3.40    2.70
   5   7 -10   17.10    6.50
  -5  -7 -10    0.90    2.60
   5  -7  10    0.90    3.40
   5  -7 -10    5.10    3.70
  -5  -7  10    0.60    6.90
  -5   7 -10   11.60    3.40
  -5  -7  10    9.10    3.60
  -5  -7  10    8.30    4.10
   6  -7  10   36.40    4.10
   6  -7  10   27.50    3.30
  -6  -7 -10   30.80    3.90
   6   7 -10   35.10    4.50
  -6  -7 -10   38.90    4.70
   6  -7  10   31.20    4.40
  -6   7 -10   40.20    4.50
  -6  -7  10   32.30    4.90
   6  -7 -10   32.10    4.60
   0   8 -10  108.99   11.00
   0  -8  10  113.89    6.60
   0   8 -10  114.89    8.40
   0  -8  10  115.19    9.70
   0   8 -10  109.39    6.60
   0  -8  10  107.89   13.10
   1  -8  10  255.17   12.00
   1  -8  10  248.08   18.70
   1   8 -10  253.17   13.90
   1  -8  10  244.98   10.50
  -1  -8 -10  250.37   11.10
   1   8 -10  260.87   11.40
  -1   8 -10  246.68   12.00
  -1  -8  10  247.38   12.10
  -1  -8  10  240.88   11.30
  -1  -8  10  236.38   16.30
  -1  -8  10  254.07   10.70
  -1   8 -10  255.27   14.00
  -2  -8 -10  293.87   11.60
   2  -8  10  269.67   12.60
   2   8 -10  281.07   12.70
  -2  -8 -10  226.88   15.20
   2  -8  10  280.27   11.30
   2   8 -10  273.37   14.90
   2  -8  10  240.98   21.60
  -2  -8  10  276.07   16.50
  -2   8 -10  267.87   12.70
  -2   8 -10  295.17   14.80
  -2  -8  10  287.67   12.00
  -2  -8  10  281.87   11.60
  -2  -8  10  282.97   12.90
  -2  -8  10  242.48   17.10
   3   8 -10  299.87   15.60
   3  -8  10  307.47   12.30
  -3  -8 -10  304.87   13.40
  -3  -8 -10  307.17   13.80
  -3  -8 -10  319.27   13.10
   3  -8  10  288.87   14.70
   3  -8  10  302.97   13.40
   3   8 -10  289.77   13.80
  -3  -8  10  282.47   13.50
  -3  -8  10  284.77   16.80
  -3  -8  10  309.57   12.50
  -3   8 -10  267.17   15.00
  -3  -8  10  305.97   16.00
  -3   8 -10  294.97   13.30
   4   8 -10   10.80    5.40
  -4  -8 -10   20.10    3.50
   4  -8  10   23.60    4.20
   4  -8  10   20.80    3.10
  -4  -8 -10   22.50    4.10
  -4  -8 -10   23.80    3.40
  -4  -8  10   12.90    7.00
  -4   8 -10   23.10    3.90
  -4  -8  10   23.50    6.70
  -4   8 -10   17.80    8.50
  -4  -8  10   17.70    3.60
  -5  -8 -10   99.39    5.70
   5   8 -10   97.09    6.50
   5  -8  10   98.69    7.20
  -5  -8 -10  109.19    6.50
   5  -8  10  100.19    5.50
   5  -8  10  102.59    6.50
  -5  -8 -10   94.49    5.90
  -5  -8  10  108.79    8.10
  -5  -8  10   94.49    6.40
  -5   8 -10  113.89    6.10
  -6  -8 -10   11.40    2.20
   6  -8  10   16.30    2.40
  -6  -8  10    6.00    2.80
   0   9 -10   16.30    4.90
   0  -9  10   12.60    9.50
   0  -9  10    7.30    3.80
   0   9 -10   11.90    4.00
   0  -9  10    6.60    3.40
   0  -9  10   10.50    2.70
   1  -9  10   48.10   12.80
   1   9 -10   47.70    8.40
  -1  -9 -10   30.10    4.10
   1  -9  10   34.70    4.50
   1  -9  10   30.70    4.70
  -1   9 -10   44.70    6.30
  -1  -9  10   24.70    4.40
  -1   9 -10   48.10    8.40
  -1  -9  10   37.20    5.30
  -1  -9  10   14.10    9.30
  -1  -9  10   34.60    4.80
   2  -9  10    7.00    3.80
   2   9 -10    2.40    4.50
  -2  -9 -10   13.40    4.90
   2  -9  10    9.40    3.00
  -2  -9 -10    5.50    3.10
  -2  -9  10    7.30    3.00
  -2  -9  10    6.70    3.60
  -2  -9  10   10.40    3.40
  -2   9 -10   11.80    4.80
  -2   9 -10   12.00    3.90
  -2  -9  10   12.40   13.40
   3  -9  10  220.88    9.50
   3   9 -10  210.08   13.00
  -3  -9 -10  225.98    9.80
  -3  -9 -10  234.78   10.70
  -3  -9 -10  225.58   11.20
   3  -9  10  222.68   10.70
  -3  -9  10  227.58   10.80
  -3   9 -10  229.08   10.50
  -3  -9  10  203.28   14.10
  -3  -9  10  214.88    9.70
  -3  -9  10  191.48   16.60
  -3   9 -10  230.08   12.60
  -4  -9 -10   13.80    2.80
   4  -9  10   15.70    3.30
   4  -9  10   13.50    2.60
  -4  -9 -10   17.90    3.60
  -4  -9 -10   10.70    2.70
  -4   9 -10   13.00    3.10
  -4  -9  10   14.10    3.00
  -4  -9  10   20.90    5.40
  -5  -9 -10  132.59    6.50
  -5  -9 -10  126.69    5.90
  -5  -9 -10  116.19    6.30
   5  -9  10  134.09    6.60
   5  -9  10  136.39    6.10
  -5  -9  10  103.39    8.60
  -5  -9  10  127.59    8.40
   0 -10  10  180.58   24.90
   0 -10  10  191.28   10.00
   0  10 -10  194.28   11.90
   0 -10  10  187.38    8.70
   0 -10  10  172.98    8.90
   1 -10  10   35.00    5.70
  -1 -10 -10   24.60    3.70
   1 -10  10   21.60    3.30
   1  10 -10   20.60    4.90
  -1 -10  10   15.30    3.00
  -1 -10  10   16.90    3.20
  -1 -10  10   19.30   11.40
  -1  10 -10   21.50    5.20
  -1 -10  10   24.10    4.30
  -1  10 -10   12.90    3.60
   2  10 -10   58.89    8.00
   2 -10  10   56.29    6.20
  -2 -10 -10   61.39    5.20
  -2 -10 -10   68.49    7.80
   2 -10  10   62.39    5.00
  -2 -10  10   54.19    5.60
  -2 -10  10   61.59    6.10
  -2 -10  10   63.69   12.20
  -2  10 -10   55.49    5.80
  -2 -10  10   53.09    5.10
  -2  10 -10   56.59    7.60
   3 -10  10   72.49    5.10
   3 -10  10   76.99    6.30
  -3 -10 -10   75.69    6.20
  -3 -10 -10   72.59    5.30
   3  10 -10   79.89    7.90
  -3 -10 -10   90.49    8.00
  -3 -10  10   81.49    5.40
  -3 -10  10   82.59    6.00
  -3  10 -10   78.79    8.40
  -3  10 -10   79.39    5.70
   4 -10  10   79.19    4.90
  -4 -10 -10   87.59    5.00
   4 -10  10   88.19    5.70
  -4 -10 -10   85.59    5.20
  -4 -10 -10   85.29    5.80
  -4 -10  10   99.79   10.10
  -4 -10  10   82.29    5.20
  -5 -10 -10   50.19    3.80
  -5 -10 -10   50.69    3.40
   0 -11  10   22.30    3.20
   0 -11  10   16.50    2.90
   0 -11  10   20.60    3.50
   0  11 -10   25.10    4.50
   0 -11 -10   25.20    4.20
   1  11 -10   40.80    6.40
  -1 -11 -10   29.20    4.70
  -1 -11 -10   28.80    5.50
   1 -11  10   31.50    4.20
   1 -11  10   33.40    4.20
   1 -11  10   37.70    4.30
  -1  11 -10   28.40    4.60
  -1 -11  10   40.90    4.40
  -1 -11  10   41.30    4.60
  -1 -11  10   31.20    4.20
  -2 -11 -10    8.90    2.50
   2 -11  10   12.90    2.40
   2 -11  10   12.50    2.40
  -2 -11 -10   11.00    3.30
   2  11 -10   14.80    4.10
   2 -11  10   16.70    3.20
  -2  11 -10    8.80    3.60
  -2 -11  10   16.50    2.60
  -2 -11  10   12.30    3.00
  -2 -11  10   17.40    3.80
  -3 -11 -10   10.60    2.40
  -3 -11 -10   11.60    4.00
  -3 -11 -10   11.90    2.40
   3 -11  10   11.10    2.70
   3 -11  10   15.80    2.40
  -3 -11  10    7.30    2.30
  -3  11 -10   10.00    4.60
   4 -11  10  119.19    6.20
  -4 -11 -10  132.29    5.50
   4 -11  10  130.39    5.40
  -4 -11  10  129.39    5.50
   0  12 -10   27.10    4.80
   0 -12 -10   21.40    4.00
   0 -12  10   29.30    4.20
   0 -12  10   22.40    3.40
   0 -12  10   25.40    3.00
  -1 -12 -10    6.40    2.70
   1 -12  10    5.20    2.40
   1 -12  10    1.80    2.20
  -1 -12 -10   -4.20    3.40
   1 -12  10    2.20    1.80
   1  12 -10    7.60    3.10
  -1 -12  10    2.20    1.80
  -1 -12  10    2.70    2.90
  -1 -12  10    3.40    2.20
  -1  12 -10    6.50    3.10
   2  12 -10    8.30    4.70
  -2 -12 -10    6.90    2.40
  -2 -12 -10   11.70    2.50
   2 -12  10   13.40    2.70
   2 -12  10   12.60    2.00
   2 -12  10   14.20    2.50
  -2  12 -10    8.50    3.30
  -2 -12  10    8.50    2.20
  -2 -12  10   12.60    2.10
  -3 -12 -10   22.40    3.10
   3 -12  10   22.70    2.40
  -3 -12  10   31.00    2.80
   0  13 -10    2.10    2.30
   0 -13  10    0.70    1.70
   0 -13  10    0.10    2.10
   1 -13  10   44.10    3.00
   1  13 -10   42.20    4.00
  -1 -13  10   46.70    3.50
   0   0 -11   -2.40    4.40
   0   0  11   -3.50    8.00
   1   0 -11  165.48   11.30
   1   0 -11  181.68   11.50
  -1   0 -11  175.38    8.80
  -1   0 -11  176.58   12.90
   1   0  11  171.38    7.20
   2   0  11  594.14   20.60
  -2   0 -11  562.84   21.10
  -2   0 -11  556.94   28.30
   2   0 -11  549.54   25.20
   2   0 -11  579.84   25.80
  -2   0 -11  561.24   19.70
   2   0  11  590.24   28.60
   2   0 -11  605.04   31.10
  -3   0 -11   32.10   15.90
  -3   0 -11   11.90    3.90
   3   0  11    6.50    3.20
   3   0 -11   13.00    3.20
   3   0  11    3.50   14.10
   3   0 -11   26.90   11.20
  -3   0 -11    6.80    2.30
  -4   0 -11   48.10    6.70
  -4   0 -11   50.89    6.20
   4   0 -11   47.80    4.90
   4   0  11   42.40    6.40
  -4   0  11   62.49    6.90
   4   0  11   50.59    6.60
  -4   0 -11   53.89    7.30
   4   0 -11   37.50    6.10
   4   0  11   53.39    6.80
  -4   0 -11   58.09    5.00
  -4   0 -11   63.39    9.50
   5   0 -11    1.20    4.00
   5   0  11    6.80    3.80
   5   0  11   10.80    4.40
  -5   0 -11    7.70    4.80
  -5   0  11    3.60    3.90
  -5   0 -11    8.80    5.20
  -5   0 -11    6.30    3.60
  -5   0 -11   10.70    4.10
   5   0 -11    4.20    2.60
   5   0  11    6.90    5.50
  -6   0 -11  225.58   12.00
   6   0  11  217.88   10.50
   6   0 -11  219.78   10.60
   6   0 -11  219.58    9.70
  -6   0 -11  199.08   13.00
   6   0  11  238.58   14.60
   6   0  11  213.58   11.00
  -6   0 -11  230.98   10.80
   6   0 -11  217.08   10.10
  -6   0  11  221.68   10.30
   7   0 -11   64.69    4.40
   7   0  11   56.69    5.20
   7   0 -11   66.19    5.30
   7   0 -11   61.59    4.50
  -7   0  11   61.19    4.70
   7   0  11   60.89    6.10
  -7   0 -11   66.29    6.30
   0  -1  11 1423.76   47.50
   0   1 -11 1426.56   48.20
   0   1  11 1479.45   51.29
   0  -1 -11 1493.25   50.79
   0   1 -11 1457.15   52.69
  -1   1  11  484.05   21.30
  -1  -1 -11  527.35   22.50
   1   1 -11  478.55   21.40
  -1  -1 -11  458.15   18.40
   1   1 -11  455.95   18.40
   1  -1  11  485.65   17.40
   1   1 -11  478.75   22.30
  -1   1 -11  500.65   23.60
  -1  -1  11  486.55   16.80
   1   1  11  491.55   16.50
  -1   1 -11  495.45   18.00
   1  -1 -11  476.35   19.80
   1   1  11  540.55   22.40
   2  -1  11  763.12   33.10
   2   1 -11  713.83   31.10
   2   1 -11  701.63   31.90
   2   1 -11  688.93   26.80
  -2  -1 -11  725.93   33.10
  -2  -1 -11  627.84   28.60
  -2  -1 -11  715.03   24.50
   2  -1 -11  750.62   28.40
   2  -1 -11  764.72   29.30
  -2   1 -11  784.72   34.70
  -2  -1  11  720.33   24.10
   2   1  11  767.92   33.60
  -2   1 -11  705.43   24.40
   2  -1 -11  712.93   31.90
  -2   1 -11  717.33   25.60
   2   1  11  745.93   25.00
   3   1 -11  540.75   18.50
   3  -1  11  544.75   20.30
  -3  -1 -11  541.75   20.70
   3  -1  11  543.65   33.00
  -3  -1 -11  551.14   36.00
   3  -1  11  522.75   18.20
  -3  -1 -11  537.15   18.40
   3   1 -11  504.65   30.40
   3   1  11  472.85   32.50
   3   1  11  543.65   19.70
  -3  -1  11  487.95   16.90
   3  -1 -11  458.15   18.70
  -3   1 -11  558.24   20.30
   3  -1 -11  523.85   27.10
  -3   1 -11  443.76   37.30
  -4  -1 -11  332.77   14.90
  -4  -1 -11  341.87   17.50
  -4  -1 -11  368.76   16.70
  -4  -1 -11  351.26   13.30
  -4  -1 -11  353.16   14.20
   4   1 -11  345.97   15.20
   4  -1  11  343.97   14.50
   4  -1  11  357.86   13.20
  -4  -1 -11  322.17   45.40
  -4   1  11  352.56   14.80
   4   1 -11  355.56   13.50
   4  -1  11  369.26   16.20
  -4   1 -11  361.76   14.20
   4   1  11  357.16   16.00
  -4  -1  11  344.97   15.10
  -4   1 -11  377.56   15.80
   4  -1 -11  345.97   13.50
  -4   1 -11  311.47   14.20
   4   1  11  364.16   15.50
  -4   1 -11  354.36   15.00
   4   1  11  341.37   14.80
  -4   1 -11  348.47   16.10
  -5  -1 -11   38.10    5.50
   5  -1  11   31.60    4.50
  -5  -1 -11   32.00    6.20
   5   1 -11   42.60    4.80
  -5  -1 -11   43.30    6.40
  -5  -1 -11   43.00    7.00
  -5   1  11   45.10    6.40
   5  -1  11   36.70    5.60
   5   1 -11   38.30    6.20
   5  -1  11   37.10    7.20
   5  -1 -11   35.70    4.70
  -5   1 -11   44.90    7.70
   5   1  11   35.20    5.50
   5   1  11   48.20    7.90
  -5  -1  11   31.60    4.70
  -5   1 -11   40.90    6.30
  -5   1 -11   32.60    4.80
   5  -1 -11   54.09    7.60
   5   1  11   34.80    4.60
   6   1 -11   20.90    3.20
  -6  -1 -11   22.20    4.00
   6   1 -11   12.00    3.40
  -6  -1 -11   23.40    6.30
  -6  -1 -11    7.00    4.70
   6  -1  11   16.80    3.40
   6  -1  11   18.90    7.40
   6   1 -11   14.60    3.00
   6  -1  11   21.80    4.30
  -6   1  11   14.60    3.50
   6  -1 -11   15.90    3.80
  -6   1 -11   30.20    5.80
   6  -1 -11   14.80    2.90
  -6  -1  11   27.30    4.00
   6   1  11   23.30    3.80
   6  -1 -11   27.00    4.00
  -6   1 -11   23.50    4.80
   6   1  11   12.70    5.90
   7  -1  11   10.10    2.60
   7   1 -11   10.30    2.70
   7  -1  11   14.70    3.20
   7   1 -11   12.20    2.20
  -7  -1 -11    6.10    3.40
  -7  -1  11    9.40    2.60
  -7   1 -11   12.30    3.30
   7  -1 -11   18.30    3.10
   7  -1 -11    8.50    2.20
   7  -1 -11   11.00    2.30
   7   1  11   10.10    2.90
   0   2 -11  718.33   25.40
   0   2  11  696.33   30.90
   0  -2 -11  744.53   27.10
   0   2  11  744.13   27.40
   0  -2  11  737.73   25.00
   0   2 -11  715.73   30.80
   1  -2  11  579.44   20.00
   1   2 -11  568.44   25.60
   1   2 -11  553.84   20.30
  -1  -2 -11  544.25   24.10
   1   2 -11  555.54   26.10
  -1  -2  11  558.74   19.50
  -1   2 -11  541.25   26.20
   1  -2 -11  565.24   20.70
  -1   2 -11  532.25   19.80
   1   2  11  491.85   30.40
  -2  -2 -11  142.49   10.10
   2  -2  11  153.78    6.80
  -2  -2 -11  145.39    7.00
  -2  -2 -11  148.99   16.60
   2   2 -11  150.58   16.40
   2   2 -11  148.89    7.00
   2   2 -11  128.39   22.00
   2  -2  11  145.59    8.20
   2   2 -11  145.89    9.00
   2  -2 -11  132.69   10.50
   2   2  11  165.28   17.70
  -2   2 -11  145.39    7.80
   2  -2 -11  149.29   13.20
   2   2  11  151.38    6.60
  -2   2 -11  158.58   19.70
  -2   2 -11  146.59    7.00
  -2  -2  11  158.28    7.20
  -3  -2 -11  514.25   20.90
   3  -2  11  552.34   20.70
   3   2 -11  496.85   21.30
  -3  -2 -11  466.95   35.50
   3  -2  11  528.65   18.10
   3   2 -11  486.25   31.20
  -3  -2 -11  524.25   18.30
   3   2 -11  530.45   34.30
   3   2 -11  492.75   18.30
   3  -2  11  523.35   34.80
   3   2  11  466.55   36.60
   3   2  11  547.25   19.20
  -3  -2  11  533.65   18.70
  -3   2 -11  547.35   20.10
  -3   2 -11  515.45   18.50
   3  -2 -11  514.15   25.20
  -3   2 -11  456.95   40.60
   4  -2  11   17.90    5.20
  -4  -2 -11   24.60    3.90
   4   2 -11   21.90    4.40
  -4  -2 -11   21.50    6.00
  -4   2  11   25.80    5.00
  -4  -2 -11   21.60    3.70
   4  -2  11   23.00    4.30
  -4  -2 -11   20.60    4.30
  -4  -2 -11    7.30    9.30
   4   2 -11   22.90    8.20
   4  -2  11   23.00    3.00
   4   2 -11   17.20    3.00
  -4  -2  11   17.10    4.40
   4   2  11   16.10    5.10
  -4   2 -11   17.60    4.50
   4   2  11   23.00    4.30
   4  -2 -11   21.90    3.90
  -4   2 -11   33.50    6.10
  -4   2 -11   24.80    4.60
   5  -2  11   48.10    8.10
  -5  -2 -11   34.10    5.00
  -5  -2 -11   34.10    7.30
  -5   2  11   30.20    4.30
  -5  -2 -11   33.20    5.20
  -5  -2 -11   31.50    4.10
   5   2 -11   22.70   10.30
   5   2 -11   31.30    4.40
  -5  -2 -11   25.20    6.60
   5  -2  11   29.50    4.40
   5   2 -11   37.10    5.70
   5  -2  11   27.20    3.60
   5  -2 -11   30.10    3.60
   5   2  11   29.00    5.40
  -5  -2  11   26.00    4.70
   5   2  11   32.00    4.70
  -5   2 -11   27.30    5.40
  -5   2 -11   27.60    5.30
   5  -2 -11   40.70    6.10
   6  -2  11   53.89    9.50
   6   2 -11   65.89    5.20
   6  -2  11   72.69    6.70
  -6  -2 -11   55.79    8.00
  -6  -2 -11   48.40    6.30
   6   2 -11   75.09   21.40
   6  -2  11   58.69    5.90
   6   2 -11   59.19    5.30
  -6  -2  11   54.49    6.30
   6   2  11   63.79    6.60
  -6   2 -11   65.49    7.20
   6   2  11   57.69    9.50
   6  -2 -11   63.09    5.00
   6  -2 -11   69.29    6.20
   7   2 -11  145.79    7.10
   7  -2  11  154.68    7.20
   7   2 -11  156.88    6.60
  -7  -2 -11  159.48    9.10
   7  -2  11  151.48    7.70
   7   2 -11  154.38    7.30
  -7   2 -11  153.88    7.90
  -7  -2  11  152.08    7.20
   7  -2 -11  147.49    8.30
   7  -2 -11  160.98    7.00
   0   3 -11   14.80    8.30
   0  -3 -11    7.80    4.20
   0  -3  11    4.30    2.40
   0   3 -11   11.90    2.90
  -1  -3 -11  389.16   19.70
   1   3 -11  366.96   21.20
   1   3 -11  361.16   14.80
   1   3 -11  371.56   22.90
   1   3 -11  370.26   13.60
   1  -3  11  383.56   14.90
  -1   3 -11  345.97   22.70
  -1   3 -11  384.76   14.60
   1   3  11  371.06   20.00
  -1  -3  11  382.66   14.60
   2   3 -11  431.16   18.30
  -2  -3 -11  457.15   26.90
   2  -3  11  450.35   15.60
   2  -3  11  443.46   17.60
  -2  -3 -11  431.06   15.80
   2   3 -11  412.56   27.50
   2   3 -11  452.35   15.90
   2   3 -11  434.76   28.40
  -2  -3  11  460.95   16.90
  -2   3 -11  436.46   16.00
  -2   3 -11  477.45   30.80
   2   3  11  407.56   27.00
  -2   3 -11  445.06   16.90
   3   3 -11   22.00    4.00
   3  -3  11   13.60    2.50
   3   3 -11  -16.10   17.50
   3  -3  11   -3.50   19.10
   3  -3  11   16.00    4.80
   3   3 -11   17.50    2.70
   3   3 -11   -7.30   19.10
   3   3 -11   18.00    5.40
  -3  -3 -11   24.40   20.20
  -3  -3 -11   22.90    6.10
   3  -3  11   14.60    4.30
  -3  -3 -11    6.20    5.30
   3  -3  11   16.80    4.80
  -3  -3 -11   16.10    2.80
   3   3  11   17.20    3.00
  -3   3 -11   15.30    5.80
  -3   3 -11   15.30    3.70
   3  -3 -11   19.70    8.80
  -3  -3  11   21.90    5.40
  -3  -3  11   11.40    3.20
   4   3 -11  206.08    9.00
  -4  -3 -11  202.18    9.10
  -4  -3 -11  190.08    9.80
  -4  -3 -11  207.18   13.80
   4  -3  11  209.48    8.80
  -4  -3 -11  186.78   10.40
   4  -3  11  223.48   13.80
   4   3 -11  200.28    9.90
   4   3 -11  198.28   13.60
   4  -3  11  189.48   10.00
  -4  -3  11  201.88   11.00
  -4   3 -11  218.88   10.80
   4   3  11  201.38   10.10
   4  -3 -11  207.68   10.10
   4   3  11  175.38   11.80
  -4   3 -11  177.48   14.00
  -4  -3  11  208.38    9.90
  -4   3 -11  212.08   11.50
   5  -3  11  156.18   14.10
  -5  -3 -11  143.39    7.60
  -5  -3 -11  142.69   13.40
   5  -3  11  156.18    7.50
   5   3 -11  138.89    7.40
  -5  -3 -11  122.49   13.80
  -5  -3 -11  139.89    8.10
   5   3 -11  140.19    8.20
   5   3 -11  156.18   15.10
   5  -3  11  140.39    8.80
  -5  -3 -11  149.29    9.00
   5  -3  11  147.59    9.20
  -5  -3  11  158.98    9.40
   5  -3 -11  149.09    7.70
   5   3  11  132.79    9.50
  -5   3 -11  146.69    9.90
   5   3  11  132.89    9.40
  -5   3 -11  140.49    9.60
   6  -3  11   74.09    6.00
  -6  -3 -11   72.49    6.10
   6  -3  11   61.69   11.20
   6  -3  11   47.20    6.30
   6   3 -11   54.19   12.50
   6  -3  11   65.19    6.30
   6   3 -11   62.79    5.20
  -6  -3 -11   68.39    6.20
   6   3 -11   68.49    5.00
  -6  -3 -11   59.09    9.00
  -6  -3 -11   69.79    9.10
   6  -3 -11   59.19    5.00
   6  -3 -11   60.29    6.30
  -6   3 -11   64.09    6.70
   6   3  11   70.99    9.60
   6   3  11   80.09    6.90
  -6  -3  11   75.89    6.60
   7  -3  11   10.60    2.30
   7   3 -11   15.10    2.60
   7  -3  11   13.30    2.80
  -7  -3 -11   11.50    4.20
   7  -3 -11   17.10    2.40
  -7   3 -11   14.70    2.80
  -7  -3  11   13.00    2.60
   0  -4  11   30.20    3.80
   0   4 -11   28.30    4.30
   0   4 -11   25.60   11.70
   0  -4  11   24.30    3.80
   0   4 -11   28.00    4.40
   1  -4  11  769.52   27.80
   1   4 -11  722.03   37.10
   1   4 -11  776.42   27.40
   1   4 -11  768.52   37.10
   1  -4  11  757.52   25.80
  -1  -4 -11  743.53   32.10
   1   4 -11  764.22   26.00
  -1  -4  11  801.52   27.70
  -1   4 -11  807.92   26.30
  -1   4 -11  715.93   38.50
  -1  -4  11  761.22   26.00
  -1   4 -11  807.02   27.20
   2   4 -11   86.49   18.40
  -2  -4 -11   91.59   15.20
   2   4 -11   77.69   17.00
   2  -4  11   87.79    7.80
  -2  -4 -11   90.29    5.60
   2   4 -11   72.29    5.00
   2  -4  11   72.89    4.80
   2   4 -11   90.69    7.40
  -2   4 -11   94.49    6.30
  -2   4 -11   78.19   21.30
  -2  -4  11   81.79    6.60
  -3  -4 -11  316.47   12.30
   3  -4  11  329.87   16.10
  -3  -4 -11  299.17   18.30
  -3  -4 -11  308.17   14.30
   3   4 -11  299.67   15.10
   3   4 -11  331.87   13.10
   3  -4  11  333.77   12.10
   3  -4  11  309.97   13.40
   3   4 -11  306.27   46.60
  -3  -4 -11  313.07   14.40
   3   4 -11  322.77   12.20
   3  -4  11  318.17   14.20
  -3   4 -11  308.67   14.20
  -3  -4  11  327.37   13.80
  -3  -4  11  312.27   14.50
  -3   4 -11  299.17   15.90
  -3  -4  11  305.17   14.80
  -3  -4  11  281.47   17.10
  -3   4 -11  336.17   13.60
  -4  -4 -11  204.18   15.50
   4   4 -11  195.08   11.60
  -4  -4 -11  192.88    9.20
   4  -4  11  199.78    8.70
   4   4 -11  188.68    8.80
   4  -4  11  199.48   14.60
   4   4 -11  192.18   13.30
  -4   4 -11  184.48   13.60
  -4  -4  11  182.58   11.20
  -4  -4  11  207.88   10.70
  -4   4 -11  195.18   10.00
   4   4  11  203.28    8.60
   5  -4  11    8.20    3.50
   5  -4  11   10.60    2.90
   5   4 -11    7.00    6.80
   5  -4  11    7.40    8.40
  -5  -4 -11    2.60    2.80
   5  -4  11    5.20    3.80
   5   4 -11    8.30    2.80
  -5  -4 -11   -1.20    7.30
   5   4 -11    7.40    2.90
  -5  -4 -11    1.90    3.30
  -5  -4 -11    5.40    2.80
  -5   4 -11    8.40    4.00
  -5  -4  11    3.90    3.80
   5   4  11    9.20    5.70
   5  -4 -11    4.20    4.70
  -6  -4 -11   32.70    5.30
   6   4 -11   40.90    5.50
   6   4 -11   34.40    4.10
   6  -4  11   11.10   11.30
   6  -4  11   45.90    5.60
  -6  -4 -11   37.00    9.70
   6  -4  11   36.30    5.80
  -6  -4 -11   26.80    6.50
   6   4 -11   29.50    9.30
   6  -4  11   37.70    5.30
  -6  -4 -11   47.50    5.40
   6   4 -11   49.99    5.60
   6  -4 -11   28.90    4.10
   6  -4 -11   40.30    4.50
  -6  -4  11   37.10    5.10
   7  -4  11  299.37   11.00
   7   4 -11  292.47   11.00
   7  -4  11  295.67   11.30
  -7  -4 -11  278.97   13.10
  -7   4 -11  289.27   11.10
   7  -4 -11  286.07   10.70
  -7  -4  11  287.67   11.00
   0  -5  11    8.80    3.80
   0  -5  11   12.00    2.40
   0   5 -11    4.70    2.90
   0   5 -11   14.90    3.40
   0   5 -11   35.20   16.50
   1  -5  11   46.00    3.80
   1   5 -11   47.40   18.10
   1   5 -11   54.19    5.70
   1   5 -11   42.40   16.30
   1   5 -11   42.10    4.70
   1  -5  11   49.70    7.20
  -1   5 -11   41.40    4.80
  -1  -5  11   48.60    6.50
  -1  -5  11   41.20    4.40
   2   5 -11  441.26   16.40
   2   5 -11  467.55   18.60
   2   5 -11  348.37   42.80
   2  -5  11  436.46   17.40
   2   5 -11  466.35   17.20
   2  -5  11  442.16   17.70
  -2  -5 -11  455.55   16.70
   2  -5  11  465.75   19.00
   2   5 -11  506.85   40.40
   2  -5  11  474.75   20.00
  -2  -5  11  467.35   18.20
  -2  -5  11  459.45   16.80
  -2  -5  11  457.05   18.70
  -2   5 -11  474.25   17.60
  -2   5 -11  466.95   18.70
  -2  -5  11  434.66   19.70
  -2  -5  11  454.65   17.40
  -2   5 -11  464.15   20.20
   3  -5  11   49.80    7.70
   3   5 -11   37.80    5.60
   3  -5  11   66.49    7.20
   3  -5  11   47.40    4.40
   3   5 -11   49.50    5.60
   3   5 -11   57.39    4.90
  -3  -5 -11   51.89    4.80
  -3  -5 -11   49.60    7.90
   3  -5  11   64.39    6.70
  -3  -5 -11   46.80    6.10
  -3   5 -11   52.09    5.60
  -3  -5  11   45.60    7.60
  -3  -5  11   53.69    6.90
  -3  -5  11   45.90    7.60
  -3   5 -11   49.20    6.10
  -3   5 -11   54.39   10.10
  -3  -5  11   52.99    7.00
   4   5 -11   25.00    3.60
  -4  -5 -11   26.10    3.60
  -4  -5 -11   20.60    3.70
   4  -5  11   26.10    8.60
   4   5 -11   18.70    5.80
   4  -5  11   20.80    4.30
  -4  -5 -11   25.20    4.40
  -4  -5 -11   18.80   12.60
   4  -5  11   28.40    4.10
   4  -5  11   17.80    4.30
   4   5 -11   22.40    3.40
  -4  -5  11   27.70    5.60
  -4   5 -11   22.90    6.80
  -4   5 -11   17.80    4.30
  -4   5 -11   25.10    4.90
  -4  -5  11   27.70    5.10
  -4  -5  11   17.80    4.70
  -5  -5 -11   61.39   11.20
  -5  -5 -11   54.49    6.30
  -5  -5 -11   55.29    5.40
  -5  -5 -11   48.60    5.60
   5  -5  11   27.20   14.50
   5  -5  11   49.40    6.20
   5  -5  11   57.69    5.00
   5   5 -11   58.09    5.00
   5  -5  11   52.49    6.60
   5   5 -11   55.29    5.90
   5   5 -11   61.59    8.60
  -5  -5  11   49.30    8.50
  -5  -5  11   47.80    7.30
  -5  -5  11   52.79    5.80
  -5   5 -11   53.69    6.70
   5  -5 -11   54.69    6.10
   6   5 -11    4.70    2.30
   6  -5  11   -2.20    2.50
  -6  -5 -11   -0.10    2.70
   6  -5  11    3.60    3.10
   6  -5  11    1.50    3.00
   6   5 -11   -3.50    2.50
  -6  -5 -11    4.90    2.70
  -6   5 -11    3.80    3.00
   6  -5 -11    0.80    2.50
  -6  -5  11   -2.50    3.00
   7  -5  11    2.40    2.00
   7   5 -11    4.80    1.90
  -7  -5 -11    3.20    2.20
   7  -5  11    4.00    1.90
  -7   5 -11    7.20    2.20
  -7  -5  11    4.30    2.20
   0  -6  11   36.90    5.10
   0   6 -11   31.10    5.60
   0   6 -11   32.10    5.10
   0  -6  11   26.10    5.50
   0   6 -11   35.70    6.30
   1   6 -11  344.97   17.60
   1  -6  11  305.17   11.70
   1   6 -11  281.47   12.70
   1  -6  11  302.47   15.70
   1   6 -11  318.37   14.80
   1   6 -11  266.07   37.60
   1  -6  11  298.47   13.10
   1   6 -11  296.87   15.80
  -1  -6  11  300.27   12.10
  -1  -6  11  327.47   15.20
  -1   6 -11  288.77   15.50
  -1  -6  11  316.87   12.90
  -1  -6  11  257.67   16.60
  -1  -6  11  297.67   13.50
  -1   6 -11  321.57   14.40
   2  -6  11  466.85   18.70
  -2  -6 -11  479.45   17.60
   2  -6  11  488.55   17.40
   2   6 -11  477.15   19.40
   2   6 -11  453.05   21.60
   2  -6  11  468.25   19.70
   2   6 -11  481.25   17.80
  -2   6 -11  513.65   18.20
  -2   6 -11  499.75   21.30
  -2  -6  11  464.45   18.80
  -2  -6  11  472.15   17.50
  -2  -6  11  512.95   20.60
  -2  -6  11  491.25   18.10
  -2   6 -11  486.65   19.20
  -2  -6  11  472.95   20.30
   3   6 -11  219.58   11.00
  -3  -6 -11  210.08   12.50
  -3  -6 -11  222.48   12.10
   3   6 -11  247.08   12.80
   3  -6  11  255.67   11.70
  -3  -6 -11  263.67   11.30
   3  -6  11  256.87   17.00
  -3   6 -11  222.08   16.00
  -3  -6  11  223.78   13.00
  -3   6 -11  245.88   12.50
  -3  -6  11  238.68   11.10
  -3   6 -11  258.17   10.20
   4  -6  11   55.89    6.60
  -4  -6 -11   50.29    6.60
  -4  -6 -11   43.90    5.00
   4   6 -11   42.90    5.20
  -4  -6 -11   41.20    6.00
   4   6 -11   36.70    6.60
   4  -6  11   44.70    4.70
   4  -6  11   46.00    7.00
  -4   6 -11   60.49   10.20
  -4  -6  11   59.89    6.90
  -4   6 -11   50.99    6.50
  -4  -6  11   38.50    6.10
  -4  -6  11   40.20    6.50
  -5  -6 -11    4.10   12.80
   5  -6  11    4.60    3.70
   5  -6  11    1.60    2.50
  -5  -6 -11    6.60    2.80
   5  -6  11   14.50   13.70
  -5  -6 -11    5.00    2.80
   5   6 -11   -0.40    4.70
  -5  -6 -11    2.70    3.30
   5  -6  11    3.50    3.30
   5   6 -11    0.30    5.90
  -5  -6  11    0.30    3.90
  -5   6 -11   -2.30    3.20
   5  -6 -11    6.10    3.50
  -5  -6  11    5.00    6.00
   6   6 -11   33.70    4.20
  -6  -6 -11   34.40    4.50
   6  -6  11   31.30    4.70
   6  -6  11   32.40    4.60
  -6  -6 -11   31.20    4.20
   6  -6  11   36.20    4.20
  -6   6 -11   37.00    4.50
  -6  -6  11   28.70    5.00
   6  -6 -11   30.20    4.50
   7  -6  11    2.40    2.20
   7  -6  11    4.80    1.90
  -7  -6  11    3.10    2.10
   0   7 -11  141.89    9.30
   0   7 -11  111.39   10.30
   0  -7  11  125.19    8.60
   0  -7  11  125.59    6.70
   0   7 -11  130.49    7.60
   0  -7  11  161.08   11.90
   1   7 -11   38.10    6.60
   1  -7  11   34.60    4.10
   1   7 -11   29.50    4.50
   1  -7  11   43.60    7.40
   1   7 -11   32.80    6.40
   1  -7  11   27.30    4.70
  -1   7 -11   29.90    5.80
  -1   7 -11   42.10    5.10
  -1   7 -11   36.00    5.30
  -1  -7  11   35.10    5.70
  -1  -7  11   37.70    7.20
  -1  -7  11   14.70    8.30
  -1  -7  11   38.50    4.40
  -1  -7  11   40.80    5.40
   2  -7  11  358.56   20.70
  -2  -7 -11  377.16   14.40
   2   7 -11  355.26   17.60
   2  -7  11  368.46   14.10
   2  -7  11  351.76   16.80
   2   7 -11  383.56   16.00
  -2  -7  11  370.96   14.30
  -2   7 -11  357.96   13.40
  -2  -7  11  374.06   18.10
  -2  -7  11  402.26   18.10
   3  -7  11  121.19   17.40
   3   7 -11  120.49   13.40
   3  -7  11  130.89    7.10
  -3  -7 -11  136.89    9.60
   3   7 -11  130.09    9.70
   3  -7  11  139.79    9.40
   3  -7  11  136.59    8.70
  -3  -7 -11  129.09    8.90
  -3  -7 -11  140.19    7.40
  -3  -7  11  134.09   11.20
  -3  -7  11  114.59    7.80
  -3   7 -11  120.09   10.80
  -3  -7  11  130.99   10.90
  -3  -7  11  142.59    8.90
  -3   7 -11  125.59    8.80
  -4  -7 -11   28.00    4.60
   4  -7  11   20.60    4.20
  -4  -7 -11   33.60    5.50
  -4  -7 -11   41.50    6.30
   4  -7  11   34.50    4.60
   4   7 -11   28.00    6.20
   4  -7  11   22.10    4.00
  -4  -7  11   16.50    6.30
  -4  -7  11   22.90    5.50
  -4   7 -11   36.90    6.10
  -4  -7  11   25.70    4.10
  -4   7 -11   30.30    5.90
  -5  -7 -11   21.10    3.50
   5  -7  11   13.90    2.80
   5   7 -11   25.00    6.80
  -5  -7 -11   19.40    3.00
   5  -7  11   23.90    4.20
  -5  -7 -11   20.20    3.10
   5  -7  11   15.20    3.30
  -5   7 -11   31.30    5.20
  -5  -7  11   22.20    4.60
  -5  -7  11   24.40    3.90
   6  -7  11   71.49    6.00
   6  -7  11   57.49    5.30
  -6  -7 -11   79.09    4.80
  -6  -7 -11   51.29    5.30
   6  -7  11   66.69    4.60
  -6  -7  11   75.19    5.50
   0  -8  11  589.94   20.80
   0   8 -11  572.34   23.80
   0  -8  11  591.34   22.10
   0   8 -11  558.24   22.10
   0   8 -11  586.34   20.80
   0  -8  11  573.24   25.70
   1  -8  11   15.70    8.40
   1  -8  11   15.50    2.80
   1   8 -11   13.20    5.10
  -1  -8 -11   15.50    3.90
   1  -8  11   11.80    3.90
   1   8 -11   17.90    5.20
  -1  -8  11   12.80    3.20
  -1  -8  11   13.00    3.50
  -1   8 -11    8.90    4.10
  -1  -8  11   11.70    4.20
  -1  -8  11   14.00    7.40
  -1   8 -11   19.80    5.40
  -2  -8 -11  131.99    7.50
   2  -8  11  137.89    7.10
   2  -8  11  134.09    8.60
   2   8 -11  127.99    8.90
   2   8 -11  127.89   11.10
  -2  -8  11  143.39    9.00
  -2  -8  11  132.89   12.70
  -2   8 -11  123.69    8.70
  -2  -8  11  125.89   13.30
  -2  -8  11  123.29    7.60
  -2   8 -11  139.39   10.50
  -2  -8  11  140.39    7.90
  -3  -8 -11  303.87   14.20
   3  -8  11  313.07   13.50
   3   8 -11  288.67   16.30
  -3  -8 -11  321.97   13.00
   3  -8  11  328.37   13.40
   3  -8  11  304.57   14.70
   3   8 -11  309.77   14.70
  -3  -8 -11  318.27   13.60
  -3  -8  11  310.37   12.60
  -3   8 -11  314.27   15.40
  -3  -8  11  246.28   17.80
  -3   8 -11  315.27   13.70
  -3  -8  11  320.77   14.00
  -3  -8  11  310.37   16.00
   4   8 -11   50.99    6.50
   4  -8  11   70.79    6.20
   4  -8  11   60.79    5.00
   4  -8  11   66.19    7.60
  -4  -8 -11   75.49    9.90
  -4  -8 -11   66.99    5.30
  -4  -8 -11   69.99    5.80
  -4  -8  11   44.80    8.10
  -4   8 -11   63.69   10.00
  -4  -8  11   61.19    6.20
  -4   8 -11   59.89    6.00
  -5  -8 -11   10.00    2.80
  -5  -8 -11   17.40    2.60
   5  -8  11   18.20    2.90
  -5  -8 -11   15.00    3.20
   5  -8  11   15.80    2.80
   5  -8  11   22.60    3.70
   5   8 -11   20.30    3.10
  -5  -8  11   20.00    3.30
  -5   8 -11   17.60    3.00
  -5  -8  11   21.20    4.30
  -6  -8 -11   25.60    3.20
   6  -8  11   32.00    3.30
  -6  -8  11   16.70    3.50
   0  -9  11   28.40   10.60
   0  -9  11   31.20    4.80
   0  -9  11   24.30    3.90
   0   9 -11   20.90    4.30
   0  -9  11   20.00    3.20
   0   9 -11   42.10    8.00
   1  -9  11  145.89    7.20
   1   9 -11  136.39   10.70
   1  -9  11  135.49    8.70
  -1  -9 -11  136.19    8.70
   1  -9  11   99.69   13.80
  -1  -9  11  123.99    7.60
  -1  -9  11  145.89    7.50
  -1   9 -11  135.89   10.70
  -1  -9  11  132.09    8.80
  -1  -9  11  149.29   15.40
  -1   9 -11  129.19    8.70
   2  -9  11  162.08    9.10
  -2  -9 -11  156.78   11.10
  -2  -9 -11  156.18    8.20
   2   9 -11  159.78   11.10
   2  -9  11  164.68    7.90
  -2   9 -11  155.78    9.20
  -2  -9  11  164.98   14.80
  -2  -9  11  154.28    9.40
  -2  -9  11  140.09   15.10
  -2   9 -11  150.98   11.00
  -2  -9  11  156.38    8.50
  -2  -9  11  170.48    8.30
   3   9 -11   52.09   10.50
  -3  -9 -11   48.00    5.00
  -3  -9 -11   63.69    8.20
  -3  -9 -11   46.20    6.30
   3  -9  11   59.49    6.00
   3  -9  11   53.99    4.70
  -3   9 -11   38.30    7.00
  -3  -9  11   54.59    9.60
  -3  -9  11   61.29    6.00
  -3   9 -11   59.29    5.90
  -3  -9  11   61.29    6.60
  -3  -9  11   55.09    8.10
   4  -9  11   17.40    3.30
  -4  -9 -11   25.20    4.20
  -4  -9 -11   16.30    2.80
   4  -9  11   25.30    3.90
  -4  -9 -11   16.80    3.40
  -4   9 -11   20.30    3.20
  -4  -9  11   20.60    3.20
  -4  -9  11   10.50    4.90
  -5  -9 -11    9.90    2.40
   5  -9  11   14.70    2.60
  -5  -9 -11   17.70    2.90
  -5  -9 -11   10.30    2.00
   5  -9  11   13.20    2.60
  -5  -9  11   12.90    2.90
  -5  -9  11    9.30    3.70
   0 -10  11   62.19    6.50
   0 -10  11   49.00   14.30
   0  10 -11   59.59    8.20
   0 -10  11   68.29    5.40
   0 -10  11   57.69    5.50
   1 -10  11   70.39    5.30
   1  10 -11   72.29    8.10
   1 -10  11   85.59    6.70
  -1 -10 -11   73.29    6.20
  -1 -10  11   73.89    5.70
  -1 -10  11   76.99    5.80
  -1 -10  11   67.29    6.60
  -1  10 -11   75.89    6.60
  -1  10 -11   79.89    8.50
  -1 -10  11   68.89   12.30
  -2 -10 -11   16.70    3.00
  -2 -10 -11   17.90    4.20
   2  10 -11   17.90    5.20
   2 -10  11   17.80    3.00
  -2 -10  11   16.40    3.50
  -2 -10  11   30.70   10.90
  -2 -10  11   24.40    4.50
  -3 -10 -11    0.50    3.90
   3 -10  11   -0.70    2.70
  -3 -10 -11    0.50    2.70
   3  10 -11    0.40    4.30
  -3 -10 -11    1.20    2.30
   3 -10  11    2.30    2.20
  -3 -10  11    2.00    2.70
  -3  10 -11    2.10    4.00
  -3 -10  11    1.90    2.70
  -3  10 -11    3.30    2.80
   4 -10  11  141.19    7.00
  -4 -10 -11  135.19    7.00
  -4 -10 -11  140.09    6.70
  -4 -10 -11  145.69    6.50
   4 -10  11  143.09    6.50
  -4 -10  11  135.39   10.60
  -4 -10  11  137.49    6.70
   0  11 -11   49.70    6.80
   0 -11  11   42.00    4.60
   0 -11  11   49.10    4.40
   0 -11  11   51.59    5.50
  -1 -11 -11    1.80    2.90
   1 -11  11    0.40    2.70
   1 -11  11    1.50    2.40
   1  11 -11   -1.50    3.40
   1 -11  11    0.80    2.10
  -1 -11  11    1.10    2.80
  -1 -11  11    0.00    2.20
  -1 -11  11   -0.50    2.70
  -1  11 -11   -1.10    3.30
   2 -11  11    6.80    2.10
   2 -11  11    7.60    2.30
  -2 -11 -11   14.40    3.30
   2  11 -11   14.70    3.80
  -2 -11 -11    3.80    2.40
   2 -11  11   11.60    2.80
  -2  11 -11   11.70    3.50
  -2 -11  11    9.50    2.30
  -2 -11  11    9.90    2.60
   3 -11  11    2.50    1.70
  -3 -11 -11    3.50    2.10
   3 -11  11    3.10    2.20
   3 -11  11    2.10    2.30
  -3 -11 -11    9.30    2.40
  -3  11 -11    9.00    4.20
  -3 -11  11    3.50    2.10
  -4 -11 -11   46.70    3.30
   4 -11  11   34.90    4.20
   4 -11  11   47.10    3.00
  -4 -11  11   42.70    3.60
   0 -12  11    2.50    1.80
   0 -12  11    8.10    2.80
   0 -12  11    3.00    2.20
   0  12 -11    1.10    2.60
   1 -12  11   26.60    3.20
  -1 -12 -11   20.30    3.20
   1 -12  11   30.20    3.90
   1 -12  11   27.60    4.00
  -1 -12 -11   24.60    4.20
   1  12 -11   32.20    4.70
  -1 -12  11   26.60    3.30
  -1 -12  11   30.10    3.80
  -1  12 -11   27.80    4.70
   2  12 -11  166.08    8.30
  -2 -12 -11  142.29    7.00
  -2 -12 -11  158.18    6.90
   2 -12  11  163.98    7.20
   2 -12  11  162.38    8.10
   2 -12  11  159.58    6.40
  -2 -12  11  150.08    6.90
  -2  12 -11  149.99    7.80
   3 -12  11    3.60    1.50
  -3 -12 -11    7.90    1.90
  -3 -12  11    6.30    1.80
   0  13 -11  218.78    8.60
   0 -13  11  200.68    7.90
   0   0 -12 1937.71   65.39
   0   0  12 1979.40   63.49
   0   0 -12 2032.90   69.19
  -1   0 -12  946.21   32.90
  -1   0 -12  954.90   38.10
   1   0 -12  943.71   36.40
   1   0  12  969.70   31.80
   2   0 -12  380.56   20.00
  -2   0 -12  382.46   24.60
   2   0  12  415.46   24.80
   2   0  12  405.96   14.90
   2   0 -12  360.96   20.70
  -2   0 -12  400.06   14.10
  -2   0 -12  377.16   15.60
   2   0 -12  389.36   28.80
  -3   0 -12    3.40    2.30
  -3   0 -12    2.40    4.10
   3   0  12   -7.20   15.90
   3   0 -12   -8.20   12.10
   3   0 -12    0.90    3.00
   3   0 -12    0.60   11.50
   3   0  12   -0.10    3.00
  -3   0 -12   41.20   18.70
  -4   0 -12   27.30    4.00
   4   0  12   27.60    4.70
  -4   0 -12   19.10    6.50
  -4   0 -12   20.00    4.60
   4   0  12   26.00    4.40
   4   0 -12   20.00    3.20
  -4   0 -12   28.20    6.70
  -4   0  12   16.60    4.40
   4   0 -12   22.80    5.80
   4   0  12   13.60    4.90
   5   0  12  436.46   19.00
   5   0  12  422.16   16.70
   5   0  12  399.26   17.20
  -5   0 -12  414.96   18.40
   5   0 -12  429.26   15.80
   5   0 -12  407.56   16.70
  -5   0  12  418.76   16.60
  -5   0 -12  402.96   15.80
  -5   0 -12  409.56   16.90
  -5   0 -12  418.56   18.90
  -6   0  12   11.10    3.30
   6   0  12   15.60    4.00
   6   0  12    1.50    6.40
   6   0  12   10.90    3.40
   6   0 -12   11.70    2.80
   6   0 -12    8.70    2.60
  -6   0 -12    0.30    5.80
  -6   0 -12   10.80    4.60
   6   0 -12   10.00    3.70
   7   0 -12   24.30    4.50
   7   0 -12   25.50    3.20
   7   0  12   23.10    3.70
   7   0 -12   21.10    3.20
  -7   0 -12   19.50    3.60
   7   0  12   23.90    3.00
   0   1 -12 1500.15   56.79
   0  -1  12 1565.14   51.09
   0   1 -12 1551.94   52.09
   0  -1 -12 1657.53   55.29
   1   1 -12  891.31   32.00
   1  -1  12  926.01   31.00
   1   1 -12  942.71   36.70
   1   1 -12  913.01   35.60
  -1  -1 -12  944.11   36.50
  -1   1  12  853.41   35.20
  -1  -1 -12  873.51   31.90
   1   1  12  964.20   36.20
  -1   1 -12  896.21   37.50
   1  -1 -12  931.61   34.00
  -1  -1  12  924.51   30.30
   1   1  12  942.21   29.90
  -1   1 -12  900.71   31.50
   2   1 -12   68.49   10.60
   2  -1  12   82.49   12.20
  -2  -1 -12   90.69    7.70
   2   1 -12   56.59    9.60
  -2  -1 -12   80.09   12.40
   2   1 -12   77.29   13.10
   2   1 -12   76.79    5.50
  -2  -1 -12   77.69    5.10
   2  -1  12   86.19    5.80
   2  -1 -12   93.29   13.00
  -2   1 -12   94.29   14.20
  -2  -1  12   81.69    4.00
  -2   1 -12   76.59    5.00
  -2   1 -12   85.09    6.20
   2  -1 -12   99.49   11.00
   2  -1 -12   70.59   10.90
   2   1  12   84.89    5.00
   2   1  12   70.09   13.40
  -3  -1 -12  578.54   22.00
   3  -1  12  556.64   21.20
   3  -1  12  549.95   19.10
   3   1 -12  504.85   33.70
  -3  -1 -12  554.24   19.30
   3   1 -12  509.85   32.90
   3  -1  12  556.64   38.90
   3   1 -12  562.14   19.40
  -3  -1 -12  509.85   38.90
   3  -1 -12  542.25   19.70
   3   1  12  596.64   20.70
   3  -1 -12  532.05   29.30
   3  -1 -12  494.65   29.20
  -3   1 -12  584.14   40.90
  -3   1 -12  552.44   21.20
   3   1  12  517.35   38.50
   4   1 -12   74.69    7.90
   4  -1  12   86.59    7.10
   4  -1  12   81.59    8.00
  -4   1  12   75.79    7.80
  -4  -1 -12   78.89    8.90
  -4  -1 -12   85.29    6.60
   4  -1  12   77.19    5.80
   4  -1  12   84.69    8.40
  -4  -1 -12   79.19   13.00
   4   1 -12   70.99    5.50
  -4  -1 -12   67.99    7.10
  -4  -1 -12   78.99    5.40
  -4   1 -12   84.89    7.60
  -4   1 -12   75.99    6.80
   4   1  12   73.19    7.30
   4   1  12   71.49    8.90
  -4   1 -12   72.69   10.10
  -4  -1  12   84.59    7.50
  -4   1 -12   74.79    7.80
  -4   1 -12   67.89    6.60
   4   1  12   79.99    7.70
   4  -1 -12   72.89    5.70
  -5   1  12  315.87   13.20
   5   1 -12  331.67   12.70
  -5  -1 -12  305.07   12.90
   5  -1  12  315.97   16.50
  -5  -1 -12  304.27   16.40
  -5  -1 -12  309.67   13.80
   5   1 -12  314.37   13.40
  -5  -1 -12  309.67   12.80
   5  -1  12  311.47   13.50
   5  -1  12  313.17   14.20
  -5  -1 -12  319.07   16.00
   5  -1 -12  319.27   12.60
  -5   1 -12  310.37   15.00
  -5   1 -12  312.27   15.30
   5   1  12  308.77   13.50
  -5  -1  12  305.37   13.70
   5  -1 -12  293.77   14.00
  -5   1 -12  310.67   13.90
   5   1  12  286.37   15.10
   5   1  12  291.07   14.10
   6   1 -12    6.30    2.60
   6  -1  12   -7.90    6.30
  -6  -1 -12   10.30    6.40
   6   1 -12    3.40    2.50
   6  -1  12    2.40    3.30
   6  -1  12    3.70    3.10
   6   1 -12    5.40    3.40
  -6  -1 -12   -1.60    4.60
  -6  -1 -12    5.30    3.40
   6   1  12   -0.20    3.10
  -6   1 -12    3.70    5.60
   6  -1 -12    1.10    3.00
   6  -1 -12   -0.50    3.80
  -6   1 -12   -2.20    3.80
   6   1  12    9.90    5.80
   6  -1 -12    1.00    2.30
  -6  -1  12    2.20    3.00
   7  -1  12   58.89    5.50
   7   1 -12   61.89    4.90
   7  -1  12   65.69    5.00
   7   1 -12   65.79    4.60
   7   1 -12   65.69    4.30
  -7  -1 -12   62.59    6.30
   7   1  12   63.99    5.10
  -7   1 -12   61.19    5.90
   7  -1 -12   74.89    6.90
  -7  -1  12   66.49    4.70
   7  -1 -12   62.29    4.40
   7  -1 -12   61.99    5.70
   0  -2  12 3904.51  125.79
   0   2  12 3773.92  127.69
   0   2 -12 3891.71  132.29
   0  -2 -12 4095.09  128.39
   1   2 -12  323.27   13.70
   1  -2  12  337.87   13.20
   1   2 -12  346.27   19.20
   1   2 -12  317.07   19.70
  -1  -2 -12  338.27   18.30
  -1   2 -12  356.56   12.80
  -1   2 -12  335.87   21.30
  -1   2 -12  323.27   13.30
   1  -2 -12  336.27   14.80
  -1  -2  12  328.47   12.70
  -2  -2 -12   46.00    6.60
  -2  -2 -12   44.80    4.40
   2  -2  12   38.20    4.30
   2  -2  12   48.90    5.40
   2   2 -12   49.99    7.50
   2   2 -12   42.50    4.30
   2   2 -12   56.09   11.50
  -2  -2 -12   40.60   10.60
   2   2 -12   57.99   11.90
   2  -2 -12   43.40    9.10
  -2   2 -12   53.89   13.50
  -2   2 -12   34.10    4.30
   2   2  12   45.90    3.50
   2   2  12   51.09   12.50
   2  -2 -12   35.20    6.60
  -2   2 -12   48.00    5.20
  -2  -2  12   40.80    4.00
   3   2 -12  131.89   20.20
   3  -2  12  150.08    6.90
  -3  -2 -12  134.99   21.90
   3   2 -12  149.79    7.10
  -3  -2 -12  152.88   10.90
   3  -2  12  152.88    9.30
  -3  -2 -12  151.88    7.10
   3  -2  12  135.39   22.00
   3   2 -12  134.49   19.80
   3  -2  12  147.19    9.80
   3   2 -12  150.08   12.00
   3  -2  12  139.19    8.80
   3  -2 -12  116.89   16.80
  -3   2 -12  130.09   25.20
  -3  -2  12  129.59    9.60
   3  -2 -12  149.88   17.30
  -3   2 -12  143.99    7.70
  -3   2 -12  141.19    9.60
   3   2  12  151.78   23.30
   3   2  12  149.69    7.70
  -3  -2  12  153.98    7.20
  -3   2 -12  144.89    9.60
  -3   2 -12  146.89    8.80
  -4  -2 -12  175.98    8.10
   4  -2  12  155.98    9.10
   4  -2  12  164.98    7.90
   4   2 -12  185.38    9.50
  -4  -2 -12  192.18   12.50
   4  -2  12  167.38   10.00
  -4  -2 -12  167.18    9.10
   4   2 -12  178.78    8.20
  -4  -2 -12  169.78    9.80
   4  -2  12  164.38   11.40
  -4   2 -12  164.38   10.10
  -4  -2  12  172.28   10.00
  -4   2 -12  170.18    9.40
  -4   2 -12  184.38   10.90
   4  -2 -12  169.58    8.80
   4   2  12  165.58    9.40
   4   2  12  183.28   10.60
   5   2 -12   36.90    4.80
  -5  -2 -12   43.90    6.50
   5   2 -12   37.20    5.80
   5   2 -12   45.10   11.00
  -5  -2 -12   40.90    5.60
   5  -2  12   54.39    6.80
  -5  -2 -12   47.40    5.40
  -5  -2 -12   51.69    8.30
   5  -2  12   47.10    6.10
   5  -2  12   56.59    5.80
   5  -2  12   48.30    7.80
  -5  -2 -12   44.60    7.50
   5  -2 -12   34.30    5.90
   5   2  12   49.50    7.70
   5  -2 -12   39.30    4.90
  -5   2 -12   34.20    5.70
  -5  -2  12   39.60    6.50
  -5   2 -12   46.80    8.00
   5   2  12   51.49    6.70
  -6  -2 -12    5.50    3.20
   6  -2  12   23.80    8.50
   6   2 -12    7.10    2.60
   6  -2  12    8.20    3.10
  -6  -2 -12    6.30    6.90
   6  -2  12    5.50    3.40
   6   2 -12    6.00    2.50
   6   2  12   12.40    5.60
  -6   2 -12    7.00    3.80
   6  -2 -12    4.10    4.40
  -6  -2  12    7.90    3.20
   6  -2 -12    8.80    2.50
   7  -2  12   15.70    3.00
   7   2 -12   18.80    2.80
   7   2 -12   15.50    2.10
   7   2 -12   13.00    2.80
  -7  -2 -12   14.50    3.80
   7  -2  12   10.60    2.50
   7  -2 -12   14.10    3.60
   7  -2 -12   20.10    3.30
  -7   2 -12   17.90    3.20
  -7  -2  12   13.10    2.60
   7  -2 -12   12.50    2.30
   0  -3 -12  749.33   27.50
   0  -3  12  697.63   25.70
   0   3 -12  763.72   34.70
   0   3 -12  727.13   24.70
   0   3 -12  725.53   25.90
   1  -3  12 1013.40   33.50
   1   3 -12  954.80   31.90
   1   3 -12  941.11   40.20
   1  -3  12  940.41   31.80
   1   3 -12  952.20   33.30
   1   3 -12  896.21   41.30
  -1  -3 -12  973.70   38.10
  -1   3 -12  979.50   33.10
  -1   3 -12  950.60   31.90
   1   3  12  925.71   37.90
  -1   3 -12  938.91   42.30
  -1  -3  12 1018.60   33.10
   2   3 -12  488.45   17.10
   2  -3  12  486.25   16.80
   2  -3  12  483.15   19.00
   2   3 -12  437.76   29.30
  -2  -3 -12  474.45   17.10
  -2  -3 -12  465.45   28.70
   2   3 -12  490.75   30.10
   2   3 -12  474.15   19.00
  -2   3 -12  478.45   17.20
  -2   3 -12  485.85   18.30
  -2   3 -12  446.86   33.50
  -2  -3  12  504.95   18.20
   3   3 -12   26.50   21.70
  -3  -3 -12    7.90    2.60
   3  -3  12    5.10    4.40
  -3  -3 -12    8.90    5.20
   3   3 -12    6.40    5.20
   3  -3  12    4.80    4.00
   3   3 -12   -1.70    3.80
   3   3 -12    5.10    2.20
   3   3 -12   15.10   18.80
  -3  -3 -12    7.70   22.10
  -3  -3 -12    8.20    7.10
  -3  -3 -12    3.30    4.70
   3  -3  12   34.60   23.10
   3  -3 -12    6.00    8.90
  -3  -3  12    6.90    3.00
  -3   3 -12    3.00    5.10
  -3   3 -12   -7.50    6.20
  -3   3 -12   10.40    4.30
  -3  -3  12   18.30    4.60
  -3   3 -12    8.90    4.20
   3   3  12    7.40    2.60
  -3  -3  12   11.70    6.10
   4  -3  12   82.19    9.90
   4  -3  12   65.49    5.10
   4   3 -12   68.69    5.20
  -4  -3 -12   71.29   11.30
   4  -3  12   68.39    7.20
   4   3 -12   61.69    6.40
  -4  -3 -12   68.59    5.20
   4   3 -12   73.19    9.30
  -4  -3 -12   68.59    7.40
  -4  -3 -12   71.99    6.50
   4  -3  12   59.79    6.70
  -4   3 -12   69.49    7.30
  -4  -3  12   61.19    7.30
  -4   3 -12   53.49   10.60
   4   3  12   73.09    6.30
  -4  -3  12   71.29    6.20
   4  -3 -12   96.49   11.00
  -4   3 -12   58.29    7.30
  -5  -3 -12   35.20    8.20
  -5  -3 -12   34.30    5.00
   5   3 -12   20.70    3.20
  -5  -3 -12   32.40    5.10
   5   3 -12   12.60    8.70
   5  -3  12   37.90    8.40
   5  -3  12   18.10    4.20
   5   3 -12   17.20    3.40
   5  -3  12   29.90    3.70
   5  -3  12   23.30    4.60
  -5  -3 -12   30.40    7.80
  -5  -3 -12   27.80    4.70
   5  -3 -12   37.80    4.80
  -5  -3  12   22.60    4.50
  -5   3 -12   29.80    5.40
   5   3  12   26.70    5.10
  -5   3 -12   33.30    5.40
   5   3  12   27.50    4.70
   6  -3  12  122.79   11.20
  -6  -3 -12   95.29    6.50
   6   3 -12  104.79    6.10
   6  -3  12   92.99   11.80
   6  -3  12  106.79    9.40
  -6  -3 -12   95.89   10.30
   6   3 -12  101.89    7.50
  -6  -3 -12   83.49   14.00
   6   3 -12  134.49   19.70
  -6  -3  12  107.19   10.60
   6  -3 -12   96.09    5.90
   6  -3 -12   96.39    7.10
  -6   3 -12  108.99   11.20
   7  -3  12   53.69    4.40
   7   3 -12   58.59    4.20
  -7  -3 -12   59.59    6.90
   7  -3  12   53.99    4.10
  -7   3 -12   46.70    4.70
  -7  -3  12   48.50    4.20
   7  -3 -12   56.59    3.90
   0   4 -12  964.90   34.20
   0   4 -12 1000.70   33.00
   0  -4  12 1018.10   34.70
   0   4 -12  955.90   45.30
   0  -4  12 1008.10   32.90
   1  -4  12  312.47   13.90
   1   4 -12  235.18   39.80
   1  -4  12  311.47   11.80
   1   4 -12  324.97   25.90
   1   4 -12  317.47   13.50
   1   4 -12  317.47   12.00
  -1  -4 -12  330.87   20.20
  -1  -4  12  317.17   13.50
  -1   4 -12  332.67   28.90
  -1   4 -12  322.57   13.20
  -1  -4  12  303.47   12.20
  -1   4 -12  313.37   12.10
  -2  -4 -12   29.40    4.50
  -2  -4 -12   47.30   14.90
   2   4 -12   27.20    3.90
   2   4 -12   32.10   18.50
   2   4 -12   60.89   17.40
   2  -4  12   30.90    3.70
   2   4 -12   40.70    5.40
   2  -4  12   34.20    5.40
   2  -4  12   28.20    6.10
   2   4 -12   28.80    5.70
  -2   4 -12   39.00    5.20
  -2  -4  12   37.00    5.50
   3  -4  12  225.48   14.40
  -3  -4 -12  234.48    9.90
   3  -4  12  237.48    9.60
   3  -4  12  216.38   10.70
   3   4 -12  219.48   10.60
  -3  -4 -12  252.27   12.30
  -3  -4 -12  241.68   12.50
   3  -4  12  231.28   11.90
   3   4 -12  231.98    9.70
  -3   4 -12  223.08   11.10
  -3  -4  12  243.38   12.40
  -3   4 -12  225.78   12.20
  -3  -4  12  242.38   11.50
  -3  -4  12  233.58   11.90
  -3   4 -12  242.18   13.60
  -3  -4  12  215.28   14.90
   4   4 -12  122.49    7.40
   4  -4  12  118.89   12.70
   4   4 -12  120.99   11.30
   4  -4  12  106.99    8.60
   4  -4  12  132.19    8.00
  -4  -4 -12  124.19    8.40
   4   4 -12  109.09    6.50
   4  -4  12  107.69    6.40
  -4  -4 -12  125.99   14.90
  -4  -4 -12  102.79    7.80
  -4  -4 -12  113.29    6.70
  -4  -4  12  117.99    8.60
  -4  -4  12  107.59   14.00
  -4   4 -12  106.99    8.10
  -4   4 -12  113.19    9.00
  -4  -4  12  124.49    9.20
  -5  -4 -12  208.18    9.60
   5  -4  12  198.88   10.20
   5  -4  12  218.78   10.40
  -5  -4 -12  190.18   21.40
   5   4 -12  220.88   11.10
   5  -4  12  161.78   17.80
  -5  -4 -12  203.08   10.50
   5  -4  12  193.38   10.70
   5   4 -12  202.48    9.40
  -5  -4 -12  215.38   11.10
   5   4 -12  153.78   17.90
  -5   4 -12  193.38   11.00
   5  -4 -12  203.78    9.30
  -5  -4  12  202.88   11.20
  -6  -4 -12   25.60    9.90
   6   4 -12   37.90    3.90
   6  -4  12   36.30    5.80
   6   4 -12   26.30    3.70
  -6  -4 -12   30.10    5.00
   6  -4  12   34.10    4.80
   6  -4  12   41.70    5.60
  -6  -4 -12   27.30    3.50
  -6  -4  12   31.00    4.30
  -6   4 -12   25.40    4.00
   6  -4 -12   26.40    4.20
   6  -4 -12   38.90    4.30
  -7  -4 -12   33.10    6.00
   7   4 -12   41.20    3.60
   7  -4  12   41.60    3.80
   7  -4  12   43.60    3.90
   7  -4 -12   39.90    3.80
  -7   4 -12   40.20    3.90
  -7  -4  12   42.60    4.20
   0   5 -12   68.69    5.80
   0  -5  12   76.29    4.80
[truncated: 340,346 more chars]
